# Supplementary material for: Genome-wide association study identifies novel genomic regions associated with yield-related traits in cassava (Manihot esculenta Crantz)
Source: Research Square preprint supplement (doi:10.21203/rs.3.rs-8007567/v1), 2025-12-01
Supplement: Supplementary file 1 [file 4a150f8f4cf27b6f0e5f2389.xlsx]

## Sheet: accession list
Genotype	Source		Genotype ID	Accession name	ID	Accession name	levels of stem branching	Color of root pulp	Source/origin
Sika bankye	improved		G1	Sika_bankye	1	Sika_bankye	3	cream	improved variety
Broni	improved		G2	IBA_020452	2	IBA_020452	0	cream	IITA
Bankyehemaa	improved		G3	Broni	3	Broni	2	cream	improved variety
Afisiafi	improved		G4	IBA011368	4	IBA011368	3	yellow	IITA
Nyerikogba	improved		G5	Bankyehemaa	5	Bankyehemaa	1	cream	improved variety
Doku duade	improved		G6	Debor	6	Debor	1	cream	landrace, Ghana
Abrabopa	improved		G7	Afisiafi	7	Afisiafi	2	white	improved variety
Ampong	improved		G8	UCC_2001_143	8	UCC_2001_143	2	white	landrace, Ghana
Abasafita	improved		G9	C_1090090	9	C_1090090	4	yellow	IITA
Amansen	improved		G10	UCC_2001_157	10	UCC_2001_157	2	cream	landrace, Ghana
Essambankye	improved		G11	Ucc_2001_454	11	Ucc_2001_454	2	white	landrace, Ghana
Fil-Indiakonia	improved		G12	Duade_kpakpa	12	Duade_kpakpa	1	cream	improved variety
Duade kpakpa	improved		G13	O.D	13	O.D	2	cream	landrace, Ghana
Tek Bankye	improved		G14	Nyerikogba	14	Nyerikogba	1	cream	improved variety
IFAD	improved		G15	C_1083703	15	C_1083703	2	yellow	IITA
Bediako	improved		G16	KW_2000_148	16	KW_2000_148	1	cream	landrace, Ghana
Otuhia	improved		G17	DMA_2000_070	17	DMA_2000_070	1	cream	landrace, Ghana
UCC Bankye	improved		G18	Doku_duade	18	Doku_duade	1	cream	improved variety
Nkabom	improved		G19	C_1011797	19	C_1011797	1	cream	IITA
Agbelifia	improved		G20	SW_2000_006	20	SW_2000_006	0	cream	landrace, Ghana
AGRA	improved		G21	C_1083724	21	C_1083724	2	yellow	IITA
Dudzi	improved		G22	C_96_1613	22	C_96_1613	3	cream	IITA
Eskamaye	improved		G23	BD_96_141	23	BD_96_141	2	cream	landrace, Ghana
KW-2000-148	landrace		G24	Ucc_2001_461	24	Ucc_2001_461	4	white	landrace, Ghana
DMA-2000-070	landrace		G25	IBA010040	25	IBA010040	3	cream	IITA
UCC-2001-218	landrace		G26	Abrabopa	26	Abrabopa	3	white	improved variety
BD-96-065	landrace		G27	TA_97_047	27	TA_97_047	2	cream	landrace, Ghana
UCC-2001-184	landrace		G28	UCC_2000_002	28	UCC_2000_002	2	white	landrace, Ghana
ADE-2000-046	landrace		G29	BD_96_157	29	BD_96_157	1	cream	landrace, Ghana
SW-2000-006	landrace		G30	IBA_010034	30	IBA_010034	2	cream	IITA
BD-96-141	landrace		G31	Eskamaye	31	Eskamaye	2	cream	improved variety
Ucc-2001-461	landrace		G32	NKZ_2000_034	32	NKZ_2000_034	2	white	landrace, Ghana
NKZ-2000-034	landrace		G33	IBA_070134	33	IBA_070134	2	cream	IITA
Ksi-2000-179	landrace		G34	Ksi_2000_179	34	Ksi_2000_179	2	cream	landrace, Ghana
UCC-2001-507	landrace		G35	Amasen	35	Amasen	3	cream	improved variety
KSI-2000-001	landrace		G36	Ampong	36	Ampong	3	cream	improved variety
UCC-2001-243	landrace		G37	IBA_011371	37	IBA_011371	4	yellow	IITA
UCC-2001-015	landrace		G38	C_01_1206	38	C_01_1206	3	yellow	IITA
AFS-2000-050	landrace		G39	C_1083774	39	C_1083774	2	yellow	IITA
SW-2000-220	landrace		G40	IFAD	40	IFAD	0	cream	improved variety
ADE-2000-097	landrace		G41	UCC_2001_507	41	UCC_2001_507	2	cream	landrace, Ghana
WCH-2000-037	landrace		G42	Essambankye	42	Essambankye	3	cream	improved variety
UCC-2001-011	landrace		G43	KSI_2000_001	43	KSI_2000_001	3	cream	landrace, Ghana
UCC-2001-464	landrace		G44	TME149	44	TME149	1	cream	IITA
BD-96-115	landrace		G45	UCC_2001_243	45	UCC_2001_243	3	cream	landrace, Ghana
UCC-2001-249	landrace		G46	IBA_30572	46	IBA_30572	3	cream	IITA
KSI-2000-036	landrace		G47	ABASAFITA	47	ABASAFITA	3	cream	improved variety
DMA-2000-024	landrace		G48	SW_2000_095	48	SW_2000_095	2	white	landrace, Ghana
UCC-2001-296	landrace		G49	UCC_2001_015	49	UCC_2001_015	3	cream	landrace, Ghana
BIABESE	landrace		G50	IBA_950289	50	IBA_950289	2	white	IITA
UCC-2001-144	landrace		G51	C_1082264	51	C_1082264	3	yellow	IITA
TA-97-047	landrace		G52	Fil_Indiakonia	52	Fil_Indiakonia	2	cream	improved variety
UCC-2000-002	landrace		G53	AFS_2000_050	53	AFS_2000_050	2	white	landrace, Ghana
UCC-2001-004	landrace		G54	SW_2000_220	54	SW_2000_220	2	white	landrace, Ghana
KSI-2000-191	landrace		G55	UCC_2001_270	55	UCC_2001_270	2	white	landrace, Ghana
UCC-2001-195	landrace		G56	UCC_2001_218	56	UCC_2001_218	2	cream	landrace, Ghana
Debor	landrace		G57	BD_96_065	57	BD_96_065	2	cream	landrace, Ghana
OFF-2000-087	landrace		G58	C_1070557	58	C_1070557	1	yellow	IITA
Ucc-2001-143	landrace		G59	IBA9102324	59	IBA9102324	1	cream	IITA
Ucc-2001-454	landrace		G60	UCC_2001_004	60	UCC_2001_004	2	white	landrace, Ghana
UCC-2001-270	landrace		G61	UCC_2001_184	61	UCC_2001_184	3	cream	landrace, Ghana
UCC-2001-157	landrace		G62	ADE_2000_046	62	ADE_2000_046	2	white	landrace, Ghana
O.D	landrace		G63	OFF_2000_087	63	OFF_2000_087	2	cream	landrace, Ghana
1090090	exotic		G64	C_1085392	64	C_1085392	1	yellow	IITA
IBA96/0581	exotic		G65	KSI_2000_191	65	KSI_2000_191	2	cream	landrace, Ghana
IBA020431	exotic		G66	UCC_2001_195	66	UCC_2001_195	3	cream	landrace, Ghana
1011797	exotic		G67	UCC_BANKYE	67	UCC_BANKYE	2	cream	landrace, Ghana
1083724	exotic		G68	ADE_2000_097	68	ADE_2000_097	1	white	landrace, Ghana
96/1613	exotic		G69	C_1090151	69	C_1090151	2	yellow	IITA
IBA010040	exotic		G70	WCH_2000_037	70	WCH_2000_037	1	white	landrace, Ghana
IBA-010034	exotic		G71	NKABOM	71	NKABOM	3	cream	improved variety
01/1206	exotic		G72	UCC_2001_011	72	UCC_2001_011	2	cream	landrace, Ghana
1083774	exotic		G73	UCC_2001_464	73	UCC_2001_464	2	white	landrace, Ghana
TME 149	exotic		G74	AGBELIFIA	74	AGBELIFIA	3	cream	improved variety
IBA 30572	exotic		G75	TEKBANKYE	75	TEKBANKYE	3	cream	improved variety
IBA-950289	exotic		G76	BD_96_009	76	BD_96_009	2	white	landrace, Ghana
1082264	exotic		G77	OTUHIA	77	OTUHIA	4	cream	improved variety
1070557	exotic		G78	BD_96_115	78	BD_96_115	4	cream	landrace, Ghana
IBA9102324	exotic		G79	UCC_2001_249	79	UCC_2001_249	2	cream	landrace, Ghana
1085392	exotic		G80	KSI_2000_036	80	KSI_2000_036	2	cream	landrace, Ghana
1090151	exotic		G81	DMA_2000_024	81	DMA_2000_024	3	cream	landrace, Ghana
IBA 98/0505	exotic		G82	BEDIAKO	82	BEDIAKO	3	cream	improved variety
IBA993073	exotic		G83	IBA96_0581	83	IBA96_0581	2	cream	IITA
IBA-061635	exotic		G84	IBA020431	84	IBA020431	2	cream	IITA
IBA 020452	exotic		G85	UCC_2001_296	85	UCC_2001_296	2	cream	landrace, Ghana
IBA011368	exotic		G86	BIABESE	86	BIABESE	2	white	landrace, Ghana
			G87	ADE_2000_038	87	ADE_2000_038	3	cream	landrace, Ghana
			G88	IBA_061635	88	IBA_061635	2	cream	IITA
			G89	UCC_2001_144	89	UCC_2001_144	2	white	landrace, Ghana
			G90	AGRA	90	AGRA	3	cream	improved variety
			G91	IBA98_0505	91	IBA98_0505	4	cream	IITA
			G92	IBA993073	92	IBA993073	3	cream	IITA
			G93	DUDZI	93	DUDZI	3	white	improved variety
			G94	OFF_2000_023	94	OFF_2000_023	2	cream	landrace, Ghana

## Sheet: population structure results
	Overall proportion of membership in each subgroup
	subgroup	colour	Proportion (%)
	subgroup 1	blue	0.319
	subgroup 2	green	0.104
	subgroup 3	blueblack	0.198
	subgroup 4	orange	0.379
		Expected heterozygosity (average diversity within subgroups
	Subgroup	Expected heterozygosity
	subgroup 1	0.0846
	subgroup 2	0.137
	subgroup 3	0.3528
	subgroup 4	0.3541
	Net nucleotide distance (diversity between Subgroups)
		subgroup 1	subgroup 2	subgroup 3	subgroup 4
	subgroup 1	-	0.3179	0.2998	0.2235
	subgroup 2	0.3179	-	0.2683	0.4978
	subgroup 3	0.2998	0.2683	-	0.1383
	subgroup 4	0.2235	0.4978	0.1383	-

## Sheet: Log values
chr number	chr position	Pvalue	logP	Trait
5	2747056	8.72808e-08	7.05908	NSR	NSR=number of storage root
5	2749412	2.30907e-07	6.63656	NSR	MRW=mean root weight
5	2373946	2.30907e-07	6.63656	NSR	RW=root weight per plant
5	2779017	3.01102e-07	6.52129	NSR	HI=harvest index
5	1703470	3.26028e-07	6.48675	NSR	DMC=dry matter content
5	1771722	3.26028e-07	6.48675	NSR
5	2814161	4.72438e-07	6.32565	NSR
5	2315347	4.95641e-07	6.30483	NSR
5	1882450	6.46763e-07	6.18925	NSR
5	2203952	6.63083e-07	6.17843	NSR
5	2878094	9.44379e-07	6.02485	NSR
5	2428647	1.03851e-06	5.98359	NSR
5	5433799	1.07646e-06	5.968	NSR
5	5452096	1.07646e-06	5.968	NSR
5	2483544	1.26538e-06	5.89778	NSR
5	2415039	1.42888e-06	5.84501	NSR
5	1717037	5.96704e-06	5.22424	NSR
5	2795906	7.4691e-06	5.12673	NSR
5	2038204	1.59184e-05	4.7981	NSR
5	2707816	6.06038e-05	4.2175	NSR
7	24233796	1.91089e-05	4.71876	MRW
7	24218174	3.20891e-05	4.49364	MRW
7	24026637	5.42812e-05	4.26535	MRW
7	24587896	5.60968e-05	4.25106	MRW
7	24069335	7.95071e-05	4.09959	MRW
14	5559383	1.90851e-07	6.71931	RW
12	21013081	4.9248e-06	5.30761	HI
14	22383767	5.72897e-06	5.24192	HI
16	5919578	7.01431e-06	5.15402	HI
12	30878311	4.13659e-05	4.38336	HI
6	19503003	4.64098e-05	4.33339	HI
4	22002795	5.53382e-05	4.25697	HI
4	8030252	6.08441e-05	4.21578	HI
16	2709871	6.89848e-05	4.16125	HI
8	365658	7.50756e-05	4.1245	HI
9	28985052	8.10562e-05	4.09121	HI
6	25499662	8.79988e-05	4.05552	HI
15	8844205	8.96348e-05	4.04752	HI
2	11795901	1.54686e-07	6.81055	DMC
2	493861	3.0999e-07	6.50865	DMC
12	3087896	6.51144e-07	6.18632	DMC
11	26380158	1.83954e-06	5.73529	DMC
11	8186457	1.23721e-05	4.90756	DMC
11	11267335	1.70927e-05	4.76719	DMC
2	4260136	1.95707e-05	4.70839	DMC
12	27838817	2.40844e-05	4.61826	DMC
2	2431451	3.60911e-05	4.4426	DMC
8	6940837	3.68495e-05	4.43357	DMC
7	1097601	4.61033e-05	4.33627	DMC
12	987824	5.0266e-05	4.29873	DMC
16	25738810	5.30863e-05	4.27502	DMC
5	541379	6.10831e-05	4.21408	DMC
1	26798508	6.82911e-05	4.16564	DMC
11	26655906	8.27543e-05	4.08221	DMC
1	32119633	9.54241e-05	4.02034	DMC

## Sheet: field sampling
			Measurement of yield related traits in the field
			Debor		Tek bankye
			cassava plants uprooted for traits measurement

## Sheet: SNP data
AlleleID	AlleleSequence	TrimmedSequence	Chrom_Cassava_v8	ChromPos_Cassava_v8	AlnCnt_Cassava_v8	AlnEvalue_Cassava_v8	Chrom_Cassava_v61	ChromPos_Cassava_v61	AlnCnt_Cassava_v61	AlnEvalue_Cassava_v61	SNP	SnpPosition	CallRate	OneRatioRef	OneRatioSnp	FreqHomRef	FreqHomSnp	FreqHets	PICRef	PICSnp	AvgPIC	AvgCountRef	AvgCountSnp	RepAvg	Sika_bankye	IBA_020452	Broni	IBA011368	Bankyehemaa	Debor	Afisiafi	UCC_2001_143	C_1090090	UCC_2001_157	Ucc_2001_454	Duade_kpakpa	O.D	Nyerikogba	C_1083703	KW_2000_148	DMA_2000_070	Doku_duade	C_1011797	SW_2000_006	C_1083724	C_96_1613	BD_96_141	Ucc_2001_461	IBA010040
7120154|F|0-27:T>A-27:T>A	TGCAGATCAAATTCAAGAATCCAAGAATAACGAATTCCCATTTGTCAGTAAAATAAAATTATTACAGAT	TGCAGATCAAATTCAAGAATCCAAGAATAACGAATTCCCATTTGTCAGTAAAATAAAATTATTAC	scaffold08847	266852	1	1.23566e-24	Chromosome17	22484819	1	1.31886e-24	27:T>A	27	1	0.56383	0.957447	0.042553	0.43617	0.521277	0.491852	0.081485	0.286668	21.9697	30.8661	1	1	1	1	2	1	2	1	2	2	2	1	1	2	1	1	2	0	1	2	2	1	0	2	2	1
7111676|F|0-16:G>A-16:G>A	TGCAGAATATACATAGGGAGTATTTAGGCAGCTCAGAGAATCCCTCAATTCCAAGGATGGCCATTTGTC	TGCAGAATATACATAGGGAGTATTTAGGCAGCTCAGAGAATCCCTCAATTCCAAGGATGGCCATTTGTC	scaffold10563	1164322	1	4.73568e-29	Chromosome03	25403263	1	5.18104e-29	16:G>A	16	1	0.861702	0.819149	0.180851	0.138298	0.680851	0.238343	0.296288	0.267316	8.13131	8.55102	1	2	0	1	2	1	2	2	2	0	2	1	0	2	2	2	2	2	1	2	1	2	2	1	2	2
7143159|F|0-17:A>T-17:A>T	TGCAGAATCAGAATTGCACATTTCTTGTGATTTGTTAGATTTCAAAGCCTTTGTTTTCTGCTCTGTTTC	TGCAGAATCAGAATTGCACATTTCTTGTGATTTGTTAGATTTCAAAGCCTTTGTTTTCTGCTCTGTTTC	scaffold03614	3761499	1	4.73568e-29	Chromosome09	27831902	1	5.18104e-29	17:A>T	17	1	1	0.074468	0.925532	0	0.074468	0	0.137845	0.068923	25.1186	14	1	0	0	0	2	0	0	0	0	0	0	0	0	0	0	0	0	0	0	0	0	0	2	0	0	0
13855485|F|0-33:T>G-33:T>G	TGCAGACATTTCCTTGAGAAGGGAAGGGAAGAATGTTCCATCGCACACTACATGTAAATCTCAATCAGA	TGCAGACATTTCCTTGAGAAGGGAAGGGAAGAATGTTCCATCGCACACTACATGTAAATCTCAATCAGA	scaffold08265	3238620	1	4.76931e-24	Chromosome05	4833534	1	5.21783e-24	33:T>G	33	1	1	0.031915	0.968085	0	0.031915	0	0.061793	0.030896	56.4237	28	1	0	0	0	0	0	0	0	0	0	0	0	0	0	0	0	0	0	0	0	0	0	0	0	0	2
7110038|F|0-27:C>A-27:C>A	TGCAGATTCCTGGTTGAAGCAGCTCGACTTCCACCATCCCGATTACAACTTTTTTGTCTATCACACTCC	TGCAGATTCCTGGTTGAAGCAGCTCGACTTCCACCATCCCGATTACAACTTTTTTGTCTATCACACTCC	scaffold03150	20325	1	4.73568e-29	Chromosome01	26626567	1	5.18104e-29	27:C>A	27	1	1	0.244681	0.755319	0	0.244681	0	0.369624	0.184812	15.8051	8.90625	1	0	2	2	0	0	0	2	0	0	0	0	2	0	2	2	0	0	2	0	0	2	2	0	0	0
7139399|F|0-36:G>T-36:G>T	TGCAGCACAGATGTTATAAGCAATCTTCCACATATTGCAATACAAAGGAAACAGTCAAGTCATTTATTA	TGCAGCACAGATGTTATAAGCAATCTTCCACATATTGCAATACAAAGGAAACAGTCAAGTCATTTATTA	scaffold10114	163035	1	4.73568e-29	Chromosome16	24794090	1	5.18104e-29	36:G>T	36	1	0.957447	0.585106	0.414894	0.042553	0.542553	0.081485	0.485514	0.283499	26.5487	18.0462	1	2	0	0	0	2	2	0	2	1	2	0	2	0	0	0	2	0	0	0	0	0	2	2	0	2
7113289|F|0-38:T>C-38:T>C	TGCAGCATCTAAAGGCTTACAAGTATCCATCAACCCTTTTCATTAGGACTTCTTTGAGTAATTGATGTT	TGCAGCATCTAAAGGCTTACAAGTATCCATCAACCCTTTTCATTAGGACTTCTTTGAGTAATTGATGTT	scaffold05979	291922	1	1.0251e-25	Chromosome10	24259746	1	1.1215e-25	38:T>C	38	0.925532	0.988506	0.137931	0.862069	0.011494	0.126437	0.022724	0.237812	0.130268	7.85321	6.28571	1	0	0	2	0	0	0	2	0	0	0	-	0	0	0	0	0	0	0	0	0	0	0	0	0	0
7126508|F|0-11:C>T-11:C>T	TGCAGCCAATCCAAATATTGCTACTCTGTTATGCTGTATGGAACTTGAAGGATTGATTGCCACAATTGA	TGCAGCCAATCCAAATATTGCTACTCTGTTATGCTGTATGGAACTTGAAGGATTGATTGCCACAATTGA	scaffold05494	234895	1	2.2033e-27	Chromosome11	20452145	1	2.4105e-27	11:C>T	11	0.893617	0.880952	0.190476	0.809524	0.119048	0.071429	0.209751	0.30839	0.25907	13.1304	8.78947	1	0	0	0	0	0	0	1	0	2	0	0	-	0	-	0	0	0	-	0	0	1	-	0	0	0
7113806|F|0-9:A>T-9:A>T	TGCAGCTACAGCAATTCTAGGATCTGCCTTTGGAAGAGTAGACTGAGAAATGGCCAAGTCCCGTAAACC	TGCAGCTACAGCAATTCTAGGATCTGCCTTTGGAAGAGTAGACTGAGAAATGGCCAAGTCCCGTAAACC	scaffold01158	136836	1	4.73568e-29	Chromosome07	10830493	1	5.18104e-29	9:A>T	9	1	0.989362	0.170213	0.829787	0.010638	0.159574	0.02105	0.282481	0.151766	6.78632	3.36842	1	0	0	0	0	0	0	0	0	0	0	0	0	0	0	2	0	0	0	0	0	0	2	2	0	0
7108043|F|0-54:G>C-54:G>C	TGCAGCTTCCTAATCTCTTCTCTATATGGAGATTTCTAAGATATAACCTTTTTTGTTTTTCCTGAATAA	TGCAGCTTCCTAATCTCTTCTCTATATGGAGATTTCTAAGATATAACCTTTTTTGTTTTTCCTGAATAA	scaffold04151	215019	1	2.2033e-27	Chromosome04	24644996	1	2.4105e-27	54:G>C	54	1	0.670213	0.808511	0.191489	0.329787	0.478723	0.442055	0.309642	0.375849	12.5132	13.9184	1	0	2	1	1	1	2	1	2	1	2	2	2	2	1	1	2	2	1	2	2	1	0	2	1	2
7132363|F|0-17:A>G-17:A>G	TGCAGGCAAGGCTAGAAAGCTTCTCTCTTTACTCTATTAGTCTTCACTCTCTAGATATCTTTGAAGTAT	TGCAGGCAAGGCTAGAAAGCTTCTCTCTTTACTCTATTAGTCTTCACTCTCTAGATATCTTTGAAGTAT	scaffold08359	2233665	1	4.73568e-29	Chromosome14	6145415	1	5.18104e-29	17:A>G	17	1	1	0.042553	0.957447	0	0.042553	0	0.081485	0.040742	16.517	4.83333	1	0	0	0	0	0	0	2	0	0	0	0	0	0	0	0	0	0	0	0	0	0	2	0	0	0
13856902|F|0-44:T>C-44:T>C	TGCAGGCCCATCTCATGAAAAAGCCAGATAAATAACCAATAGCATTGGAGACACATATCTACAGAGCCC	TGCAGGCCCATCTCATGAAAAAGCCAGATAAATAACCAATAGCATTGGAGACACATATCTACAGAGCCC	scaffold03741	1111666	1	4.73568e-29	Chromosome15	6062598	1	5.18104e-29	44:T>C	44	0.893617	0.702381	0.416667	0.583333	0.297619	0.119048	0.418084	0.486111	0.452098	16.3026	12.9535	1	0	0	0	0	0	1	0	1	0	1	-	2	1	0	0	1	2	0	2	-	0	0	0	0	0
7121088|F|0-12:G>T-12:G>T	TGCAGGGACAGCGTATGCTTCTGAAGAGAAGTTCGTGGGTGTAGATGCTGATATGGCAGGCTGAATGCA	TGCAGGGACAGCGTATGCTTCTGAAGAGAAGTTCGTGGGTGTAGATGCTGATATGGCAGGCTGAATGCA	scaffold04274	93494	1	2.2033e-27	Chromosome02	493795	1	2.4105e-27	12:G>T	12	1	1	0.234043	0.765957	0	0.234043	0	0.358533	0.179267	22.5	12.7143	1	0	0	2	0	2	0	0	0	0	0	0	0	0	2	0	0	2	0	2	2	0	0	0	0	2
7115024|F|0-59:C>T-59:C>T	TGCAGGTGACCTCTGTGGATGACACCAAGCCCTGCTGTAGCACTAAACTTGGCCCAATTCGTGGCCCTG	TGCAGGTGACCTCTGTGGATGACACCAAGCCCTGCTGTAGCACTAAACTTGGCCCAATTCGTGGCCCTG	scaffold02421	466116	1	2.2033e-27	Chromosome03	24360373	1	2.4105e-27	59:C>T	59	0.978723	0.836957	0.728261	0.271739	0.163043	0.565217	0.272921	0.395794	0.334357	10.4062	9	1	2	0	1	2	1	2	2	2	2	2	1	0	2	0	2	2	0	1	0	2	2	2	2	1	0
7114339|F|0-5:G>T-5:G>T	TGCAGGAATAAGTAAGCATGACAAGTACATAAACAAGGCACAAGCAAACAGACAAAGTAATTTGTTATC	TGCAGGAATAAGTAAGCATGACAAGTACATAAACAAGGCACAAGCAAACAGACAAAGTAATTTGTTATC	scaffold06918	52641	1	4.73568e-29	Chromosome13	26656787	1	5.18104e-29	5:G>T	5	0.914894	0.825581	0.395349	0.604651	0.174419	0.22093	0.287994	0.478096	0.383045	12.1868	11.5455	1	0	2	2	1	0	0	1	0	2	0	0	2	0	2	1	0	0	0	0	0	0	0	2	2	-
7123861|F|0-41:T>G-41:T>G	TGCAGTAGGGTTGAAGTGGAGCAAAACATGATCATTGTTTCTGTATAGCTTCAAAACCAAACTGATTTA	TGCAGTAGGGTTGAAGTGGAGCAAAACATGATCATTGTTTCTGTATAGCTTCAAAACCAAACTGATTTA	scaffold00224	194773	1	2.2033e-27	Chromosome10	5047799	1	2.4105e-27	41:T>G	41	1	0.946809	0.12766	0.87234	0.053191	0.074468	0.100724	0.222725	0.161725	29.8468	17.125	1	0	1	0	1	0	0	0	0	0	0	0	0	0	0	0	0	0	0	0	0	2	0	0	2	0
7121335|F|0-13:C>T-13:C>T	TGCAGTAGTAGTTCGCATATGCAGAATTCTAAATTCGCATCTATCATTTTTATTGTGTCGGTAAAGTAC	TGCAGTAGTAGTTCGCATATGCAGAATTCTAAATTCGCATCTATCATTTTTATTGTGTCGGTAAAGTAC	scaffold07229	50778	1	1.0251e-25	Chromosome02	22384031	1	1.1215e-25	13:C>T	13	1	0.893617	0.595745	0.404255	0.106383	0.489362	0.190131	0.481666	0.335899	18.0381	14.3188	1	0	2	2	0	2	2	0	2	2	2	0	0	2	0	0	2	0	1	2	1	0	0	1	0	2
7110967|F|0-37:C>T-37:C>T	TGCAGTCTTTTTTTCATCGATTTTGTTTTTGTTTTGCCTAGAAGAGTTGATCCACTAATGCCTGCAAGT	TGCAGTCTTTTTTTCATCGATTTTGTTTTTGTTTTGCCTAGAAGAGTTGATCCACTAATGCCTGCAAGT	scaffold12794	1154424	1	4.73568e-29	Chromosome06	21201929	1	5.18104e-29	37:C>T	37	1	0.989362	0.138298	0.861702	0.010638	0.12766	0.02105	0.238343	0.129697	18.9487	11.6471	1	0	0	2	0	0	0	2	0	0	0	0	0	0	0	0	0	0	0	2	0	0	0	0	2	1
7127823|F|0-19:G>A-19:G>A	TGCAGTGTAAAATGAGAGTGGATTGCATGGAACCATGCATATAAGTCCATATAGATCCGGTCTAGATAA	TGCAGTGTAAAATGAGAGTGGATTGCATGGAACCATGCATATAAGTCCATATAGATCCGGTCTAGATAA	scaffold05335	817733	1	4.73568e-29	Chromosome17	25762928	1	5.18104e-29	19:G>A	19	1	1	0.042553	0.957447	0	0.042553	0	0.081485	0.040742	27.3136	8.25	1	0	0	0	0	0	0	0	0	0	0	0	0	0	0	0	0	0	0	0	0	0	0	0	0	2
20476237|F|0-5:T>A-5:T>A	TGCAGTTAGAATCTTTGCAGATCATGAATAATATCAGAATAATATACAAGGGACAAGAGATCAAAATAC	TGCAGTTAGAATCTTTGCAGATCATGAATAATATCAGAATAATATACAAGGGACAAGAGATCAAAATAC	scaffold10797	183751	1	4.73568e-29	Chromosome04	26027160	1	5.18104e-29	5:T>A	5	1	0.989362	0.06383	0.93617	0.010638	0.053191	0.02105	0.119511	0.070281	4.66667	3	1	0	0	0	0	0	0	0	0	0	0	0	0	0	0	0	0	0	0	0	0	0	0	0	0	0
13856663|F|0-37:G>A-37:G>A	TGCAGTTAGCTTAGTTTTATTTTCTTTTACAAGATGAGTATGATTTCACAATGACTAAATTTTACAGAT	TGCAGTTAGCTTAGTTTTATTTTCTTTTACAAGATGAGTATGATTTCACAATGACTAAATTTTAC	scaffold03834	49686	1	2.65588e-26	Chromosome05	8616829	1	2.83471e-26	37:G>A	37	0.93617	0.784091	0.647727	0.352273	0.215909	0.431818	0.338585	0.456353	0.397469	20.3409	20.9028	1	1	0	2	0	-	2	2	2	-	2	0	2	2	0	0	2	1	2	2	0	1	2	2	0	0
7116269|F|0-44:A>C-44:A>C	TGCAGTTCACCGAGAGAAGCACAAGAAAGTTTCAAAAACTCCACATTGTGACGTTAGAGAAGAGAAATT	TGCAGTTCACCGAGAGAAGCACAAGAAAGTTTCAAAAACTCCACATTGTGACGTTAGAGAAGAGAAATT	scaffold06871	424976	1	2.2033e-27	Chromosome01	23213828	1	2.4105e-27	44:A>C	44	0.93617	0.852273	0.329545	0.670455	0.147727	0.181818	0.251808	0.44189	0.346849	26.7021	31.7949	1	2	0	0	1	0	0	0	0	1	0	2	0	0	2	1	0	2	2	0	0	1	0	0	1	0
7143055|F|0-32:G>A-32:G>A	TGCAGTTGGAAAATAGCCCCAAAATTTTCTATGCTTGATTGTGCTTTGAATTTGATGCCAGAAACTGAC	TGCAGTTGGAAAATAGCCCCAAAATTTTCTATGCTTGATTGTGCTTTGAATTTGATGCCAGAAACTGAC	scaffold06871	150967	1	2.2033e-27	Chromosome01	23493306	1	2.4105e-27	32:G>A	32	1	0.978723	0.234043	0.765957	0.021277	0.212766	0.041648	0.358533	0.200091	23.8348	15.4231	1	1	0	2	0	2	0	2	0	0	0	0	0	0	0	0	0	0	0	0	0	0	0	0	0	0
7116461|F|0-66:G>A-66:G>A	TGCAGTTGGAACCTCTAAGGGGTCAATTGATCCCTTTAGTGGATTTGTACCATGTAAGCCTCCATCGCT	TGCAGTTGGAACCTCTAAGGGGTCAATTGATCCCTTTAGTGGATTTGTACCATGTAAGCCTCCATCGCT	scaffold02581	97463	1	4.73568e-29	Chromosome11	4407484	1	5.18104e-29	66:G>A	66	1	0.914894	0.404255	0.595745	0.085106	0.319149	0.155727	0.481666	0.318696	6.91509	5.69388	1	1	2	1	0	1	0	2	0	2	0	0	0	0	2	2	0	0	2	0	0	2	1	0	0	0
20488736|F|0-41:A>G-41:A>G	TGCAGTTGTACTTTTTTCTTTTTTTGCCTAATTACACCACAATTCCATTCCTTTACATGAATTTGTGAT	TGCAGTTGTACTTTTTTCTTTTTTTGCCTAATTACACCACAATTCCATTCCTTTACATGAATTTGTGAT	scaffold00560	263926	1	4.73568e-29	Chromosome17	2128595	1	5.18104e-29	41:A>G	41	1	1	0.053191	0.946809	0	0.053191	0	0.100724	0.050362	24.4322	14	1	0	0	0	0	0	0	0	0	0	0	0	0	0	0	0	0	0	0	0	0	0	0	0	0	0
7149105|F|0-28:T>C-28:T>C	TGCAGTTTATCTATATATATTCCTTTATTGAGAAAGTTATATTATGTAGGTAGTACATATCTTACAGAT	TGCAGTTTATCTATATATATTCCTTTATTGAGAAAGTTATATTATGTAGGTAGTACATATCTTAC	scaffold08884	51027	1	2.65588e-26	Chromosome12	236848	1	2.83471e-26	28:T>C	28	1	1	0.06383	0.93617	0	0.06383	0	0.119511	0.059756	13.2034	6.88889	1	0	0	0	0	0	0	0	0	0	0	0	0	0	0	2	0	0	0	0	0	2	0	0	2	0
7107994|F|0-36:G>T-36:G>T	TGCAGCTGAGGTGCCCACCACATGCCTCTCGCTGTGGTCTCTAATTTTTATCAACTTTGTTTTTGTAAA	TGCAGCTGAGGTGCCCACCACATGCCTCTCGCTGTGGTCTCTAATTTTTATCAACTTTGTTTTTGTAAA	scaffold04851	235579	1	4.73568e-29	Chromosome17	18461948	1	5.18104e-29	36:G>T	36	1	0.957447	0.319149	0.680851	0.042553	0.276596	0.081485	0.434586	0.258035	9.24324	6.42105	1	1	0	1	1	0	0	2	0	0	0	0	0	0	2	0	0	0	2	0	2	0	0	0	2	0
7122545|F|0-20:T>A-20:T>A	TGCAGAAAACTCAGTAAAATTTGGAGCCCCTCGTGACACGGACCATCCACAGCTTAGACAGCCTTTACA	TGCAGAAAACTCAGTAAAATTTGGAGCCCCTCGTGACACGGACCATCCACAGCTTAGACAGCCTTTACA	scaffold05019	307729	1	6.12599e-28	Chromosome03	27375110	1	6.7021e-28	20:T>A	20	1	1	0.170213	0.829787	0	0.170213	0	0.282481	0.14124	17.0678	7.86364	1	2	2	0	0	0	0	0	0	0	0	2	0	0	2	0	0	2	0	0	2	2	0	0	0	2
7106860|F|0-60:T>A-60:T>A	TGCAGAAAACTTCAAAACCAGTTCCTTTTTCTTGTCTATTTATAATAATGTTTTCAGTAGTTGTAAAAA	TGCAGAAAACTTCAAAACCAGTTCCTTTTTCTTGTCTATTTATAATAATGTTTTCAGTAGTTGTAAAAA	scaffold01195	180046	1	4.73568e-29	Chromosome17	27224089	1	5.18104e-29	60:T>A	60	1	0.978723	0.095745	0.904255	0.021277	0.074468	0.041648	0.173155	0.107402	17.513	8.91667	1	0	0	0	1	0	0	0	0	2	0	0	0	0	0	0	0	0	0	0	0	0	2	0	0	0
7139057|F|0-29:T>C-29:T>C	TGCAGAACAGGAAGATGTTAGATGACAAATTATGAATTGATGAAAGTAAAATGCCTAGAGATATTGTAA	TGCAGAACAGGAAGATGTTAGATGACAAATTATGAATTGATGAAAGTAAAATGCCTAGAGATATTGTAA	scaffold00069	55679	1	4.73568e-29	Chromosome01	6813278	1	5.18104e-29	29:T>C	29	1	0.989362	0.138298	0.861702	0.010638	0.12766	0.02105	0.238343	0.129697	29.3675	16.8	1	0	0	0	0	2	0	0	0	0	0	0	2	0	0	0	0	0	0	0	0	0	0	0	0	0
7109766|F|0-68:A>G-68:A>G	TGCAGAAGCAGCTTCAGAAGCTTCCTAGACCTTTTCCAGTGAGATATTATAGTATTCAGAATTCAGTTA	TGCAGAAGCAGCTTCAGAAGCTTCCTAGACCTTTTCCAGTGAGATATTATAGTATTCAGAATTCAGTTA		0	0	999	Chromosome18	1562146	1	5.18104e-29	68:A>G	68	0.957447	1	0.066667	0.933333	0	0.066667	0	0.124444	0.062222	27.6195	15.7143	1	0	0	0	0	-	0	0	0	0	0	0	0	0	0	2	0	0	0	0	0	0	0	0	0	0
7125508|F|0-54:G>A-54:G>A	TGCAGAAGGATGATTCCAAATTCAGTGAGATTGTTGTGAATGGTAAAGGCACAGGCCAGAAATTATTTT	TGCAGAAGGATGATTCCAAATTCAGTGAGATTGTTGTGAATGGTAAAGGCACAGGCCAGAAATTATTTT	scaffold11223	49904	1	4.73568e-29	Chromosome11	23571788	1	5.18104e-29	54:G>A	54	0.989362	1	0.182796	0.817204	0	0.182796	0	0.298763	0.149381	27.9231	16.4762	1	0	0	0	0	2	0	0	0	0	0	0	0	0	0	2	0	2	2	0	0	0	0	0	0	2
7146988|F|0-45:T>G-45:T>G	TGCAGAAGTAATGCAGCCTACAAACTGTCGGCCAGCTTCTAATAGTTCAAGAAAATATCGACACTTACA	TGCAGAAGTAATGCAGCCTACAAACTGTCGGCCAGCTTCTAATAGTTCAAGAAAATATCGACACTTACA	scaffold04083	290187	1	1.0251e-25	Chromosome14	5569339	1	1.1215e-25	45:T>G	45	1	0.978723	0.148936	0.851064	0.021277	0.12766	0.041648	0.253508	0.147578	9.18966	4.64286	1	0	0	0	0	0	0	0	0	0	0	0	0	0	0	0	0	0	0	0	0	0	0	0	0	2
20471317|F|0-52:T>C-52:T>C	TGCAGAAGTAGATGAACTAATGAATAGCAGAAGCTGCATATGCTGTGATATTTAGTTTCATGTTTTCAA	TGCAGAAGTAGATGAACTAATGAATAGCAGAAGCTGCATATGCTGTGATATTTAGTTTCATGTTTTCAA	scaffold02815	50676	1	4.73568e-29	Chromosome13	6808407	1	5.18104e-29	52:T>C	52	1	1	0.085106	0.914894	0	0.085106	0	0.155727	0.077863	27.839	13.9	1	0	0	0	2	0	0	0	0	0	0	0	0	0	0	2	0	0	0	0	0	0	0	0	0	0
20110238|F|0-57:C>A-57:C>A	TGCAGAATGTGATTTCTTGCAGGTTCCTGCAAGTCATTTAGTAAGTCTGTAAGATAACTAATTGCAGTT	TGCAGAATGTGATTTCTTGCAGGTTCCTGCAAGTCATTTAGTAAGTCTGTAAGATAACTAATTGCAGTT	scaffold02264	281695	1	2.2033e-27	Chromosome09	29131164	1	2.4105e-27	57:C>A	57	1	0.62766	0.946809	0.053191	0.37234	0.574468	0.467406	0.100724	0.284065	9.52113	12.045	1	2	1	1	2	1	2	1	2	1	2	1	1	1	1	1	2	2	2	0	0	2	2	1	1	2
7111990|F|0-41:C>T-41:C>T	TGCAGACTGTATAGGATCTCGTGACTTCTGTAAACCCTTTGCTAGAGTCCTTATTTGTTTTTCTATAAG	TGCAGACTGTATAGGATCTCGTGACTTCTGTAAACCCTTTGCTAGAGTCCTTATTTGTTTTTCTATAAG	scaffold10563	1422526	1	4.73568e-29	Chromosome03	25151380	1	5.18104e-29	41:C>T	41	1	1	0.106383	0.893617	0	0.106383	0	0.190131	0.095066	17.2542	8	1	0	2	0	0	0	0	0	0	0	0	0	2	0	0	0	0	0	0	0	0	0	0	0	0	0
7143259|F|0-16:A>G-16:A>G	TGCAGAGATCTCAAACAGGCAAACATGTTGTTTCAGGAGATGATTTCTCAGGGTCTGAAACCAAATGGT	TGCAGAGATCTCAAACAGGCAAACATGTTGTTTCAGGAGATGATTTCTCAGGGTCTGAAACCAAATGGT	scaffold01701	544020	1	1.0251e-25	Chromosome06	23362943	1	1.1215e-25	16:A>G	16	1	0.840426	0.62766	0.37234	0.159574	0.468085	0.268221	0.467406	0.367813	13.7551	11.1644	1	0	0	0	1	2	0	2	0	1	0	2	0	2	1	1	0	0	2	2	0	2	2	2	1	0
7146340|F|0-38:G>A-38:G>A	TGCAGAGGCAGCTGTAGATGCTGTATGTACTCATATTCGTAGCAATTATTTCCACATATACTTTATCAT	TGCAGAGGCAGCTGTAGATGCTGTATGTACTCATATTCGTAGCAATTATTTCCACATATACTTTATCAT	scaffold03581	625391	1	4.73568e-29	Chromosome05	1663125	1	5.18104e-29	38:G>A	38	0.978723	1	0.141304	0.858696	0	0.141304	0	0.242675	0.121337	15.1724	7.52941	1	2	0	0	0	0	0	2	0	0	0	0	2	0	0	0	0	0	0	0	0	2	0	0	0	0
7112262|F|0-11:A>G-11:A>G	TGCAGAGTAAAATAAATAGTATATTGAAGACAAGGACCATACAGTATAAGCTATGTAAAGTTACAGATC	TGCAGAGTAAAATAAATAGTATATTGAAGACAAGGACCATACAGTATAAGCTATGTAAAGTTAC	scaffold03667	128805	1	9.31928e-26	Chromosome13	7572966	1	9.94056e-26	11:A>G	11	1	0.957447	0.553191	0.446809	0.042553	0.510638	0.081485	0.494341	0.287913	12.115	11.2656	1	0	0	0	1	2	2	0	2	0	2	2	0	2	0	2	2	2	0	0	2	0	0	0	2	0
7112276|F|0-13:C>A-13:C>A	TGCAGAGTCACAACCATACAAGTTGACTCTAAACTCTAAAGTTACAAGACAGGTTGAGTGATGGAGAAC	TGCAGAGTCACAACCATACAAGTTGACTCTAAACTCTAAAGTTACAAGACAGGTTGAGTGATGGAGAAC	scaffold10963	267691	1	2.2033e-27	Chromosome06	26632563	1	2.4105e-27	13:C>A	13	0.978723	0.978261	0.282609	0.717391	0.021739	0.26087	0.042533	0.405482	0.224008	14.307	9.89655	1	0	0	2	0	2	0	2	0	0	0	0	0	0	0	0	0	0	0	0	0	0	0	0	0	0
7112310|F|0-18:G>T-18:G>T	TGCAGAGTTCAACTAAAAGGGAGCACAGTGAAAGTGCACCGCGTTATGTTCCGAGTCTACCCATCTCCC	TGCAGAGTTCAACTAAAAGGGAGCACAGTGAAAGTGCACCGCGTTATGTTCCGAGTCTACCCATCTCCC	scaffold07012	1280237	1	4.73568e-29	Chromosome18	2510410	1	5.18104e-29	18:G>T	18	1	0.978723	0.255319	0.744681	0.021277	0.234043	0.041648	0.380263	0.210955	18.2241	10.5667	1	0	0	0	0	2	0	0	0	2	0	0	0	0	2	2	0	0	2	0	0	0	0	2	0	2
7129602|F|0-57:T>C-57:T>C	TGCAGATCTCAATCCTCCTGTTCGAGAAAACCAGGTATCTCTCTCGAATTTTCTGCTTGTGCGTGGGTC	TGCAGATCTCAATCCTCCTGTTCGAGAAAACCAGGTATCTCTCTCGAATTTTCTGCTTGTGCGTGGGTC	scaffold03150	143102	1	4.73568e-29	Chromosome01	26783853	1	5.18104e-29	57:T>C	57	1	1	0.042553	0.957447	0	0.042553	0	0.081485	0.040742	19.6186	9.4	1	2	0	0	0	0	0	0	0	0	0	0	0	0	0	0	0	0	0	0	0	0	0	0	0	0
20489027|F|0-41:T>C-41:T>C	TGCAGATGAGCGAGCATTCCTCGGTTTGATTTCAAAATTCTTAGTAAATCAAACCGAGTTACATCGAAT	TGCAGATGAGCGAGCATTCCTCGGTTTGATTTCAAAATTCTTAGTAAATCAAACCGAGTTACATCGAAT	scaffold10689	505047	1	4.73568e-29	Chromosome10	853880	1	5.18104e-29	41:T>C	41	0.989362	0.978495	0.107527	0.892473	0.021505	0.086022	0.042086	0.19193	0.117008	15.9304	11.9231	1	0	0	0	0	0	0	0	0	0	0	0	0	0	0	2	0	0	2	0	0	2	0	0	0	0
7107541|F|0-37:G>T-37:G>T	TGCAGATTTGTGGAATAAGACCAGTATTAGGGCGCGTGGAGGATTTCTCAAAGGAAGTCAAATTGCTGT	TGCAGATTTGTGGAATAAGACCAGTATTAGGGCGCGTGGAGGATTTCTCAAAGGAAGTCAAATTGCTGT	scaffold03252	91680	1	4.73568e-29	Chromosome04	21591921	1	5.18104e-29	37:G>T	37	1	0.914894	0.691489	0.308511	0.085106	0.606383	0.155727	0.426664	0.291195	8.37383	7.3	1	1	0	2	2	0	2	0	2	0	2	0	2	2	0	0	2	0	2	2	2	0	1	1	2	2
7107605|F|0-22:T>C-22:T>C	TGCAGCAATAAGACCAGTGTCATTGCTGATGGCAGATCCAGCTACCAAGAAGTGGAAACCCATCCTAAA	TGCAGCAATAAGACCAGTGTCATTGCTGATGGCAGATCCAGCTACCAAGAAGTGGAAACCCATCCTAAA	scaffold10695	253676	1	4.73568e-29	Chromosome18	13626776	1	5.18104e-29	22:T>C	22	1	0.989362	0.117021	0.882979	0.010638	0.106383	0.02105	0.206655	0.113852	14.2137	7.78571	1	0	2	0	0	0	0	0	0	0	0	0	0	0	0	0	0	0	0	2	0	0	2	0	0	0
7113092|F|0-54:T>A-54:T>A	TGCAGCAGAAGCGAGGTAATGTTCTGAAACCTAATAATTTTCTCCTGTACTCTGTTCATTAGTCACCTT	TGCAGCAGAAGCGAGGTAATGTTCTGAAACCTAATAATTTTCTCCTGTACTCTGTTCATTAGTCACCTT	scaffold03743	159615	1	4.73568e-29	Chromosome12	24354776	1	5.18104e-29	54:T>A	54	1	1	0.159574	0.840426	0	0.159574	0	0.268221	0.13411	13.3983	6.57895	1	0	0	0	0	0	0	0	0	0	0	0	0	2	0	0	0	2	2	0	2	0	0	0	0	2
7122875|F|0-64:T>C-64:T>C	TGCAGCATCCACAACGCCGTTCCTGTTGATCCTAACGTTGACTGCACCAAGTAAGCTAAGAATTTCATT	TGCAGCATCCACAACGCCGTTCCTGTTGATCCTAACGTTGACTGCACCAAGTAAGCTAAGAATTTCATT	scaffold06598	419373	1	4.73568e-29	Chromosome16	390695	1	5.18104e-29	64:T>C	64	1	0.914894	0.553191	0.446809	0.085106	0.468085	0.155727	0.494341	0.325034	15.5321	12.3651	1	0	2	2	2	2	0	2	0	0	0	2	0	0	2	0	0	0	0	2	0	2	1	0	2	2
7107737|F|0-21:A>G-21:A>G	TGCAGCATCTAAAGGATCCATACCTTTAGGAGCAAACCCATCGACTTGGGTTGAACCAGAGTTTCGCTG	TGCAGCATCTAAAGGATCCATACCTTTAGGAGCAAACCCATCGACTTGGGTTGAACCAGAGTTTCGCTG	scaffold08316	563930	1	2.2033e-27	Chromosome04	1542803	1	2.4105e-27	21:A>G	21	1	0.5	0.819149	0.180851	0.5	0.319149	0.5	0.296288	0.398144	20.5172	26.1146	1	1	1	0	0	2	1	0	1	2	1	1	1	1	2	2	1	1	2	1	1	0	0	1	2	2
7126539|F|0-57:G>T-57:G>T	TGCAGCCATTGCTTATGGCTTGGACAAGAAGGGGTCGAGGACTGGGGAGAAAAATGTGCTGATCTTCGA	TGCAGCCATTGCTTATGGCTTGGACAAGAAGGGGTCGAGGACTGGGGAGAAAAATGTGCTGATCTTCGA	scaffold05843	6793	1	2.2033e-27	Chromosome11	7198567	1	2.4105e-27	57:G>T	57	1	1	0.191489	0.808511	0	0.191489	0	0.309642	0.154821	22.8729	11.7619	1	0	0	0	0	0	0	2	0	0	0	0	2	0	0	0	0	0	0	0	0	2	0	0	0	2
7123785|F|0-40:T>C-40:T>C	TGCAGCTACAGCTAGCTAGCTGGCTAGCTTTTCTCGTTCTTGGGCGTTTCTCAAAATTTTACAGATCGG	TGCAGCTACAGCTAGCTAGCTGGCTAGCTTTTCTCGTTCTTGGGCGTTTCTCAAAATTTTAC	scaffold04851	221654	1	5.32832e-23	Chromosome17	18448005	1	5.82929e-23	40:T>C	40	1	0.712766	0.914894	0.085106	0.287234	0.62766	0.409461	0.155727	0.282594	24.4096	25.9906	1	0	1	0	0	1	2	2	2	1	2	2	1	2	2	1	2	0	2	2	2	1	1	1	2	1
7114093|F|0-66:A>T-66:A>T	TGCAGCTGTGGCTTCCAACTTGGCGGACAAACAAACGCAATGGGATTTCAGCTGGTGATTTTCTCTATC	TGCAGCTGTGGCTTCCAACTTGGCGGACAAACAAACGCAATGGGATTTCAGCTGGTGATTTTCTCTATC	scaffold02895	297960	1	4.73568e-29	Chromosome05	26331737	1	5.18104e-29	66:A>T	66	1	0.978723	0.329787	0.670213	0.021277	0.308511	0.041648	0.442055	0.241852	24.5086	15.5128	1	2	0	2	0	0	0	2	0	2	0	2	0	0	2	0	0	0	0	0	2	0	2	0	0	0
7131726|F|0-68:G>T-68:G>T	TGCAGCTTCAGTCAGGCCGTCTCTAGCCCTTTCAAGACCTTCTGTTATATATTGTGCAACCTGCTTATG	TGCAGCTTCAGTCAGGCCGTCTCTAGCCCTTTCAAGACCTTCTGTTATATATTGTGCAACCTGCTTATG	scaffold03581	1087082	1	1.70326e-28	Chromosome05	2120234	1	1.86343e-28	68:G>T	68	1	0.989362	0.446809	0.553191	0.010638	0.43617	0.02105	0.494341	0.257696	9.38462	6.28302	1	2	0	0	0	0	2	0	2	0	2	2	2	2	2	0	2	2	0	0	2	0	0	0	0	0
13856141|F|0-43:T>G-43:T>G	TGCAGCTTTTCATTTTAGATGGACAAAACTACAATAAGATGCCTGCACGTTTGATCTACTTACAGATCG	TGCAGCTTTTCATTTTAGATGGACAAAACTACAATAAGATGCCTGCACGTTTGATCTACTTAC	scaffold04260	68206	1	3.26801e-25	Chromosome05	25878746	1	3.48359e-25	43:T>G	43	1	0.819149	0.829787	0.170213	0.180851	0.648936	0.296288	0.282481	0.289384	9.46667	9.44444	1	1	2	1	0	2	2	2	2	1	2	2	1	1	1	2	2	1	1	1	2	1	0	1	0	2
7114304|F|0-40:C>T-40:C>T	TGCAGGAACTCTTTTGGAACATATAAAATATGTGACCTTTCCTTCTTGTTAGGAATGTCAGGAAGGCGT	TGCAGGAACTCTTTTGGAACATATAAAATATGTGACCTTTCCTTCTTGTTAGGAATGTCAGGAAGGCGT	scaffold04953	180291	1	4.73568e-29	Chromosome06	22627061	1	5.18104e-29	40:C>T	40	1	0.978723	0.478723	0.521277	0.021277	0.457447	0.041648	0.499095	0.270371	20.5351	14.6	1	1	2	2	0	0	2	0	2	0	2	2	0	2	0	0	2	1	0	0	0	0	0	0	0	0
7108138|F|0-63:A>T-63:A>T	TGCAGGAATTCGTCCAGAGAAGCGATTCTCATGTAGATAAAGATACCGGAGCTCGGGAAGATTAGCTAG	TGCAGGAATTCGTCCAGAGAAGCGATTCTCATGTAGATAAAGATACCGGAGCTCGGGAAGATTAGCTAG	scaffold09088	24092	1	4.73568e-29	Chromosome05	9641837	1	5.18104e-29	63:A>T	63	1	0.957447	0.37234	0.62766	0.042553	0.329787	0.081485	0.467406	0.274445	25	15.8667	1	0	0	2	2	1	0	2	0	2	0	2	0	0	0	2	0	0	0	0	2	2	0	0	2	2
7114368|F|0-51:A>G-51:A>G	TGCAGGACAGAAGCAGCATCCTTACCATTGCACCAACAGGAAAAATAAGTTATAGATTTTACAGATCGG	TGCAGGACAGAAGCAGCATCCTTACCATTGCACCAACAGGAAAAATAAGTTATAGATTTTAC	scaffold11786	122702	1	1.14525e-24	Chromosome09	3275887	1	1.25293e-24	51:A>G	51	1	1	0.148936	0.851064	0	0.148936	0	0.253508	0.126754	35.8983	16.6111	1	2	0	0	2	0	0	0	0	2	0	0	0	0	0	0	0	0	0	0	0	0	0	0	2	0
7114965|F|0-53:T>G-53:T>G	TGCAGGTATTCCATTAGTTCATTTTCTCTTCTACAACATTTGAATTTAGTGGTTTGCGTTTTGTTTCGG	TGCAGGTATTCCATTAGTTCATTTTCTCTTCTACAACATTTGAATTTAGTGGTTTGCGTTTTGTTTCGG	scaffold05875	740734	1	2.2033e-27	Chromosome04	26958030	1	2.4105e-27	53:T>G	53	1	0.819149	0.797872	0.202128	0.180851	0.617021	0.296288	0.322544	0.309416	22.5306	21.3587	1	1	2	0	0	2	2	2	2	0	2	2	2	2	2	0	2	0	1	2	2	0	0	1	2	2
20475194|F|0-68:G>A-68:G>A	TGCAGGTGATCTCTAAAGATTCTCTATTGGCTGCACAGGTAAAATTTTCTACTATTAGTAGAGGTTGCG	TGCAGGTGATCTCTAAAGATTCTCTATTGGCTGCACAGGTAAAATTTTCTACTATTAGTAGAGGTTGCG	scaffold07012	1526926	1	4.73568e-29	Chromosome18	2760226	1	5.18104e-29	68:G>A	68	1	1	0.12766	0.87234	0	0.12766	0	0.222725	0.111363	16.4915	6.92857	1	0	0	0	0	0	0	0	0	0	0	0	0	0	0	0	0	0	0	0	0	2	0	0	2	0
13856407|F|0-6:T>C-6:T>C	TGCAGGTTACGACTATTATCTCTGCTCTGCTTGGTTGGGCTGCACCAACTCTGGTAATAATTTAGTAAT	TGCAGGTTACGACTATTATCTCTGCTCTGCTTGGTTGGGCTGCACCAACTCTGGTAATAATTTAGTAAT	scaffold06871	648047	1	2.2033e-27	Chromosome01	23005001	1	2.4105e-27	6:T>C	6	1	1	0.06383	0.93617	0	0.06383	0	0.119511	0.059756	26.983	17.1667	1	0	0	0	0	0	0	0	0	0	0	0	0	0	0	0	0	0	0	0	0	0	0	0	0	0
7115213|F|0-63:C>T-63:C>T	TGCAGGTTTGAATGGGTTTTGAGATTGTGGTTTCAGATGTGTAATTTCTAAGATTTGTGAGATCTATTG	TGCAGGTTTGAATGGGTTTTGAGATTGTGGTTTCAGATGTGTAATTTCTAAGATTTGTGAGATCTATTG	scaffold11882	133221	9	4.73568e-29	Chromosome03	2604514	9	5.18104e-29	63:C>T	63	1	0.978723	0.340426	0.659574	0.021277	0.319149	0.041648	0.449072	0.24536	19.3017	7.18919	1	0	0	2	0	0	0	2	0	2	0	2	0	0	0	0	0	0	0	0	0	0	2	0	0	0
7115438|F|0-49:T>C-49:T>C	TGCAGTAGATATATTTGTCACTCTGCTTATATTCATATATCAGATATTGTTGACTTATTTTACAGATCG	TGCAGTAGATATATTTGTCACTCTGCTTATATTCATATATCAGATATTGTTGACTTATTTTAC	scaffold04002	492069	1	3.26801e-25	Chromosome05	11132553	1	3.48359e-25	49:T>C	49	0.978723	0.98913	0.032609	0.967391	0.01087	0.021739	0.021503	0.063091	0.042297	22.113	20.3333	1	0	0	0	0	0	0	0	0	0	0	0	0	0	0	0	0	0	0	0	0	0	0	0	0	1
7121342|F|0-58:T>C-58:T>C	TGCAGTAGTTTTATTGGCCAAGGCGCTTCTCTCCATCCTGAATCGATTTCCTTTTCCTTTATGTAGTCT	TGCAGTAGTTTTATTGGCCAAGGCGCTTCTCTCCATCCTGAATCGATTTCCTTTTCCTTTATGTAGTCT	scaffold06307	6340	1	4.73568e-29	Chromosome11	14414234	1	5.18104e-29	58:T>C	58	1	0.946809	0.255319	0.744681	0.053191	0.202128	0.100724	0.380263	0.240493	22.6757	14.9375	1	2	2	0	2	0	0	0	0	1	0	0	0	0	0	1	0	0	0	0	0	2	0	2	2	0
7134752|F|0-20:T>G-20:T>G	TGCAGTGCAGCAACCTACTCTGACCTGAAATTAGAAATTTTTTAGCAGAATAAATGCTTGCATGCTTTG	TGCAGTGCAGCAACCTACTCTGACCTGAAATTAGAAATTTTTTAGCAGAATAAATGCTTGCATGCTTTG	scaffold04175	626616	1	4.73568e-29	Chromosome12	1238049	1	5.18104e-29	20:T>G	20	0.989362	1	0.290323	0.709677	0	0.290323	0	0.412071	0.206035	9.7094	5.88235	1	0	0	0	0	0	2	0	2	0	2	0	0	2	0	0	2	0	0	2	0	0	0	2	0	0
15485830|F|0-56:A>G-56:A>G	TGCAGTGCCTAGTCCCTGATTCCATTTTATCTAAAGTCATAACCAATACCAAGTCGAGTTTTTTACAGA	TGCAGTGCCTAGTCCCTGATTCCATTTTATCTAAAGTCATAACCAATACCAAGTCGAGTTTTTTACAGA	scaffold02264	14762	1	7.92447e-27	Chromosome09	29404921	1	8.66972e-27	56:A>G	56	1	0.893617	0.43617	0.56383	0.106383	0.329787	0.190131	0.491852	0.340991	35.6731	24.6429	1	2	1	1	2	2	0	2	0	2	0	2	2	0	1	2	0	0	2	0	0	2	2	0	1	0
7115980|F|0-46:A>G-46:A>G	TGCAGTGCCTTCAATGGTTTTCTCTAGCAAGTAGGTAAGTTTCACAACATATTAGCAGGGTAAAGCAAT	TGCAGTGCCTTCAATGGTTTTCTCTAGCAAGTAGGTAAGTTTCACAACATATTAGCAGGGTAAAGCAAT	scaffold08316	309958	1	4.73568e-29	Chromosome04	1805285	1	5.18104e-29	46:A>G	46	1	0.946809	0.446809	0.553191	0.053191	0.393617	0.100724	0.494341	0.297533	17.0991	11.4314	1	0	0	1	0	2	0	2	0	2	0	0	0	0	2	2	0	0	2	0	0	1	2	0	0	2
7107740|F|0-5:T>C-5:T>C	TGCAGTGTCTGACAACTGGAACATAAACAGGTAATAGCGTCAGAGAATCAAACAGTGCGATGGACCACT	TGCAGTGTCTGACAACTGGAACATAAACAGGTAATAGCGTCAGAGAATCAAACAGTGCGATGGACCACT	scaffold08359	991406	1	4.73568e-29	Chromosome14	7373831	1	5.18104e-29	5:T>C	5	1	1	0.106383	0.893617	0	0.106383	0	0.190131	0.095066	21.9153	10.8571	1	2	0	0	0	2	0	0	0	0	0	0	0	0	0	0	0	0	2	2	0	0	0	0	0	0
7116187|F|0-46:A>G-46:A>G	TGCAGTTACTAAAAATATTTGATTGTTACCTTTGCTTACCTTGCATATTTTGATCAGAATAATTTTCCC	TGCAGTTACTAAAAATATTTGATTGTTACCTTTGCTTACCTTGCATATTTTGATCAGAATAATTTTCCC	scaffold12004	248195	1	4.73568e-29	Chromosome07	23591043	1	5.18104e-29	46:A>G	46	1	0.978723	0.574468	0.425532	0.021277	0.553191	0.041648	0.488909	0.265278	18.7241	11.7101	1	0	2	2	0	2	2	2	2	0	2	2	2	2	2	2	2	0	2	0	2	0	0	0	0	0
7145894|F|0-52:G>A-52:G>A	TGCAGTTCACCACGTGTGACCAATACCTGAAAAACCAGATTGCAAGAACTTCGAATGTTCATGATCCTT	TGCAGTTCACCACGTGTGACCAATACCTGAAAAACCAGATTGCAAGAACTTCGAATGTTCATGATCCTT	scaffold06582	956413	1	4.73568e-29	Chromosome15	8167085	1	5.18104e-29	52:G>A	52	1	1	0.042553	0.957447	0	0.042553	0	0.081485	0.040742	16.9661	8	1	0	0	0	0	0	0	0	0	2	0	0	0	0	0	0	0	0	0	0	0	0	0	0	2	0
7108948|F|0-13:A>C-13:A>C	TGCAGTTTCTTGAAGAAAATCAACCAGATGAAGGTTTCCTGATGTGGAGTGTGGTAGTTGTTCTTGTCT	TGCAGTTTCTTGAAGAAAATCAACCAGATGAAGGTTTCCTGATGTGGAGTGTGGTAGTTGTTCTTGTCT	scaffold08127	169507	1	4.73568e-29	Chromosome16	5848505	1	5.18104e-29	13:A>C	13	1	0.978723	0.468085	0.531915	0.021277	0.446809	0.041648	0.497963	0.269805	10.6724	7.83019	1	0	2	0	0	2	2	0	2	0	2	0	0	2	2	0	2	0	2	0	0	0	0	0	0	0
7116645|F|0-62:G>A-62:G>A	TGCAGTTTGTGAGTCAATGCTAATCCTTTCAAAATGTTGAATGCAGAAGTCTAAAAAGTACCGCAGTTT	TGCAGTTTGTGAGTCAATGCTAATCCTTTCAAAATGTTGAATGCAGAAGTCTAAAAAGTACCGCAGTTT	scaffold01551	140648	1	4.73568e-29	Chromosome15	3606248	1	5.18104e-29	62:G>A	62	1	0.989362	0.297872	0.702128	0.010638	0.287234	0.02105	0.418289	0.21967	26	15.8378	1	2	0	0	2	0	0	0	0	2	0	2	0	0	0	0	0	2	2	0	2	0	2	0	2	2
7108635|F|0-34:C>T-34:C>T	TGCAGTCCGATGGTTAGAAGAGTGAATTTGTCTTCGCTGTTACTTATTAGAAACCTGTTTTTGGAGGAT	TGCAGTCCGATGGTTAGAAGAGTGAATTTGTCTTCGCTGTTACTTATTAGAAACCTGTTTTTGGAGGAT	scaffold05875	1579296	1	2.2033e-27	Chromosome04	27811597	1	2.4105e-27	34:C>T	34	1	0.702128	0.93617	0.06383	0.297872	0.638298	0.418289	0.119511	0.2689	20.6118	25	1	0	1	1	2	2	2	1	2	2	2	2	2	2	1	2	2	1	0	2	2	2	2	2	2	2
7121569|F|0-30:C>G-30:C>G	TGCAGTTAGGAAAAATAAATGCCTGGTCAACAAAGATCACCTTCAAAATATAACTATATTCAGGTTTTA	TGCAGTTAGGAAAAATAAATGCCTGGTCAACAAAGATCACCTTCAAAATATAACTATATTCAGGTTTTA	scaffold03428	11438	1	4.73568e-29	Chromosome06	2590707	1	5.18104e-29	30:C>G	30	1	1	0.287234	0.712766	0	0.287234	0	0.409461	0.204731	23.3729	12.6176	1	0	0	0	2	0	0	2	0	2	0	0	2	0	2	2	0	0	0	0	0	2	0	0	0	0
7125244|F|0-44:T>C-44:T>C	TGCAGAAAAAAAACTTCCCGAATTAGGACGAATCAGTAATTTACTGCGTTTATGAAGCACATTACAGAT	TGCAGAAAAAAAACTTCCCGAATTAGGACGAATCAGTAATTTACTGCGTTTATGAAGCACATTAC	scaffold00068	157652	1	1.60978e-18	Chromosome07	5748011	1	1.71817e-18	44:T>C	44	0.914894	0.976744	0.05814	0.94186	0.023256	0.034884	0.04543	0.109519	0.077474	5.14953	3.28571	1	2	0	0	0	0	0	0	0	0	0	2	0	0	0	0	0	0	0	0	0	0	0	0	0	-
7119668|F|0-31:A>G-31:A>G	TGCAGAAAAAACAATGAGAATGACAATAGCAAGCTTGCAAATTCAGTGGATGTTCTGATTCCAGAGGTT	TGCAGAAAAAACAATGAGAATGACAATAGCAAGCTTGCAAATTCAGTGGATGTTCTGATTCCAGAGGTT	scaffold03049	891730	1	4.73568e-29	Chromosome03	244309	1	5.18104e-29	31:A>G	31	1	0.946809	0.5	0.5	0.053191	0.446809	0.100724	0.5	0.300362	24.5268	17.9828	1	1	0	0	0	0	0	2	0	2	0	0	0	0	0	2	0	0	2	2	2	2	2	2	2	1
20492843|F|0-21:C>T-21:C>T	TGCAGAAAAAAGAAGACGCATCGAGCTTCGTCTGAAACATTGATGAATTTTGAAATATGCCAAAACAGC	TGCAGAAAAAAGAAGACGCATCGAGCTTCGTCTGAAACATTGATGAATTTTGAAATATGCCAAAACAGC	scaffold10563	396051	1	1.0251e-25	Chromosome03	26181743	1	1.1215e-25	21:C>T	21	1	0.755319	0.648936	0.351064	0.244681	0.404255	0.369624	0.455636	0.41263	8.85227	7.78947	1	1	1	2	1	0	0	2	0	1	0	0	1	0	1	2	0	2	0	0	2	2	2	2	1	2
7106848|F|0-20:A>G-20:A>G	TGCAGAAAAAAGACACTGAAAAAGTGCAGAAAAATCATGCTTTTGGACTCGGGAAAAAAAAAAGCTAGA	TGCAGAAAAAAGACACTGAAAAAGTGCAGAAAAATCATGCTTTTGGACTCGGGAAAAAAAAAAGCTAGA	scaffold09798	156947	1	4.73568e-29	Chromosome11	23284351	1	5.18104e-29	20:A>G	20	1	0.925532	0.404255	0.595745	0.074468	0.329787	0.137845	0.481666	0.309756	9.6055	6.97917	1	2	1	0	2	2	0	2	0	1	0	2	0	0	0	0	0	0	0	0	0	2	2	0	2	0
7111011|F|0-6:C>A-6:C>A	TGCAGACAAAATAACAGTTCCACCAAAAAGGGCATATTGGCACAATCCCATGACAAGATAAAATCGAAA	TGCAGACAAAATAACAGTTCCACCAAAAAGGGCATATTGGCACAATCCCATGACAAGATAAAATCGAAA	scaffold07996	99786	1	4.73568e-29	Chromosome12	26950149	1	5.18104e-29	6:C>A	6	1	0.957447	0.393617	0.606383	0.042553	0.351064	0.081485	0.477365	0.279425	19.7207	13.087	1	0	2	0	0	0	0	2	0	2	0	2	0	0	2	1	0	0	0	0	0	1	1	0	2	0
7146411|F|0-21:T>G-21:T>G	TGCAGAAAAAATATAACTCAGTTAGCCAACTCCGGCTAGTTCTTTGAAGATTTTGACATCTTGTATTAT	TGCAGAAAAAATATAACTCAGTTAGCCAACTCCGGCTAGTTCTTTGAAGATTTTGACATCTTGTATTAT	scaffold06030	63118	1	4.73568e-29	Chromosome04	14711659	1	5.18104e-29	21:T>G	21	1	1	0.191489	0.808511	0	0.191489	0	0.309642	0.154821	11.8136	5.6087	1	0	0	0	0	0	0	2	0	2	0	0	0	0	2	0	0	0	0	0	0	2	0	0	2	0
7111012|F|0-17:A>G-17:A>G	TGCAGAAAAAATGGATTACATTATTCCAAACATGAACCCCAGAATCCAATGTCTGGCCATCCTCGATTT	TGCAGAAAAAATGGATTACATTATTCCAAACATGAACCCCAGAATCCAATGTCTGGCCATCCTCGATTT	scaffold08085	141960	1	4.73568e-29	Chromosome02	32364441	1	5.18104e-29	17:A>G	17	1	1	0.074468	0.925532	0	0.074468	0	0.137845	0.068923	8.25424	4.88889	1	0	2	0	0	0	0	0	0	0	0	0	0	0	0	0	0	0	2	0	0	0	0	0	0	2
20408918|F|0-36:A>C-36:A>C	TGCAGAAAAACTAGAGAGAAATCAATCCATGGACATAAATGAAAGTGCAGAAGCATTCATCAAGAATTT	TGCAGAAAAACTAGAGAGAAATCAATCCATGGACATAAATGAAAGTGCAGAAGCATTCATCAAGAATTT	scaffold04269	104773	2	4.73568e-29	Chromosome11	5266755	2	5.18104e-29	36:A>C	36	0.989362	0.978495	0.129032	0.870968	0.021505	0.107527	0.042086	0.224766	0.133426	4.87719	2.76923	1	0	0	0	0	0	0	1	0	0	0	0	2	0	0	0	0	0	0	0	0	2	0	0	0	0
7119673|F|0-23:A>G-23:A>G	TGCAGAAAAAGAGAAGAATCAGCATTTGGGGGAATCAACAAACTGCTTGACTTTGGCCTTTCTAACATA	TGCAGAAAAAGAGAAGAATCAGCATTTGGGGGAATCAACAAACTGCTTGACTTTGGCCTTTCTAACATA	scaffold11581	751953	1	4.73568e-29	Chromosome01	20955289	1	5.18104e-29	23:A>G	23	1	0.957447	0.382979	0.617021	0.042553	0.340426	0.081485	0.472612	0.277048	18.4464	12.4792	1	2	1	1	0	2	0	2	0	2	0	0	2	2	2	0	0	2	0	2	0	0	2	0	0	2
7109656|F|0-57:C>T-57:C>T	TGCAGAAAAAGAGCAAGGAAATGAGGCAGCATTGTGGTAACTAGGATCATAAGCTTTCGTAGCATCAAA	TGCAGAAAAAGAGCAAGGAAATGAGGCAGCATTGTGGTAACTAGGATCATAAGCTTTCGTAGCATCAAA	scaffold12348	38241	1	4.73568e-29	Chromosome05	17024219	1	5.18104e-29	57:C>T	57	1	0.978723	0.680851	0.319149	0.021277	0.659574	0.041648	0.434586	0.238117	11.6035	9.07143	1	2	0	2	2	0	2	2	2	2	2	2	0	2	2	2	2	2	0	2	2	2	2	2	2	2
7111018|F|0-50:G>A-50:G>A	TGCAGAAAAAGAGTAAATTTGGCTAGTATGAGCAGAGAGCGAGGAGACGGGGGAGATATAATAATTACA	TGCAGAAAAAGAGTAAATTTGGCTAGTATGAGCAGAGAGCGAGGAGACGGGGGAGATATAATAATTACA	scaffold07571	105751	1	6.12599e-28	Chromosome01	31935228	1	6.7021e-28	50:G>A	50	1	0.989362	0.053191	0.946809	0.010638	0.042553	0.02105	0.100724	0.060887	19.2821	13.625	1	0	0	0	0	0	0	0	0	2	0	0	0	0	0	0	0	0	0	2	0	0	0	2	0	0
7111020|F|0-18:G>A-18:G>A	TGCAGAAAAAGCCCAACTGCATCCTGCAATTTGCATATAATTCACACAAGATCTAGCAGAGGTTTCAAT	TGCAGAAAAAGCCCAACTGCATCCTGCAATTTGCATATAATTCACACAAGATCTAGCAGAGGTTTCAAT	scaffold06804	38174	1	2.2033e-27	Chromosome16	4342643	1	2.4105e-27	18:G>A	18	1	0.765957	0.744681	0.255319	0.234043	0.510638	0.358533	0.380263	0.369398	11.6322	11.0333	1	0	0	1	2	2	2	2	2	1	2	2	2	0	1	1	2	1	1	2	2	1	1	1	0	0
20110212|F|0-67:G>C-67:G>C	TGCAGAAAAAGCCTACAAAGAAACGGCTAGCACGCACCCGATGGCCATTCCCATGAAAAGAAAACAGGA	TGCAGAAAAAGCCTACAAAGAAACGGCTAGCACGCACCCGATGGCCATTCCCATGAAAAGAAAACAGGA	scaffold04043	51190	1	2.85015e-26	Chromosome02	5709242	1	3.11819e-26	67:G>C	67	1	0.553191	0.829787	0.170213	0.446809	0.382979	0.494341	0.282481	0.388411	8.04545	10.7604	1	2	2	0	0	2	1	0	1	0	1	1	0	2	1	2	1	1	2	1	2	1	2	1	0	2
7111025|F|0-33:T>A-33:T>A	TGCAGAAAAATGACAGCGAATACAACATAAAAATAATACAAATCTTGAGACTGATGACACTCATTTACA	TGCAGAAAAATGACAGCGAATACAACATAAAAATAATACAAATCTTGAGACTGATGACACTCATTTACA	scaffold05875	745192	1	2.85015e-26	Chromosome04	26962488	1	3.11819e-26	33:T>A	33	1	0.968085	0.404255	0.595745	0.031915	0.37234	0.061793	0.481666	0.271729	17.0348	10.4091	1	2	0	0	0	2	0	2	0	0	0	0	0	0	2	0	0	0	2	0	0	0	0	0	2	0
7111027|F|0-48:T>C-48:T>C	TGCAGAAAAATTAGCATTTAGAAACTGATCTACAACACCATTCTCCACTAAATGATTACCCTGATTTAT	TGCAGAAAAATTAGCATTTAGAAACTGATCTACAACACCATTCTCCACTAAATGATTACCCTGATTTAT	scaffold03186	210032	1	4.73568e-29	Chromosome18	7120757	1	5.18104e-29	48:T>C	48	1	0.93617	0.223404	0.776596	0.06383	0.159574	0.119511	0.34699	0.23325	8.88182	7.78261	1	0	2	0	0	1	0	0	0	0	0	0	0	0	0	0	0	0	1	0	0	0	0	0	0	1
13855278|F|0-55:G>A-55:G>A	TGCAGAAAAATTCTTGCATTCAGATGTACAAATTGATTTGTACGCCCAACCAATAGGAAAATAGAATTT	TGCAGAAAAATTCTTGCATTCAGATGTACAAATTGATTTGTACGCCCAACCAATAGGAAAATAGAATTT	scaffold10689	305541	1	1.0251e-25	Chromosome10	656887	1	1.1215e-25	55:G>A	55	0.819149	0.467532	0.571429	0.428571	0.532468	0.038961	0.497892	0.489796	0.493844	12.7333	11.2586	1	1	1	1	0	1	0	1	0	-	0	0	1	0	1	1	0	1	1	1	2	1	0	0	1	-
7146435|F|0-59:A>G-59:A>G	TGCAGAAAAATTGGCATTCACTTTCTTTGGTTGGAAATAATGTCAAAAGAACCAACCATAAGCCAATGA	TGCAGAAAAATTGGCATTCACTTTCTTTGGTTGGAAATAATGTCAAAAGAACCAACCATAAGCCAATGA	scaffold05162	635848	1	4.73568e-29	Chromosome05	23756035	1	5.18104e-29	59:A>G	59	1	1	0.085106	0.914894	0	0.085106	0	0.155727	0.077863	12.9491	5.22222	1	0	0	0	0	0	0	0	0	0	0	0	0	0	0	0	0	0	0	0	0	0	2	0	0	0
7146438|F|0-33:G>A-33:G>A	TGCAGAAAACAACCCCTATTCCTATAGCAACTCGTATGACTGTTTTATCTAACAAACATAAGAAAATGT	TGCAGAAAACAACCCCTATTCCTATAGCAACTCGTATGACTGTTTTATCTAACAAACATAAGAAAATGT	scaffold00318	72982	1	4.73568e-29	Chromosome17	21309626	1	5.18104e-29	33:G>A	33	1	0.957447	0.319149	0.680851	0.042553	0.276596	0.081485	0.434586	0.258035	12.9821	9.51351	1	1	0	1	0	2	0	2	0	0	0	0	0	2	2	2	0	0	0	0	0	0	0	0	0	0
7111035|F|0-42:T>C-42:T>C	TGCAGAAAACAACTTATGACAGGCCAAAGTCAAAAGCAACTTTATTTACAAAAAGCTGTCACTTGAGAA	TGCAGAAAACAACTTATGACAGGCCAAAGTCAAAAGCAACTTTATTTACAAAAAGCTGTCACTTGAGAA	scaffold07012	755990	1	4.73568e-29	Chromosome18	1339729	1	5.18104e-29	42:T>C	42	1	0.957447	0.170213	0.829787	0.042553	0.12766	0.081485	0.282481	0.181983	31.4602	23.9	1	0	0	0	0	1	0	0	0	0	0	0	0	0	2	0	0	0	2	0	0	0	0	2	0	0
7146441|F|0-35:C>G-35:C>G	TGCAGAAAACACAGAATCCACTGAACAAGACTACTCTTGGCCTGCAATTAGGTTTGATTTGCCTCCATA	TGCAGAAAACACAGAATCCACTGAACAAGACTACTCTTGGCCTGCAATTAGGTTTGATTTGCCTCCATA	scaffold10648	25651	1	4.73568e-29	Chromosome17	17213413	1	5.18104e-29	35:C>G	35	1	1	0.053191	0.946809	0	0.053191	0	0.100724	0.050362	10.3729	3.5	1	0	0	0	0	0	0	0	0	0	0	0	0	0	0	0	0	0	0	0	0	2	0	0	0	0
20492857|F|0-39:C>G-39:C>G	TGCAGAAAACACTAATCATTTTTATAACTGCAAGAAACACTAATCATTTTTATCTCCAAGCGTGAAATC	TGCAGAAAACACTAATCATTTTTATAACTGCAAGAAACACTAATCATTTTTATCTCCAAGCGTGAAATC	scaffold10173	652173	1	2.2033e-27	Chromosome15	10538323	1	2.4105e-27	39:C>G	39	1	0.553191	0.925532	0.074468	0.446809	0.478723	0.494341	0.137845	0.316093	11.4923	13.8519	1	0	1	2	2	1	2	1	2	1	2	2	2	0	1	1	2	2	1	1	1	1	2	0	1	1
20470818|F|0-22:G>T-22:G>T	TGCAGAAAACACTGCCCAAGGCGACTAAAGTTCGGTGGGCCATAATAATCCCCTGCTCCCGGTCCCATA	TGCAGAAAACACTGCCCAAGGCGACTAAAGTTCGGTGGGCCATAATAATCCCCTGCTCCCGGTCCCATA	scaffold03264	78685	1	4.73568e-29	Chromosome14	12023396	1	5.18104e-29	22:G>T	22	0.968085	1	0.032967	0.967033	0	0.032967	0	0.06376	0.03188	3.61607	3.66667	1	0	0	0	0	0	0	0	0	0	0	0	0	0	0	0	0	0	0	0	0	0	0	0	0	0
7119680|F|0-45:T>C-45:T>C	TGCAGAAAACAGAAAAGTACCGCAATGAGTAAATATAGTAAAAAATGAGGCATGCACAAACCTAAAGAA	TGCAGAAAACAGAAAAGTACCGCAATGAGTAAATATAGTAAAAAATGAGGCATGCACAAACCTAAAGAA	scaffold12794	1633140	1	7.92447e-27	Chromosome06	20726327	1	8.66972e-27	45:T>C	45	1	0.925532	0.37234	0.62766	0.074468	0.297872	0.137845	0.467406	0.302626	28.2661	21.4773	1	0	0	2	2	0	0	1	0	2	0	0	0	0	2	2	0	0	2	0	0	0	2	0	1	1
7142954|F|0-34:T>C-34:T>C	TGCAGAAAACAGAAGCACATCTACCAATTACTAGTGGTTCTAGATCCAATTCCTATAAAACATTGGAGG	TGCAGAAAACAGAAGCACATCTACCAATTACTAGTGGTTCTAGATCCAATTCCTATAAAACATTGGAGG	scaffold05230	106350	1	2.2033e-27	Chromosome02	14301214	1	2.4105e-27	34:T>C	34	0.978723	0.554348	0.597826	0.402174	0.445652	0.152174	0.494093	0.48086	0.487476	6.59677	8.0137	1	1	1	1	1	1	0	1	0	1	0	2	2	0	1	1	0	2	2	1	2	1	1	0	1	1
20470820|F|0-29:C>G-29:C>G	TGCAGAAAACATCAACCAAAAATTGCATTCACATATTTATTCTAACACCCAAGTACAACACTATTTTTG	TGCAGAAAACATCAACCAAAAATTGCATTCACATATTTATTCTAACACCCAAGTACAACACTATTTTTG	scaffold09231	171479	2	4.73568e-29	Chromosome04	22603639	2	5.18104e-29	29:C>G	29	0.978723	0.978261	0.206522	0.793478	0.021739	0.184783	0.042533	0.327741	0.185137	5.27928	5.64	1	0	0	0	0	0	0	2	0	1	0	0	0	0	2	0	0	0	0	0	0	2	2	0	2	0
7146445|F|0-28:G>T-28:G>T	TGCAGAAAACATGCAAACTAAGAGCAACGCTCACCACAGCAATAAGAAGCAGATCAAAGATTCCTCTCC	TGCAGAAAACATGCAAACTAAGAGCAACGCTCACCACAGCAATAAGAAGCAGATCAAAGATTCCTCTCC	scaffold00977	134983	1	4.73568e-29	Chromosome02	196763	1	5.18104e-29	28:G>T	28	0.93617	0.670455	0.5	0.5	0.329545	0.170455	0.44189	0.5	0.470945	16.6133	11.1818	1	0	0	0	0	2	1	0	1	0	1	-	0	1	0	0	1	2	1	0	2	2	0	1	0	0
13860745|F|0-22:T>A-22:T>A	TGCAGAAAACATGGATATCATATCAAAGACTTTGCTCTCTAATTATGGGTTGTATCATATTTTCCTTAC	TGCAGAAAACATGGATATCATATCAAAGACTTTGCTCTCTAATTATGGGTTGTATCATATTTTCCTTAC	scaffold05335	462375	1	4.73568e-29	Chromosome17	25408358	1	5.18104e-29	22:T>A	22	1	1	0.340426	0.659574	0	0.340426	0	0.449072	0.224536	17.3136	11.85	1	0	0	0	0	0	2	0	2	0	2	0	0	2	0	0	2	2	0	2	2	0	0	0	0	0
7111042|F|0-40:A>C-40:A>C	TGCAGAAAACCTAAAGGCCAATAATGTGTCAGCTCATTAGAATAGGAAAGACAGGTAACATGGACAACT	TGCAGAAAACCTAAAGGCCAATAATGTGTCAGCTCATTAGAATAGGAAAGACAGGTAACATGGACAACT	scaffold00823	164925	1	4.73568e-29	Chromosome08	4141818	1	5.18104e-29	40:A>C	40	1	0.957447	0.414894	0.585106	0.042553	0.37234	0.081485	0.485514	0.283499	13.5625	10.8367	1	2	0	0	0	0	2	0	2	0	2	0	2	1	0	0	2	2	0	0	1	0	0	2	0	0
7106859|F|0-42:T>A-42:T>A	TGCAGAAAACCTATCCAGTCATATATGCCATTGAATTTTTCCTCAAATCAAAATTTTTGAAATTACAGA	TGCAGAAAACCTATCCAGTCATATATGCCATTGAATTTTTCCTCAAATCAAAATTTTTGAAATTACAGA	scaffold07600	4278	1	7.92447e-27	Chromosome09	23478076	1	8.66972e-27	42:T>A	42	1	1	0.191489	0.808511	0	0.191489	0	0.309642	0.154821	19.7627	10.8261	1	0	0	0	0	2	0	0	0	2	0	0	0	0	2	0	0	0	0	0	0	2	0	0	2	2
7109872|F|0-6:G>A-6:G>A	TGCAGAGAACTAAGGTTTCAGGTCAGATAGCTGAGTTGTATGCAGAAGTATCTTCCATGGAAGATTTTG	TGCAGAGAACTAAGGTTTCAGGTCAGATAGCTGAGTTGTATGCAGAAGTATCTTCCATGGAAGATTTTG	scaffold02264	566749	1	2.2033e-27	Chromosome09	28863990	1	2.4105e-27	6:G>A	6	1	0.468085	0.925532	0.074468	0.531915	0.393617	0.497963	0.137845	0.317904	16.8667	22.1296	1	1	2	2	0	2	1	2	1	2	1	2	2	1	2	2	1	1	0	2	2	2	2	1	0	1
13858526|F|0-53:T>A-53:T>A	TGCAGAAAACTACAGGTCTCATGCTTGATTATTGAATAACTTCTACTGAATTCTTGTGTTCACAAATCA	TGCAGAAAACTACAGGTCTCATGCTTGATTATTGAATAACTTCTACTGAATTCTTGTGTTCACAAATCA	scaffold09231	176030	1	4.73568e-29	Chromosome04	22608486	1	5.18104e-29	53:T>A	53	1	1	0.202128	0.797872	0	0.202128	0	0.322544	0.161272	23.9661	13.2	1	0	0	0	0	0	0	2	0	2	0	0	0	0	2	0	0	0	0	0	0	2	2	0	2	0
7111049|F|0-68:G>T-68:G>T	TGCAGAAAACTGGTGGGGAATTTTCTGCAAAATGGTTATTTGTCAGTAAAAACAAGAATAGCATATTCG	TGCAGAAAACTGGTGGGGAATTTTCTGCAAAATGGTTATTTGTCAGTAAAAACAAGAATAGCATATTCG	scaffold05162	275988	1	1.70326e-28	Chromosome05	23422514	1	1.86343e-28	68:G>T	68	1	0.797872	0.755319	0.244681	0.202128	0.553191	0.322544	0.369624	0.346084	5.5914	5.07778	1	1	0	2	2	1	2	2	2	2	2	1	2	2	1	2	2	2	0	0	1	2	1	0	0	1
7111051|F|0-63:T>A-63:T>A	TGCAGAAAACTTGATTTAGAAGATGATAATTCAAGTTATAAAGGATGAAACACTCTATATGTGTGCTTG	TGCAGAAAACTTGATTTAGAAGATGATAATTCAAGTTATAAAGGATGAAACACTCTATATGTGTGCTTG	scaffold03859	143197	1	4.73568e-29	Chromosome17	21086978	1	5.18104e-29	63:T>A	63	1	0.574468	0.787234	0.212766	0.425532	0.361702	0.488909	0.334993	0.411951	13.0735	15.0538	1	1	2	1	0	1	1	2	1	2	1	2	2	1	2	2	1	1	0	1	2	2	0	2	0	0
7119686|F|0-19:T>A-19:T>A	TGCAGAAAAGAAAAAAAAATGGCTGCTTTTCATGTCCGTTCAATCAGTTTGCCCTCTAGATGTCATCCT	TGCAGAAAAGAAAAAAAAATGGCTGCTTTTCATGTCCGTTCAATCAGTTTGCCCTCTAGATGTCATCCT	scaffold01232	29863	1	4.73568e-29	Chromosome12	23711460	1	5.18104e-29	19:T>A	19	1	0.840426	0.712766	0.287234	0.159574	0.553191	0.268221	0.409461	0.338841	8.93	7.11905	1	2	2	2	1	0	2	1	2	0	2	0	2	2	1	0	2	0	2	2	2	0	2	2	0	2
7106862|F|0-31:A>G-31:A>G	TGCAGAAAAGAAACCCTCAACATAATTCCACAAAACCCTCAAAACCTACCCAGACCAGAACTCCACATA	TGCAGAAAAGAAACCCTCAACATAATTCCACAAAACCCTCAAAACCTACCCAGACCAGAACTCCACATA	scaffold08265	2310816	1	1.33546e-19	Chromosome07	24866164	1	1.46105e-19	31:A>G	31	0.808511	0.947368	0.078947	0.921053	0.052632	0.026316	0.099723	0.145429	0.122576	7.33696	6.33333	1	0	0	-	0	-	0	0	0	0	0	0	0	0	0	-	0	0	-	0	0	0	0	0	0	-
7125276|F|0-42:G>A-42:G>A	TGCAGAAAAGATTTTCGAGGAGTGGGAATCCCAGCATCTACAGTACGATGTCCGTGTTCCAAATTTCCT	TGCAGAAAAGATTTTCGAGGAGTGGGAATCCCAGCATCTACAGTACGATGTCCGTGTTCCAAATTTCCT	scaffold03777	103015	1	4.73568e-29	Chromosome09	5563886	1	5.18104e-29	42:G>A	42	0.840426	0.911392	0.101266	0.898734	0.088608	0.012658	0.161513	0.182022	0.171767	4.67816	4.1	1	0	0	0	-	0	0	-	0	1	0	0	-	0	-	0	0	0	0	0	0	-	0	0	1	0
7111058|F|0-35:A>T-35:A>T	TGCAGAAAAGATTTTTGGCGATCAAAAATGGAAAAATCTTGTTGGATTTTTGGCCCCAAATGATTTGGT	TGCAGAAAAGATTTTTGGCGATCAAAAATGGAAAAATCTTGTTGGATTTTTGGCCCCAAATGATTTGGT	scaffold01551	1475805	1	2.2033e-27	Chromosome15	2240409	1	2.4105e-27	35:A>T	35	1	0.638298	0.712766	0.287234	0.361702	0.351064	0.461747	0.409461	0.435604	7.19481	8.09524	1	0	2	2	0	1	1	0	1	0	1	2	1	1	2	0	1	2	0	2	2	2	2	2	0	2
7111059|F|0-22:C>G-22:C>G	TGCAGAAAAGCCTGACCAGGTGCAGACTTTGACTAATGACAGTGATATTTCCATCACGGCAGAAAAAGG	TGCAGAAAAGCCTGACCAGGTGCAGACTTTGACTAATGACAGTGATATTTCCATCACGGCAGAAAAAGG	scaffold06407	85453	1	4.73568e-29	Chromosome10	25881817	1	5.18104e-29	22:C>G	22	1	0.670213	0.617021	0.382979	0.329787	0.287234	0.442055	0.472612	0.457334	21.5316	19.1867	1	2	0	0	1	2	1	0	1	2	1	0	0	1	0	2	1	2	2	1	2	1	2	0	2	0
15485707|F|0-31:C>T-31:C>T	TGCAGAAAAGCTTTGCTTTAGCTGATGAACTCGATTTCTCACCACTCAACTGTATCAACTGTTTTACAG	TGCAGAAAAGCTTTGCTTTAGCTGATGAACTCGATTTCTCACCACTCAACTGTATCAACTGTTTTACAG	scaffold04796	256863	1	2.2033e-27	Chromosome03	1548942	1	2.4105e-27	31:C>T	31	1	1	0.06383	0.93617	0	0.06383	0	0.119511	0.059756	50.6864	26.2857	1	0	0	0	0	0	0	0	0	0	0	0	0	0	0	0	0	0	0	0	0	0	2	0	0	0
7119692|F|0-9:G>A-9:G>A	TGCAGAAAAGGAAGGATTACAGAAATATTGACTAAACAGAAAGAGGTTCACAACAATTTTAGTATTTTA	TGCAGAAAAGGAAGGATTACAGAAATATTGACTAAACAGAAAGAGGTTCACAACAATTTTAGTATTTTA	scaffold08100	171355	1	4.73568e-29	Chromosome09	1295301	1	5.18104e-29	9:G>A	9	1	0.797872	0.893617	0.106383	0.202128	0.691489	0.322544	0.190131	0.256338	26.3085	19.0377	1	2	2	2	1	1	2	2	2	2	2	2	2	0	2	2	2	2	1	1	2	0	2	2	1	2
7146469|F|0-27:C>T-27:C>T	TGCAGAAAAGGGCAAGAGAACGTTATTCTCTGCACAGGAGTTTCTCCTGGGGGCTGACTCTAGCCATCT	TGCAGAAAAGGGCAAGAGAACGTTATTCTCTGCACAGGAGTTTCTCCTGGGGGCTGACTCTAGCCATCT	scaffold02987	109455	1	4.73568e-29	Chromosome14	24563260	1	5.18104e-29	27:C>T	27	1	0.744681	0.542553	0.457447	0.255319	0.287234	0.380263	0.496378	0.438321	8.05556	6.93548	1	0	0	0	0	0	1	0	1	2	1	2	0	2	0	0	1	2	0	2	2	0	0	2	0	2
13858529|F|0-24:A>G-24:A>G	TGCAGAAAAGTGACAAAGTATGTAAATGATATATGTTTTCTGATATTTCATCCTTGTTCCAATTACAGA	TGCAGAAAAGTGACAAAGTATGTAAATGATATATGTTTTCTGATATTTCATCCTTGTTCCAATTACAGA	scaffold10563	420747	1	7.92447e-27	Chromosome03	26156412	1	8.66972e-27	24:A>G	24	1	0.595745	0.787234	0.212766	0.404255	0.382979	0.481666	0.334993	0.40833	12.2857	15.5055	1	0	1	0	0	1	1	0	1	2	1	1	0	1	0	2	1	2	1	1	2	2	0	2	2	2
7111067|F|0-14:G>C-14:G>C	TGCAGAAAAGTTATGACTGAACAAGCTGGTTTTGGTGATGCATCAATCTGGATCACACGATTGGCCGGT	TGCAGAAAAGTTATGACTGAACAAGCTGGTTTTGGTGATGCATCAATCTGGATCACACGATTGGCCGGT	scaffold06688	201132	1	4.73568e-29	Chromosome18	7522950	1	5.18104e-29	14:G>C	14	0.989362	0.903226	0.376344	0.623656	0.096774	0.27957	0.174818	0.469418	0.322118	4.95098	3.37209	1	1	2	1	0	1	0	2	0	0	0	0	0	0	2	2	0	0	0	0	0	0	2	2	0	2
7139012|F|0-22:A>G-22:A>G	TGCAGAAAAGTTATGCAGGCCAAGCATACCTCTCAATAACAAGCTATTTAGATGGTAAGAGTTGGCAAA	TGCAGAAAAGTTATGCAGGCCAAGCATACCTCTCAATAACAAGCTATTTAGATGGTAAGAGTTGGCAAA	scaffold06914	526206	1	1.0251e-25	Chromosome07	1422870	1	1.1215e-25	22:A>G	22	1	0.851064	0.56383	0.43617	0.148936	0.414894	0.253508	0.491852	0.37268	10.5392	8.72059	1	2	1	0	2	2	0	2	0	2	0	2	2	2	1	2	0	2	0	0	2	2	0	0	2	1
7146476|F|0-44:T>C-44:T>C	TGCAGAAAAGTTTCATCATAAGAAAAGCTAAACAAAAAAAAGGGTTATATATTTGAATGCAGACTACTT	TGCAGAAAAGTTTCATCATAAGAAAAGCTAAACAAAAAAAAGGGTTATATATTTGAATGCAGACTACTT	scaffold10551	66357	1	2.2033e-27	Chromosome08	28753327	1	2.4105e-27	44:T>C	44	1	0.968085	0.138298	0.861702	0.031915	0.106383	0.061793	0.238343	0.150068	8.24561	6.0625	1	2	0	0	0	0	0	0	0	0	0	2	0	1	0	0	0	0	0	0	0	0	0	0	0	0
7123638|F|0-49:C>G-49:C>G	TGCAGAAAATAAATCATTCGATAAAGCAGATTCAGAGCAGAATCAAGGTCAAGAAGGAGGCTTACAGAT	TGCAGAAAATAAATCATTCGATAAAGCAGATTCAGAGCAGAATCAAGGTCAAGAAGGAGGCTTAC	scaffold05009	92761	1	1.23566e-24	Chromosome07	25959355	1	1.31886e-24	49:C>G	49	1	0.861702	0.712766	0.287234	0.138298	0.574468	0.238343	0.409461	0.323902	8.51429	7.56098	1	2	2	2	2	2	0	2	0	0	0	0	2	0	2	2	0	2	2	2	2	2	2	0	2	1
13858532|F|0-65:A>T-65:A>T	TGCAGAAAATAACCGACTTGAGAACAAGTTCACTGTGACTTTATGCTAGAAATCAATACCACATAAAAA	TGCAGAAAATAACCGACTTGAGAACAAGTTCACTGTGACTTTATGCTAGAAATCAATACCACATAAAAA	scaffold03614	1991025	1	4.73568e-29	Chromosome09	26053375	1	5.18104e-29	65:A>T	65	0.989362	0.215054	0.946237	0.053763	0.784946	0.16129	0.337611	0.101746	0.219679	16	22.3454	1	-	1	1	1	1	1	1	1	1	1	1	2	1	1	2	1	1	0	2	2	1	1	1	1	1
7111072|F|0-41:G>C-41:G>C	TGCAGAAAATAAGATGTCCTTTGAGAAAAGGTTATCGGAAGGATATATTCTGTAGGCATTACTTTCCAT	TGCAGAAAATAAGATGTCCTTTGAGAAAAGGTTATCGGAAGGATATATTCTGTAGGCATTACTTTCCAT	scaffold08323	4503	1	4.73568e-29	Chromosome01	21717	1	2.4105e-27	41:G>C	41	1	0.914894	0.37234	0.62766	0.085106	0.287234	0.155727	0.467406	0.311566	4.94444	4.06977	1	2	0	2	0	1	0	2	0	0	0	0	1	0	0	2	0	0	0	0	0	2	2	0	0	0
7146479|F|0-17:A>C-17:A>C	TGCAGAAAATAAGCGCAAACATCCATAAATGGCATGATAAACTTTGGTTACTCTAAAATTTGAAGGATC	TGCAGAAAATAAGCGCAAACATCCATAAATGGCATGATAAACTTTGGTTACTCTAAAATTTGAAGGATC	scaffold12794	319203	1	4.73568e-29	Chromosome06	22056089	1	5.18104e-29	17:A>C	17	1	1	0.138298	0.861702	0	0.138298	0	0.238343	0.119172	7.63559	4.58824	1	0	0	2	0	0	0	2	0	0	0	0	0	0	0	0	0	0	0	2	0	0	0	0	2	2
7106866|F|0-21:A>C-21:A>C	TGCAGAAAATAATAGAATGCGACGAGTTGCAGATCTATTCGAGCTCTGTTAGGAGTGCTTTTTCTCATT	TGCAGAAAATAATAGAATGCGACGAGTTGCAGATCTATTCGAGCTCTGTTAGGAGTGCTTTTTCTCATT	scaffold03802	759669	1	2.2033e-27	Chromosome08	29934740	1	2.4105e-27	21:A>C	21	1	0.978723	0.648936	0.351064	0.021277	0.62766	0.041648	0.455636	0.248642	11.2845	7.93421	1	0	0	2	2	0	2	2	2	0	2	0	2	2	2	0	2	2	0	2	2	2	2	0	0	2
7149325|F|0-58:T>G-58:T>G	TGCAGAAAATATAGGTAGAATATGCGGTAATCAAATGCCATAAATATAAATAGAAGCATAATTTTATTA	TGCAGAAAATATAGGTAGAATATGCGGTAATCAAATGCCATAAATATAAATAGAAGCATAATTTTATTA	scaffold06916	1003832	1	4.73568e-29	Chromosome02	10228315	1	5.18104e-29	58:T>G	58	1	1	0.042553	0.957447	0	0.042553	0	0.081485	0.040742	13.2627	8.8	1	0	0	0	0	0	0	0	0	0	0	0	0	0	0	0	0	0	0	0	0	0	0	0	2	0
7106867|F|0-32:A>G-32:A>G	TGCAGAAAATATGAAAATTTTTTGTGAAGAATATTTTCTCCAAAAGAAAGGGAATCTAATTGTCAAAAC	TGCAGAAAATATGAAAATTTTTTGTGAAGAATATTTTCTCCAAAAGAAAGGGAATCTAATTGTCAAAAC	scaffold06028	190030	1	4.73568e-29	Chromosome17	24560888	1	5.18104e-29	32:A>G	32	1	0.946809	0.553191	0.446809	0.053191	0.5	0.100724	0.494341	0.297533	7.97297	6	1	1	2	0	0	2	2	0	2	0	2	2	2	2	2	0	2	0	0	0	0	0	0	1	0	2
7106818|F|0-5:A>G-5:A>G	TGCAGAAAATATGACAAGTTAGATTATCTAAGGCTAAAATGAAAATGTTGTTTTTTCACTCATGCAATG	TGCAGAAAATATGACAAGTTAGATTATCTAAGGCTAAAATGAAAATGTTGTTTTTTCACTCATGCAATG	scaffold00952	21292	2	4.73568e-29	Chromosome11	27349402	2	5.18104e-29	5:A>G	5	1	0.989362	0.37234	0.62766	0.010638	0.361702	0.02105	0.467406	0.244228	13.5603	8.32558	1	0	0	0	2	2	0	0	0	0	0	2	0	0	2	2	0	2	1	0	0	0	0	0	2	2
7146492|F|0-11:A>G-11:A>G	TGCAGAAAATCAGCTAGCTGAAACCAAAGCAGAAATTGCTGTCCTTGCTATGCACAACAACTTTCATAA	TGCAGAAAATCAGCTAGCTGAAACCAAAGCAGAAATTGCTGTCCTTGCTATGCACAACAACTTTCATAA	scaffold03602	325817	1	4.73568e-29	Chromosome09	4727737	1	5.18104e-29	11:A>G	11	0.968085	1	0.054945	0.945055	0	0.054945	0	0.103852	0.051926	4.85088	4.4	1	0	0	0	0	0	0	0	0	0	0	0	0	0	0	0	0	0	0	0	0	0	0	0	0	2
7117836|F|0-53:C>G-53:C>G	TGCAGAAAATCAGGCTCAAAACCAAAGTTCAAGCTGCATTTTTCTGGGTTTTTCTAGTTGTTACAGATC	TGCAGAAAATCAGGCTCAAAACCAAAGTTCAAGCTGCATTTTTCTGGGTTTTTCTAGTTGTTAC	scaffold06609	403566	1	9.31928e-26	Chromosome01	22249176	1	9.94056e-26	53:C>G	53	1	0.904255	0.276596	0.723404	0.095745	0.180851	0.173155	0.400181	0.286668	13.5865	11.7941	1	0	0	0	1	0	0	0	0	1	0	2	0	0	2	1	0	0	2	0	0	1	0	0	1	0
7111083|F|0-35:G>A-35:G>A	TGCAGAAAATCCTAATCGGCCATACTACTACTGTAGGGAAACAAATGTGGAAGCTTTAGGGGTTGGTTC	TGCAGAAAATCCTAATCGGCCATACTACTACTGTAGGGAAACAAATGTGGAAGCTTTAGGGGTTGGTTC	scaffold05703	107860	1	4.73568e-29	Chromosome08	9445141	1	5.18104e-29	35:G>A	35	0.978723	0.73913	0.891304	0.108696	0.26087	0.630435	0.385633	0.193762	0.289698	13.5542	14.8713	1	2	0	1	1	2	2	1	2	-	2	2	1	1	2	-	2	2	1	0	2	0	2	2	1	2
7111090|F|0-61:C>G-61:C>G	TGCAGAAAATGATTCCTGTGATTCACCTCTTGAACCAAATAGTCCTCTATATGGCTTTTCACAGAGAGT	TGCAGAAAATGATTCCTGTGATTCACCTCTTGAACCAAATAGTCCTCTATATGGCTTTTCACAGAGAGT	scaffold07520	1102710	1	4.73568e-29	Chromosome01	24750502	1	5.18104e-29	61:C>G	61	1	0.989362	0.223404	0.776596	0.010638	0.212766	0.02105	0.34699	0.18402	10.6838	5.36667	1	0	2	2	0	0	0	2	0	0	0	0	2	0	2	2	0	0	2	0	0	2	2	0	0	0
7119702|F|0-36:C>A-36:C>A	TGCAGAAAATGGAAAAAGTTATGATAGATGTATCAACAAGGGATCTACAAAAGAGAAAGCTTTGTAGTC	TGCAGAAAATGGAAAAAGTTATGATAGATGTATCAACAAGGGATCTACAAAAGAGAAAGCTTTGTAGTC	scaffold12525	580467	1	2.2033e-27	Chromosome11	2280372	1	2.4105e-27	36:C>A	36	1	0.797872	0.702128	0.297872	0.202128	0.5	0.322544	0.418289	0.370416	14.25	12.1667	1	2	2	2	0	0	2	2	2	2	2	1	1	1	0	0	2	2	1	1	1	0	1	2	0	0
7119703|F|0-5:A>G-5:A>G	TGCAGAAAATGGAATTGCTTGGCTACACCATTGCAGCCCTTGTGCTGACAATTTTGAGGACAGTTCAAG	TGCAGAAAATGGAATTGCTTGGCTACACCATTGCAGCCCTTGTGCTGACAATTTTGAGGACAGTTCAAG	scaffold11224	46254	1	2.2033e-27	Chromosome03	14195860	1	2.4105e-27	5:A>G	5	1	0.93617	0.659574	0.340426	0.06383	0.595745	0.119511	0.449072	0.284292	16.0092	14.4737	1	0	0	2	0	0	2	0	2	1	2	2	0	1	2	0	2	1	2	2	2	0	2	0	0	0
7139015|F|0-32:A>T-32:A>T	TGCAGAAAATGGATCCTGCAATTGAGCTTCACATTTTGACAATGGCAAGCCTGTTGTGTTGGCATGCGT	TGCAGAAAATGGATCCTGCAATTGAGCTTCACATTTTGACAATGGCAAGCCTGTTGTGTTGGCATGCGT	scaffold06916	899438	1	4.73568e-29	Chromosome02	10118833	1	5.18104e-29	32:A>T	32	1	0.968085	0.340426	0.659574	0.031915	0.308511	0.061793	0.449072	0.255432	18.9912	11.65	1	0	0	0	0	0	2	0	2	0	2	1	0	2	0	0	2	1	0	2	0	0	0	0	0	2
7125945|F|0-32:C>T-32:C>T	TGCAGAAAATGTAGCCAAAAACTGTGCATTGACTGACCCAATTGAGGATGAGCCTTCAGAAAATAATGT	TGCAGAAAATGTAGCCAAAAACTGTGCATTGACTGACCCAATTGAGGATGAGCCTTCAGAAAATAATGT	scaffold01701	755504	1	4.73568e-29	Chromosome06	23575959	1	5.18104e-29	32:C>T	32	1	1	0.074468	0.925532	0	0.074468	0	0.137845	0.068923	19.8898	9.44444	1	0	0	2	0	0	0	2	0	0	0	0	0	0	0	0	0	0	0	0	0	0	0	0	0	0
7109677|F|0-60:A>G-60:A>G	TGCAGAAAATGTGGATCCAACCCTAGGTATAGCACCAAAAGGCAAGACTTATGATTTGATAGCCTAAAG	TGCAGAAAATGTGGATCCAACCCTAGGTATAGCACCAAAAGGCAAGACTTATGATTTGATAGCCTAAAG	scaffold00109	351905	1	2.2033e-27	Chromosome01	4273533	1	2.4105e-27	60:A>G	60	0.989362	0.924731	0.268817	0.731183	0.075269	0.193548	0.139207	0.393109	0.266158	25.75	19.6	1	0	0	2	0	0	0	1	0	2	0	2	2	0	1	2	0	0	0	0	2	0	2	2	0	0
7111095|F|0-65:C>A-65:C>A	TGCAGAAAATGTGTGGTAAATTTGCCAGTGCCTCTTCACAAGAATCTGTGTTTACCATTGCATTTCAAA	TGCAGAAAATGTGTGGTAAATTTGCCAGTGCCTCTTCACAAGAATCTGTGTTTACCATTGCATTTCAAA	scaffold00325	492611	1	4.73568e-29	Chromosome15	12819065	1	5.18104e-29	65:C>A	65	1	0.989362	0.202128	0.797872	0.010638	0.191489	0.02105	0.322544	0.171797	21.8547	10.3478	1	0	0	0	0	0	0	2	0	2	0	0	0	0	0	2	0	0	0	0	0	0	2	0	0	0
7119705|F|0-5:A>G-5:A>G	TGCAGAAAATGTTGTGTTAGCTGAAAATGAACTTGTATGCTTTAGTTTCTTGCTTATCTTTTAGAATTT	TGCAGAAAATGTTGTGTTAGCTGAAAATGAACTTGTATGCTTTAGTTTCTTGCTTATCTTTTAGAATTT	scaffold04209	494420	1	4.73568e-29	Chromosome05	26825655	1	5.18104e-29	5:A>G	5	1	1	0.053191	0.946809	0	0.053191	0	0.100724	0.050362	26.2119	14.8	1	0	0	0	0	0	0	0	0	0	0	0	0	0	0	0	0	0	0	0	0	0	0	0	0	0
13855293|F|0-47:C>T-47:C>T	TGCAGAAAATTATACATGGCATCGATTGTGCTTCAGATGAAAATCTTCAGATTTCCTCTGTTCTCAGAT	TGCAGAAAATTATACATGGCATCGATTGTGCTTCAGATGAAAATCTTCAGATTTCCTCTGTTCTCAGAT	scaffold11378	216026	1	2.2033e-27	Chromosome13	4716787	1	2.4105e-27	47:C>T	47	1	1	0.095745	0.904255	0	0.095745	0	0.173155	0.086578	7.77119	3.44444	1	0	0	0	0	0	0	0	0	0	0	0	0	0	0	0	0	0	0	0	0	0	0	0	0	2
7111098|F|0-37:T>A-37:T>A	TGCAGAAAATTCAAAAGATGCTGATTGATGGTATTGATACTTGGGCGCCCAAGATCTCAATCAACAGGG	TGCAGAAAATTCAAAAGATGCTGATTGATGGTATTGATACTTGGGCGCCCAAGATCTCAATCAACAGGG	scaffold09501	334389	1	4.73568e-29	Chromosome03	2171970	1	5.18104e-29	37:T>A	37	1	1	0.042553	0.957447	0	0.042553	0	0.081485	0.040742	9.11017	3.8	1	0	0	0	0	0	0	0	0	0	0	2	0	0	0	0	0	0	0	0	0	0	0	0	0	0
7111099|F|0-62:T>C-62:T>C	TGCAGAAAATTCAAGACAATAGATGTTCCAAGCACCGTGTCAAAAGCTGCACCGGACTTCTGTACTGTA	TGCAGAAAATTCAAGACAATAGATGTTCCAAGCACCGTGTCAAAAGCTGCACCGGACTTCTGTACTGTA	scaffold08315	31386	1	4.73568e-29	Chromosome10	20856	1	5.18104e-29	62:T>C	62	1	0.425532	0.829787	0.170213	0.574468	0.255319	0.488909	0.282481	0.385695	2.98039	4.17347	1	1	0	2	0	2	1	2	1	2	1	1	2	1	1	0	1	1	2	2	1	2	2	1	1	1
7111102|F|0-66:G>C-66:G>C	TGCAGAAAATTGAATTGACACAAGAAAGACATCCTGAGTCAATATTGCCATATGGATCAGTCAATAGAA	TGCAGAAAATTGAATTGACACAAGAAAGACATCCTGAGTCAATATTGCCATATGGATCAGTCAATAGAA	scaffold11495	464635	1	4.73568e-29	Chromosome01	28637477	1	5.18104e-29	66:G>C	66	1	0.946809	0.148936	0.851064	0.053191	0.095745	0.100724	0.253508	0.177116	13.2232	9.52381	1	0	0	0	2	0	0	0	0	1	0	0	0	0	0	2	0	0	0	2	0	2	0	2	2	0
7125299|F|0-56:C>A-56:C>A	TGCAGAAAATTGATGGTGACAATTACCCTGAGGTTTGATGTCTCATTTTACATGATCTGATGAATTCTT	TGCAGAAAATTGATGGTGACAATTACCCTGAGGTTTGATGTCTCATTTTACATGATCTGATGAATTCTT	scaffold08122	295274	1	4.73568e-29	Chromosome11	11656516	1	5.18104e-29	56:C>A	56	1	1	0.159574	0.840426	0	0.159574	0	0.268221	0.13411	23.0085	12.6842	1	0	0	0	0	2	0	2	0	0	0	0	2	0	0	0	0	0	0	0	0	2	0	0	0	0
7106871|F|0-36:A>T-36:A>T	TGCAGAAAATTTAGATTGTCAAGAAAGTCAACATCAAACATTTGTGCAACCCTGACAGATTATTATTAT	TGCAGAAAATTTAGATTGTCAAGAAAGTCAACATCAAACATTTGTGCAACCCTGACAGATTATTATTAT	scaffold10097	125393	1	2.2033e-27	Chromosome07	21109018	1	2.4105e-27	36:A>T	36	1	0.989362	0.255319	0.744681	0.010638	0.244681	0.02105	0.380263	0.200656	10.2906	5.8	1	2	2	0	0	2	0	0	0	0	0	0	0	0	2	0	0	0	0	0	2	0	2	0	0	0
7111104|F|0-19:A>T-19:A>T	TGCAGAAAATTTAGTACCCATTATCAAGTGTCGAGCCATATGGTCTTTCTTCAGTAGCAACCTATTTAT	TGCAGAAAATTTAGTACCCATTATCAAGTGTCGAGCCATATGGTCTTTCTTCAGTAGCAACCTATTTAT	scaffold03581	979197	1	4.73568e-29	Chromosome05	2018080	1	5.18104e-29	19:A>T	19	1	0.87234	0.361702	0.638298	0.12766	0.234043	0.222725	0.461747	0.342236	9.27184	7.39535	1	2	1	1	0	2	0	1	0	2	0	0	0	0	2	0	0	0	0	0	0	2	2	0	0	1
7119708|F|0-10:T>C-10:T>C	TGCAGAAAATTTCAGCCTTCCATTTGCTTACCAACCGTTCTTTGCATAGTTTGAATATGTTTGGATCAA	TGCAGAAAATTTCAGCCTTCCATTTGCTTACCAACCGTTCTTTGCATAGTTTGAATATGTTTGGATCAA	scaffold09086	95261	1	4.73568e-29	Chromosome08	23728987	1	5.18104e-29	10:T>C	10	1	0.989362	0.106383	0.893617	0.010638	0.095745	0.02105	0.190131	0.105591	26.1466	13.0714	1	0	0	0	0	0	0	0	0	2	0	0	0	0	0	1	0	0	0	0	0	2	0	0	2	2
7106872|F|0-17:A>T-17:A>T	TGCAGAAAATTTGCAAGACTGGAACCATCTCATGGGGCAAGCAGAATTCTTTTATCCAACATATACGCG	TGCAGAAAATTTGCAAGACTGGAACCATCTCATGGGGCAAGCAGAATTCTTTTATCCAACATATACGCG	scaffold01551	2040880	1	2.2033e-27	Chromosome15	1699368	1	2.4105e-27	17:A>T	17	1	0.893617	0.755319	0.244681	0.106383	0.648936	0.190131	0.369624	0.279878	6.22857	5.70115	1	0	2	0	0	2	2	2	2	0	2	0	1	2	1	2	2	2	2	2	0	1	2	0	0	2
7111108|F|0-23:C>T-23:C>T	TGCAGAAAATTTTACAGGATATACATATACCATTCCAACATTTTGGCTACGTTACTTTACCAGGAACTT	TGCAGAAAATTTTACAGGATATACATATACCATTCCAACATTTTGGCTACGTTACTTTACCAGGAACTT	scaffold11425	145607	1	2.2033e-27	Chromosome06	25084472	1	2.4105e-27	23:C>T	23	1	0.691489	0.893617	0.106383	0.308511	0.585106	0.426664	0.190131	0.308397	5.7125	5.43396	1	2	2	1	1	2	2	1	2	1	2	0	2	1	2	2	2	2	1	2	1	2	1	0	1	1
7122555|F|0-39:T>C-39:T>C	TGCAGAAACAAAAGCTTGGCCCAAAATACTATGGCACAATAGAACATTTTGGTCTACTTTTATGTTACA	TGCAGAAACAAAAGCTTGGCCCAAAATACTATGGCACAATAGAACATTTTGGTCTACTTTTATGTTACA	scaffold08847	524577	1	6.12599e-28	Chromosome17	22841619	1	6.7021e-28	39:T>C	39	1	1	0.06383	0.93617	0	0.06383	0	0.119511	0.059756	25.1864	11.4286	1	0	0	0	0	0	0	0	0	0	0	0	0	0	0	0	0	0	0	0	0	0	2	0	0	0
7111113|F|0-63:C>T-63:C>T	TGCAGAAACAAAGAAATCAGACTATGGAAACATATAATAGGAATGCCCAACTACCAATTTAGACAGAGA	TGCAGAAACAAAGAAATCAGACTATGGAAACATATAATAGGAATGCCCAACTACCAATTTAGACAGAGA	scaffold03802	629051	1	1.0251e-25	Chromosome08	30058954	1	1.1215e-25	63:C>T	63	1	0.968085	0.351064	0.648936	0.031915	0.319149	0.061793	0.455636	0.258714	11.5	4.825	1	0	0	2	2	0	0	2	0	0	0	0	2	0	2	0	0	0	0	0	0	1	2	0	0	2
7119712|F|0-66:A>T-66:A>T	TGCAGAAACAAAGGATCAAAGGAGAAGCATAAAGGCAAAGCTTGAACACAATGAACAAGGTACATAATA	TGCAGAAACAAAGGATCAAAGGAGAAGCATAAAGGCAAAGCTTGAACACAATGAACAAGGTACATAATA	scaffold09335	238694	1	4.73568e-29	Chromosome13	22704792	1	5.18104e-29	66:A>T	66	1	1	0.074468	0.925532	0	0.074468	0	0.137845	0.068923	27.4661	12.8	1	0	2	0	0	0	0	0	0	0	0	2	0	0	2	0	0	0	0	0	0	0	0	0	0	2
7111115|F|0-32:T>C-32:T>C	TGCAGAAACAAATCTCCATCCCCAAATTTATCTACACCTTTTAGCTTGAGGACTGAAGAAAGAGCTGCA	TGCAGAAACAAATCTCCATCCCCAAATTTATCTACACCTTTTAGCTTGAGGACTGAAGAAAGAGCTGCA	scaffold03245	195016	1	4.73568e-29	Chromosome17	24863862	1	5.18104e-29	32:T>C	32	1	0.87234	0.478723	0.521277	0.12766	0.351064	0.222725	0.499095	0.36091	10	8.29825	1	0	2	2	2	0	0	2	0	0	0	2	0	0	0	2	0	2	1	0	2	1	2	0	1	2
13855296|F|0-14:T>C-14:T>C	TGCAGAAACAAATGTATAGCTATTTGTTATTCGAAGTGAAAATTCAAATTCAAATTCAAATAGACTAAT	TGCAGAAACAAATGTATAGCTATTTGTTATTCGAAGTGAAAATTCAAATTCAAATTCAAATAGACTAAT	scaffold03237	362900	1	4.73568e-29	Chromosome18	3751602	1	5.18104e-29	14:T>C	14	1	1	0.06383	0.93617	0	0.06383	0	0.119511	0.059756	15.2542	10	1	0	0	0	0	0	0	0	0	0	0	0	0	0	0	0	0	0	2	0	0	0	0	0	0	2
7146529|F|0-11:C>A-11:C>A	TGCAGAAACAACTTTATCCAACCTGCAAATAAGAGCTAAAACTCACATGTTTGTATCAATATAATATTG	TGCAGAAACAACTTTATCCAACCTGCAAATAAGAGCTAAAACTCACATGTTTGTATCAATATAATATTG	scaffold08359	419535	1	4.73568e-29	Chromosome14	7957464	1	5.18104e-29	11:C>A	11	1	1	0.148936	0.851064	0	0.148936	0	0.253508	0.126754	6.19492	2.78947	1	2	0	0	0	2	0	0	0	0	0	2	0	0	0	0	0	0	2	2	0	0	0	0	0	0
7111120|F|0-23:T>C-23:T>C	TGCAGAAACAAGAGATCAAGAGATGAACAAAGTTGCAGCTACATCGAAAGATTTTCCGAGGCTTTGTCA	TGCAGAAACAAGAGATCAAGAGATGAACAAAGTTGCAGCTACATCGAAAGATTTTCCGAGGCTTTGTCA	scaffold11279	342816	1	4.73568e-29	Chromosome08	2905823	1	5.18104e-29	23:T>C	23	1	0.648936	0.776596	0.223404	0.351064	0.425532	0.455636	0.34699	0.401313	11.1039	11.6237	1	2	2	2	2	2	1	2	1	2	1	2	2	1	1	0	1	1	0	2	1	0	2	2	0	0
7142973|F|0-17:C>T-17:C>T	TGCAGAAACAAGATTCACAGTTTCTTCATTTCTGACAGAATGCTTTCTGTAGAATATTGAAATCCTGAC	TGCAGAAACAAGATTCACAGTTTCTTCATTTCTGACAGAATGCTTTCTGTAGAATATTGAAATCCTGAC	scaffold09501	583472	1	4.73568e-29	Chromosome03	1951782	1	5.18104e-29	17:C>T	17	0.989362	0.784946	0.752688	0.247312	0.215054	0.537634	0.337611	0.372297	0.354954	5.18681	5.44444	1	1	2	1	2	0	2	2	2	0	2	1	2	2	2	2	2	2	2	2	0	2	1	1	2	1
7111122|F|0-14:A>C-14:A>C	TGCAGAAACAAGGAAGGAGACCCTGATAATCAAAACAACAATACATGACATCATGAACAAGATGATTCA	TGCAGAAACAAGGAAGGAGACCCTGATAATCAAAACAACAATACATGACATCATGAACAAGATGATTCA	scaffold09876	552076	1	2.2033e-27	Chromosome14	3718700	1	2.4105e-27	14:A>C	14	1	0.914894	0.691489	0.308511	0.085106	0.606383	0.155727	0.426664	0.291195	7.89815	7.07407	1	0	0	0	1	2	2	0	2	2	2	2	2	2	0	0	2	2	2	2	2	0	2	0	1	0
7111123|F|0-18:T>A-18:T>A	TGCAGAAACAAGTTACTTTTTTGTATATGAAGCTCACTTTATAATTAGCCAACACTGAATTTTACAGAT	TGCAGAAACAAGTTACTTTTTTGTATATGAAGCTCACTTTATAATTAGCCAACACTGAATTTTAC	scaffold02943	980235	1	2.65588e-26	Chromosome18	293259	1	2.83471e-26	18:T>A	18	0.978723	0.967391	0.26087	0.73913	0.032609	0.228261	0.063091	0.385633	0.224362	24.1261	13.4483	1	0	2	0	0	0	0	2	0	0	0	0	0	0	0	2	0	0	0	0	2	0	2	-	0	0
20498342|F|0-63:C>T-63:C>T	TGCAGAAACAATGAACTAATGAATAACTACTGCATTGGATGAGGACCACACATATTTTGAATACGAGAA	TGCAGAAACAATGAACTAATGAATAACTACTGCATTGGATGAGGACCACACATATTTTGAATACGAGAA	scaffold06916	813801	1	4.73568e-29	Chromosome02	10049611	1	5.18104e-29	63:C>T	63	1	1	0.031915	0.968085	0	0.031915	0	0.061793	0.030896	22.4237	9.2	1	0	0	0	0	0	0	0	0	0	0	2	0	0	0	0	0	2	0	0	0	0	0	0	0	0
7146539|F|0-28:T>A-28:T>A	TGCAGAAACAGAAAAACATCAAACACCCTTTAGGATACTTGACTCTCTTTTGAACACAGATTGTTTCAT	TGCAGAAACAGAAAAACATCAAACACCCTTTAGGATACTTGACTCTCTTTTGAACACAGATTGTTTCAT	scaffold06909	5933	1	4.73568e-29	Chromosome08	15795455	1	5.18104e-29	28:T>A	28	1	1	0.074468	0.925532	0	0.074468	0	0.137845	0.068923	7.73729	4.22222	1	0	0	0	0	0	0	0	0	2	0	0	0	0	0	0	0	0	0	0	0	2	0	0	0	0
7106879|F|0-53:T>A-53:T>A	TGCAGAAACAGAGGGAAAGAAAGTCGGGAATCCCTGCAATTCCATCAGTGCAATCTGGGAATTTACAGA	TGCAGAAACAGAGGGAAAGAAAGTCGGGAATCCCTGCAATTCCATCAGTGCAATCTGGGAATTTACAGA	scaffold07107	26792	1	7.92447e-27	Chromosome14	21691986	1	8.66972e-27	53:T>A	53	1	1	0.06383	0.93617	0	0.06383	0	0.119511	0.059756	26.1102	13.5	1	0	2	0	0	0	0	0	0	0	0	0	2	0	0	0	0	0	0	0	0	0	0	0	0	0
7119546|F|0-36:C>T-36:C>T	TGCAGAAACAGATTAGCATCTGGTTCTCTACAGCTCCTCCAAGAGATCGAATATATCATTACAGATCGG	TGCAGAAACAGATTAGCATCTGGTTCTCTACAGCTCCTCCAAGAGATCGAATATATCATTAC	scaffold09151	418457	1	1.14525e-24	Chromosome07	3034944	1	1.25293e-24	36:C>T	36	1	0.946809	0.670213	0.329787	0.053191	0.617021	0.100724	0.442055	0.27139	13.3304	11.4872	1	0	2	0	2	1	2	2	2	0	2	2	0	2	2	0	2	0	2	2	0	0	2	0	2	0
7119713|F|0-41:A>G-41:A>G	TGCAGAAACAGCAAAACAACCATAACAACAATGGCATTCTCAAGACTCCGTCTTCTTCTCCCATTCTTG	TGCAGAAACAGCAAAACAACCATAACAACAATGGCATTCTCAAGACTCCGTCTTCTTCTCCCATTCTTG	scaffold01551	1830389	1	4.73568e-29	Chromosome15	1906901	1	5.18104e-29	41:A>G	41	1	0.968085	0.308511	0.691489	0.031915	0.276596	0.061793	0.426664	0.244228	21.1304	12.3056	1	2	2	2	2	0	0	2	0	2	0	0	0	0	0	0	0	0	0	0	0	2	0	0	2	0
13855297|F|0-48:T>C-48:T>C	TGCAGAAACAGCATAGCCCTCTCTTTCAAGTACATTATCACCTCCACTTCTACGGCCCATTTCACCCTG	TGCAGAAACAGCATAGCCCTCTCTTTCAAGTACATTATCACCTCCACTTCTACGGCCCATTTCACCCTG	scaffold00435	130349	1	4.73568e-29	Chromosome07	25624578	1	5.18104e-29	48:T>C	48	0.978723	0.402174	0.836957	0.163043	0.597826	0.23913	0.48086	0.272921	0.37689	14.3261	17.7576	1	0	2	1	2	1	1	1	1	2	1	1	1	2	2	1	1	1	1	1	2	1	0	1	2	0
7111128|F|0-13:A>G-13:A>G	TGCAGAAACATAAACAAGTACTCTGTTCAGTGAAGCTTCAAGACTTGAGAAGAGTCTCCACAAATTTAT	TGCAGAAACATAAACAAGTACTCTGTTCAGTGAAGCTTCAAGACTTGAGAAGAGTCTCCACAAATTTAT	scaffold06653	41496	1	4.73568e-29	Chromosome06	2515834	1	5.18104e-29	13:A>G	13	1	0.968085	0.319149	0.680851	0.031915	0.287234	0.061793	0.434586	0.248189	37.0089	25.0278	1	2	0	0	2	0	0	0	0	2	0	0	0	0	0	0	0	0	0	2	0	0	1	0	1	2
7106881|F|0-49:T>C-49:T>C	TGCAGAAACATAAAGAGATTATCAGTAACAGACAACAACAATGAATAAGTACAGCAGAGGTCATATAAT	TGCAGAAACATAAAGAGATTATCAGTAACAGACAACAACAATGAATAAGTACAGCAGAGGTCATATAAT	scaffold09086	62333	1	4.73568e-29	Chromosome08	23697105	1	5.18104e-29	49:T>C	49	0.989362	1	0.043011	0.956989	0	0.043011	0	0.082322	0.041161	6.87179	3.2	1	0	0	0	2	0	0	0	0	0	0	0	0	0	0	0	0	0	0	0	0	0	0	0	0	0
7111132|F|0-49:C>T-49:C>T	TGCAGAAACATGAGCACATGCAAAACGACTACAACCTTTGACATCACTACATGTATTGTCTTGCGAAAA	TGCAGAAACATGAGCACATGCAAAACGACTACAACCTTTGACATCACTACATGTATTGTCTTGCGAAAA	scaffold03512	48402	1	4.73568e-29	Chromosome08	26364192	1	5.18104e-29	49:C>T	49	0.989362	0.989247	0.11828	0.88172	0.010753	0.107527	0.021274	0.208579	0.114927	13.8793	6.21429	1	0	0	0	0	0	0	0	0	2	0	0	0	0	0	2	0	0	0	0	0	0	0	0	2	2
13858540|F|0-39:A>C-39:A>C	TGCAGAAACATGATCTTTGTGTACACATTTGGCTTCTTCAAATTTTCTAGCATCATAACTATAGCAGTT	TGCAGAAACATGATCTTTGTGTACACATTTGGCTTCTTCAAATTTTCTAGCATCATAACTATAGCAGTT	scaffold02307	270624	1	4.73568e-29	Chromosome13	27134249	1	5.18104e-29	39:A>C	39	1	1	0.042553	0.957447	0	0.042553	0	0.081485	0.040742	21.1271	10.3333	1	0	0	0	0	0	0	0	0	2	0	0	0	0	0	0	0	0	0	0	0	2	0	0	0	0
20484533|F|0-12:T>A-12:T>A	TGCAGAAACATGTGGTTCAACCTTCACCCTATATTCATTGTTTTGGTGACAGCTGCAAGAATGATAGTC	TGCAGAAACATGTGGTTCAACCTTCACCCTATATTCATTGTTTTGGTGACAGCTGCAAGAATGATAGTC	scaffold08542	41858	1	4.73568e-29	Chromosome08	3916757	1	5.18104e-29	12:T>A	12	1	1	0.031915	0.968085	0	0.031915	0	0.061793	0.030896	9.76271	8	1	2	0	0	0	0	0	0	0	0	0	0	0	0	0	0	0	0	0	0	0	0	0	0	0	0
7111135|F|0-32:C>A-32:C>A	TGCAGAAACATTTTCATACTTGAAAGGACCTGCTTGTGCAGAACACATATGCCCCTTGAATCTATTCCT	TGCAGAAACATTTTCATACTTGAAAGGACCTGCTTGTGCAGAACACATATGCCCCTTGAATCTATTCCT	scaffold08687	2360	2	4.73568e-29	Chromosome01	26002630	2	5.18104e-29	32:C>A	32	1	1	0.234043	0.765957	0	0.234043	0	0.358533	0.179267	4.98305	4.22581	1	0	2	2	0	0	0	2	0	0	0	0	2	0	2	2	0	0	2	0	0	2	2	0	0	0
7106884|F|0-37:T>C-37:T>C	TGCAGAAACATTTTTGCTGGACCAATCAATCAAATCCTCACTCCTTTGGCTTGCCGCTGGTAAGTTGTT	TGCAGAAACATTTTTGCTGGACCAATCAATCAAATCCTCACTCCTTTGGCTTGCCGCTGGTAAGTTGTT	scaffold00847	2210296	1	4.73568e-29	Chromosome16	28212263	1	5.18104e-29	37:T>C	37	1	1	0.212766	0.787234	0	0.212766	0	0.334993	0.167497	7.72881	5.24	1	0	0	0	2	0	0	2	0	0	0	0	0	0	0	2	0	0	0	0	0	2	0	0	2	0
7111137|F|0-13:G>A-13:G>A	TGCAGAAACCAATGGAGTCAGAGGTAGGGGATGTTGATTCTGCTTTTGTTTTGACTATAGAGAATTGGC	TGCAGAAACCAATGGAGTCAGAGGTAGGGGATGTTGATTCTGCTTTTGTTTTGACTATAGAGAATTGGC	scaffold03241	465890	1	2.2033e-27	Chromosome15	5441052	1	2.4105e-27	13:G>A	13	1	0.914894	0.755319	0.244681	0.085106	0.670213	0.155727	0.369624	0.262675	6.31193	5.86667	1	0	2	0	2	0	2	2	2	2	2	2	0	2	2	2	2	2	2	2	2	2	0	1	2	1
7119718|F|0-67:G>A-67:G>A	TGCAGAAACCAGTTTCTTTCATCATCTATGCAAGCCTCCTCCACCTTGTCTCCTCTTCTTCAGAGCAGG	TGCAGAAACCAGTTTCTTTCATCATCTATGCAAGCCTCCTCCACCTTGTCTCCTCTTCTTCAGAGCAGG	scaffold02936	24862	1	4.73568e-29	Chromosome02	6651771	1	5.18104e-29	67:G>A	67	1	0.808511	0.87234	0.12766	0.191489	0.680851	0.309642	0.222725	0.266184	12.7174	14.9612	1	0	1	1	1	2	2	1	2	1	2	2	1	2	2	2	2	1	2	2	0	2	2	0	1	2
13855299|F|0-53:G>C-53:G>C	TGCAGAAACCATTAGGCTGTCGTGTCTCACAGTGTTGGATGCCATACCTTGATGAATCACATACCTTAC	TGCAGAAACCATTAGGCTGTCGTGTCTCACAGTGTTGGATGCCATACCTTGATGAATCACATACCTTAC	scaffold01127	313831	1	4.73568e-29	Chromosome06	23990692	1	5.18104e-29	53:G>C	53	1	0.957447	0.159574	0.840426	0.042553	0.117021	0.081485	0.268221	0.174853	8.65179	5.25	1	2	2	2	0	0	0	1	0	2	0	0	2	0	0	0	0	0	0	0	0	0	0	0	0	0
7109686|F|0-38:G>A-38:G>A	TGCAGAAACCCATAGAATTTCTCGATGGTTCGTTCAATGGGCCGAATTCTTGGCCCATGATATTGATTT	TGCAGAAACCCATAGAATTTCTCGATGGTTCGTTCAATGGGCCGAATTCTTGGCCCATGATATTGATTT	scaffold01945	579845	1	2.2033e-27	Chromosome03	27940602	1	2.4105e-27	38:G>A	38	1	0.755319	0.861702	0.138298	0.244681	0.617021	0.369624	0.238343	0.303984	14.382	16.38	1	0	0	2	1	1	2	2	2	0	2	2	2	1	0	1	2	0	1	2	2	1	2	2	2	2
13855301|F|0-36:C>T-36:C>T	TGCAGAAACCCTACCACTGGCCTTGTGATCTTTCTTCGTATTGTGTCCTTCAGAGAGCTTCATTTGAAT	TGCAGAAACCCTACCACTGGCCTTGTGATCTTTCTTCGTATTGTGTCCTTCAGAGAGCTTCATTTGAAT	scaffold02915	93582	1	4.73568e-29	Chromosome04	23661961	1	5.18104e-29	36:C>T	36	1	1	0.223404	0.776596	0	0.223404	0	0.34699	0.173495	29.5509	15.1852	1	0	0	0	0	2	0	2	0	2	0	0	0	0	2	0	0	0	0	0	0	0	2	0	2	0
7111144|F|0-33:C>T-33:C>T	TGCAGAAACCGTGAAAACACAAGCTAAGGAACTCGAAGTTGCAGAATCTCAGCAACACTTGGGAAATGC	TGCAGAAACCGTGAAAACACAAGCTAAGGAACTCGAAGTTGCAGAATCTCAGCAACACTTGGGAAATGC	scaffold06855	8236	1	4.73568e-29	Chromosome08	10135534	1	5.18104e-29	33:C>T	33	0.989362	1	0.193548	0.806452	0	0.193548	0	0.312175	0.156087	6.18803	3.45455	1	0	0	0	0	2	0	0	0	0	0	0	0	0	0	0	0	2	0	2	0	0	2	0	0	0
7111145|F|0-30:A>G-30:A>G	TGCAGAAACCTAAGTGATGCAGCTAAATCAATTGAAGATGTTGACTATACAGTAGTTTTGAGAGGGGAT	TGCAGAAACCTAAGTGATGCAGCTAAATCAATTGAAGATGTTGACTATACAGTAGTTTTGAGAGGGGAT	scaffold06631	644692	1	4.73568e-29	Chromosome06	941973	1	5.18104e-29	30:A>G	30	1	1	0.106383	0.893617	0	0.106383	0	0.190131	0.095066	17.3475	9.28571	1	0	0	2	0	0	0	0	0	0	0	2	0	0	0	2	0	0	0	0	0	2	0	0	0	0
7111146|F|0-9:C>A-9:C>A	TGCAGAAACCTCAGCTAATTACTTCTATATATACTACATTATCTCCTTGATCACCCACGAAAAATCCAA	TGCAGAAACCTCAGCTAATTACTTCTATATATACTACATTATCTCCTTGATCACCCACGAAAAATCCAA	scaffold06871	850056	1	2.2033e-27	Chromosome01	22803962	1	2.4105e-27	9:C>A	9	0.946809	0.876404	0.348315	0.651685	0.123596	0.224719	0.216639	0.453983	0.335311	11.0202	10.1	1	2	2	2	0	0	0	2	0	0	0	0	2	1	2	0	0	0	0	1	0	0	1	0	0	2
13851017|F|0-31:A>G-31:A>G	TGCAGAAACCTGAAACATCCAAATCCAATGGATGTTTTAGTTTGTATTCTCTATCATGGCCCATTATAG	TGCAGAAACCTGAAACATCCAAATCCAATGGATGTTTTAGTTTGTATTCTCTATCATGGCCCATTATAG	scaffold06327	404273	1	4.73568e-29	Chromosome04	2489678	1	5.18104e-29	31:A>G	31	0.893617	0.916667	0.154762	0.845238	0.083333	0.071429	0.152778	0.261621	0.2072	5.52632	5.16667	1	0	0	1	0	0	0	1	0	0	0	0	0	0	2	0	0	0	1	0	0	2	-	-	-	0
13858543|F|0-15:G>A-15:G>A	TGCAGAAACGAAAGAGGGATTACCTATATCTGAGCAACAACCAGGACCAATTCTTCATACTTCTGTGAA	TGCAGAAACGAAAGAGGGATTACCTATATCTGAGCAACAACCAGGACCAATTCTTCATACTTCTGTGAA	scaffold03413	49735	1	4.73568e-29	Chromosome13	15124488	1	5.18104e-29	15:G>A	15	1	0.968085	0.617021	0.382979	0.031915	0.585106	0.061793	0.472612	0.267202	17.8348	13.0548	1	0	0	2	0	2	2	2	2	0	2	2	0	2	0	2	2	2	2	0	2	2	0	2	0	0
7146552|F|0-52:T>A-52:T>A	TGCAGAAACGTTGTTATTGGGCTCTTATCCCTCTTATGCTTATGGAAGGGAATGAAAGATATTGAACAC	TGCAGAAACGTTGTTATTGGGCTCTTATCCCTCTTATGCTTATGGAAGGGAATGAAAGATATTGAACAC	scaffold08100	538651	1	4.73568e-29	Chromosome09	1649326	1	5.18104e-29	52:T>A	52	1	1	0.404255	0.595745	0	0.404255	0	0.481666	0.240833	10.4237	6.40426	1	0	0	0	0	0	2	0	2	0	2	0	2	0	0	0	2	2	0	2	2	0	0	2	0	2
7111147|F|0-15:G>A-15:G>A	TGCAGAAACTAAAAAGGGGTTTCTCTTAGTAACAGACAAGAAGGATGGATACTCATTCCTCTATCCATT	TGCAGAAACTAAAAAGGGGTTTCTCTTAGTAACAGACAAGAAGGATGGATACTCATTCCTCTATCCATT	scaffold08265	1415423	1	4.73568e-29	Chromosome07	23962676	1	5.18104e-29	15:G>A	15	0.989362	1	0.11828	0.88172	0	0.11828	0	0.208579	0.10429	9.68376	4.73333	1	2	0	2	0	0	0	0	0	2	0	0	0	0	0	0	0	2	0	0	0	0	0	0	0	0
7111148|F|0-29:T>C-29:T>C	TGCAGAAACTAAAAAGGGATTCCTGTTAGTCACGGACAAGAAGGATGGATACTCATTCCTGTATCCATT	TGCAGAAACTAAAAAGGGATTCCTGTTAGTCACGGACAAGAAGGATGGATACTCATTCCTGTATCCATT	scaffold02998	142489	1	4.73568e-29	Chromosome07	1611568	1	5.18104e-29	29:T>C	29	1	1	0.117021	0.882979	0	0.117021	0	0.206655	0.103327	13.8644	6.14286	1	0	0	0	0	0	0	0	0	0	0	2	0	0	2	0	0	0	0	0	2	0	0	0	0	0
7139028|F|0-57:A>G-57:A>G	TGCAGAAACTAAATAGATACCTTAGGTAACCTAAGTGTGCATGTCAATATGAACAGAAACGGAAAGACA	TGCAGAAACTAAATAGATACCTTAGGTAACCTAAGTGTGCATGTCAATATGAACAGAAACGGAAAGACA	scaffold07819	109113	1	1.0251e-25	Chromosome07	12072449	1	1.1215e-25	57:A>G	57	0.957447	0.755556	0.433333	0.566667	0.244444	0.188889	0.369383	0.491111	0.430247	18.5542	16.6531	1	0	0	1	1	0	0	1	0	2	0	0	1	0	1	1	0	0	0	0	0	1	1	0	1	2
7146555|F|0-64:A>G-64:A>G	TGCAGAAACTAACCTTCTAATATGAAGAGGGAAATTGTCTTATATAGCTCAGGAATTAGTATCTAAATC	TGCAGAAACTAACCTTCTAATATGAAGAGGGAAATTGTCTTATATAGCTCAGGAATTAGTATCTAAATC	scaffold02943	558128	1	4.73568e-29	Chromosome18	715821	1	5.18104e-29	64:A>G	64	1	1	0.06383	0.93617	0	0.06383	0	0.119511	0.059756	7.23077	4.28571	1	0	0	0	0	0	0	0	0	0	0	0	0	0	0	2	0	0	0	0	0	0	0	0	0	0
7109692|F|0-17:A>C-17:A>C	TGCAGAAACTACAATCTACCATCACCTCAGAATTTGCATAATGAAGCAAGCTACCATCCATCAGGGGAT	TGCAGAAACTACAATCTACCATCACCTCAGAATTTGCATAATGAAGCAAGCTACCATCCATCAGGGGAT	scaffold11584	282910	1	2.2033e-27	Chromosome15	11303195	1	2.4105e-27	17:A>C	17	0.968085	0.56044	0.725275	0.274725	0.43956	0.285714	0.492694	0.398503	0.445598	14.746	17.6309	1	0	1	1	2	-	1	2	1	0	1	2	1	1	1	0	1	1	0	1	2	0	2	2	2	0
7125315|F|0-61:G>C-61:G>C	TGCAGAAACTACCTGTTTACATTCTGTACACGGCTACTACATTTTTGGGTCTTACTCTGGTGAAAATTT	TGCAGAAACTACCTGTTTACATTCTGTACACGGCTACTACATTTTTGGGTCTTACTCTGGTGAAAATTT	scaffold11069	196478	1	2.2033e-27	Chromosome08	731985	1	2.4105e-27	61:G>C	61	1	0.978723	0.180851	0.819149	0.021277	0.159574	0.041648	0.296288	0.168968	22.7304	13.4783	1	0	0	1	0	0	0	2	0	0	0	0	2	0	0	2	0	0	2	0	0	2	0	0	0	0
7111150|F|0-20:A>C-20:A>C	TGCAGAAACTCAAATGGAGGAGTGGTAGTGCTGTAGTAGGCCAGGCCATAGTATGCGATGAAGTGGTGA	TGCAGAAACTCAAATGGAGGAGTGGTAGTGCTGTAGTAGGCCAGGCCATAGTATGCGATGAAGTGGTGA	scaffold12794	713172	1	4.73568e-29	Chromosome06	21664958	1	5.18104e-29	20:A>C	20	1	1	0.382979	0.617021	0	0.382979	0	0.472612	0.236306	6.82906	4.6087	1	0	0	0	2	0	2	0	2	2	2	2	0	0	0	0	2	0	0	2	2	0	0	2	0	0
20498357|F|0-52:A>G-52:A>G	TGCAGAAACTCGAGGACATCTAGTCTAACACAACTAAATCATTTGCAAATCCAGCAAGACCAAACAGAT	TGCAGAAACTCGAGGACATCTAGTCTAACACAACTAAATCATTTGCAAATCCAGCAAGACCAAACAGAT	scaffold02815	24133	1	4.73568e-29	Chromosome13	6781611	1	5.18104e-29	52:A>G	52	1	1	0.085106	0.914894	0	0.085106	0	0.155727	0.077863	24.1441	9.8	1	0	0	0	2	0	0	0	0	0	0	0	0	0	0	2	0	0	0	0	0	0	0	0	0	0
7106893|F|0-38:G>A-38:G>A	TGCAGAAACTGAAAAAGTGAAAGAATATGACAGCAATGGATTGTATCTTATTATCAGCAACATGGAAGC	TGCAGAAACTGAAAAAGTGAAAGAATATGACAGCAATGGATTGTATCTTATTATCAGCAACATGGAAGC	scaffold03049	69130	1	1.0251e-25	Chromosome03	1069175	1	1.1215e-25	38:G>A	38	1	0.957447	0.265957	0.734043	0.042553	0.223404	0.081485	0.390448	0.235967	25.0885	17.2903	1	0	2	2	2	0	0	0	0	1	0	0	0	0	0	0	0	0	0	0	0	2	0	0	2	0
7111158|F|0-8:T>C-8:T>C	TGCAGAAATTGAGCAGCAAGCCTGCGGCAGTTTCCCATCTTCTTTTCTCCTTTCTTTTGTGATTTTGTC	TGCAGAAATTGAGCAGCAAGCCTGCGGCAGTTTCCCATCTTCTTTTCTCCTTTCTTTTGTGATTTTGTC	scaffold04274	72199	7	2.2033e-27	Chromosome02	473058	10	2.4105e-27	8:T>C	8	0.851064	0.25	0.85	0.15	0.75	0.1	0.375	0.255	0.315	3.25	3.20988	1	1	2	1	0	1	1	1	1	-	1	1	1	1	1	0	1	1	1	1	1	1	1	1	0	1
7106898|F|0-18:A>G-18:A>G	TGCAGAAACTTCAGATTCATGCGACAGCTTTTATAATCCGTTTCGTTTAGCTAAACGTCCGAGGCTTGA	TGCAGAAACTTCAGATTCATGCGACAGCTTTTATAATCCGTTTCGTTTAGCTAAACGTCCGAGGCTTGA	scaffold03542	376859	1	4.73568e-29	Chromosome15	7659536	1	5.18104e-29	18:A>G	18	1	0.925532	0.574468	0.425532	0.074468	0.5	0.137845	0.488909	0.313377	12.5045	9.54545	1	0	2	0	0	0	2	2	2	0	2	2	0	0	2	0	2	0	2	0	2	0	2	2	0	0
13861854|F|0-30:C>A-30:C>A	TGCAGAAACTTTAGCTCCTGATCAATCCACCGACAACTACTGGAGCATGGAGGATCTCTGGTCCATGCA	TGCAGAAACTTTAGCTCCTGATCAATCCACCGACAACTACTGGAGCATGGAGGATCTCTGGTCCATGCA	scaffold03749	2207	1	4.73568e-29	Chromosome17	25376759	1	5.18104e-29	30:C>A	30	1	1	0.340426	0.659574	0	0.340426	0	0.449072	0.224536	28.0085	16.9	1	0	0	0	0	0	2	0	2	0	2	0	0	2	0	0	2	2	0	2	2	0	0	0	0	0
7111166|F|0-37:C>A-37:C>A	TGCAGAAACTTTATCATTCCATTTCTGATGTGGACAGCAAACATCACCTTGGTTGTGTTATTTATGGCA	TGCAGAAACTTTATCATTCCATTTCTGATGTGGACAGCAAACATCACCTTGGTTGTGTTATTTATGGCA	scaffold06484	45383	1	4.73568e-29	Chromosome13	24726275	1	5.18104e-29	37:C>A	37	1	0.87234	0.734043	0.265957	0.12766	0.606383	0.222725	0.390448	0.306587	14.3168	13.3448	1	2	0	2	0	2	2	0	2	1	2	1	2	2	0	0	2	2	1	1	2	2	0	1	2	0
7111167|F|0-38:T>C-38:T>C	TGCAGAAACTTTCAGCGTGGAAGGTCATTTTCTTCTTCTTATAGTTCACTTCATCTTGCTGTAATTCAA	TGCAGAAACTTTCAGCGTGGAAGGTCATTTTCTTCTTCTTATAGTTCACTTCATCTTGCTGTAATTCAA	scaffold01840	59758	1	4.73568e-29	Chromosome02	30686524	1	5.18104e-29	38:T>C	38	1	0.925532	0.62766	0.37234	0.074468	0.553191	0.137845	0.467406	0.302626	26.9159	23.6164	1	2	2	0	0	2	2	0	2	0	2	0	0	0	0	1	2	2	0	1	2	2	1	2	0	2
7111169|F|0-17:G>A-17:G>A	TGCAGAAACTTTTCCCCGACACCACCGCAACCGGCTCCTCCGCCGCCCCCCGCGGTCTGGCCATTTGGA	TGCAGAAACTTTTCCCCGACACCACCGCAACCGGCTCCTCCGCCGCCCCCCGCGGTCTGGCCATTTGGA	scaffold05629	22254	1	4.73568e-29	Chromosome09	23242163	1	5.18104e-29	17:G>A	17	1	0.87234	0.819149	0.180851	0.12766	0.691489	0.222725	0.296288	0.259507	10.88	10.8367	1	1	2	2	1	2	2	2	2	0	2	1	0	2	2	2	2	2	1	1	1	2	2	2	0	2
7111170|F|0-52:T>C-52:T>C	TGCAGAAACTTTTTGACCCTTGCTTGATTTTCTTTCTCCGCTTTGTCTGCGCTATAGACGCGGTAGAGT	TGCAGAAACTTTTTGACCCTTGCTTGATTTTCTTTCTCCGCTTTGTCTGCGCTATAGACGCGGTAGAGT	scaffold06633	8025	1	4.73568e-29	Chromosome14	1639451	1	5.18104e-29	52:T>C	52	1	0.989362	0.223404	0.776596	0.010638	0.212766	0.02105	0.34699	0.18402	7.25641	3.84615	1	0	2	0	2	0	0	2	0	0	0	0	2	0	0	0	0	0	0	0	0	0	2	0	0	0
7111171|F|0-39:A>G-39:A>G	TGCAGAAAGAAAATTCATATGAAATCACTTTGTGATTTCAATGTTCCGTATACTCTTTACGCATTACAG	TGCAGAAAGAAAATTCATATGAAATCACTTTGTGATTTCAATGTTCCGTATACTCTTTACGCATTACAG	scaffold06914	831406	1	2.2033e-27	Chromosome07	1736779	1	2.4105e-27	39:A>G	39	1	0.968085	0.680851	0.319149	0.031915	0.648936	0.061793	0.434586	0.248189	17.3772	13.3374	1	2	0	1	2	2	2	2	2	2	2	2	2	0	0	2	2	0	2	2	0	2	2	2	2	0
7125327|F|0-36:A>G-36:A>G	TGCAGAAAGAAAGAGAGAGAGGCCCACATAGAGATAAAAGACAATGGCTACTCCCACTGCTTCCAAATG	TGCAGAAAGAAAGAGAGAGAGGCCCACATAGAGATAAAAGACAATGGCTACTCCCACTGCTTCCAAATG	scaffold03602	130931	1	4.73568e-29	Chromosome09	4924691	1	5.18104e-29	36:A>G	36	1	1	0.031915	0.968085	0	0.031915	0	0.061793	0.030896	25.7881	14	1	0	0	0	0	0	0	0	0	0	0	0	0	0	0	2	0	0	0	0	0	0	0	0	0	0
7125328|F|0-18:C>T-18:C>T	TGCAGAAAGAAAGCATCACACTCTTGAACGTTGCTAGATCACTGATGTTTCCTTCAAAGTTGCCTCTTG	TGCAGAAAGAAAGCATCACACTCTTGAACGTTGCTAGATCACTGATGTTTCCTTCAAAGTTGCCTCTTG	scaffold06206	43062	1	4.73568e-29	Chromosome11	26342049	1	5.18104e-29	18:C>T	18	1	1	0.085106	0.914894	0	0.085106	0	0.155727	0.077863	23.4068	14.8	1	0	0	0	0	2	0	0	0	0	0	0	0	0	0	0	0	0	2	0	0	0	0	0	0	0
7106902|F|0-56:G>T-56:G>T	TGCAGAAAGAAGATAAAAAGGGAAGCAGAGAAGTCTCTTGCATCACTAAAGCAGAAGGATTCTTCTTCT	TGCAGAAAGAAGATAAAAAGGGAAGCAGAGAAGTCTCTTGCATCACTAAAGCAGAAGGATTCTTCTTCT	scaffold07520	2582330	1	4.73568e-29	Chromosome01	26203838	1	5.18104e-29	56:G>T	56	1	0.585106	0.819149	0.180851	0.414894	0.404255	0.485514	0.296288	0.390901	10.507	11.1368	1	2	2	0	2	1	1	0	1	0	1	1	2	2	2	0	1	1	2	1	2	0	2	2	0	2
7111174|F|0-17:C>G-17:C>G	TGCAGAAAGAAGGGAAACGTCAGATCAATACTGAACAACATAGTCCAATGCTCTAAACAAGTGTTCATT	TGCAGAAAGAAGGGAAACGTCAGATCAATACTGAACAACATAGTCCAATGCTCTAAACAAGTGTTCATT	scaffold11378	331308	1	4.73568e-29	Chromosome13	4601336	1	5.18104e-29	17:C>G	17	1	0.957447	0.648936	0.351064	0.042553	0.606383	0.081485	0.455636	0.26856	24.9821	22.1842	1	0	2	2	0	0	2	0	2	0	2	0	2	1	0	2	2	2	2	2	2	2	0	1	0	0
7139031|F|0-14:A>G-14:A>G	TGCAGAAAGAGACTATGAGAGCTCTATACGATGGAAGTCTCTTTGAACACTTGGAGAAGCAAAGAGCAT	TGCAGAAAGAGACTATGAGAGCTCTATACGATGGAAGTCTCTTTGAACACTTGGAGAAGCAAAGAGCAT	scaffold10173	997165	1	4.73568e-29	Chromosome15	10187694	1	5.18104e-29	14:A>G	14	1	0.989362	0.531915	0.468085	0.010638	0.521277	0.02105	0.497963	0.259507	10.7863	8.60656	1	0	0	0	0	0	2	2	2	0	2	0	0	2	2	0	2	2	2	2	2	0	0	0	0	0
7119731|F|0-9:A>G-9:A>G	TGCAGAAAGAGAGGCTGCTTTGGCTAGAGTGCGGGAGGAGAAAGCCATATCACTTGGTGCTGAACCTGA	TGCAGAAAGAGAGGCTGCTTTGGCTAGAGTGCGGGAGGAGAAAGCCATATCACTTGGTGCTGAACCTGA	scaffold04274	116181	2	4.73568e-29	Chromosome02	516472	2	5.18104e-29	9:A>G	9	1	1	0.053191	0.946809	0	0.053191	0	0.100724	0.050362	13.5593	7.33333	1	0	0	0	0	0	0	0	0	0	0	0	0	0	0	0	0	0	0	0	0	2	0	0	0	0
20484578|F|0-11:C>T-11:C>T	TGCAGAAAGAGCGGATGGGAATAATTTTCCATAATTACAGTAATAAATTCTGTTGTCCACAGAACATGC	TGCAGAAAGAGCGGATGGGAATAATTTTCCATAATTACAGTAATAAATTCTGTTGTCCACAGAACATGC		0	0	999	Chromosome18	5241226	1	5.18104e-29	11:C>T	11	1	1	0.042553	0.957447	0	0.042553	0	0.081485	0.040742	23.0424	8.8	1	0	0	0	0	0	0	0	0	0	0	0	0	0	0	0	0	0	0	0	0	0	2	0	0	0
7146594|F|0-68:C>G-68:C>G	TGCAGAAAGAGCTCAAAGCTACGAAATTGGAACATAAGGTTTATAGATCGATCCAAACCCTCAGTCCGC	TGCAGAAAGAGCTCAAAGCTACGAAATTGGAACATAAGGTTTATAGATCGATCCAAACCCTCAGTCCGC	scaffold11668	78651	1	4.73568e-29	Chromosome08	28141430	1	5.18104e-29	68:C>G	68	1	0.914894	0.276596	0.723404	0.085106	0.191489	0.155727	0.400181	0.277954	8.29907	6.27273	1	0	0	1	0	0	0	1	0	2	0	0	2	0	2	2	0	0	0	0	0	2	1	0	0	0
13858551|F|0-13:A>C-13:A>C	TGCAGAAAGATCAAAGTAATTCAATTACCGGTTATAACTAGACTTGTTTTCGAGACAGCAACCAGTTAC	TGCAGAAAGATCAAAGTAATTCAATTACCGGTTATAACTAGACTTGTTTTCGAGACAGCAACCAGTTAC	scaffold09761	350532	1	1.70326e-28	Chromosome09	764457	1	1.86343e-28	13:A>C	13	1	1	0.06383	0.93617	0	0.06383	0	0.119511	0.059756	17.8729	9.85714	1	0	0	0	0	0	0	0	0	0	0	0	0	0	0	0	0	0	0	0	0	0	2	0	0	0
7106906|F|0-35:A>G-35:A>G	TGCAGAAAGATCAACGAATCACCCCTTACAGAAACATCAAAGAATCACCACTGCTTGTGGTAACAAAAT	TGCAGAAAGATCAACGAATCACCCCTTACAGAAACATCAAAGAATCACCACTGCTTGTGGTAACAAAAT	scaffold03363	160442	1	2.2033e-27	Chromosome13	24043722	1	2.4105e-27	35:A>G	35	1	0.957447	0.595745	0.404255	0.042553	0.553191	0.081485	0.481666	0.281575	7.67257	4.95588	1	2	0	0	2	2	2	0	2	0	2	2	0	2	0	0	2	2	0	0	0	0	2	1	0	0
7146596|F|0-62:C>A-62:C>A	TGCAGAAAGATCATTGAGAAAGAAATTCAGAACAAAATAAAAATAAAATGAGACAATTAGACCATGAAA	TGCAGAAAGATCATTGAGAAAGAAATTCAGAACAAAATAAAAATAAAATGAGACAATTAGACCATGAAA	scaffold00341	308214	1	4.73568e-29	Chromosome14	1861065	1	5.18104e-29	62:C>A	62	0.957447	1	0.033333	0.966667	0	0.033333	0	0.064444	0.032222	10.1947	7.75	1	0	0	-	0	0	0	0	0	0	0	0	0	0	0	0	0	0	0	0	0	0	2	0	0	0
7111190|F|0-27:C>T-27:C>T	TGCAGAAAGCAAAATTGATTCATAAGACAACTTACATCCGTCAAATATCCAAAAATCTAAAAATACCCA	TGCAGAAAGCAAAATTGATTCATAAGACAACTTACATCCGTCAAATATCCAAAAATCTAAAAATACCCA	scaffold00847	1102119	1	2.2033e-27	Chromosome16	27110031	1	2.4105e-27	27:C>T	27	1	0.978723	0.106383	0.893617	0.021277	0.085106	0.041648	0.190131	0.11589	7.65217	3.76923	1	0	2	0	0	0	0	0	0	0	0	0	0	0	0	1	0	0	0	0	0	2	2	0	0	0
13859736|F|0-14:C>T-14:C>T	TGCAGAAAGCAATGCGACTCTCAAAATTCCTCTAGGAGAAGTTTATAAGGAACTTGAATATGTGCGACA	TGCAGAAAGCAATGCGACTCTCAAAATTCCTCTAGGAGAAGTTTATAAGGAACTTGAATATGTGCGACA		0	0	999	Chromosome12	3530424	1	5.18104e-29	14:C>T	14	1	0.978723	0.468085	0.531915	0.021277	0.446809	0.041648	0.497963	0.269805	26.0783	19.5965	1	0	2	2	0	0	2	2	2	2	2	0	0	2	1	0	2	0	0	2	0	0	0	2	2	0
7111191|F|0-17:C>T-17:C>T	TGCAGAAAGCAATTTTGCTGTGGATGCAAACTCCATTGGAACGAGATCTTACCGGCCTGAGGCAAGGTC	TGCAGAAAGCAATTTTGCTGTGGATGCAAACTCCATTGGAACGAGATCTTACCGGCCTGAGGCAAGGTC	scaffold08799	823854	1	4.73568e-29	Chromosome17	23236170	1	5.18104e-29	17:C>T	17	1	1	0.074468	0.925532	0	0.074468	0	0.137845	0.068923	16.161	9.33333	1	0	0	0	0	0	0	0	0	2	0	0	0	0	0	0	0	0	0	2	0	0	0	0	0	0
7111222|F|0-9:T>C-9:T>C	TGCAGAAAGTATAATGTGGATACCTTCGAAAGCACAATTGGAATGTAGAAACCCTACTTAGTTTTCGTC	TGCAGAAAGTATAATGTGGATACCTTCGAAAGCACAATTGGAATGTAGAAACCCTACTTAGTTTTCGTC	scaffold06916	1500186	1	2.2033e-27	Chromosome02	10722841	1	2.4105e-27	9:T>C	9	1	0.925532	0.319149	0.680851	0.074468	0.244681	0.137845	0.434586	0.286215	6.02752	4.18421	1	2	0	2	2	1	0	0	0	2	0	0	0	0	2	0	0	0	0	0	0	0	1	0	2	1
7106911|F|0-42:A>T-42:A>T	TGCAGAAAGCATCAAACTTTCTGATTGCTGCAAGAATTTTCTATTTGATCGAAAAACTATTACCTTTAC	TGCAGAAAGCATCAAACTTTCTGATTGCTGCAAGAATTTTCTATTTGATCGAAAAACTATTACCTTTAC	scaffold06801	211279	2	2.2033e-27	Chromosome01	1226705	2	2.4105e-27	42:A>T	42	1	0.191489	0.968085	0.031915	0.808511	0.159574	0.309642	0.061793	0.185718	13.84	21.1316	1	1	1	1	1	1	1	2	1	2	1	1	1	1	0	2	1	1	1	1	2	2	2	1	1	1
7143010|F|0-21:A>C-21:A>C	TGCAGAAAGCCAGAAGAACAAATGACAGCTTAGAGAAAATCTATAAAAAGCATTTCATATTCTGAGGGA	TGCAGAAAGCCAGAAGAACAAATGACAGCTTAGAGAAAATCTATAAAAAGCATTTCATATTCTGAGGGA	scaffold06916	1100405	1	2.2033e-27	Chromosome02	10324196	1	2.4105e-27	21:A>C	21	0.978723	0.934783	0.293478	0.706522	0.065217	0.228261	0.121928	0.414698	0.268313	6.50467	4.6	1	2	0	1	2	0	0	2	0	2	0	0	0	0	2	0	0	0	0	0	0	0	1	0	1	2
7122569|F|0-37:C>T-37:C>T	TGCAGAAAGCCGTGGCAAAATATTAGGGGAAAGGCCTCTAGAAAGAAGCTTGAAAGATTTACAGATCGG	TGCAGAAAGCCGTGGCAAAATATTAGGGGAAAGGCCTCTAGAAAGAAGCTTGAAAGATTTAC	scaffold00889	301028	1	1.14525e-24	Chromosome05	11620048	1	1.25293e-24	37:C>T	37	1	0.914894	0.617021	0.382979	0.085106	0.531915	0.155727	0.472612	0.314169	25.3454	20.6528	1	2	2	0	2	0	2	0	2	0	2	2	2	2	2	2	2	0	0	0	2	0	0	0	2	0
7106912|F|0-47:T>A-47:T>A	TGCAGAAAGCTGGGGGAAGATTGCATGCAGTAGACAATCCTCCCCATTCCCCACCCTTGCAAAGAGGGG	TGCAGAAAGCTGGGGGAAGATTGCATGCAGTAGACAATCCTCCCCATTCCCCACCCTTGCAAAGAGGGG	scaffold09120	467129	1	4.73568e-29	Chromosome17	20167514	1	5.18104e-29	47:T>A	47	1	0.978723	0.5	0.5	0.021277	0.478723	0.041648	0.5	0.270824	20.4649	13.4516	1	0	2	0	0	2	2	2	2	0	2	0	2	2	0	2	2	2	0	2	2	1	0	1	0	2
7128136|F|0-12:C>G-12:C>G	TGCAGAAAGGACCCCATTTTATCACTAATAAAATTATGAGTAGACTCCCTGTCAATTAGGACAATACTC	TGCAGAAAGGACCCCATTTTATCACTAATAAAATTATGAGTAGACTCCCTGTCAATTAGGACAATACTC	scaffold10183	59576	1	4.73568e-29	Chromosome16	19793558	1	5.18104e-29	12:C>G	12	0.893617	1	0.071429	0.928571	0	0.071429	0	0.132653	0.066327	6.3619	5.71429	1	0	0	0	0	0	0	0	0	0	0	0	0	0	0	-	0	2	0	0	0	-	0	0	0	0
7143015|F|0-16:T>C-16:T>C	TGCAGAAAGGAGTCAGTGTCATTAGACCTGAAGCAACTGAGTTCAAGGCATCAAGCGGGAAGTTTGAAT	TGCAGAAAGGAGTCAGTGTCATTAGACCTGAAGCAACTGAGTTCAAGGCATCAAGCGGGAAGTTTGAAT	scaffold10305	792826	1	2.2033e-27	Chromosome08	27251889	1	2.4105e-27	16:T>C	16	0.989362	0.451613	0.849462	0.150538	0.548387	0.301075	0.495317	0.255752	0.375535	3.31481	4.63542	1	1	0	0	1	0	1	2	1	2	1	1	2	1	2	0	1	1	1	2	1	2	0	2	1	0
20470973|F|0-30:T>C-30:T>C	TGCAGAAAGGATCGGTTCGGTGATCCTAAGTGAGTCAGCAGAGATGAATTCGCAGATTCCGCAATTCTC	TGCAGAAAGGATCGGTTCGGTGATCCTAAGTGAGTCAGCAGAGATGAATTCGCAGATTCCGCAATTCTC	scaffold05310	28681	1	4.73568e-29	Chromosome10	12245483	1	5.18104e-29	30:T>C	30	1	1	0.106383	0.893617	0	0.106383	0	0.190131	0.095066	11.5169	6.38462	1	0	0	0	2	0	0	0	0	2	0	0	0	0	0	0	0	0	0	0	0	0	0	0	2	0
7122570|F|0-33:C>G-33:C>G	TGCAGAAAGGATCTGGTAGCACGACTTGCATCGCTTAGGTCAAGAAAGGTGTTTGTTATTGTTTCATTA	TGCAGAAAGGATCTGGTAGCACGACTTGCATCGCTTAGGTCAAGAAAGGTGTTTGTTATTGTTTCATTA	scaffold07444	253708	1	2.2033e-27	Chromosome10	19085940	1	2.4105e-27	33:C>G	33	1	0.957447	0.638298	0.361702	0.042553	0.595745	0.081485	0.461747	0.271616	20.9027	15.32	1	2	0	1	0	2	2	2	2	2	2	2	0	2	0	0	2	2	0	2	0	0	2	0	2	0
7111212|F|0-36:G>A-36:G>A	TGCAGAAAGGCAGAATGGCCAGTGAATATAAGCATTGGAAAAGAAAGAGATACCTTTTCCTTTCTTTGC	TGCAGAAAGGCAGAATGGCCAGTGAATATAAGCATTGGAAAAGAAAGAGATACCTTTTCCTTTCTTTGC	scaffold00708	125579	1	2.2033e-27	Chromosome03	28892897	1	2.4105e-27	36:G>A	36	1	0.978723	0.457447	0.542553	0.021277	0.43617	0.041648	0.496378	0.269013	8.33043	6.03922	1	0	2	0	0	0	2	0	2	0	2	0	0	0	0	0	2	1	0	2	0	0	0	0	2	0
7111215|F|0-28:C>T-28:C>T	TGCAGAAAGGCCGGTAAATAAAAGTTCTCTGTTGGGTAAATTTGTTGATGGGACAGACATGTTTCGGGA	TGCAGAAAGGCCGGTAAATAAAAGTTCTCTGTTGGGTAAATTTGTTGATGGGACAGACATGTTTCGGGA	scaffold08686	272182	1	2.2033e-27	Chromosome14	12523173	1	2.4105e-27	28:C>T	28	1	0.957447	0.723404	0.276596	0.042553	0.680851	0.081485	0.400181	0.240833	15.9018	12.7241	1	1	2	0	2	0	2	2	2	0	2	2	0	2	2	2	2	2	2	2	1	2	2	2	0	2
7111607|F|0-7:A>G-7:A>G	TGCAGAAAGGCTCGAAAAATTCAGGGAAAGTACTTCCCAACTTCATTTCGTGTATGAAAACAAGATTAG	TGCAGAAAGGCTCGAAAAATTCAGGGAAAGTACTTCCCAACTTCATTTCGTGTATGAAAACAAGATTAG	scaffold11170	276480	1	4.73568e-29	Chromosome06	478851	1	5.18104e-29	7:A>G	7	1	1	0.12766	0.87234	0	0.12766	0	0.222725	0.111363	11.5169	5.73333	1	0	0	2	0	0	0	0	0	0	0	0	0	0	0	2	0	0	0	0	0	2	0	0	0	0
7106792|F|0-19:A>C-19:A>C	TGCAGAAAGGGAAAGATCTAAAGCCAATTTCAAGCATTGCATTTGGGCCATTTCAGTCCCTAACCACAC	TGCAGAAAGGGAAAGATCTAAAGCCAATTTCAAGCATTGCATTTGGGCCATTTCAGTCCCTAACCACAC	scaffold03834	58454	1	4.73568e-29	Chromosome05	8608017	1	5.18104e-29	19:A>C	19	1	0.968085	0.319149	0.680851	0.031915	0.287234	0.061793	0.434586	0.248189	8.14783	5.17143	1	2	0	0	0	0	0	0	0	0	0	0	0	0	2	0	0	2	2	0	0	0	0	2	0	2
7146623|F|0-37:T>C-37:T>C	TGCAGAAAGGTTTAGGGAAGAAGATGGAACAAGAAAGTTCTTGGGAAGGAACAACATACTTTGTACTTT	TGCAGAAAGGTTTAGGGAAGAAGATGGAACAAGAAAGTTCTTGGGAAGGAACAACATACTTTGTACTTT	scaffold05875	1607438	1	4.73568e-29	Chromosome04	27839004	1	5.18104e-29	37:T>C	37	1	1	0.106383	0.893617	0	0.106383	0	0.190131	0.095066	6.83898	3.92308	1	2	0	0	0	2	0	0	0	0	0	0	0	0	0	0	0	0	2	0	0	0	0	0	0	0
7111069|F|0-8:G>A-8:G>A	TGCAGAAAGTAAAGAATTGAAATCTTCAGGAAGTAACCAATTATCATAGAAGGAAATATTACAGATCGG	TGCAGAAAGTAAAGAATTGAAATCTTCAGGAAGTAACCAATTATCATAGAAGGAAATATTAC	scaffold09692	323804	1	5.32832e-23	Chromosome08	5645395	1	5.82929e-23	8:G>A	8	1	0.755319	0.744681	0.255319	0.244681	0.5	0.369624	0.380263	0.374943	22.7912	19.3177	1	1	1	0	2	1	2	0	2	0	2	2	0	2	2	0	2	2	0	2	1	0	0	2	0	1
7146626|F|0-37:C>T-37:C>T	TGCAGAAAGTATACTCGCAAAGATGTATCAGAGATATCACATTTCATACAAATAGAATACAAGTGAATC	TGCAGAAAGTATACTCGCAAAGATGTATCAGAGATATCACATTTCATACAAATAGAATACAAGTGAATC	scaffold12794	924007	1	4.73568e-29	Chromosome06	21439379	1	5.18104e-29	37:C>T	37	1	0.968085	0.159574	0.840426	0.031915	0.12766	0.061793	0.268221	0.165007	10.9912	7	1	0	0	0	0	0	0	0	0	0	0	0	1	0	0	0	0	0	0	0	0	0	0	0	0	0
7119740|F|0-33:G>A-33:G>A	TGCAGAAAGTATTATTTGCAGCAGATTGATTGGGTAGTAATCTCTCTTTTTTTTCTCCATGAGGTTTTC	TGCAGAAAGTATTATTTGCAGCAGATTGATTGGGTAGTAATCTCTCTTTTTTTTCTCCATGAGGTTTTC	scaffold03750	32748	1	4.73568e-29	Chromosome11	24658399	1	5.18104e-29	33:G>A	33	1	0.989362	0.234043	0.765957	0.010638	0.223404	0.02105	0.358533	0.189792	27.8448	18.6429	1	0	0	2	2	0	0	2	0	1	0	0	0	0	0	0	0	0	0	0	0	2	0	0	2	0
7111228|F|0-23:A>T-23:A>T	TGCAGAAAGTGAGCGCAGTAAAAATTGATTCTTGCGTTTACTGCACAGACTTTCAACTATCTTGTCACA	TGCAGAAAGTGAGCGCAGTAAAAATTGATTCTTGCGTTTACTGCACAGACTTTCAACTATCTTGTCACA	scaffold11279	438751	1	4.73568e-29	Chromosome08	3002733	1	5.18104e-29	23:A>T	23	1	1	0.202128	0.797872	0	0.202128	0	0.322544	0.161272	19.1949	12.2917	1	0	2	2	2	0	0	2	0	0	0	0	0	0	2	0	0	0	0	0	0	0	0	0	0	0
7146635|F|0-39:T>G-39:T>G	TGCAGAAAGTTATTTTTGTTGTTTAGACTTGGTTCACCTTTCTTATTCAGTTAGGTGGGAATATCATTT	TGCAGAAAGTTATTTTTGTTGTTTAGACTTGGTTCACCTTTCTTATTCAGTTAGGTGGGAATATCATTT	scaffold09565	43842	1	4.73568e-29	Chromosome18	9576440	1	5.18104e-29	39:T>G	39	1	0.989362	0.031915	0.968085	0.010638	0.021277	0.02105	0.061793	0.041421	9.36752	4.33333	1	0	0	0	0	0	0	0	0	0	0	0	0	0	0	0	0	0	0	0	0	0	0	0	0	2
7146636|F|0-43:G>A-43:G>A	TGCAGAAAGTTCCAGTGCCAACATCAGGTCCTTCCCCGTGTTCGCATATTCCTCCTCCTGGGAAAGCCA	TGCAGAAAGTTCCAGTGCCAACATCAGGTCCTTCCCCGTGTTCGCATATTCCTCCTCCTGGGAAAGCCA	scaffold10563	559103	1	4.73568e-29	Chromosome03	26020726	1	5.18104e-29	43:G>A	43	1	1	0.095745	0.904255	0	0.095745	0	0.173155	0.086578	6.27966	3.58333	1	0	0	2	0	0	0	2	0	0	0	0	0	0	0	0	0	0	0	0	0	0	2	0	0	0
7110680|F|0-38:A>G-38:A>G	TGCAGAAAGTTTAGTACTTCGGTTAGTGAAATAGGTCAAGAGATTCCATTGGCTTCTTGGTTTATGCGT	TGCAGAAAGTTTAGTACTTCGGTTAGTGAAATAGGTCAAGAGATTCCATTGGCTTCTTGGTTTATGCGT	scaffold11670	116350	1	4.73568e-29	Chromosome08	25111375	1	5.18104e-29	38:A>G	38	1	0.978723	0.510638	0.489362	0.021277	0.489362	0.041648	0.499774	0.270711	15.2261	11.0172	1	0	0	0	0	0	2	0	2	2	2	2	0	0	0	1	2	0	0	0	2	2	0	0	2	2
7111240|F|0-30:G>A-30:G>A	TGCAGAAAGTTTTAGACAAGAATATAATAGGATTGCGTGCATAACATGCTGGGGTTTCTTTTTGTTCTT	TGCAGAAAGTTTTAGACAAGAATATAATAGGATTGCGTGCATAACATGCTGGGGTTTCTTTTTGTTCTT	scaffold11635	284332	1	4.73568e-29	Chromosome15	12130958	1	5.18104e-29	30:G>A	30	1	1	0.361702	0.638298	0	0.361702	0	0.461747	0.230874	28.339	15.5957	1	0	2	2	0	2	0	2	0	2	0	0	2	0	2	2	0	0	2	2	0	2	0	2	2	2
7106918|F|0-59:A>C-59:A>C	TGCAGAAATAAAAAAGAAAACAGGTTACATAGAGAAGGGAAAAAAAAGGATATGCTACCAAAGATGGGG	TGCAGAAATAAAAAAGAAAACAGGTTACATAGAGAAGGGAAAAAAAAGGATATGCTACCAAAGATGGGG	scaffold04116	695396	1	2.2033e-27	Chromosome03	5750526	1	2.4105e-27	59:A>C	59	1	0.776596	0.787234	0.212766	0.223404	0.56383	0.34699	0.334993	0.340991	13.5745	11.0549	1	2	2	2	2	1	2	0	2	0	2	2	1	0	0	2	2	2	2	0	2	1	0	0	2	2
20492929|F|0-19:G>T-19:G>T	TGCAGAAATAAAAAGTCAAGTAGGAACTAGCATAACTGACTAGCCCATAACAAAATGATATTTACAGAT	TGCAGAAATAAAAAGTCAAGTAGGAACTAGCATAACTGACTAGCCCATAACAAAATGATATTTAC	scaffold10136	55855	1	2.65588e-26	Chromosome18	16743465	1	2.83471e-26	19:G>T	19	1	1	0.031915	0.968085	0	0.031915	0	0.061793	0.030896	22.6186	8.75	1	0	0	0	0	0	0	0	0	0	0	2	0	0	0	0	0	0	0	0	0	0	0	0	0	0
13858564|F|0-11:A>G-11:A>G	TGCAGAAATAAAAATATTCCCGCCAGCCCATCTTACTATCCCATCCCGCTATGTTATTACTTTCATGAA	TGCAGAAATAAAAATATTCCCGCCAGCCCATCTTACTATCCCATCCCGCTATGTTATTACTTTCATGAA	scaffold10114	197785	1	4.73568e-29	Chromosome16	24829553	1	5.18104e-29	11:A>G	11	1	0.957447	0.595745	0.404255	0.042553	0.553191	0.081485	0.481666	0.281575	16.6018	13.9242	1	2	0	0	0	2	2	0	2	1	2	0	2	0	0	0	2	0	0	0	0	0	2	2	0	2
7106919|F|0-58:G>T-58:G>T	TGCAGAAATAAAACTGTGGCTAGCTTCATAGTCAATCAGAATTGTGAATGTCTAACCCGTCAACCTTCC	TGCAGAAATAAAACTGTGGCTAGCTTCATAGTCAATCAGAATTGTGAATGTCTAACCCGTCAACCTTCC	scaffold11001	137810	1	2.2033e-27	Chromosome17	4273397	1	2.4105e-27	58:G>T	58	1	0.787234	0.585106	0.414894	0.212766	0.37234	0.334993	0.485514	0.410254	12.6044	12.2571	1	0	2	1	1	0	0	1	0	1	0	0	2	2	2	1	0	0	2	2	2	1	2	0	1	2
13858565|F|0-48:C>G-48:C>G	TGCAGAAATAAACTCCATGAGTTGATTGGTCTATATCATCTACAAGCACTATATTTTGAAATTCCAATC	TGCAGAAATAAACTCCATGAGTTGATTGGTCTATATCATCTACAAGCACTATATTTTGAAATTCCAATC	scaffold07595	110514	1	4.73568e-29	Chromosome18	10016948	1	5.18104e-29	48:C>G	48	1	0.989362	0.148936	0.851064	0.010638	0.138298	0.02105	0.253508	0.137279	24.4188	14.0625	1	0	0	0	0	2	0	0	0	2	0	0	0	0	0	0	0	0	0	0	0	0	0	0	0	2
7106920|F|0-64:C>A-64:C>A	TGCAGAAATAAAGAGAGAATATAGAGAGTTGCAACCAGCAAATTCCTTGTCTCTAAGTCCCCCCCCAAA	TGCAGAAATAAAGAGAGAATATAGAGAGTTGCAACCAGCAAATTCCTTGTCTCTAAGTCCCCCCCCAAA	scaffold08265	4172670	1	4.73568e-29	Chromosome05	3900777	1	5.18104e-29	64:C>A	64	1	0.946809	0.478723	0.521277	0.053191	0.425532	0.100724	0.499095	0.299909	8.45045	6.14035	1	1	0	0	2	0	2	0	2	0	2	0	2	1	0	2	2	2	0	0	2	0	0	0	2	0
20484602|F|0-29:A>T-29:A>T	TGCAGAAATAATAATGCCCAAAATAATATAACTACACATTATGAACCATATTTATATCAATGTTAGCTG	TGCAGAAATAATAATGCCCAAAATAATATAACTACACATTATGAACCATATTTATATCAATGTTAGCTG	scaffold04884	4052	1	4.73568e-29	Chromosome16	3096824	1	5.18104e-29	29:A>T	29	1	0.914894	0.489362	0.510638	0.085106	0.404255	0.155727	0.499774	0.32775	8.19626	6.40678	1	2	2	2	2	1	0	2	0	2	0	0	2	0	2	1	0	2	0	0	0	2	0	0	2	2
20470995|F|0-67:T>G-67:T>G	TGCAGAAATAATGCTGGGATATTTTCTCAGAATTTGGAATTTTCTGAAGACAAAATTGAGATGACATTC	TGCAGAAATAATGCTGGGATATTTTCTCAGAATTTGGAATTTTCTGAAGACAAAATTGAGATGACATTC	scaffold03410	169627	1	4.73568e-29	Chromosome14	5128761	1	5.18104e-29	67:T>G	67	0.989362	1	0.064516	0.935484	0	0.064516	0	0.120708	0.060354	4.55172	2.66667	1	0	0	0	0	0	0	0	0	0	0	0	0	0	0	0	0	0	0	0	0	0	0	0	0	0
7116972|F|0-16:G>A-16:G>A	TGCAGAAATACACCTGGACATTGTAAAGTATGTAGACACGGGTCTTGAAGTGAAAGCAAAAATTAGTTA	TGCAGAAATACACCTGGACATTGTAAAGTATGTAGACACGGGTCTTGAAGTGAAAGCAAAAATTAGTTA	scaffold07520	1958731	1	4.73568e-29	Chromosome01	25592508	1	5.18104e-29	16:G>A	16	1	1	0.234043	0.765957	0	0.234043	0	0.358533	0.179267	41.1525	25.2581	1	0	2	2	0	0	0	2	0	0	0	0	2	0	2	2	0	0	2	0	0	2	2	0	0	0
7146644|F|0-53:T>A-53:T>A	TGCAGAAATACCATTATTCTTCTACTGTTGCATTCTCAAATTTGGAGGAAACCTAAAACAGCAAACAAA	TGCAGAAATACCATTATTCTTCTACTGTTGCATTCTCAAATTTGGAGGAAACCTAAAACAGCAAACAAA	scaffold08059	101116	1	4.73568e-29	Chromosome06	14334927	1	5.18104e-29	53:T>A	53	0.840426	0.936709	0.278481	0.721519	0.063291	0.21519	0.118571	0.401859	0.260215	6.7766	4.71429	1	0	0	2	0	-	0	2	0	1	0	0	0	-	2	2	0	0	-	0	0	0	0	0	2	0
7106925|F|0-52:A>C-52:A>C	TGCAGAAATAGCACTTGAAGTTGAGCAGTTGTAATTTGAAAGTATCTTGGGTAAGATAGGAATCTCCAC	TGCAGAAATAGCACTTGAAGTTGAGCAGTTGTAATTTGAAAGTATCTTGGGTAAGATAGGAATCTCCAC	scaffold03874	198760	1	4.73568e-29	Chromosome16	28549256	1	5.18104e-29	52:A>C	52	1	0.989362	0.202128	0.797872	0.010638	0.191489	0.02105	0.322544	0.171797	7.69231	4.29167	1	0	0	0	2	0	0	2	0	0	0	0	0	0	0	2	0	0	0	0	0	2	0	0	2	0
20110222|F|0-65:C>T-65:C>T	TGCAGAAATAGCCATGTGGAGCTGGATTTTTACGGTCAGTTTCAGCATTTGAGATCATCTCAATGCGGC	TGCAGAAATAGCCATGTGGAGCTGGATTTTTACGGTCAGTTTCAGCATTTGAGATCATCTCAATGCGGC	scaffold05045	17450	2	4.73568e-29	Chromosome15	16849507	2	5.18104e-29	65:C>T	65	1	1	0.329787	0.670213	0	0.329787	0	0.442055	0.221028	10.5932	6.5	1	0	0	0	0	0	2	0	2	0	2	0	0	0	0	0	2	0	0	2	2	0	0	2	0	2
7119745|F|0-27:C>A-27:C>A	TGCAGAAATATCTTTGCTAGACCAATCCATCAAATCCTCACTCCTTTGGTTTGCCGCTACTAAGTTGTT	TGCAGAAATATCTTTGCTAGACCAATCCATCAAATCCTCACTCCTTTGGTTTGCCGCTACTAAGTTGTT	scaffold07520	2165765	1	4.73568e-29	Chromosome01	25788776	1	5.18104e-29	27:C>A	27	1	0.819149	0.382979	0.617021	0.180851	0.202128	0.296288	0.472612	0.38445	7.75789	6.35556	1	2	0	1	2	0	0	1	0	1	0	0	0	0	0	1	0	0	0	2	0	1	0	0	1	2
7146649|F|0-50:A>G-50:A>G	TGCAGAAATATGATAACTAAAAGAAGGTTGGAGTCTGAATTCAACTAAGGATGTTGATGCATTTAGGGT	TGCAGAAATATGATAACTAAAAGAAGGTTGGAGTCTGAATTCAACTAAGGATGTTGATGCATTTAGGGT	scaffold02994	50744	1	4.73568e-29	Chromosome04	21943863	1	5.18104e-29	50:A>G	50	1	0.989362	0.202128	0.797872	0.010638	0.191489	0.02105	0.322544	0.171797	12.0855	5.5	1	0	2	0	0	0	0	2	0	2	0	0	0	0	2	0	0	0	0	0	0	2	0	0	2	0
7111263|F|0-19:T>A-19:T>A	TGCAGAAATCAAATGAAGATGCGGGGTAGATGCAGATTTCCTTATAGGGTTCATGTTTCCAGGGAAGGA	TGCAGAAATCAAATGAAGATGCGGGGTAGATGCAGATTTCCTTATAGGGTTCATGTTTCCAGGGAAGGA	scaffold09260	89327	1	4.73568e-29	Chromosome05	14849321	1	5.18104e-29	19:T>A	19	1	0.914894	0.648936	0.351064	0.085106	0.56383	0.155727	0.455636	0.305681	10.5189	8.36	1	2	0	0	1	2	2	0	2	1	2	2	2	0	2	1	2	0	0	0	2	0	0	0	1	2
20498393|F|0-30:G>A-30:G>A	TGCAGAAATCAACAAGATGAACACTGCCATGATAATATGCTTATAGTTGAGCATTCCTGCATCTATTCT	TGCAGAAATCAACAAGATGAACACTGCCATGATAATATGCTTATAGTTGAGCATTCCTGCATCTATTCT	scaffold06871	904442	1	2.2033e-27	Chromosome01	22751169	1	2.4105e-27	30:G>A	30	1	1	0.06383	0.93617	0	0.06383	0	0.119511	0.059756	9.02542	5.28571	1	2	0	0	0	0	0	0	0	0	0	0	0	0	0	0	0	0	0	0	0	0	0	0	0	0
7111264|F|0-18:C>T-18:C>T	TGCAGAAATCAACCAAATCGCTAAATATACCTGTAAAGGACCAAAATAAGGATGAAGAATGTCCCTGGA	TGCAGAAATCAACCAAATCGCTAAATATACCTGTAAAGGACCAAAATAAGGATGAAGAATGTCCCTGGA	scaffold03614	1461312	1	4.73568e-29	Chromosome09	25512081	1	5.18104e-29	18:C>T	18	1	0.989362	0.510638	0.489362	0.010638	0.5	0.02105	0.499774	0.260412	6.33333	3.98276	1	0	0	0	2	2	2	0	2	0	2	0	0	0	0	0	2	2	0	2	2	0	2	0	0	0
7143033|F|0-59:C>G-59:C>G	TGCAGAAATCAGGAGAAAACGGCAGTAGTGTTTGGAGCTTCCCATTTTTCAGGTTTTCTCTCTGTGTCT	TGCAGAAATCAGGAGAAAACGGCAGTAGTGTTTGGAGCTTCCCATTTTTCAGGTTTTCTCTCTGTGTCT	scaffold09365	379275	1	4.73568e-29	Chromosome03	27764531	1	5.18104e-29	59:C>G	59	0.925532	0.873563	0.206897	0.793103	0.126437	0.08046	0.220901	0.328181	0.274541	6.46316	5.21739	1	2	-	1	0	0	0	1	0	0	0	0	1	0	0	0	0	0	0	0	0	0	1	0	0	0
7142298|F|0-30:A>C-30:A>C	TGCAGAAATCAGTATTGCATTAGTGATTGAAGTTAGACTAGATTTGATGGACCTCAATAATATGATACC	TGCAGAAATCAGTATTGCATTAGTGATTGAAGTTAGACTAGATTTGATGGACCTCAATAATATGATACC	scaffold12794	949610	1	4.73568e-29	Chromosome06	21413877	1	5.18104e-29	30:A>C	30	1	0.946809	0.37234	0.62766	0.053191	0.319149	0.100724	0.467406	0.284065	39.1712	26.5349	1	0	0	0	0	0	0	2	0	0	0	0	0	2	1	1	0	0	2	0	0	2	0	2	2	0
7146655|F|0-37:A>G-37:A>G	TGCAGAAATCAGTTGCCAATGAAAGGGATTAGAGCAGAGAATATGACTTTGATTTGAGATAGGCAAGTA	TGCAGAAATCAGTTGCCAATGAAAGGGATTAGAGCAGAGAATATGACTTTGATTTGAGATAGGCAAGTA	scaffold04457	157386	1	4.73568e-29	Chromosome01	30978884	1	5.18104e-29	37:A>G	37	1	1	0.042553	0.957447	0	0.042553	0	0.081485	0.040742	14.8559	4	1	0	0	0	0	0	0	0	0	0	0	0	0	0	0	0	0	0	0	0	0	0	0	2	0	0
7125382|F|0-11:C>A-11:C>A	TGCAGAAATCCCTGAACTTCTTGGGATGAATCGTCGTTACATGATTGAATGTGAAAACTAGTGGCCCCA	TGCAGAAATCCCTGAACTTCTTGGGATGAATCGTCGTTACATGATTGAATGTGAAAACTAGTGGCCCCA	scaffold11714	183897	1	4.73568e-29	Chromosome04	15394019	1	5.18104e-29	11:C>A	11	0.989362	1	0.032258	0.967742	0	0.032258	0	0.062435	0.031217	14.5299	7	1	0	0	0	0	0	0	0	0	0	0	0	0	0	0	0	0	0	0	0	0	0	0	0	0	2
20471019|F|0-24:A>C-24:A>C	TGCAGAAATCCGAATACCCAAGTAAAACTAGCTTCTTCCTAGAACTCCAGATCCCCATCACTAGCAATT	TGCAGAAATCCGAATACCCAAGTAAAACTAGCTTCTTCCTAGAACTCCAGATCCCCATCACTAGCAATT	scaffold06488	23302	1	4.73568e-29	Chromosome08	24517923	1	5.18104e-29	24:A>C	24	1	0.978723	0.12766	0.87234	0.021277	0.106383	0.041648	0.222725	0.132187	12.4696	8.1875	1	0	0	0	0	0	0	0	0	2	0	0	0	0	0	1	0	0	0	0	0	2	0	0	2	2
7111277|F|0-51:G>C-51:G>C	TGCAGAAATCTGATCCAATGTAATATCATCACTTTCAGCTGCTGATGGCACGATCAAGTCGAGCCTCCG	TGCAGAAATCTGATCCAATGTAATATCATCACTTTCAGCTGCTGATGGCACGATCAAGTCGAGCCTCCG	scaffold10173	69038	1	4.73568e-29	Chromosome01	17051844	1	5.18104e-29	51:G>C	51	0.989362	0.698925	0.709677	0.290323	0.301075	0.408602	0.420858	0.412071	0.416464	10.8049	11.075	1	0	0	0	0	2	1	0	1	0	1	1	2	2	0	0	1	1	2	2	1	0	2	2	0	0
7146657|F|0-58:C>A-58:C>A	TGCAGAAATCTGCTGGTGGATATGGTGCTATTCGTATCAACAATCCTTTCGATGTTCCCATTCCATTTC	TGCAGAAATCTGCTGGTGGATATGGTGCTATTCGTATCAACAATCCTTTCGATGTTCCCATTCCATTTC	scaffold02943	249732	1	4.73568e-29	Chromosome18	1060311	1	5.18104e-29	58:C>A	58	1	1	0.180851	0.819149	0	0.180851	0	0.296288	0.148144	11.5	6.2	1	2	0	0	0	0	0	0	0	0	0	2	0	0	0	0	0	0	0	0	0	2	0	0	0	0
7106929|F|0-65:C>A-65:C>A	TGCAGAAATGAAAACTCTTGCTTCATATCATTCCCATTTGGAAATCAGAATCTTAGGAATAAACCCCTG	TGCAGAAATGAAAACTCTTGCTTCATATCATTCCCATTTGGAAATCAGAATCTTAGGAATAAACCCCTG	scaffold12794	2218083	1	4.73568e-29	Chromosome06	20142866	1	5.18104e-29	65:C>A	65	1	0.904255	0.276596	0.723404	0.095745	0.180851	0.173155	0.400181	0.286668	8.73585	6.24242	1	0	0	0	1	1	0	0	0	1	0	0	0	0	0	0	0	2	2	0	2	0	2	0	0	0
7108989|F|0-46:A>C-46:A>C	TGCAGAAATGAAATAGTCTCTTCCTCGACAAAATAACAAATCGGTTATCCTGTTCCGAAAGGCAGAGGA	TGCAGAAATGAAATAGTCTCTTCCTCGACAAAATAACAAATCGGTTATCCTGTTCCGAAAGGCAGAGGA	scaffold01349	267689	1	4.73568e-29	Chromosome13	23240377	1	5.18104e-29	46:A>C	46	0.989362	0.946237	0.333333	0.666667	0.053763	0.27957	0.101746	0.444444	0.273095	13.8571	10.9487	1	0	0	0	2	2	0	0	0	0	0	2	0	0	0	0	0	2	2	2	2	0	2	0	0	0
7109716|F|0-18:G>A-18:G>A	TGCAGAAATGAAATTTGCGCACAAATTTTTCAGCTAAATATCATTCCAGGGTAAGAACCAGTGAGGACC	TGCAGAAATGAAATTTGCGCACAAATTTTTCAGCTAAATATCATTCCAGGGTAAGAACCAGTGAGGACC	scaffold03693	123880	1	2.2033e-27	Chromosome16	22630981	1	2.4105e-27	18:G>A	18	1	1	0.223404	0.776596	0	0.223404	0	0.34699	0.173495	19.5593	10.7778	1	0	0	0	0	2	0	0	0	2	0	2	0	0	0	0	0	2	2	2	0	0	0	0	0	0
20484621|F|0-29:G>C-29:G>C	TGCAGAAATGAATAGATGTTCATGATTATGATAAGAAGATAGAAAATTGCAGAATCCAAAAGCAAAGTA	TGCAGAAATGAATAGATGTTCATGATTATGATAAGAAGATAGAAAATTGCAGAATCCAAAAGCAAAGTA	scaffold08847	254084	1	4.73568e-29	Chromosome17	22472040	1	5.18104e-29	29:G>C	29	1	1	0.085106	0.914894	0	0.085106	0	0.155727	0.077863	23.8983	13.7273	1	0	0	0	0	0	0	0	0	2	0	0	0	0	0	0	0	0	0	2	0	0	2	0	0	0
7111281|F|0-56:C>G-56:C>G	TGCAGAAATGAATCTCCAGGATAAAGATGATTTGGGCCATAAAAAATATTCAAATTCCAATATCTGATA	TGCAGAAATGAATCTCCAGGATAAAGATGATTTGGGCCATAAAAAATATTCAAATTCCAATATCTGATA	scaffold03614	514800	1	4.73568e-29	Chromosome09	24564158	1	5.18104e-29	56:C>G	56	0.989362	1	0.032258	0.967742	0	0.032258	0	0.062435	0.031217	24.1111	14.75	1	0	0	0	0	0	0	0	0	0	0	2	0	0	0	0	0	0	0	0	0	0	0	0	0	0
7106930|F|0-61:T>C-61:T>C	TGCAGAAATGAATTCAATCACTTGATTTTGCATCCATATACCATACCACTGGTTGAAAGAATAAATCCT	TGCAGAAATGAATTCAATCACTTGATTTTGCATCCATATACCATACCACTGGTTGAAAGAATAAATCCT	scaffold07520	119769	1	2.2033e-27	Chromosome01	23762926	1	2.4105e-27	61:T>C	61	1	0.904255	0.180851	0.819149	0.095745	0.085106	0.173155	0.296288	0.234722	7.54808	6.77273	1	0	0	0	1	0	0	0	0	1	0	0	0	0	0	1	0	0	0	0	0	1	0	0	1	0
7111282|F|0-65:A>G-65:A>G	TGCAGAAATGAGGGGGGAAATCCACAAAGCAGAAAAAGCATTGTCGAGATAGAAAGGGGCATATAACAT	TGCAGAAATGAGGGGGGAAATCCACAAAGCAGAAAAAGCATTGTCGAGATAGAAAGGGGCATATAACAT	scaffold11378	217483	1	2.2033e-27	Chromosome13	4715330	1	2.4105e-27	65:A>G	65	1	0.93617	0.414894	0.585106	0.06383	0.351064	0.119511	0.485514	0.302512	7.62727	6.44898	1	0	1	0	2	0	0	2	0	2	0	0	2	0	2	2	0	0	0	0	0	2	2	0	1	2
7122509|F|0-36:C>T-36:C>T	TGCAGAAATGATATGACCCAAGTATTCAATTTGCTGCTGTCCAAAAAAACACTCGGAAAACTTAGCAAA	TGCAGAAATGATATGACCCAAGTATTCAATTTGCTGCTGTCCAAAAAAACACTCGGAAAACTTAGCAAA	scaffold07070	106595	2	4.73568e-29	Chromosome07	15357271	2	5.18104e-29	36:C>T	36	1	0.925532	0.404255	0.595745	0.074468	0.329787	0.137845	0.481666	0.309756	33.7431	24.6327	1	1	2	0	0	2	0	2	0	0	0	2	0	0	1	2	0	2	2	0	2	2	0	0	0	0
7111284|F|0-38:C>A-38:C>A	TGCAGAAATGCTCTTCAAACTTTTTAGTACTATACTAACAATATCAAGAAGAGGAGCTCATGTATCCCT	TGCAGAAATGCTCTTCAAACTTTTTAGTACTATACTAACAATATCAAGAAGAGGAGCTCATGTATCCCT	scaffold01127	27774	1	4.73568e-29	Chromosome06	23706313	1	5.18104e-29	38:C>A	38	1	1	0.180851	0.819149	0	0.180851	0	0.296288	0.148144	16.3305	7.13636	1	0	2	0	0	2	0	0	0	2	0	0	0	0	0	0	0	0	2	0	2	0	0	0	0	0
7109719|F|0-11:T>A-11:T>A	TGCAGAAATGCTGACCTTATGAAAAGACAAACTGAGCAATACCAAGTGCGACATAAACAGAAAATGCAG	TGCAGAAATGCTGACCTTATGAAAAGACAAACTGAGCAATACCAAGTGCGACATAAACAGAAAATGCAG		0	0	999	Chromosome02	3759631	1	5.18104e-29	11:T>A	11	1	1	0.180851	0.819149	0	0.180851	0	0.296288	0.148144	10.5509	5.2381	1	2	0	0	0	0	0	0	0	0	0	2	0	2	0	0	0	0	0	0	2	0	0	0	0	2
7123646|F|0-35:G>A-35:G>A	TGCAGAAATGCTGGAAGAGAAGACAAACTGGATCAGATATCCAGATGGGTGGGAGTTGATTACAGATCG	TGCAGAAATGCTGGAAGAGAAGACAAACTGGATCAGATATCCAGATGGGTGGGAGTTGATTAC	scaffold05269	29188	1	3.26801e-25	Chromosome16	22238560	1	3.48359e-25	35:G>A	35	1	0.946809	0.382979	0.617021	0.053191	0.329787	0.100724	0.472612	0.286668	21.3874	15.9111	1	0	0	0	2	2	0	0	0	0	0	0	1	2	2	0	0	0	0	0	2	0	2	1	2	2
7139045|F|0-28:A>C-28:A>C	TGCAGAAATGGGATCCGATATTATTGAGATATTACAATATTTGGCATCAATTGGAATTGAGAGGTTGTC	TGCAGAAATGGGATCCGATATTATTGAGATATTACAATATTTGGCATCAATTGGAATTGAGAGGTTGTC	scaffold00206	483470	1	4.73568e-29	Chromosome03	4498374	1	5.18104e-29	28:A>C	28	1	1	0.042553	0.957447	0	0.042553	0	0.081485	0.040742	33.822	17	1	0	0	0	0	0	0	0	0	2	0	0	0	0	0	0	0	0	0	0	0	0	0	0	0	0
13855334|F|0-44:C>T-44:C>T	TGCAGAAATGGTGAAAGGAAATCAAAACTTGTACAGGTTGAGAACTGGAGGACAATGGAACAATGAGAT	TGCAGAAATGGTGAAAGGAAATCAAAACTTGTACAGGTTGAGAACTGGAGGACAATGGAACAATGAGAT	scaffold02620	138350	1	4.73568e-29	Chromosome08	25017858	1	5.18104e-29	44:C>T	44	1	0.744681	0.574468	0.425532	0.255319	0.319149	0.380263	0.488909	0.434586	16.2235	14.9565	1	0	1	1	1	1	0	2	0	1	0	0	2	0	2	1	0	2	2	2	0	1	1	0	1	1
7106935|F|0-42:G>A-42:G>A	TGCAGAAATGTATGGTGGAAATAGATGGTGAGAGATGACCATGCAAAAAGTGATCCAGACCTCCCACAG	TGCAGAAATGTATGGTGGAAATAGATGGTGAGAGATGACCATGCAAAAAGTGATCCAGACCTCCCACAG	scaffold04667	90226	1	2.2033e-27	Chromosome16	3214583	1	2.4105e-27	42:G>A	42	1	0.56383	0.914894	0.085106	0.43617	0.478723	0.491852	0.155727	0.323789	6.41538	9.02752	1	1	2	2	2	0	1	2	1	1	1	1	2	1	2	2	1	2	2	1	1	2	1	1	2	2
7146674|F|0-34:C>A-34:C>A	TGCAGAAATGTCTGCACATACTTCGCGGCCGCCTCGTAATCCTCGGCTTCTAGAGCATTTTTCGCTCCC	TGCAGAAATGTCTGCACATACTTCGCGGCCGCCTCGTAATCCTCGGCTTCTAGAGCATTTTTCGCTCCC	scaffold03581	151255	1	4.73568e-29	Chromosome05	1177538	1	5.18104e-29	34:C>A	34	1	1	0.053191	0.946809	0	0.053191	0	0.100724	0.050362	7.88983	2.8	1	0	0	0	0	0	0	0	0	0	0	0	0	0	0	0	0	0	0	0	0	0	0	0	0	0
7109723|F|0-26:A>G-26:A>G	TGCAGAAATGTCTGCACATACTTTGAAGCCGCCTCATAATCCTCTGCTTCGAGAGCGTTTTTCACTCCC	TGCAGAAATGTCTGCACATACTTTGAAGCCGCCTCATAATCCTCTGCTTCGAGAGCGTTTTTCACTCCC	scaffold07571	76193	1	4.73568e-29	Chromosome01	31964800	1	5.18104e-29	26:A>G	26	1	1	0.297872	0.702128	0	0.297872	0	0.418289	0.209144	8.35593	5.13158	1	0	2	0	2	2	0	2	0	0	0	0	2	0	2	0	0	0	2	0	0	2	2	0	2	0
13855336|F|0-16:G>T-16:G>T	TGCAGAAATTACGGTTGCTATTTGTTCTTGATCTGTTTTCTGGATAGTTGTTTTTCATTTTTACAGATC	TGCAGAAATTACGGTTGCTATTTGTTCTTGATCTGTTTTCTGGATAGTTGTTTTTCATTTTTAC	scaffold06754	287247	1	9.31928e-26	Chromosome11	22714750	1	9.94056e-26	16:G>T	16	0.989362	1	0.473118	0.526882	0	0.473118	0	0.498555	0.249277	17	11.5893	1	2	0	0	0	2	2	0	2	-	2	2	0	2	0	0	2	2	0	0	2	2	0	2	0	0
7106937|F|0-22:T>G-22:T>G	TGCAGAAATTATAGTTGTTTGCTACTGTATGAGTTTGCTTCCAAAAAATAAAGTTGCTTCAATGCTTTG	TGCAGAAATTATAGTTGTTTGCTACTGTATGAGTTTGCTTCCAAAAAATAAAGTTGCTTCAATGCTTTG	scaffold05875	200950	1	4.73568e-29	Chromosome04	26423051	1	5.18104e-29	22:T>G	22	1	0.925532	0.553191	0.446809	0.074468	0.478723	0.137845	0.494341	0.316093	16.3909	10.619	1	0	0	0	0	0	2	2	2	2	2	0	0	2	0	0	2	1	0	2	0	0	2	0	2	0
20471043|F|0-32:C>T-32:C>T	TGCAGAAATTATATCAGGCCACAGAAATTTTACTCAGCTCCTAAATGAACGTGTCTCATGAGCATACCC	TGCAGAAATTATATCAGGCCACAGAAATTTTACTCAGCTCCTAAATGAACGTGTCTCATGAGCATACCC	scaffold03219	190410	1	2.2033e-27	Chromosome13	715276	1	2.4105e-27	32:C>T	32	1	1	0.095745	0.904255	0	0.095745	0	0.173155	0.086578	18.1356	7	1	0	0	0	0	0	0	0	0	0	0	0	0	0	0	0	0	0	0	0	0	0	0	0	0	0
7111294|F|0-13:T>G-13:T>G	TGCAGAAATTATCTTATGCAGGGTATGTATGAATAGCTAGGAGACTGGATAGGGCACTTATGTATTTTA	TGCAGAAATTATCTTATGCAGGGTATGTATGAATAGCTAGGAGACTGGATAGGGCACTTATGTATTTTA	scaffold07069	295413	1	4.73568e-29	Chromosome15	14452011	1	5.18104e-29	13:T>G	13	1	0.968085	0.489362	0.510638	0.031915	0.457447	0.061793	0.499774	0.280783	31.6283	22.4915	1	2	0	2	0	0	2	0	2	0	2	2	2	1	0	0	2	1	0	0	0	0	2	2	2	0
7119753|F|0-15:G>A-15:G>A	TGCAGAAATTATGGGGAAAAGCACCTATGGAACTGTCTATAAGGCCACATTAGAGGATGGAAATCAAGT	TGCAGAAATTATGGGGAAAAGCACCTATGGAACTGTCTATAAGGCCACATTAGAGGATGGAAATCAAGT	scaffold10689	237960	1	4.73568e-29	Chromosome10	589108	1	5.18104e-29	15:G>A	15	1	0.989362	0.265957	0.734043	0.010638	0.255319	0.02105	0.390448	0.205749	34.0513	18.2059	1	2	0	2	0	0	0	2	0	0	0	0	2	0	2	2	0	0	2	0	0	2	0	0	2	0
20484638|F|0-55:T>C-55:T>C	TGCAGAAATTCAACATCAATTTACTTGATTAGCAAAACAAATGTTTCATTTCTAATGGCCAGTGTAATC	TGCAGAAATTCAACATCAATTTACTTGATTAGCAAAACAAATGTTTCATTTCTAATGGCCAGTGTAATC	scaffold06916	1072140	1	4.73568e-29	Chromosome02	10295925	1	5.18104e-29	55:T>C	55	1	1	0.053191	0.946809	0	0.053191	0	0.100724	0.050362	29.983	9	1	0	0	0	0	0	0	0	0	0	0	2	0	0	0	0	0	2	0	0	0	0	0	0	0	0
7111296|F|0-24:C>T-24:C>T	TGCAGAAATTCTCTTACGTGGCAACGTAAAAACTTCACAGCTCTACATAAAATTTAGTTATGGCTACTT	TGCAGAAATTCTCTTACGTGGCAACGTAAAAACTTCACAGCTCTACATAAAATTTAGTTATGGCTACTT	scaffold08000	20057	1	4.73568e-29	Chromosome09	22924435	1	5.18104e-29	24:C>T	24	1	0.893617	0.755319	0.244681	0.106383	0.648936	0.190131	0.369624	0.279878	7.67961	7.04444	1	1	0	0	1	2	2	2	2	0	2	1	0	2	2	1	2	2	2	1	2	2	2	2	0	2
7111299|F|0-32:T>C-32:T>C	TGCAGAAATTGAAGCACGGACATGAGAAATTTTACCAACAGTTTGGCAATATTGTACACAGATGAGTTA	TGCAGAAATTGAAGCACGGACATGAGAAATTTTACCAACAGTTTGGCAATATTGTACACAGATGAGTTA	scaffold08542	350719	1	4.73568e-29	Chromosome08	3600297	1	5.18104e-29	32:T>C	32	1	0.968085	0.425532	0.574468	0.031915	0.393617	0.061793	0.488909	0.275351	10.5664	6.96	1	2	0	0	0	0	2	0	2	0	2	0	2	1	2	0	2	2	0	0	1	0	0	0	0	0
7111303|F|0-20:C>T-20:C>T	TGCAGAAATTGAATTTCCAGCTCAATCTCTCTTGCGACAGCCATAGTGTGTTGAAAATCAACTACTTCA	TGCAGAAATTGAATTTCCAGCTCAATCTCTCTTGCGACAGCCATAGTGTGTTGAAAATCAACTACTTCA	scaffold11297	478502	2	2.2033e-27	Chromosome08	32323238	2	2.4105e-27	20:C>T	20	0.819149	1	0.142857	0.857143	0	0.142857	0	0.244898	0.122449	6.87629	5.42857	1	2	2	0	0	0	0	-	0	0	-	0	0	0	0	0	-	0	0	0	-	0	0	0	2	0
7111304|F|0-15:C>G-15:C>G	TGCAGAAATTGACAACAAACATGAACTTGAATTATTCATCCAAAACAAAAGTGGCAGCTTACAGATCGG	TGCAGAAATTGACAACAAACATGAACTTGAATTATTCATCCAAAACAAAAGTGGCAGCTTAC	scaffold05140	83608	2	5.32832e-23	Chromosome13	15838385	2	5.82929e-23	15:C>G	15	1	0.702128	0.808511	0.191489	0.297872	0.510638	0.418289	0.309642	0.363966	7.40741	7.61458	1	2	0	1	2	1	2	1	2	1	2	2	0	2	2	1	2	1	1	0	2	1	0	2	1	0
7146689|F|0-25:A>G-25:A>G	TGCAGAAATTGAGAAATTGGTGGATAAAGTACTGTCCGAGAATCCAAAGCAGTTGGAACAATACCGTGC	TGCAGAAATTGAGAAATTGGTGGATAAAGTACTGTCCGAGAATCCAAAGCAGTTGGAACAATACCGTGC	scaffold10563	1308465	1	1.0251e-25	Chromosome03	25254606	1	1.1215e-25	25:A>G	25	1	0.925532	0.712766	0.287234	0.074468	0.638298	0.137845	0.409461	0.273653	7.90826	6.7439	1	0	0	0	2	0	2	2	2	1	2	0	2	0	2	2	2	2	0	1	0	2	2	0	2	2
7139050|F|0-57:T>C-57:T>C	TGCAGAAATTGGACAAGAATATGATAACGAAAATTGATACTAAACAATAAAAAAAGATGAGGGAAGCGT	TGCAGAAATTGGACAAGAATATGATAACGAAAATTGATACTAAACAATAAAAAAAGATGAGGGAAGCGT	scaffold03049	690852	1	4.73568e-29	Chromosome03	445786	1	5.18104e-29	57:T>C	57	1	0.968085	0.553191	0.446809	0.031915	0.521277	0.061793	0.494341	0.278067	7.86842	5.54545	1	0	2	2	0	0	2	2	2	0	2	2	2	2	2	0	2	2	0	0	0	0	2	1	0	0
7106943|F|0-9:T>G-9:T>G	TGCAGAAATTGGAGGAAATACGGGGAAAAAAGAGAAAAGACTACAGGAGAGCTCACGAAGAGGACATAT	TGCAGAAATTGGAGGAAATACGGGGAAAAAAGAGAAAAGACTACAGGAGAGCTCACGAAGAGGACATAT	scaffold03614	700454	1	4.73568e-29	Chromosome09	24755903	1	5.18104e-29	9:T>G	9	1	0.978723	0.223404	0.776596	0.021277	0.202128	0.041648	0.34699	0.194319	17.9828	9.52	1	0	2	0	2	0	0	0	0	0	0	0	0	0	2	0	0	0	0	0	0	2	0	0	0	2
13855342|F|0-43:A>G-43:A>G	TGCAGAAATTGGTGTAATAAAGAACCTAAAAGCAAACATGAAAATGAAAAGTGAACCTTTTCCATTGTT	TGCAGAAATTGGTGTAATAAAGAACCTAAAAGCAAACATGAAAATGAAAAGTGAACCTTTTCCATTGTT		0	0	999	Chromosome02	3441758	1	5.18104e-29	43:A>G	43	1	0.968085	0.510638	0.489362	0.031915	0.478723	0.061793	0.499774	0.280783	10.2018	7.45	1	0	0	2	0	2	2	2	2	0	2	2	0	2	1	0	2	0	0	2	0	2	0	0	0	0
7146695|F|0-53:T>C-53:T>C	TGCAGAAATTGTAAAAGCAGATGACCAGAATGCATTTTATACTTGAAGAAATATTGGTAGAGAGAAACC	TGCAGAAATTGTAAAAGCAGATGACCAGAATGCATTTTATACTTGAAGAAATATTGGTAGAGAGAAACC	scaffold06914	220812	1	4.73568e-29	Chromosome07	1110625	1	5.18104e-29	53:T>C	53	0.978723	0.98913	0.065217	0.934783	0.01087	0.054348	0.021503	0.121928	0.071716	7.24561	5.66667	1	0	0	0	0	0	0	0	0	0	0	0	0	0	0	0	0	0	0	0	0	0	1	0	0	0
100001325|F|0-52:G>A-52:G>A	TGCAGAAATTGTGATGATTCTACCCCGAGGAGCATCTGTGCTTTTCAATGGAGGGACAGAAACAGAAAA	TGCAGAAATTGTGATGATTCTACCCCGAGGAGCATCTGTGCTTTTCAATGGAGGGACAGAAACAGAAAA	scaffold01551	61993	1	4.73568e-29	Chromosome15	3684327	1	5.18104e-29	52:G>A	52	0.957447	0.988889	0.044444	0.955556	0.011111	0.033333	0.021975	0.084938	0.053457	3.2243	2.75	1	0	0	0	0	0	0	0	0	0	0	0	0	0	0	0	0	0	0	0	0	0	0	0	0	0
7111308|F|0-38:A>G-38:A>G	TGCAGAAATTGTTCCTTGCTGCTTTTTTTTCTTCTTATACCCAGGTTTTCCATTGGGTGTGGGAGGGCC	TGCAGAAATTGTTCCTTGCTGCTTTTTTTTCTTCTTATACCCAGGTTTTCCATTGGGTGTGGGAGGGCC	scaffold12794	813798	1	4.73568e-29	Chromosome06	21565469	1	5.18104e-29	38:A>G	38	1	0.723404	0.606383	0.393617	0.276596	0.329787	0.400181	0.477365	0.438773	8.21176	8.43056	1	1	2	2	2	0	1	0	1	2	1	1	0	2	0	0	1	1	0	2	2	0	0	2	0	0
7106945|F|0-6:A>T-6:A>T	TGCAGAAATTTAGGGAACTGAAAAGGATGATAAAATTTGCATTTTTCAATCTTCCATCAATTACAGATC	TGCAGAAATTTAGGGAACTGAAAAGGATGATAAAATTTGCATTTTTCAATCTTCCATCAATTAC	scaffold01610	7520	1	9.31928e-26	Chromosome03	26002421	1	9.94056e-26	6:A>T	6	1	0.851064	0.712766	0.287234	0.148936	0.56383	0.253508	0.409461	0.331485	21.0303	20.1905	1	0	2	2	0	1	2	2	2	0	2	1	0	1	0	2	2	0	1	2	2	2	2	1	0	0
7111315|F|0-11:C>T-11:C>T	TGCAGAAATTTCACAGCCCCATCGTAATTTAGGAATCCCATGAACCAAAATTCGTGAGTATCAACAGAA	TGCAGAAATTTCACAGCCCCATCGTAATTTAGGAATCCCATGAACCAAAATTCGTGAGTATCAACAGAA	scaffold08265	1299805	1	4.73568e-29	Chromosome12	28334157	1	5.18104e-29	11:C>T	11	1	0.882979	0.755319	0.244681	0.117021	0.638298	0.206655	0.369624	0.288139	7.24272	6.64368	1	1	2	2	0	1	2	2	2	0	2	2	1	2	1	0	2	0	0	2	0	2	0	2	0	2
7111312|F|0-17:A>C-17:A>C	TGCAGAAATTTCCAATAAGAAAACATCCCTATTTGCCTCGCAGAATCAATTTTACGAAAGGAAATTGTA	TGCAGAAATTTCCAATAAGAAAACATCCCTATTTGCCTCGCAGAATCAATTTTACGAAAGGAAATTGTA	scaffold05280	254760	1	4.73568e-29	Chromosome02	1799167	1	5.18104e-29	17:A>C	17	1	0.989362	0.095745	0.904255	0.010638	0.085106	0.02105	0.173155	0.097103	7.35897	5.45455	1	0	0	0	0	0	0	0	0	0	0	0	2	0	0	2	0	0	0	0	0	0	0	0	0	0
7119761|F|0-34:G>A-34:G>A	TGCAGAAATTTCCCAAAATTTTGATCATGCCAGTGCATGGAAATATGGTTGAACTTGAACTGATTTACA	TGCAGAAATTTCCCAAAATTTTGATCATGCCAGTGCATGGAAATATGGTTGAACTTGAACTGATTTACA	scaffold10899	170150	1	1.32604e-24	Chromosome14	4343036	1	1.45075e-24	34:G>A	34	0.93617	0.931818	0.159091	0.840909	0.068182	0.090909	0.127066	0.267562	0.197314	18.9135	15.2632	1	1	0	0	0	0	0	0	0	0	0	0	2	0	0	0	0	2	2	0	2	0	0	0	0	1
20484652|F|0-60:T>C-60:T>C	TGCAGAAATTTGATTGATTGTTCAAGCCGATAGGAAAGCTTTCAATTCATACTCGTTGATTCCATCAAA	TGCAGAAATTTGATTGATTGTTCAAGCCGATAGGAAAGCTTTCAATTCATACTCGTTGATTCCATCAAA	scaffold06598	294926	1	4.73568e-29	Chromosome16	518364	1	5.18104e-29	60:T>C	60	0.968085	0.989011	0.065934	0.934066	0.010989	0.054945	0.021737	0.123174	0.072455	7.0354	4	1	0	0	0	0	0	0	0	0	0	0	0	0	0	0	0	0	0	0	0	0	0	1	0	0	0
7111314|F|0-12:G>T-12:G>T	TGCAGAAATTTGGTATACTAAATTTTGGGTCATATCTTCAATAGAAGTTATAATGATATCATAATTTAG	TGCAGAAATTTGGTATACTAAATTTTGGGTCATATCTTCAATAGAAGTTATAATGATATCATAATTTAG	scaffold12436	153895	1	2.2033e-27	Chromosome12	22588081	1	2.4105e-27	12:G>T	12	1	0.776596	0.755319	0.244681	0.223404	0.531915	0.34699	0.369624	0.358307	16.5444	15.7667	1	1	1	2	0	1	2	0	2	2	2	1	2	0	0	1	2	2	2	2	0	1	2	2	1	2
7111112|F|0-8:T>A-8:T>A	TGCAGAAATTTTTGGATTATTGTATAGTGCCTGTCGCTTTCCCCTTGTCTCTCGTAATTTCGCATGTGT	TGCAGAAATTTTTGGATTATTGTATAGTGCCTGTCGCTTTCCCCTTGTCTCTCGTAATTTCGCATGTGT	scaffold11069	348632	1	4.73568e-29	Chromosome08	885705	1	5.18104e-29	8:T>A	8	1	0.968085	0.319149	0.680851	0.031915	0.287234	0.061793	0.434586	0.248189	12.2368	7.80556	1	0	2	0	0	0	0	2	0	2	0	0	0	0	2	0	0	0	0	0	0	0	2	0	1	0
7125399|F|0-20:G>T-20:G>T	TGCAGAACAAAAAAAACTAAGGATACATAAGAGATGCAAAAGGTTAGTAATCTTGCTAATTATATTAGG	TGCAGAACAAAAAAAACTAAGGATACATAAGAGATGCAAAAGGTTAGTAATCTTGCTAATTATATTAGG	scaffold00772	539523	1	2.2033e-27	Chromosome07	4011535	1	2.4105e-27	20:G>T	20	0.893617	0.940476	0.178571	0.821429	0.059524	0.119048	0.111961	0.293367	0.202664	22.6566	10.0435	1	2	0	2	0	0	0	0	0	0	0	2	-	2	2	0	0	1	0	0	1	0	0	1	0	0
7111322|F|0-10:A>G-10:A>G	TGCAGAACAAAATCATCAATTTGTTTCTCACCAATTGATGCAAGGTTATTAGTCATTAGTCAACACAGC	TGCAGAACAAAATCATCAATTTGTTTCTCACCAATTGATGCAAGGTTATTAGTCATTAGTCAACACAGC	scaffold06656	1051698	1	2.2033e-27	Chromosome06	19744721	1	2.4105e-27	10:A>G	10	1	0.968085	0.617021	0.382979	0.031915	0.585106	0.061793	0.472612	0.267202	19.0702	15.7917	1	2	0	0	0	0	2	2	2	0	2	0	0	0	2	2	2	0	0	1	2	2	2	2	2	0
7111325|F|0-15:G>A-15:G>A	TGCAGAACAAAGACAGAAATGTGTCATTGAGCAGCTGTAATTATGAAATAGCCAAGGAATTCAAGAAAA	TGCAGAACAAAGACAGAAATGTGTCATTGAGCAGCTGTAATTATGAAATAGCCAAGGAATTCAAGAAAA	scaffold02688	340323	1	4.73568e-29	Chromosome11	8875121	1	5.18104e-29	15:G>A	15	1	1	0.06383	0.93617	0	0.06383	0	0.119511	0.059756	12.0085	4.66667	1	0	0	0	0	0	0	0	0	0	0	0	0	0	0	0	0	0	0	0	0	0	0	0	0	0
7123648|F|0-28:T>A-28:T>A	TGCAGAACAAATTTTCTAGTGAGCTATCTTCTTTCTTGTTACTTCAAAAGCATTTTGCTTTCACTTTAC	TGCAGAACAAATTTTCTAGTGAGCTATCTTCTTTCTTGTTACTTCAAAAGCATTTTGCTTTCACTTTAC	scaffold08617	198709	1	7.92447e-27	Chromosome03	15737983	1	8.66972e-27	28:T>A	28	1	0.840426	0.787234	0.212766	0.159574	0.62766	0.268221	0.334993	0.301607	16.9	16.2021	1	2	2	2	0	0	2	2	2	2	2	2	1	1	2	2	2	1	0	2	2	2	2	2	0	2
7111328|F|0-5:C>A-5:C>A	TGCAGCACAACAAATTATCAGGAAACATCCCCAAGTCCTTGGGTCAGCTATCTAATCTTCAAACATTTC	TGCAGCACAACAAATTATCAGGAAACATCCCCAAGTCCTTGGGTCAGCTATCTAATCTTCAAACATTTC	scaffold07444	400225	1	4.73568e-29	Chromosome10	19245505	1	5.18104e-29	5:C>A	5	1	0.840426	0.510638	0.489362	0.159574	0.351064	0.268221	0.499774	0.383997	10.5051	8.78689	1	0	0	0	1	2	0	2	0	1	0	2	2	0	2	2	0	0	1	2	0	1	0	2	2	0
7122585|F|0-36:C>A-36:C>A	TGCAGAACAACCCTCGAAAAGCATATTACTGAGCAACCTCATTGAAGCTTAGGTGTTTGATGGAAAATA	TGCAGAACAACCCTCGAAAAGCATATTACTGAGCAACCTCATTGAAGCTTAGGTGTTTGATGGAAAATA	scaffold06407	184123	2	4.73568e-29	Chromosome10	25698098	2	5.18104e-29	36:C>A	36	1	0.861702	0.787234	0.212766	0.138298	0.648936	0.238343	0.334993	0.286668	9.82	8.29787	1	2	0	2	1	2	2	2	2	1	2	0	0	2	2	1	2	2	2	2	2	1	1	0	2	0
20484660|F|0-5:A>G-5:A>G	TGCAGAACAAGAACATGGAGAGAACTGATACACATTTTTCATATTTTTCACAGCTTACTTATCTCACCA	TGCAGAACAAGAACATGGAGAGAACTGATACACATTTTTCATATTTTTCACAGCTTACTTATCTCACCA	scaffold01828	158171	1	4.73568e-29	Chromosome13	22448009	1	5.18104e-29	5:A>G	5	1	1	0.117021	0.882979	0	0.117021	0	0.206655	0.103327	17.8729	7.42857	1	0	0	2	0	0	0	2	0	0	0	0	0	0	2	0	0	0	0	0	0	0	0	0	0	0
7106950|F|0-27:T>C-27:T>C	TGCAGAACAAGCTTATTACAGTCACTCTGGACACTAAAGTTCTGCGGGCAATGCAATTGATGACAGGTA	TGCAGAACAAGCTTATTACAGTCACTCTGGACACTAAAGTTCTGCGGGCAATGCAATTGATGACAGGTA	scaffold09709	204602	1	2.2033e-27	Chromosome02	21557440	1	2.4105e-27	27:T>C	27	1	0.829787	0.787234	0.212766	0.170213	0.617021	0.282481	0.334993	0.308737	15.8936	20.2903	1	0	1	1	2	2	2	2	2	0	2	1	1	1	0	1	2	2	1	0	2	1	0	2	2	2
20484664|F|0-13:C>T-13:C>T	TGCAGAACAATAACGGTTCACAAAAGATCTCAGGTGAAGCTCTCAAGGACCTCTACAAGTCATTTGTAT	TGCAGAACAATAACGGTTCACAAAAGATCTCAGGTGAAGCTCTCAAGGACCTCTACAAGTCATTTGTAT	scaffold06550	256022	1	4.73568e-29	Chromosome08	1858764	1	5.18104e-29	13:C>T	13	0.978723	0.978261	0.097826	0.902174	0.021739	0.076087	0.042533	0.176512	0.109523	5.96491	3.3	1	0	0	0	0	0	0	0	0	0	0	0	0	0	0	0	0	0	0	0	0	0	0	0	2	0
7111338|F|0-48:A>T-48:A>T	TGCAGAACAATCCTACAATTTGCATCTCATATAATCTAGCAATTCAGAAAGCAAATCATCATAAAAGAA	TGCAGAACAATCCTACAATTTGCATCTCATATAATCTAGCAATTCAGAAAGCAAATCATCATAAAAGAA	scaffold02264	634846	1	2.2033e-27	Chromosome09	28799033	1	2.4105e-27	48:A>T	48	1	0.670213	0.765957	0.234043	0.329787	0.43617	0.442055	0.358533	0.400294	13.8193	13.9659	1	2	0	2	0	2	1	0	1	0	1	2	2	2	2	0	1	2	0	2	2	2	0	2	0	2
20492965|F|0-44:C>T-44:C>T	TGCAGAACACAAAAACAATAAAATAAAAGCATAATCTGACTAAGCTAGCACTGTCAATGAGTTTACAGA	TGCAGAACACAAAAACAATAAAATAAAAGCATAATCTGACTAAGCTAGCACTGTCAATGAGTTTACAGA	scaffold01092	13414	1	7.92447e-27	Chromosome12	23127924	1	8.66972e-27	44:C>T	44	1	1	0.095745	0.904255	0	0.095745	0	0.173155	0.086578	27.5932	12.6364	1	0	0	0	0	0	0	0	0	2	0	0	0	0	0	0	0	0	0	0	0	0	2	0	0	0
7106951|F|0-13:G>C-13:G>C	TGCAGAACACAAGGTATGATCTTCAGATATAAATTACAAAACAAAAAGGGTAAAAGATAGCAATATTTT	TGCAGAACACAAGGTATGATCTTCAGATATAAATTACAAAACAAAAAGGGTAAAAGATAGCAATATTTT	scaffold03352	23992	1	4.73568e-29	Chromosome05	6887271	1	5.18104e-29	13:G>C	13	1	0.787234	0.595745	0.404255	0.212766	0.382979	0.334993	0.481666	0.40833	10.3936	10.2817	1	1	1	2	2	2	0	1	0	2	0	0	0	0	1	0	0	2	0	2	2	2	2	2	2	0
7117560|F|0-35:A>G-35:A>G	TGCAGAACACACAAATTGGTGGCAAGTGAATGTGAATCTTCACATGATTGTTTAGAACCTTACAGATCG	TGCAGAACACACAAATTGGTGGCAAGTGAATGTGAATCTTCACATGATTGTTTAGAACCTTAC	scaffold05335	679668	1	1.52046e-23	Chromosome17	25625779	1	1.62076e-23	35:A>G	35	1	0.787234	0.861702	0.138298	0.212766	0.648936	0.334993	0.238343	0.286668	11.1868	17.402	1	0	2	2	1	2	2	2	2	2	2	2	2	2	0	1	2	1	2	2	1	1	1	0	1	2
7119765|F|0-23:A>G-23:A>G	TGCAGAACACTAAAAGTGGTAATAAAAATTCATAGATAATAACAAGGAAAGGAACTTACCTCTGGGTTT	TGCAGAACACTAAAAGTGGTAATAAAAATTCATAGATAATAACAAGGAAAGGAACTTACCTCTGGGTTT	scaffold12753	39723	1	2.2033e-27	Chromosome16	1038314	1	2.4105e-27	23:A>G	23	1	0.670213	0.882979	0.117021	0.329787	0.553191	0.442055	0.206655	0.324355	18.3	25.2843	1	1	1	1	0	1	2	2	2	0	2	1	2	1	1	2	2	2	2	0	0	2	2	2	0	1
20484672|F|0-7:C>A-7:C>A	TGCAGAACAGACACATAGGAGAGACCCTCTTGAACATTTCAATTATTATACAGGTGGTTGGGATTACAG	TGCAGAACAGACACATAGGAGAGACCCTCTTGAACATTTCAATTATTATACAGGTGGTTGGGATTACAG	scaffold09492	346552	1	4.73568e-29	Chromosome04	24266525	1	5.18104e-29	7:C>A	7	1	1	0.212766	0.787234	0	0.212766	0	0.334993	0.167497	5.82203	3.15385	1	0	0	0	0	2	0	2	0	2	0	0	0	0	2	0	0	0	0	0	0	0	2	0	2	0
7146723|F|0-46:A>G-46:A>G	TGCAGAACAGCAAATTCTGGTAAAAACATACTCTCTTCTCATAATTATCATATGCTATAATCTTGCTGG	TGCAGAACAGCAAATTCTGGTAAAAACATACTCTCTTCTCATAATTATCATATGCTATAATCTTGCTGG	scaffold06512	1439310	1	4.73568e-29	Chromosome02	8392355	1	5.18104e-29	46:A>G	46	0.989362	1	0.064516	0.935484	0	0.064516	0	0.120708	0.060354	6.99145	3.14286	1	0	0	0	0	2	0	0	0	0	0	0	0	0	0	0	0	0	0	0	0	0	0	0	0	0
7106952|F|0-36:C>T-36:C>T	TGCAGAACAGCAAATTTTGGTAAAAACATTCTCTCTCCTCAGGATTATTGTATAATATAATCTTGCTGG	TGCAGAACAGCAAATTTTGGTAAAAACATTCTCTCTCCTCAGGATTATTGTATAATATAATCTTGCTGG	scaffold07520	2624187	1	4.73568e-29	Chromosome01	26245720	1	5.18104e-29	36:C>T	36	0.968085	1	0.252747	0.747253	0	0.252747	0	0.377732	0.188866	11.1565	5.21875	1	0	2	2	0	0	0	2	0	0	0	0	2	0	2	2	0	0	2	0	0	2	2	0	0	0
7111350|F|0-8:A>T-8:A>T	TGCAGAACAGCAAGTGGCAATGCATGTGAAATTACTCAATGTGCCCTTCTCTCTCCAAGTATATATATA	TGCAGAACAGCAAGTGGCAATGCATGTGAAATTACTCAATGTGCCCTTCTCTCTCCAAGTATATATATA	scaffold06278	21051	1	4.73568e-29	Chromosome03	23311121	1	5.18104e-29	8:A>T	8	1	1	0.138298	0.861702	0	0.138298	0	0.238343	0.119172	10.2542	7.27778	1	2	2	0	0	0	0	0	0	0	0	0	0	2	0	0	0	2	0	0	0	0	0	2	0	0
7128159|F|0-30:G>A-30:G>A	TGCAGAACAGCAATACATACATGTGTGTGTGCGCGTGTGCAAGAGAGGAAATGTTCAAGAAATGGAATC	TGCAGAACAGCAATACATACATGTGTGTGTGCGCGTGTGCAAGAGAGGAAATGTTCAAGAAATGGAATC	scaffold03268	244597	1	6.12599e-28	Chromosome06	15273352	1	6.7021e-28	30:G>A	30	0.914894	0.976744	0.034884	0.965116	0.023256	0.011628	0.04543	0.067334	0.056382	10.6415	8.5	1	0	0	0	0	0	0	0	0	0	0	0	0	0	0	0	0	0	0	1	0	0	0	-	0	0
7111351|F|0-17:T>C-17:T>C	TGCAGAACAGCAATAGGTAATGATGTATCAAAGCCACAAAGGCAGCATAAGTAAATCAGTAATATGACT	TGCAGAACAGCAATAGGTAATGATGTATCAAAGCCACAAAGGCAGCATAAGTAAATCAGTAATATGACT	scaffold00889	169239	1	4.73568e-29	Chromosome05	11478792	1	5.18104e-29	17:T>C	17	0.989362	1	0.225806	0.774194	0	0.225806	0	0.349636	0.174818	12.0256	7.23077	1	0	0	0	2	2	0	0	0	2	0	0	0	0	2	0	0	0	0	0	0	0	0	0	2	0
7146724|F|0-27:C>A-27:C>A	TGCAGAACAGCAGATGTATCATAGCCACAGAGGCAACATATGATAAATCTGTTTTGTGACTTCATCATA	TGCAGAACAGCAGATGTATCATAGCCACAGAGGCAACATATGATAAATCTGTTTTGTGACTTCATCATA	scaffold07762	233681	1	2.2033e-27	Chromosome01	3720465	1	2.4105e-27	27:C>A	27	0.989362	1	0.172043	0.827957	0	0.172043	0	0.284888	0.142444	9.23077	4.86364	1	0	0	2	0	0	0	2	0	0	0	2	2	0	2	0	0	0	0	0	2	0	0	0	0	0
7139058|F|0-14:G>C-14:G>C	TGCAGAACAGTATCGGAGGAGTAATCATCAGGCACTCGGATTTCACCGACTCCACCATCTAAGAATGAG	TGCAGAACAGTATCGGAGGAGTAATCATCAGGCACTCGGATTTCACCGACTCCACCATCTAAGAATGAG	scaffold07571	788322	1	4.73568e-29	Chromosome01	31260658	1	5.18104e-29	14:G>C	14	1	0.691489	0.840426	0.159574	0.308511	0.531915	0.426664	0.268221	0.347442	8.58621	7.13402	1	1	2	2	0	2	2	2	2	0	2	2	2	1	2	2	2	2	2	0	2	0	2	0	0	2
7125414|F|0-47:C>T-47:C>T	TGCAGAACAGTTCAAAACAATTACAATTCTAAGCATAACGATTACAACTCTAAGTGACGAGAGCACCTG	TGCAGAACAGTTCAAAACAATTACAATTCTAAGCATAACGATTACAACTCTAAGTGACGAGAGCACCTG	scaffold04681	331865	1	4.73568e-29	Chromosome14	374977	1	5.18104e-29	47:C>T	47	1	0.989362	0.074468	0.925532	0.010638	0.06383	0.02105	0.137845	0.079448	15.8034	11.8571	1	0	0	0	0	0	0	0	0	0	0	0	0	0	0	0	0	0	0	0	0	0	0	0	0	0
7146729|F|0-5:A>C-5:A>C	TGCAGAACATAATGCTGCTTTGCAATGTGAAGCAGTTGCAGAAGCACCTGCTGGTCTCCATGATGTGCC	TGCAGAACATAATGCTGCTTTGCAATGTGAAGCAGTTGCAGAAGCACCTGCTGGTCTCCATGATGTGCC	scaffold03332	617874	1	4.73568e-29	Chromosome15	4388083	1	5.18104e-29	5:A>C	5	1	1	0.042553	0.957447	0	0.042553	0	0.081485	0.040742	10.161	3.75	1	0	0	0	0	0	0	0	0	0	0	0	0	0	0	0	0	0	0	0	0	0	0	0	0	0
7123621|F|0-46:C>T-46:C>T	TGCAGAACATAGGAACCAATATGCCTACAGGATAATATTCCTATTACGTAGGAATTTTATCATCACTTT	TGCAGAACATAGGAACCAATATGCCTACAGGATAATATTCCTATTACGTAGGAATTTTATCATCACTTT	scaffold03883	368970	1	2.2033e-27	Chromosome10	5296510	1	2.4105e-27	46:C>T	46	0.989362	0.569892	0.741935	0.258065	0.430108	0.311828	0.49023	0.382934	0.436582	22.6615	24.2118	1	0	0	2	0	1	1	0	1	0	1	1	0	1	2	0	1	1	2	1	1	2	-	1	2	1
7106955|F|0-65:A>C-65:A>C	TGCAGAACATATCAGTGGAGGTCCTCCTTGTCCTGGAATGGAGAGGTCAGAACTTAGAACAATATATGG	TGCAGAACATATCAGTGGAGGTCCTCCTTGTCCTGGAATGGAGAGGTCAGAACTTAGAACAATATATGG	scaffold07238	595205	1	4.73568e-29	Chromosome02	12783460	1	5.18104e-29	65:A>C	65	1	0.893617	0.361702	0.638298	0.106383	0.255319	0.190131	0.461747	0.325939	11.9039	9.6	1	0	1	2	2	0	0	1	0	2	0	0	2	0	2	1	0	2	2	0	0	2	0	0	0	0
7111361|F|0-55:T>C-55:T>C	TGCAGAACATATCTTTGTCTGTCAATGATCTCTTGGCATGCTGTGGATTTATGTGTGGAGATGGTTGTG	TGCAGAACATATCTTTGTCTGTCAATGATCTCTTGGCATGCTGTGGATTTATGTGTGGAGATGGTTGTG	scaffold07571	233383	2	2.2033e-27	Chromosome01	31799106	2	2.4105e-27	55:T>C	55	1	0.968085	0.531915	0.468085	0.031915	0.5	0.061793	0.497963	0.279878	7.62609	4.87097	1	0	0	0	2	0	2	0	2	2	2	0	2	0	0	2	2	0	0	2	0	2	0	2	2	2
20471086|F|0-50:A>T-50:A>T	TGCAGAACATATGAATTTTCAAATGTCAAGTTAGTCCTAGGCAGGTTATCAACCTATACTGATCAGATA	TGCAGAACATATGAATTTTCAAATGTCAAGTTAGTCCTAGGCAGGTTATCAACCTATACTGATCAGATA	scaffold12794	1542069	1	2.2033e-27	Chromosome06	20820613	1	2.4105e-27	50:A>T	50	1	0.989362	0.042553	0.957447	0.010638	0.031915	0.02105	0.081485	0.051268	5.7913	2.75	1	0	0	0	0	0	0	0	0	0	0	0	0	0	0	0	0	0	0	0	0	0	2	0	0	0
7146734|F|0-15:C>A-15:C>A	TGCAGAACATCAGGACGGGTCTTCGAGGTGACTCTGTGGTTCTCATGGGAAAGAATACCATGATGAAGA	TGCAGAACATCAGGACGGGTCTTCGAGGTGACTCTGTGGTTCTCATGGGAAAGAATACCATGATGAAGA	scaffold08265	2676986	2	4.73568e-29	Chromosome07	25247636	2	5.18104e-29	15:C>A	15	1	1	0.031915	0.968085	0	0.031915	0	0.061793	0.030896	9.30508	4	1	0	0	0	0	0	0	0	0	0	0	0	0	0	0	0	0	0	0	0	0	0	0	0	0	0
7106957|F|0-17:C>T-17:C>T	TGCAGAACATGCTTCACCTTGAAGCCTCTAGTTCTAGCATTTCTACTCGAAGTCCGTTTGATCATGATG	TGCAGAACATGCTTCACCTTGAAGCCTCTAGTTCTAGCATTTCTACTCGAAGTCCGTTTGATCATGATG	scaffold08107	167806	1	4.73568e-29	Chromosome07	5323095	1	5.18104e-29	17:C>T	17	1	0.946809	0.276596	0.723404	0.053191	0.223404	0.100724	0.400181	0.250453	13	8	1	2	0	2	1	0	0	0	0	0	0	2	0	0	0	0	0	2	0	0	2	2	0	2	1	0
7119767|F|0-27:C>T-27:C>T	TGCAGAACATTATTATTTTGCAGCTAGCAAATTTGAAGTCTAAAGTGCTTATGCGTTGCCACACTACAA	TGCAGAACATTATTATTTTGCAGCTAGCAAATTTGAAGTCTAAAGTGCTTATGCGTTGCCACACTACAA	scaffold04043	1051449	1	4.73568e-29	Chromosome02	4731645	1	5.18104e-29	27:C>T	27	1	1	0.404255	0.595745	0	0.404255	0	0.481666	0.240833	26.9576	15.1875	1	2	0	0	0	0	2	0	2	0	2	2	0	2	2	0	2	2	0	2	0	0	0	0	0	2
13855246|F|0-25:C>G-25:C>G	TGCAGAACCAAAAGTTCATATGAAACAGAGTAAAATCATACTGAAATAAGGGGCTTTTTTTACAGATCG	TGCAGAACCAAAAGTTCATATGAAACAGAGTAAAATCATACTGAAATAAGGGGCTTTTTTTAC	scaffold06261	43646	1	3.26801e-25	Chromosome04	17592519	1	3.48359e-25	25:C>G	25	1	1	0.191489	0.808511	0	0.191489	0	0.309642	0.154821	27.0424	16.087	1	0	0	0	0	0	0	2	0	2	0	0	0	0	2	0	0	0	0	0	0	2	0	0	2	0
7111373|F|0-24:G>T-24:G>T	TGCAGAACCAACAAAGGAAGAAAAGAAATTTCTTTTCAGTATCAATTATGCATCAAAACAATGCCAAAA	TGCAGAACCAACAAAGGAAGAAAAGAAATTTCTTTTCAGTATCAATTATGCATCAAAACAATGCCAAAA	scaffold12120	111506	1	4.73568e-29	Chromosome15	24489139	1	5.18104e-29	24:G>T	24	1	0.56383	0.893617	0.106383	0.43617	0.457447	0.491852	0.190131	0.340991	10.0156	11.1402	1	2	1	2	2	1	1	2	1	2	1	1	2	1	1	2	1	1	0	1	2	1	1	2	2	2
20501862|F|0-10:G>A-10:G>A	TGCAGAACCAGCACTTTTACTAGATAGTGGTACTTTTGGTAGCCATGTGGGTGGAAAAGAACTTTACAG	TGCAGAACCAGCACTTTTACTAGATAGTGGTACTTTTGGTAGCCATGTGGGTGGAAAAGAACTTTACAG	scaffold05019	196865	1	2.2033e-27	Chromosome03	27265225	1	2.4105e-27	10:G>A	10	1	1	0.095745	0.904255	0	0.095745	0	0.173155	0.086578	44.6271	21.5833	1	0	0	2	0	0	0	2	0	0	0	0	0	0	0	0	0	0	0	0	0	0	2	0	0	0
13855353|F|0-61:G>A-61:G>A	TGCAGAACCAACAGACAAGCTTCATGGCAGACTCAGACTCCACAAAAAAGACAAAGAGCTTGTATTCAA	TGCAGAACCAACAGACAAGCTTCATGGCAGACTCAGACTCCACAAAAAAGACAAAGAGCTTGTATTCAA	scaffold01441	146917	1	4.73568e-29	Chromosome05	28000248	1	5.18104e-29	61:G>A	61	1	0.968085	0.43617	0.56383	0.031915	0.404255	0.061793	0.491852	0.276822	28.5877	18.6154	1	0	0	0	0	0	2	0	2	0	2	0	2	1	0	0	2	2	2	2	2	0	0	2	0	0
7111376|F|0-16:T>A-16:T>A	TGCAGAACCAAGCCAATGTAGTTCGGATCAGCAAGCATCCATATCTGAAGTCATTTAGAGAAGAGGAGC	TGCAGAACCAAGCCAATGTAGTTCGGATCAGCAAGCATCCATATCTGAAGTCATTTAGAGAAGAGGAGC	scaffold07520	1010585	1	4.73568e-29	Chromosome01	24653312	1	5.18104e-29	16:T>A	16	1	1	0.06383	0.93617	0	0.06383	0	0.119511	0.059756	6.94068	4	1	0	0	0	0	0	0	0	0	0	0	2	0	0	2	0	0	2	0	0	0	0	0	0	0	0
7111378|F|0-47:G>C-47:G>C	TGCAGAACCACTAAAAGAACCTGAGACATTTTATTTGTAAACCCAAAGAATGTTACTGTCTCCTCTGCG	TGCAGAACCACTAAAAGAACCTGAGACATTTTATTTGTAAACCCAAAGAATGTTACTGTCTCCTCTGCG	scaffold12794	542002	1	2.2033e-27	Chromosome06	21834833	1	2.4105e-27	47:G>C	47	1	0.968085	0.234043	0.765957	0.031915	0.202128	0.061793	0.358533	0.210163	16.5304	9.29167	1	0	0	0	0	0	0	0	0	0	0	0	2	0	0	0	0	0	0	0	0	0	2	0	0	0
7106960|F|0-66:A>T-66:A>T	TGCAGAACCACTAACTAAAGAGGATCTTGTAGGATACCTTGCCTCTGGCTGCAAGCCTAAGGAAAAATG	TGCAGAACCACTAACTAAAGAGGATCTTGTAGGATACCTTGCCTCTGGCTGCAAGCCTAAGGAAAAATG	scaffold12946	273404	2	4.73568e-29	Chromosome01	18227830	2	5.18104e-29	66:A>T	66	0.989362	0.946237	0.096774	0.903226	0.053763	0.043011	0.101746	0.174818	0.138282	17.7431	13.0714	1	0	0	0	1	0	0	0	0	2	0	0	0	0	0	1	0	0	0	0	0	2	0	0	1	0
7106961|F|0-52:T>A-52:T>A	TGCAGAACCACTAATGCACCGTATGGTGAAGTACTTGGCTCTTGCCTCCAACTTGAAAAACAAAGATGG	TGCAGAACCACTAATGCACCGTATGGTGAAGTACTTGGCTCTTGCCTCCAACTTGAAAAACAAAGATGG	scaffold04137	340202	1	2.2033e-27	Chromosome15	11995531	1	2.4105e-27	52:T>A	52	1	0.595745	0.712766	0.287234	0.404255	0.308511	0.481666	0.409461	0.445564	20.3425	18.241	1	2	2	2	2	0	1	0	1	0	1	2	2	1	0	0	1	1	0	2	2	0	2	1	0	2
7111380|F|0-6:A>G-6:A>G	TGCAGAACCACTACCAAATATCTGTTGATAGTAATACTCGATCAATTTTATCTTGAATCGAGGATCTAA	TGCAGAACCACTACCAAATATCTGTTGATAGTAATACTCGATCAATTTTATCTTGAATCGAGGATCTAA	scaffold07520	805735	1	4.73568e-29	Chromosome01	24442320	1	5.18104e-29	6:A>G	6	0.989362	1	0.075269	0.924731	0	0.075269	0	0.139207	0.069603	8.50427	4.5	1	0	0	0	0	0	0	0	0	0	0	2	0	0	2	0	0	2	0	0	0	0	0	0	0	0
7106962|F|0-45:C>A-45:C>A	TGCAGAACCAGAATAAACTCATAATACTAATAATAATAACACCAACAAATAGATTATATAACCTTACAG	TGCAGAACCAGAATAAACTCATAATACTAATAATAATAACACCAACAAATAGATTATATAACCTTACAG	scaffold02196	348146	1	2.2033e-27	Chromosome04	25421164	1	2.4105e-27	45:C>A	45	0.989362	0.913978	0.247312	0.752688	0.086022	0.16129	0.157244	0.372297	0.26477	9.95238	4.9375	1	0	2	2	0	0	0	1	0	2	0	0	2	0	1	1	0	0	2	0	0	2	0	0	0	0
7111385|F|0-65:C>T-65:C>T	TGCAGAACCAGCAAAGTTGTCTGTATCACTGACAAATTAGCCACAACATAATATAATGATGCTGACTTT	TGCAGAACCAGCAAAGTTGTCTGTATCACTGACAAATTAGCCACAACATAATATAATGATGCTGACTTT	scaffold08847	325578	1	4.73568e-29	Chromosome17	22543591	1	5.18104e-29	65:C>T	65	1	0.946809	0.244681	0.755319	0.053191	0.191489	0.100724	0.369624	0.235174	19.7838	14.2857	1	0	0	0	2	0	0	0	0	2	0	0	0	0	0	0	0	1	0	0	0	0	1	0	2	0
7146759|F|0-24:C>A-24:C>A	TGCAGAACCATGGCTGATCGTATCCAATCTGTCAGAGAGCTAGATGTGTATAAATCATGAGATGATGGT	TGCAGAACCATGGCTGATCGTATCCAATCTGTCAGAGAGCTAGATGTGTATAAATCATGAGATGATGGT	scaffold07238	456141	1	4.73568e-29	Chromosome02	12625411	1	5.18104e-29	24:C>A	24	0.968085	0.978022	0.186813	0.813187	0.021978	0.164835	0.04299	0.303828	0.173409	11.9732	6.4	1	-	0	0	2	0	0	0	0	2	0	0	0	0	0	0	0	0	0	0	0	0	0	0	2	0
7106966|F|0-19:T>C-19:T>C	TGCAGAACCCAATACAATGTATGAAGAGAGAAATCTCAATTGTCATCGTCATGGAGAAATCGAAACCCA	TGCAGAACCCAATACAATGTATGAAGAGAGAAATCTCAATTGTCATCGTCATGGAGAAATCGAAACCCA	scaffold02311	14772	1	1.0251e-25	Chromosome10	22162070	1	1.1215e-25	19:T>C	19	0.978723	0.858696	0.369565	0.630435	0.141304	0.228261	0.242675	0.465974	0.354324	10.6633	8.47727	1	0	2	-	1	0	0	1	0	2	0	0	1	0	2	2	0	0	0	0	0	1	2	0	2	0
20484697|F|0-58:C>T-58:C>T	TGCAGAACCCAGTTCAAAAATCCGTCAATAGATATATTTGAATCAGAATTCAACATTTCATATCTGGGA	TGCAGAACCCAGTTCAAAAATCCGTCAATAGATATATTTGAATCAGAATTCAACATTTCATATCTGGGA	scaffold06512	32318	1	4.73568e-29	Chromosome02	6953946	1	5.18104e-29	58:C>T	58	0.989362	0.989247	0.27957	0.72043	0.010753	0.268817	0.021274	0.402821	0.212048	12.5172	6.82857	1	0	0	2	0	2	0	2	0	2	0	0	2	0	2	0	0	2	0	0	0	2	2	0	0	0
7111396|F|0-7:C>T-7:C>T	TGCAGAACCCGGGAGAGAGAGTGGATCTGCACAATGACTCAAATCCTGATCTATTATGCATTTCCCAAA	TGCAGAACCCGGGAGAGAGAGTGGATCTGCACAATGACTCAAATCCTGATCTATTATGCATTTCCCAAA	scaffold10648	24841	1	2.2033e-27	Chromosome17	17214223	1	2.4105e-27	7:C>T	7	1	0.93617	0.319149	0.680851	0.06383	0.255319	0.119511	0.434586	0.277048	10.8	7.22222	1	0	2	0	0	0	0	0	0	1	0	0	0	0	0	1	0	0	0	2	0	0	2	0	2	1
7146763|F|0-9:C>T-9:C>T	TGCAGAACCCGTCCCATACTTGACATTTGATGAGGCTGCTGAACTTGCATATTTTGGTGCACAGGTATT	TGCAGAACCCGTCCCATACTTGACATTTGATGAGGCTGCTGAACTTGCATATTTTGGTGCACAGGTATT	scaffold02688	112201	1	4.73568e-29	Chromosome11	9090525	1	5.18104e-29	9:C>T	9	1	0.989362	0.106383	0.893617	0.010638	0.095745	0.02105	0.190131	0.105591	5.37391	3.16667	1	0	0	0	0	0	0	0	0	2	0	0	0	0	0	2	0	0	0	0	0	0	0	0	0	0
7146764|F|0-47:C>T-47:C>T	TGCAGAACCCGTGCTTGGATAGCTCCGTGGGTCACCTCCAGGGATTGCTGGGTAAGTTTTCACCACCTT	TGCAGAACCCGTGCTTGGATAGCTCCGTGGGTCACCTCCAGGGATTGCTGGGTAAGTTTTCACCACCTT	scaffold07012	741145	1	4.73568e-29	Chromosome18	1321885	1	5.18104e-29	47:C>T	47	1	1	0.202128	0.797872	0	0.202128	0	0.322544	0.161272	9.38983	4.91667	1	0	2	0	2	0	0	0	0	2	0	0	2	0	0	0	0	0	0	0	2	0	0	0	0	0
7143073|F|0-23:C>A-23:C>A	TGCAGAACCCTTCAATAACAAATCTTCAGTTTGGTTCATTTATAACCTGCTTGTGCCACATGCAGCTTT	TGCAGAACCCTTCAATAACAAATCTTCAGTTTGGTTCATTTATAACCTGCTTGTGCCACATGCAGCTTT	scaffold04043	1599294	1	4.73568e-29	Chromosome02	4079646	1	5.18104e-29	23:C>A	23	1	1	0.138298	0.861702	0	0.138298	0	0.238343	0.119172	11.822	5.72222	1	0	0	2	0	0	0	2	0	0	0	0	2	0	2	0	0	0	0	0	0	2	0	0	0	0
13858585|F|0-53:C>T-53:C>T	TGCAGAACCCTTTTCTGGTAATCTCAAAAACTGTTGAGAGTGGGATCCCTATTCCTGTGTGTAAAACGG	TGCAGAACCCTTTTCTGGTAATCTCAAAAACTGTTGAGAGTGGGATCCCTATTCCTGTGTGTAAAACGG	scaffold09876	713338	2	2.2033e-27	Chromosome14	3557466	2	2.4105e-27	53:C>T	53	1	1	0.12766	0.87234	0	0.12766	0	0.222725	0.111363	22.1356	11.3333	1	0	0	0	0	0	0	0	0	0	0	0	0	0	0	0	0	0	0	0	0	0	0	0	0	0
7106967|F|0-15:A>T-15:A>T	TGCAGAACCTAATCCAGACAGTCCCCTCAACAGCTATGCTGCAAGATTGTGGAATAATAAGGAAGGTCA	TGCAGAACCTAATCCAGACAGTCCCCTCAACAGCTATGCTGCAAGATTGTGGAATAATAAGGAAGGTCA	scaffold00271	40980	1	4.73568e-29	Chromosome10	4152238	1	5.18104e-29	15:A>T	15	1	1	0.212766	0.787234	0	0.212766	0	0.334993	0.167497	8.52542	4.65385	1	2	0	0	0	0	0	0	0	0	0	0	0	2	0	0	0	2	2	0	0	0	2	2	0	2
13855361|F|0-57:T>G-57:T>G	TGCAGAACCTCCAAGTGTTGGAAGACCAAAGTGAATTATGTACTCAGAATCGACAATTCCGATGTTCTT	TGCAGAACCTCCAAGTGTTGGAAGACCAAAGTGAATTATGTACTCAGAATCGACAATTCCGATGTTCTT		0	0	999	Chromosome12	4914336	1	5.18104e-29	57:T>G	57	1	0.882979	0.659574	0.340426	0.117021	0.542553	0.206655	0.449072	0.327863	11.3942	10.443	1	1	2	2	0	0	2	2	2	2	2	2	2	2	1	0	2	0	0	2	0	0	2	2	1	1
7138942|F|0-67:A>G-67:A>G	TGCAGAACCTCCACTTACAGCAGTGCGAAAAAGGCATCACACTCTTAGCCATGGAAATCATATGGTAAC	TGCAGAACCTCCACTTACAGCAGTGCGAAAAAGGCATCACACTCTTAGCCATGGAAATCATATGGTAAC	scaffold10173	518506	1	4.73568e-29	Chromosome15	10673381	1	5.18104e-29	67:A>G	67	1	0.968085	0.5	0.5	0.031915	0.468085	0.061793	0.5	0.280896	22.9211	12.1864	1	0	0	2	2	0	2	0	2	0	2	2	2	1	0	0	2	2	0	0	0	0	2	2	0	0
7111403|F|0-18:C>G-18:C>G	TGCAGAACCTGATGGTATCAACTTTTGCAGAATCTGATGATTTATCTTTTCTGCATCAGTTTCATTTGT	TGCAGAACCTGATGGTATCAACTTTTGCAGAATCTGATGATTTATCTTTTCTGCATCAGTTTCATTTGT	scaffold11495	732252	1	4.73568e-29	Chromosome01	28905574	1	5.18104e-29	18:C>G	18	1	1	0.297872	0.702128	0	0.297872	0	0.418289	0.209144	23.1864	13.8718	1	0	2	2	2	0	0	2	0	0	0	0	2	0	2	2	0	0	2	0	0	2	2	0	2	0
7122593|F|0-9:T>A-9:T>A	TGCAGAACCTTCGCGGGAAAAAGCAGTAAAAAACCTATGGAAAATGGTATGCTCTTATAAGTGGACTAT	TGCAGAACCTTCGCGGGAAAAAGCAGTAAAAAACCTATGGAAAATGGTATGCTCTTATAAGTGGACTAT	scaffold08886	52693	1	4.73568e-29	Chromosome17	635780	1	5.18104e-29	9:T>A	9	1	1	0.223404	0.776596	0	0.223404	0	0.34699	0.173495	21.7542	9.44444	1	0	0	0	2	0	0	0	0	2	0	2	0	0	2	0	0	2	0	0	0	0	2	0	0	0
7146775|F|0-12:A>G-12:A>G	TGCAGAACCTTGACAGGCTTATGTCATATGGAATTCTATTTAGGTCTAAGCTATGGGGTAAGATGATCT	TGCAGAACCTTGACAGGCTTATGTCATATGGAATTCTATTTAGGTCTAAGCTATGGGGTAAGATGATCT	scaffold03000	15318	1	4.73568e-29	Chromosome03	21381003	1	5.18104e-29	12:A>G	12	0.93617	0.977273	0.034091	0.965909	0.022727	0.011364	0.044421	0.065857	0.055139	6.93636	4.5	1	0	0	0	0	0	0	0	0	0	0	0	0	0	0	0	0	0	0	0	0	0	0	2	0	1
7122595|F|0-48:C>T-48:C>T	TGCAGAACCTTTGCAATTCTAGCAATGTTGCTCTTTTGTTTGGGAAATCGTGTTGGAGAAGACATTGAC	TGCAGAACCTTTGCAATTCTAGCAATGTTGCTCTTTTGTTTGGGAAATCGTGTTGGAGAAGACATTGAC	scaffold05789	53271	1	4.73568e-29	Chromosome08	1463880	1	5.18104e-29	48:C>T	48	1	0.989362	0.117021	0.882979	0.010638	0.106383	0.02105	0.206655	0.113852	25.7436	9.66667	1	0	2	0	0	0	0	0	0	0	0	0	0	0	0	0	0	2	2	0	2	0	0	0	0	2
7111411|F|0-32:A>G-32:A>G	TGCAGAACGCACAACTAAAATAAGTTCCAAATAAAGCATAAAAGCATATATGTAAGAGGACATGATAAG	TGCAGAACGCACAACTAAAATAAGTTCCAAATAAAGCATAAAAGCATATATGTAAGAGGACATGATAAG	scaffold03332	1028451	1	4.73568e-29	Chromosome15	3965297	1	5.18104e-29	32:A>G	32	1	0.989362	0.308511	0.691489	0.010638	0.297872	0.02105	0.426664	0.223857	18.9402	12.3077	1	2	0	0	2	0	0	0	0	2	0	2	0	0	0	0	0	2	2	0	2	0	2	2	2	2
7106969|F|0-41:C>T-41:C>T	TGCAGAACGCATATGTATTAGTTTTCAGGAGTTGGAGGCTCCTTTTGGAAAGGGAAAGAAGTTTTAGGA	TGCAGAACGCATATGTATTAGTTTTCAGGAGTTGGAGGCTCCTTTTGGAAAGGGAAAGAAGTTTTAGGA	scaffold07358	72828	1	4.73568e-29	Chromosome05	6724225	2	5.18104e-29	41:C>T	41	0.946809	0.820225	0.460674	0.539326	0.179775	0.280899	0.294912	0.496907	0.39591	7.62637	7.34615	1	2	0	2	-	0	0	2	0	1	0	1	1	0	2	-	0	0	2	0	0	2	0	2	1	1
7110860|F|0-19:C>T-19:C>T	TGCAGAACGCATCTTCCTACTTGTCTTTTTATCTTTGTTTCACACAACAGACCATAATATCATAATAGC	TGCAGAACGCATCTTCCTACTTGTCTTTTTATCTTTGTTTCACACAACAGACCATAATATCATAATAGC	scaffold03317	63320	1	4.73568e-29	Chromosome12	5542908	1	5.18104e-29	19:C>T	19	1	0.946809	0.212766	0.787234	0.053191	0.159574	0.100724	0.334993	0.217859	18.9107	13.1667	1	0	0	0	0	0	0	2	0	0	0	0	0	0	0	0	0	0	1	0	0	2	2	0	0	0
7109741|F|0-65:A>C-65:A>C	TGCAGAACGGAGAATGGCAGCTTCTCTCGTTCGTCTTCACTTTCATGATTGCTTCGTTCAGGTATACTT	TGCAGAACGGAGAATGGCAGCTTCTCTCGTTCGTCTTCACTTTCATGATTGCTTCGTTCAGGTATACTT	scaffold08799	465185	1	4.73568e-29	Chromosome17	23597032	1	5.18104e-29	65:A>C	65	0.989362	1	0.430108	0.569892	0	0.430108	0	0.49023	0.245115	8.64957	5.87755	1	0	0	0	0	0	2	0	2	0	2	0	0	2	0	0	2	2	0	2	2	0	0	0	2	0
13855363|F|0-61:A>G-61:A>G	TGCAGAACTAATAAGTAACAGTGCCACTGTGTAAAAATAAGAAAGTAAAGAATTTACAAGTAACATTTT	TGCAGAACTAATAAGTAACAGTGCCACTGTGTAAAAATAAGAAAGTAAAGAATTTACAAGTAACATTTT	scaffold00318	486796	1	4.73568e-29	Chromosome17	21731226	1	5.18104e-29	61:A>G	61	1	1	0.06383	0.93617	0	0.06383	0	0.119511	0.059756	22.4491	9.28571	1	0	0	0	0	0	0	0	0	0	0	0	0	0	0	0	0	0	0	2	0	0	0	0	0	0
7111427|F|0-39:T>C-39:T>C	TGCAGAACTACATGTATTCCTTGGGGCCATGTCCTTTACTGGGCATTATCATATGTTTCATCAAGATTA	TGCAGAACTACATGTATTCCTTGGGGCCATGTCCTTTACTGGGCATTATCATATGTTTCATCAAGATTA	scaffold00708	129526	1	2.2033e-27	Chromosome03	28888949	1	2.4105e-27	39:T>C	39	1	0.989362	0.5	0.5	0.010638	0.489362	0.02105	0.5	0.260525	13.431	8.07143	1	2	2	0	0	0	2	0	2	0	2	0	0	0	0	0	2	1	0	2	0	0	0	0	2	0
20471133|F|0-9:C>A-9:C>A	TGCAGAACTCCTTTTTCTCATATCTATTATGAACAGTCCTCTTTATTCAAAATTTTCTTTAGATTTGAT	TGCAGAACTCCTTTTTCTCATATCTATTATGAACAGTCCTCTTTATTCAAAATTTTCTTTAGATTTGAT	scaffold03614	2439991	1	4.73568e-29	Chromosome09	26507153	1	5.18104e-29	9:C>A	9	1	0.989362	0.06383	0.93617	0.010638	0.053191	0.02105	0.119511	0.070281	22.7778	9.625	1	0	0	2	0	0	0	0	0	0	0	0	0	0	0	2	0	0	0	0	0	0	0	0	0	0
7106972|F|0-48:C>T-48:C>T	TGCAGAACTAGCTAATTGATTGGATCCTGCAAAATTAGCTAATTGGTTCTGCATGATTTGTATCCTGTA	TGCAGAACTAGCTAATTGATTGGATCCTGCAAAATTAGCTAATTGGTTCTGCATGATTTGTATCCTGTA	scaffold01347	78174	1	4.73568e-29	Chromosome15	19498345	1	5.18104e-29	48:C>T	48	0.914894	0.744186	0.476744	0.523256	0.255814	0.22093	0.380746	0.498918	0.439832	7.15854	5.51923	1	2	2	2	0	0	1	0	1	2	1	2	2	0	0	0	1	1	0	0	-	0	2	0	0	-
7146790|F|0-24:C>A-24:C>A	TGCAGAACTATATGTGAATTACACCGTTGGTTTACATTCCTGTGACTTTAGGATGAGATGAGTTATTTT	TGCAGAACTATATGTGAATTACACCGTTGGTTTACATTCCTGTGACTTTAGGATGAGATGAGTTATTTT	scaffold04882	327643	1	4.73568e-29	Chromosome01	33632725	1	5.18104e-29	24:C>A	24	0.978723	1	0.032609	0.967391	0	0.032609	0	0.063091	0.031545	17.9138	13.75	1	0	0	2	0	0	0	0	0	0	0	0	0	0	0	0	0	0	0	0	0	0	0	0	0	0
7106974|F|0-51:C>T-51:C>T	TGCAGAACTATATTTTTGAAGATGTAAACATGTAAATTATGCTATAGCGTTCCTCGCCCTGTTATTGTG	TGCAGAACTATATTTTTGAAGATGTAAACATGTAAATTATGCTATAGCGTTCCTCGCCCTGTTATTGTG	scaffold04083	280234	1	4.73568e-29	Chromosome14	5559383	1	5.18104e-29	51:C>T	51	0.87234	0.890244	0.341463	0.658537	0.109756	0.231707	0.195419	0.449732	0.322576	8.57778	6.83784	1	1	2	2	0	2	0	2	0	0	0	0	1	0	0	1	0	-	-	2	-	2	0	0	0	2
7111433|F|0-19:T>C-19:T>C	TGCAGAACTATTTCTAGTTTGATGTTTGATAATTAGTGTATTTACATTATCGCCCCCAAAAGCCCAAAG	TGCAGAACTATTTCTAGTTTGATGTTTGATAATTAGTGTATTTACATTATCGCCCCCAAAAGCCCAAAG	scaffold06916	138310	3	4.73568e-29	Chromosome02	9380360	3	5.18104e-29	19:T>C	19	1	1	0.12766	0.87234	0	0.12766	0	0.222725	0.111363	12.5932	6	1	0	0	0	0	2	0	0	0	0	0	0	0	0	2	0	0	0	0	0	0	0	2	0	0	2
13860778|F|0-43:G>A-43:G>A	TGCAGAACTCAAATAATCCAAGCAGGACCTTAGTGAGTGAATCGAACTACTTATCTTGGAGTAGATTGA	TGCAGAACTCAAATAATCCAAGCAGGACCTTAGTGAGTGAATCGAACTACTTATCTTGGAGTAGATTGA	scaffold09260	142715	1	4.73568e-29	Chromosome13	26599969	1	5.18104e-29	43:G>A	43	1	0.904255	0.659574	0.340426	0.095745	0.56383	0.173155	0.449072	0.311114	7.63889	6.32	1	0	0	0	0	1	2	2	2	0	2	2	0	2	0	2	2	2	0	0	2	2	2	0	0	1
13858588|F|0-34:C>T-34:C>T	TGCAGAACTCACTGCCATCAAAAGAAGTCATCAACATAAAAATCCAACACAAGCAAAAACATGTATAGC	TGCAGAACTCACTGCCATCAAAAGAAGTCATCAACATAAAAATCCAACACAAGCAAAAACATGTATAGC	scaffold05501	80492	1	4.73568e-29	Chromosome10	21042289	1	5.18104e-29	34:C>T	34	1	0.989362	0.095745	0.904255	0.010638	0.085106	0.02105	0.173155	0.097103	14.7778	10.1667	1	2	0	0	0	0	0	0	0	0	0	0	0	0	0	0	0	2	0	0	2	0	0	0	0	0
7106793|F|0-57:G>A-57:G>A	TGCAGAACTCACTGTGCAAAGGCTTCCGTCCATCGTACATTTCAGTTGCACACTTGTGTTTACAGATCG	TGCAGAACTCACTGTGCAAAGGCTTCCGTCCATCGTACATTTCAGTTGCACACTTGTGTTTAC	scaffold06089	301201	1	3.26801e-25	Chromosome06	25872150	1	3.48359e-25	57:G>A	57	1	1	0.361702	0.638298	0	0.361702	0	0.461747	0.230874	16.4322	10.6136	1	0	2	0	0	0	2	0	2	0	2	2	2	0	0	0	2	2	0	2	0	0	0	2	0	0
7106975|F|0-24:G>T-24:G>T	TGCAGAACTCATAAAGCTTGCCCCGATTAGAGAAAATGATAAGAGCAACCTCAGCATCACAAAGAACAG	TGCAGAACTCATAAAGCTTGCCCCGATTAGAGAAAATGATAAGAGCAACCTCAGCATCACAAAGAACAG	scaffold03803	188028	5	4.73568e-29	Chromosome05	10295625	3	5.18104e-29	24:G>T	24	1	0.893617	0.755319	0.244681	0.106383	0.648936	0.190131	0.369624	0.279878	11.3925	9.68889	1	2	2	0	2	0	2	0	2	2	2	2	2	2	0	2	2	2	2	2	2	2	0	1	2	2
7111441|F|0-47:G>A-47:G>A	TGCAGAACTCGAACAACTTGTGCTCCAGCGGAATGCCCAACAAAGTGGATTGGGTGATCCTCATCCCAT	TGCAGAACTCGAACAACTTGTGCTCCAGCGGAATGCCCAACAAAGTGGATTGGGTGATCCTCATCCCAT	scaffold04175	55237	1	4.73568e-29	Chromosome12	1856678	1	5.18104e-29	47:G>A	47	1	0.989362	0.56383	0.43617	0.010638	0.553191	0.02105	0.491852	0.256451	8.42735	5.44615	1	2	0	0	0	0	2	2	2	0	2	0	0	2	2	0	2	0	2	2	0	0	0	2	2	2
7119782|F|0-9:T>C-9:T>C	TGCAGAACTTGATAGAGAGATGGGCCTGATCCGTACACAGGAAGAAACAGGCCGGCATGTTAGGATGTT	TGCAGAACTTGATAGAGAGATGGGCCTGATCCGTACACAGGAAGAAACAGGCCGGCATGTTAGGATGTT	scaffold00271	79084	2	4.73568e-29	Chromosome10	4190993	2	5.18104e-29	9:T>C	9	1	0.595745	0.946809	0.053191	0.404255	0.542553	0.481666	0.100724	0.291195	16	19.4955	1	1	2	2	2	2	2	1	2	2	2	1	1	1	2	1	2	2	1	2	1	0	2	1	0	1
7146792|F|0-38:C>T-38:C>T	TGCAGAACTCGTTTAGCCTCAAGCATCTTACCTTTGCTCACAAGCCATCGAGGAGTTTCAGGCAAATAA	TGCAGAACTCGTTTAGCCTCAAGCATCTTACCTTTGCTCACAAGCCATCGAGGAGTTTCAGGCAAATAA	scaffold01895	28054	2	4.73568e-29	Chromosome05	15114075	2	5.18104e-29	38:C>T	38	1	1	0.053191	0.946809	0	0.053191	0	0.100724	0.050362	6.63559	4.33333	1	0	0	0	0	0	0	0	0	2	0	0	0	0	0	0	0	0	0	0	0	0	0	0	0	2
7116981|F|0-21:T>A-21:T>A	TGCAGAACTCTCAAGATGTGCTCATCTATGGCACTGATCTTGCTTGTGGTAATTCCAGGAATTACAGAT	TGCAGAACTCTCAAGATGTGCTCATCTATGGCACTGATCTTGCTTGTGGTAATTCCAGGAATTAC	scaffold05335	458264	1	2.65588e-26	Chromosome17	25404386	1	2.83471e-26	21:T>A	21	1	0.968085	0.510638	0.489362	0.031915	0.478723	0.061793	0.499774	0.280783	17.9734	13.0509	1	0	0	0	1	0	2	0	2	2	2	0	0	2	0	0	2	2	0	2	2	0	1	0	0	0
7146794|F|0-44:C>G-44:C>G	TGCAGAACTCTGAGACCTCTTGGTATGGAAGTTTGACAGCAGAACCAGATCTATCAATGATCTGGGAAC	TGCAGAACTCTGAGACCTCTTGGTATGGAAGTTTGACAGCAGAACCAGATCTATCAATGATCTGGGAAC	scaffold01012	67141	1	4.73568e-29	Chromosome05	15838827	1	5.18104e-29	44:C>G	44	1	1	0.053191	0.946809	0	0.053191	0	0.100724	0.050362	7.57627	6.66667	1	2	0	0	0	0	0	0	0	0	0	0	0	0	0	0	0	0	0	0	0	0	0	0	0	0
7116982|F|0-9:C>G-9:C>G	TGCAGAACTCTGTCATTGGCTTATATTGTCAGACATGTGAGTTGCTTCTGTCGACCTTGATATCTCTTA	TGCAGAACTCTGTCATTGGCTTATATTGTCAGACATGTGAGTTGCTTCTGTCGACCTTGATATCTCTTA	scaffold04881	20735	1	2.2033e-27	Chromosome12	5457456	1	2.4105e-27	9:C>G	9	1	0.404255	0.957447	0.042553	0.595745	0.361702	0.481666	0.081485	0.281575	15.4286	21.8246	1	2	2	2	1	2	1	1	1	2	1	1	2	2	1	2	1	1	2	2	1	1	1	2	1	2
13858589|F|0-40:G>A-40:G>A	TGCAGAACTGACAAACATGGTTATCTAGATTGACATTATAGTTGGAGAATAGTATCATGTTTGTGGTGA	TGCAGAACTGACAAACATGGTTATCTAGATTGACATTATAGTTGGAGAATAGTATCATGTTTGTGGTGA	scaffold08873	101952	1	2.2033e-27	Chromosome11	522871	1	2.4105e-27	40:G>A	40	1	0.978723	0.106383	0.893617	0.021277	0.085106	0.041648	0.190131	0.11589	19.2845	10.3846	1	2	0	0	0	0	0	0	0	0	0	0	0	0	2	0	0	0	2	0	0	0	0	0	0	0
7111447|F|0-59:T>G-59:T>G	TGCAGAACTGGAATGGAGATAAGCCAGTCCCCTTGCTGCTCCAAGTGCCACTTTCAGCCTCAAGGGCCA	TGCAGAACTGGAATGGAGATAAGCCAGTCCCCTTGCTGCTCCAAGTGCCACTTTCAGCCTCAAGGGCCA	scaffold11495	1012758	1	4.73568e-29	Chromosome01	29166161	1	5.18104e-29	59:T>G	59	1	1	0.297872	0.702128	0	0.297872	0	0.418289	0.209144	8.76271	5.23077	1	0	2	2	2	0	0	2	0	0	0	0	2	0	2	2	0	0	2	0	0	2	2	0	2	0
7106978|F|0-29:C>T-29:C>T	TGCAGAACTGGAATGGCTGGTGTTCCTGGCACAGCTAGTGCCATTTTTGGTGCTGTGAAAGATGTTGGT	TGCAGAACTGGAATGGCTGGTGTTCCTGGCACAGCTAGTGCCATTTTTGGTGCTGTGAAAGATGTTGGT	scaffold06948	456911	2	4.73568e-29	Chromosome12	31122564	2	5.18104e-29	29:C>T	29	1	0.946809	0.191489	0.808511	0.053191	0.138298	0.100724	0.309642	0.205183	14.027	10.3333	1	0	0	0	2	0	0	0	0	0	0	0	0	0	2	1	0	2	0	0	0	1	0	0	2	0
7119786|F|0-27:G>T-27:G>T	TGCAGAACTGGACAAGTAAATGGCAAGGCCATTCATGTATAAGTATAAAGGTGCCCTGATGCTCTAATA	TGCAGAACTGGACAAGTAAATGGCAAGGCCATTCATGTATAAGTATAAAGGTGCCCTGATGCTCTAATA	scaffold04305	15628	1	4.73568e-29	Chromosome09	22858891	1	5.18104e-29	27:G>T	27	0.978723	0.913043	0.402174	0.597826	0.086957	0.315217	0.15879	0.48086	0.319825	15.8598	8.70213	1	0	0	2	0	2	0	0	0	2	0	0	0	0	2	2	0	0	2	0	2	2	2	0	1	2
15485759|F|0-18:A>G-18:A>G	TGCAGAACTGTCGTAGGAAAAAGATCCCTTTGGCTTCTGTGGTTTGAGTTTGATTTTGAATATTACAGA	TGCAGAACTGTCGTAGGAAAAAGATCCCTTTGGCTTCTGTGGTTTGAGTTTGATTTTGAATATTACAGA	scaffold09426	15828	1	1.71535e-23	Chromosome09	9987949	1	1.87666e-23	18:A>G	18	1	1	0.085106	0.914894	0	0.085106	0	0.155727	0.077863	27.2119	12.2	1	0	0	0	0	0	0	0	0	2	0	0	0	0	0	0	0	0	0	0	0	0	0	0	2	0
7111453|F|0-67:A>G-67:A>G	TGCAGAACTTATGCAGTCATAAGCTACATTAGATTCTATACAATGAATCAGGCAGAAATATCAGCATAT	TGCAGAACTTATGCAGTCATAAGCTACATTAGATTCTATACAATGAATCAGGCAGAAATATCAGCATAT	scaffold03802	800367	1	6.12599e-28	Chromosome08	29399374	1	6.7021e-28	67:A>G	67	1	0.840426	0.851064	0.148936	0.159574	0.691489	0.268221	0.253508	0.260865	16.0612	17.39	1	2	0	1	2	2	2	1	2	2	2	0	1	2	2	2	2	2	2	2	2	1	1	0	0	2
7110650|F|0-24:A>G-24:A>G	TGCAGAACTTCAGATGATTTTCTTATAAGATTTCTTGTTATTTGAAAGTCTTTCTTGTGATGAGTTTTG	TGCAGAACTTCAGATGATTTTCTTATAAGATTTCTTGTTATTTGAAAGTCTTTCTTGTGATGAGTTTTG	scaffold08655	263581	1	4.73568e-29	Chromosome13	12343042	1	5.18104e-29	24:A>G	24	0.946809	1	0.033708	0.966292	0	0.033708	0	0.065143	0.032572	6.95455	8.6	1	0	0	0	0	0	0	0	0	2	0	-	0	0	0	0	0	-	0	0	0	0	-	0	2	0
20471151|F|0-20:T>A-20:T>A	TGCAGAACTTCATTCCAGTATATTAGCTTAGGTATCTCACCACTGAGTTTATTCTGTGCTAGATCTCTG	TGCAGAACTTCATTCCAGTATATTAGCTTAGGTATCTCACCACTGAGTTTATTCTGTGCTAGATCTCTG	scaffold04056	174585	1	1.0251e-25	Chromosome03	4822638	1	1.1215e-25	20:T>A	20	1	0.904255	0.638298	0.361702	0.095745	0.542553	0.173155	0.461747	0.317451	6.16038	4.84211	1	0	2	0	2	0	2	0	2	1	2	2	0	2	0	1	2	2	2	1	0	2	0	2	2	2
7111455|F|0-60:A>C-60:A>C	TGCAGAACTTCGAATATATCCAACCTTATCAGTTCTATTTTGCATGGGAATGCATTCAGTATCGTAGCG	TGCAGAACTTCGAATATATCCAACCTTATCAGTTCTATTTTGCATGGGAATGCATTCAGTATCGTAGCG	scaffold12088	25857	1	2.2033e-27	Chromosome03	11775922	1	2.4105e-27	60:A>C	60	1	0.989362	0.276596	0.723404	0.010638	0.265957	0.02105	0.400181	0.210616	16.4741	10.625	1	0	0	2	0	0	0	0	0	1	0	0	0	0	2	0	0	0	2	0	0	0	2	2	0	0
13855366|F|0-14:C>A-14:C>A	TGCAGAACTTGAAACTATTGTCAGTGGGCCTGAAGAAGAAGAGTTGATAGTACAAGGTGTTAGATTTGC	TGCAGAACTTGAAACTATTGTCAGTGGGCCTGAAGAAGAAGAGTTGATAGTACAAGGTGTTAGATTTGC	scaffold06804	16339	1	4.73568e-29	Chromosome16	4321213	1	5.18104e-29	14:C>A	14	1	0.734043	0.787234	0.212766	0.265957	0.521277	0.390448	0.334993	0.362721	22.6556	17.9222	1	2	1	2	2	2	2	2	2	0	2	2	0	1	0	0	2	0	0	2	2	0	2	0	1	1
7111458|F|0-16:T>C-16:T>C	TGCAGAACTTGAAGAGTTGGCTCAAGAATACCGGGCACTGTTGATAGAGAATATAGTTGAGTTGGATGA	TGCAGAACTTGAAGAGTTGGCTCAAGAATACCGGGCACTGTTGATAGAGAATATAGTTGAGTTGGATGA	scaffold07035	788210	2	4.73568e-29	Chromosome02	2709049	2	5.18104e-29	16:T>C	16	1	0.989362	0.148936	0.851064	0.010638	0.138298	0.02105	0.253508	0.137279	5.19658	2.82353	1	2	2	0	0	0	0	0	0	0	0	2	0	2	0	0	0	0	0	0	0	0	0	0	0	0
20493021|F|0-54:T>C-54:T>C	TGCAGAACTTGAGACTCAAGATTTTCCAGTTGCCTAGACAGTGTGGAGTCCTTTTATCTTTTGGTTTTC	TGCAGAACTTGAGACTCAAGATTTTCCAGTTGCCTAGACAGTGTGGAGTCCTTTTATCTTTTGGTTTTC	scaffold11581	1096498	1	4.73568e-29	Chromosome01	21295653	1	5.18104e-29	54:T>C	54	1	0.893617	0.382979	0.617021	0.106383	0.276596	0.190131	0.472612	0.331372	12.7573	9.97826	1	2	0	0	1	0	0	2	0	2	0	2	0	0	2	1	0	0	1	0	0	1	0	0	1	2
13860781|F|0-66:A>G-66:A>G	TGCAGAACTTGAGCTGCTAAATAACCTTGATATTTGGAATTTCCTCCACTTCTTTTCTGGAAATGGATT	TGCAGAACTTGAGCTGCTAAATAACCTTGATATTTGGAATTTCCTCCACTTCTTTTCTGGAAATGGATT	scaffold12654	84376	1	4.73568e-29	Chromosome04	18838508	1	5.18104e-29	66:A>G	66	1	1	0.191489	0.808511	0	0.191489	0	0.309642	0.154821	24.1525	12.7391	1	0	0	0	0	0	0	2	0	2	0	0	0	0	2	0	0	0	0	0	0	2	0	0	2	0
7111469|F|0-17:G>T-17:G>T	TGCAGAACTTTCCTCCCGTACATTTTCAGTGTCAGGAACTTGCTGTAATTGTTGCTCTGAAAAACCATA	TGCAGAACTTTCCTCCCGTACATTTTCAGTGTCAGGAACTTGCTGTAATTGTTGCTCTGAAAAACCATA	scaffold10563	1240386	1	4.73568e-29	Chromosome03	25321427	1	5.18104e-29	17:G>T	17	1	1	0.106383	0.893617	0	0.106383	0	0.190131	0.095066	8.47458	3.16667	1	2	0	0	0	0	0	0	0	0	0	0	0	2	0	0	0	0	0	0	0	0	0	0	0	0
7110862|F|0-67:T>C-67:T>C	TGCAGAAGAAAAAAGTCAAGCCTAACGGAGGTGCAAATGGAGAGGGAGCTTTCATTATTGTGGAACCTT	TGCAGAAGAAAAAAGTCAAGCCTAACGGAGGTGCAAATGGAGAGGGAGCTTTCATTATTGTGGAACCTT	scaffold07012	800547	1	6.12599e-28	Chromosome18	1407904	1	6.7021e-28	67:T>C	67	1	0.840426	0.659574	0.340426	0.159574	0.5	0.268221	0.449072	0.358646	15.84	12.7532	1	0	1	0	1	1	0	2	0	2	0	0	2	0	2	2	0	0	2	2	2	2	2	2	2	0
7106987|F|0-31:A>G-31:A>G	TGCAGAAGAAAAAATAAAGGCTATAAGCAATAGAAATAGTGAAAATTGTTCACAATTCCATGCACCTAA	TGCAGAAGAAAAAATAAAGGCTATAAGCAATAGAAATAGTGAAAATTGTTCACAATTCCATGCACCTAA	scaffold06868	61073	1	4.73568e-29	Chromosome13	22622900	1	5.18104e-29	31:A>G	31	1	1	0.223404	0.776596	0	0.223404	0	0.34699	0.173495	16.9746	9.40741	1	2	2	0	0	0	0	0	0	0	0	2	0	0	2	0	0	2	0	0	0	0	2	0	0	2
20493027|F|0-30:A>G-30:A>G	TGCAGAAGAAAAACAACTCCAATCAAGCGGACTTTCACTTTCACGCATTATTCTCTGATAATAAACTTC	TGCAGAAGAAAAACAACTCCAATCAAGCGGACTTTCACTTTCACGCATTATTCTCTGATAATAAACTTC	scaffold10780	174074	1	4.73568e-29	Chromosome12	9729967	1	5.18104e-29	30:A>G	30	0.946809	0.662921	0.426966	0.573034	0.337079	0.089888	0.446913	0.489332	0.468123	4.52113	3.06383	1	0	0	0	0	2	1	0	1	0	1	0	-	2	0	0	1	0	0	1	0	0	2	1	0	0
20501876|F|0-51:T>C-51:T>C	TGCAGAAGAAAACAAAATCAAGATTAGTCAATCCTGATCCTTCCACTCCACTGCACAATCGTGCAAATA	TGCAGAAGAAAACAAAATCAAGATTAGTCAATCCTGATCCTTCCACTCCACTGCACAATCGTGCAAATA	scaffold12525	726166	1	4.73568e-29	Chromosome11	2429215	1	5.18104e-29	51:T>C	51	1	1	0.074468	0.925532	0	0.074468	0	0.137845	0.068923	32.0763	20.6667	1	2	0	0	0	0	0	0	0	0	0	0	0	0	0	0	0	0	0	0	0	0	2	0	0	0
7111474|F|0-33:T>C-33:T>C	TGCAGAAGAAAATGGTATGCAGCATTGTTTTTGTACCTCATGTTATAGGGATTCTCGAGGTGGGAGTAT	TGCAGAAGAAAATGGTATGCAGCATTGTTTTTGTACCTCATGTTATAGGGATTCTCGAGGTGGGAGTAT	scaffold06871	730022	1	4.73568e-29	Chromosome01	22922953	1	5.18104e-29	33:T>C	33	1	0.989362	0.053191	0.946809	0.010638	0.042553	0.02105	0.100724	0.060887	9.52991	4.16667	1	0	2	0	0	0	0	0	0	0	0	0	0	0	0	0	0	0	0	0	0	0	0	0	0	1
20484741|F|0-57:G>A-57:G>A	TGCAGAAGAAACCTCAGGTTCTTCTCAGGTTTCCAACCCTGGATAAATAGGAAACACGTGCATACACTT	TGCAGAAGAAACCTCAGGTTCTTCTCAGGTTTCCAACCCTGGATAAATAGGAAACACGTGCATACACTT	scaffold11378	178002	1	4.73568e-29	Chromosome13	4754309	1	5.18104e-29	57:G>A	57	1	1	0.06383	0.93617	0	0.06383	0	0.119511	0.059756	14.7881	5.88889	1	0	0	0	2	0	0	0	0	2	0	0	0	0	0	0	0	0	0	0	0	0	0	0	2	0
7122601|F|0-66:C>T-66:C>T	TGCAGAAGAAATTCACTTGCCCCTGCATCCAGCTGAAACTAAGCACAAGCATCCTTTCTTGAATGTCGC	TGCAGAAGAAATTCACTTGCCCCTGCATCCAGCTGAAACTAAGCACAAGCATCCTTTCTTGAATGTCGC	scaffold07543	65191	1	2.2033e-27	Chromosome13	1376948	1	2.4105e-27	66:C>T	66	1	0.62766	0.680851	0.319149	0.37234	0.308511	0.467406	0.434586	0.450996	32.5	32.4691	1	0	0	0	1	2	1	0	1	2	1	2	2	2	0	2	1	1	0	1	1	2	0	2	1	2
13855376|F|0-18:G>A-18:G>A	TGCAGAAGAACATATAAAGCATTACGTTACTTGGAAAAACCATTGCCAAAAATTGTACTAATCTTACAA	TGCAGAAGAACATATAAAGCATTACGTTACTTGGAAAAACCATTGCCAAAAATTGTACTAATCTTACAA	scaffold09231	45610	1	4.73568e-29	Chromosome04	22482830	1	5.18104e-29	18:G>A	18	1	1	0.212766	0.787234	0	0.212766	0	0.334993	0.167497	15.8983	9.11538	1	0	0	0	0	0	0	2	0	2	0	0	0	0	2	0	0	0	0	0	0	2	2	0	2	0
13855378|F|0-42:C>A-42:C>A	TGCAGAAGAACCCTTCAAGCTCCCTCCTTTGTACTTCTGCTACTACTAGTTTTCTCTCTTTGTCTTGTA	TGCAGAAGAACCCTTCAAGCTCCCTCCTTTGTACTTCTGCTACTACTAGTTTTCTCTCTTTGTCTTGTA	scaffold07313	84632	1	4.73568e-29	Chromosome02	16036273	1	5.18104e-29	42:C>A	42	1	1	0.095745	0.904255	0	0.095745	0	0.173155	0.086578	25.161	12.3333	1	0	0	0	0	0	0	0	0	0	0	0	0	0	0	0	0	0	0	0	0	0	0	0	0	0
7106991|F|0-40:A>C-40:A>C	TGCAGAAGAACCTATTCCAACTTTTTCCTGCAATATGCATATTCAAACATGTAATTTCACATAAACAGA	TGCAGAAGAACCTATTCCAACTTTTTCCTGCAATATGCATATTCAAACATGTAATTTCACATAAACAGA	scaffold03741	695877	1	4.73568e-29	Chromosome15	6472761	1	5.18104e-29	40:A>C	40	1	0.978723	0.351064	0.648936	0.021277	0.329787	0.041648	0.455636	0.248642	21.0696	14.641	1	0	0	0	0	2	0	2	0	1	0	0	0	0	2	0	0	0	2	0	0	0	0	0	2	0
13858592|F|0-48:A>G-48:A>G	TGCAGAAGAACGAGCTGGGGCTGATGCCACAATGTCTACCACTTCTTTATTTGAGAGAACATCCCAAAT	TGCAGAAGAACGAGCTGGGGCTGATGCCACAATGTCTACCACTTCTTTATTTGAGAGAACATCCCAAAT	scaffold06711	217305	2	2.2033e-27	Chromosome12	541414	2	2.4105e-27	48:A>G	48	1	1	0.106383	0.893617	0	0.106383	0	0.190131	0.095066	12.0593	8.72727	1	0	0	0	0	0	0	0	0	0	0	0	2	0	0	0	0	0	0	0	0	0	0	0	0	0
7106992|F|0-20:T>G-20:T>G	TGCAGAAGAACTATAATAGCTTAGGAGGAAGTGTAGCTAATACAAAATTATTGAAACGTGAACCTTACA	TGCAGAAGAACTATAATAGCTTAGGAGGAAGTGTAGCTAATACAAAATTATTGAAACGTGAACCTTACA	scaffold04890	91715	1	2.85015e-26	Chromosome17	19249018	1	3.11819e-26	20:T>G	20	1	0.914894	0.542553	0.457447	0.085106	0.457447	0.155727	0.496378	0.326053	12.9623	9.41935	1	0	1	0	0	0	2	2	2	0	2	0	1	2	0	0	2	0	0	0	2	1	0	1	0	2
7146827|F|0-28:T>C-28:T>C	TGCAGAAGAAGAAGCTCCTCCAGAAGTCTTGATCATGAACTTGTTGATCAATCTCGAACGAATTTCCTC	TGCAGAAGAAGAAGCTCCTCCAGAAGTCTTGATCATGAACTTGTTGATCAATCTCGAACGAATTTCCTC	scaffold03803	156654	1	4.73568e-29	Chromosome05	10319073	1	5.18104e-29	28:T>C	28	1	1	0.053191	0.946809	0	0.053191	0	0.100724	0.050362	6.77119	3.33333	1	2	0	0	0	0	0	0	0	0	0	0	0	0	0	0	0	0	0	0	0	0	0	0	0	0
7106994|F|0-40:C>G-40:C>G	TGCAGAAGAAGAATTTGATTTCCATGAAATTCACGTTATACTAAAGCATAAACATGATGAACAAAGTGA	TGCAGAAGAAGAATTTGATTTCCATGAAATTCACGTTATACTAAAGCATAAACATGATGAACAAAGTGA	scaffold02630	24591	1	4.73568e-29	Chromosome13	9413416	1	5.18104e-29	40:C>G	40	1	0.989362	0.361702	0.638298	0.010638	0.351064	0.02105	0.461747	0.241399	9.77778	5.51163	1	0	0	0	2	0	2	0	2	0	2	2	0	2	0	0	2	2	0	0	2	0	0	0	0	0
7111486|F|0-35:A>G-35:A>G	TGCAGAAGAAGAGAAAGGCTGCATGAAGAGGGATTAGATTATAACAATTTTGAACTTTATATTCATATT	TGCAGAAGAAGAGAAAGGCTGCATGAAGAGGGATTAGATTATAACAATTTTGAACTTTATATTCATATT	scaffold03834	374122	1	2.2033e-27	Chromosome05	8636241	1	2.4105e-27	35:A>G	35	1	0.861702	0.765957	0.234043	0.138298	0.62766	0.238343	0.358533	0.298438	11.3824	13.6522	1	1	0	2	2	2	2	2	2	1	2	0	2	2	2	0	2	1	2	2	0	2	2	2	2	1
7111488|F|0-66:C>T-66:C>T	TGCAGAAGAAGAGCTCGGGAGAAGAGAAACCAGCGTCAGCGAAGATGCATTAGATATTCCCAGTACCTT	TGCAGAAGAAGAGCTCGGGAGAAGAGAAACCAGCGTCAGCGAAGATGCATTAGATATTCCCAGTACCTT	scaffold09692	339894	1	4.73568e-29	Chromosome08	5662307	1	5.18104e-29	66:C>T	66	1	1	0.031915	0.968085	0	0.031915	0	0.061793	0.030896	10.7288	6.25	1	0	0	0	0	0	0	0	0	0	0	0	0	0	0	0	0	0	0	2	0	0	0	0	0	0
7111489|F|0-55:T>A-55:T>A	TGCAGAAGAAGAGGCATCCCACATCAAACTATGAAAATGATGGCAGTAAAACATATATTTGCCAGTTGA	TGCAGAAGAAGAGGCATCCCACATCAAACTATGAAAATGATGGCAGTAAAACATATATTTGCCAGTTGA	scaffold07571	785387	1	2.2033e-27	Chromosome01	31263593	1	2.4105e-27	55:T>A	55	1	0.925532	0.478723	0.521277	0.074468	0.404255	0.137845	0.499095	0.31847	12.037	9.35593	1	0	0	0	2	0	2	0	2	1	2	2	0	0	0	2	2	2	0	1	2	2	0	1	2	2
7111490|F|0-53:C>A-53:C>A	TGCAGAAGAAGATAACTTCCCTTCTAGACAACGTGGCTGATAGCGTCAAATGACTGTTGTGTTGCTTCG	TGCAGAAGAAGATAACTTCCCTTCTAGACAACGTGGCTGATAGCGTCAAATGACTGTTGTGTTGCTTCG	scaffold03614	507535	1	4.73568e-29	Chromosome09	24556891	1	5.18104e-29	53:C>A	53	1	0.978723	0.276596	0.723404	0.021277	0.255319	0.041648	0.400181	0.220914	8.77586	4.78125	1	0	2	0	2	0	0	0	0	0	0	2	0	0	2	2	0	0	0	0	0	2	0	0	0	2
7111491|F|0-40:G>A-40:G>A	TGCAGAAGAAGATAATATGACAAACCAGTGATAAAGAAACGTAAAAAAGCAGAAATAATAGTTGAAATT	TGCAGAAGAAGATAATATGACAAACCAGTGATAAAGAAACGTAAAAAAGCAGAAATAATAGTTGAAATT	scaffold09305	69184	1	2.2033e-27	Chromosome11	6848147	1	2.4105e-27	40:G>A	40	0.882979	1	0.13253	0.86747	0	0.13253	0	0.229932	0.114966	13.9612	9.53333	1	2	0	0	0	-	0	0	0	0	0	-	0	-	0	0	0	0	2	2	-	0	0	2	0	-
20471173|F|0-41:C>T-41:C>T	TGCAGAAGAAGCTATTCCATTCATGTTGATCTTATCTTATTCATTATTATGCATATTTATCTCCATTTA	TGCAGAAGAAGCTATTCCATTCATGTTGATCTTATCTTATTCATTATTATGCATATTTATCTCCATTTA	scaffold01551	1340157	1	4.73568e-29	Chromosome15	2378771	1	5.18104e-29	41:C>T	41	0.989362	0.731183	0.387097	0.612903	0.268817	0.11828	0.393109	0.474506	0.433807	9.16092	3.86047	1	0	0	0	0	0	1	0	1	0	1	0	2	1	0	0	1	2	0	0	0	0	0	0	0	0
7119794|F|0-52:C>A-52:C>A	TGCAGAAGAAGCTGTGAACCTCTGATCTGCAAGCAATGGTTGTCTCAATTGCCAAACCAGAACAATGGA	TGCAGAAGAAGCTGTGAACCTCTGATCTGCAAGCAATGGTTGTCTCAATTGCCAAACCAGAACAATGGA	scaffold09150	551435	1	4.73568e-29	Chromosome13	13513912	1	5.18104e-29	52:C>A	52	0.93617	0.579545	0.715909	0.284091	0.420455	0.295455	0.487345	0.406767	0.447056	9.07576	9.75	1	0	-	2	0	2	1	2	1	2	1	2	0	1	0	2	1	1	2	0	1	2	0	1	2	0
20471175|F|0-31:T>C-31:T>C	TGCAGAAGAAGGTAAGCAACAGCTATCCTTATATATTTTTGTTACAAATAATGTAGAGATAGTTTGATT	TGCAGAAGAAGGTAAGCAACAGCTATCCTTATATATTTTTGTTACAAATAATGTAGAGATAGTTTGATT	scaffold08359	1237815	1	4.73568e-29	Chromosome14	7124365	1	5.18104e-29	31:T>C	31	1	1	0.095745	0.904255	0	0.095745	0	0.173155	0.086578	13.7203	10.1667	1	2	0	0	0	2	0	0	0	0	0	0	0	0	0	0	0	0	0	2	0	0	0	0	0	0
7106996|F|0-37:G>A-37:G>A	TGCAGAAGAAGTAGAAAAGTGTGATTCGGCTGAAAAGGAGAGGTTTCCATACGACCAAACAGAAATGCT	TGCAGAAGAAGTAGAAAAGTGTGATTCGGCTGAAAAGGAGAGGTTTCCATACGACCAAACAGAAATGCT	scaffold03404	38796	1	4.73568e-29	Chromosome01	2999782	1	5.18104e-29	37:G>A	37	1	0.925532	0.670213	0.329787	0.074468	0.595745	0.137845	0.442055	0.28995	15.4815	13.9875	1	0	1	2	2	0	2	0	2	1	2	0	0	2	0	2	2	2	1	2	2	0	2	2	2	0
20501883|F|0-29:T>G-29:T>G	TGCAGAAGAATAATCCCGAGGAAATCAGATAGAGGGAGAAGACAAGCAATGAGTAAGGATTATGTCCTG	TGCAGAAGAATAATCCCGAGGAAATCAGATAGAGGGAGAAGACAAGCAATGAGTAAGGATTATGTCCTG	scaffold08014	36597	1	4.73568e-29	Chromosome12	14591311	1	5.18104e-29	29:T>G	29	1	1	0.138298	0.861702	0	0.138298	0	0.238343	0.119172	15.4746	6.46667	1	0	0	0	0	0	0	0	0	0	0	0	0	0	0	0	0	0	0	0	0	0	2	0	2	0
7111497|F|0-67:A>G-67:A>G	TGCAGAAGAATATAGTAAGAGCAATGAAGCAAGCAAGGCCACATATCAGGAACAGTCCCCAGAAGCTAC	TGCAGAAGAATATAGTAAGAGCAATGAAGCAAGCAAGGCCACATATCAGGAACAGTCCCCAGAAGCTAC	scaffold06906	279650	1	6.12599e-28	Chromosome12	7761568	1	6.7021e-28	67:A>G	67	0.861702	0.91358	0.209877	0.790123	0.08642	0.123457	0.157903	0.331657	0.24478	6.56842	4.55	1	0	0	0	0	0	0	1	0	2	0	0	-	0	0	0	0	0	2	0	0	0	-	0	0	0
7146840|F|0-29:C>T-29:C>T	TGCAGAAGAATCTAAAGCTTCCAGTTCGTCGTTACCAGAGCAATTTAGGGCTCAGGTGGAAGGGACAGA	TGCAGAAGAATCTAAAGCTTCCAGTTCGTCGTTACCAGAGCAATTTAGGGCTCAGGTGGAAGGGACAGA	scaffold05335	360198	1	4.73568e-29	Chromosome17	25301492	1	5.18104e-29	29:C>T	29	1	1	0.074468	0.925532	0	0.074468	0	0.137845	0.068923	15.0593	7.125	1	0	0	0	0	0	0	0	0	0	0	0	0	0	0	0	0	0	0	0	0	0	2	0	0	0
7106999|F|0-64:G>C-64:G>C	TGCAGAAGAATGAGGAAGCTGCATTGTTTGAAGCTCCTTGGTCTGAGTTGCCATTGTTGAGGTGGAAAT	TGCAGAAGAATGAGGAAGCTGCATTGTTTGAAGCTCCTTGGTCTGAGTTGCCATTGTTGAGGTGGAAAT	scaffold00987	44783	1	4.73568e-29	Chromosome02	27750932	1	5.18104e-29	64:G>C	64	1	1	0.06383	0.93617	0	0.06383	0	0.119511	0.059756	23.4746	11	1	0	2	0	0	0	0	0	0	0	0	0	0	0	0	0	0	0	2	0	0	0	0	0	0	2
13858521|F|0-7:G>A-7:G>A	TGCAGAAGAATGTTGGTTGGAATATTTATTTCACACAAGTTCTTTGGAGTGGGAGTCATTACAGATCGG	TGCAGAAGAATGTTGGTTGGAATATTTATTTCACACAAGTTCTTTGGAGTGGGAGTCATTAC	scaffold09657	81056	1	3.20682e-20	Chromosome05	21990654	1	3.50833e-20	7:G>A	7	1	0.861702	0.574468	0.425532	0.138298	0.43617	0.238343	0.488909	0.363626	15.4242	13.5672	1	1	0	0	0	1	2	0	2	2	2	1	2	0	1	1	2	0	0	0	1	2	0	0	0	0
7111502|F|0-61:G>A-61:G>A	TGCAGAAGAATTCATAAACATTCCAGATTTTTTGAGTCAATGTTTCATACAATCTCTACATGAGTTGAA	TGCAGAAGAATTCATAAACATTCCAGATTTTTTGAGTCAATGTTTCATACAATCTCTACATGAGTTGAA	scaffold08100	481604	1	2.2033e-27	Chromosome09	1595235	1	2.4105e-27	61:G>A	61	1	0.914894	0.191489	0.808511	0.085106	0.106383	0.155727	0.309642	0.232684	17.4444	10.7391	1	2	0	0	2	0	0	0	0	0	0	0	0	0	0	2	0	1	0	0	1	0	0	0	0	0
7146843|F|0-23:G>C-23:G>C	TGCAGAAGAATTGGACTGTATATGAGCTAGTCAGCTACCTAGATACTAGGTGTACACTAAGTGATCATC	TGCAGAAGAATTGGACTGTATATGAGCTAGTCAGCTACCTAGATACTAGGTGTACACTAAGTGATCATC	scaffold03750	213038	1	4.73568e-29	Chromosome11	24844022	1	5.18104e-29	23:G>C	23	0.989362	1	0.096774	0.903226	0	0.096774	0	0.174818	0.087409	8.31624	12.8182	1	0	0	0	0	0	0	0	0	0	0	0	0	0	0	0	0	0	0	0	0	2	2	0	0	0
7111503|F|0-19:T>G-19:T>G	TGCAGAAGAATTGGCAAAATGTGGTAATTTCTTTGACATGCTTTATGTTCAGCATTTGATCATTCTCTA	TGCAGAAGAATTGGCAAAATGTGGTAATTTCTTTGACATGCTTTATGTTCAGCATTTGATCATTCTCTA	scaffold08974	144459	1	4.73568e-29	Chromosome12	8394488	1	5.18104e-29	19:T>G	19	1	1	0.446809	0.553191	0	0.446809	0	0.494341	0.247171	25.0932	22.7308	1	0	0	0	0	0	2	0	2	0	2	2	0	2	2	0	2	2	0	2	2	0	0	0	0	0
7111505|F|0-24:T>A-24:T>A	TGCAGAAGACAAGCCAAAAAATGGTGGTAATTATGAACAAATTTACGTCTAGAAACAAGGACATGATCG	TGCAGAAGACAAGCCAAAAAATGGTGGTAATTATGAACAAATTTACGTCTAGAAACAAGGACATGATCG	scaffold08122	116669	1	2.2033e-27	Chromosome11	13896718	1	2.4105e-27	24:T>A	24	1	0.989362	0.531915	0.468085	0.010638	0.521277	0.02105	0.497963	0.259507	27.8103	19.05	1	2	0	0	0	0	2	0	2	0	2	2	0	2	0	0	2	2	2	0	0	0	0	1	0	2
7109757|F|0-60:C>G-60:C>G	TGCAGAAGACAGACCGGAGGTACTTGATAGTAATTTCTTTTACTTTCTCTTTCTGGCCTCCTAGTTCTT	TGCAGAAGACAGACCGGAGGTACTTGATAGTAATTTCTTTTACTTTCTCTTTCTGGCCTCCTAGTTCTT	scaffold08265	400692	1	4.73568e-29	Chromosome12	29260383	1	5.18104e-29	60:C>G	60	1	1	0.223404	0.776596	0	0.223404	0	0.34699	0.173495	28.8729	16.5769	1	0	0	2	2	0	0	2	0	2	0	0	2	0	0	0	0	0	0	0	0	0	0	0	0	0
7107000|F|0-33:G>C-33:G>C	TGCAGAAGACATTTGTTTCAAAAATCCCCTGCTGTCTTATTTCTTCCGCCTTGGTATTTTCTTCAAATG	TGCAGAAGACATTTGTTTCAAAAATCCCCTGCTGTCTTATTTCTTCCGCCTTGGTATTTTCTTCAAATG	scaffold07520	2948250	1	4.73568e-29	Chromosome01	26568177	1	5.18104e-29	33:G>C	33	1	1	0.234043	0.765957	0	0.234043	0	0.358533	0.179267	23.4068	12.4516	1	0	2	2	0	0	0	2	0	0	0	0	2	0	2	2	0	0	2	0	0	2	2	0	0	0
20498456|F|0-22:T>C-22:T>C	TGCAGAAGACCCAGGAATCAAATGCTGAGCTCATACTTGCTGTCAAAGACCTAGAAGAAATGTTGGAGT	TGCAGAAGACCCAGGAATCAAATGCTGAGCTCATACTTGCTGTCAAAGACCTAGAAGAAATGTTGGAGT	scaffold07035	46678	2	4.73568e-29	Chromosome02	1909718	2	5.18104e-29	22:T>C	22	1	0.989362	0.351064	0.648936	0.010638	0.340426	0.02105	0.455636	0.238343	8.56897	5.04762	1	0	0	2	0	2	0	0	0	0	0	0	2	0	2	2	0	2	0	2	2	0	1	0	0	2
7139076|F|0-24:G>C-24:G>C	TGCAGAAGACCTATTAGGTATGAAGCCACTTACAGCACACATAAGAAGACGAGACTACCTTCATTCATT	TGCAGAAGACCTATTAGGTATGAAGCCACTTACAGCACACATAAGAAGACGAGACTACCTTCATTCATT	scaffold04182	57844	1	4.73568e-29	Chromosome11	25859937	1	5.18104e-29	24:G>C	24	0.957447	0.911111	0.566667	0.433333	0.088889	0.477778	0.161975	0.491111	0.326543	16.4706	12.9375	1	1	0	2	0	0	2	0	2	-	2	2	2	1	0	2	2	0	0	1	2	0	0	2	0	0
7111509|F|0-19:G>A-19:G>A	TGCAGAAGACCTGCAAATGGCAATTTTGAATGTTCATTACAGATTGTAAGGATCAGGAATTTTTCATTT	TGCAGAAGACCTGCAAATGGCAATTTTGAATGTTCATTACAGATTGTAAGGATCAGGAATTTTTCATTT	scaffold11581	118859	1	4.73568e-29	Chromosome01	20272386	1	5.18104e-29	19:G>A	19	1	1	0.12766	0.87234	0	0.12766	0	0.222725	0.111363	21.5424	11.9333	1	0	0	0	0	0	0	2	0	0	0	0	0	0	0	0	0	0	2	0	0	0	0	2	0	0
7111510|F|0-7:G>T-7:G>T	TGCAGAAGACTACTTCACTATCAGAACCATGATACTGTAATGGTCATATGCAATTGCAATTACAGATCG	TGCAGAAGACTACTTCACTATCAGAACCATGATACTGTAATGGTCATATGCAATTGCAATTAC	scaffold10305	690440	1	3.26801e-25	Chromosome08	27354945	1	3.48359e-25	7:G>T	7	1	1	0.074468	0.925532	0	0.074468	0	0.137845	0.068923	20.9746	10.25	1	0	0	0	0	0	0	0	0	0	0	0	0	0	0	0	0	0	0	0	0	2	0	0	0	2
7146858|F|0-63:T>C-63:T>C	TGCAGAAGAGAGAGCTTCAACACTAGAAGATGAAGAATCGGTTCCTTCAGCTCTAATCAAGTTTAGGCC	TGCAGAAGAGAGAGCTTCAACACTAGAAGATGAAGAATCGGTTCCTTCAGCTCTAATCAAGTTTAGGCC	scaffold11322	18641	1	4.73568e-29	Chromosome17	22265750	1	5.18104e-29	63:T>C	63	0.989362	0.978495	0.032258	0.967742	0.021505	0.010753	0.042086	0.062435	0.05226	10.1491	7.25	1	0	0	0	0	0	0	0	0	0	0	0	0	0	0	0	0	0	0	0	0	0	1	0	0	0
7110864|F|0-28:C>T-28:C>T	TGCAGAAGAGCAAATGATATTGAGAAAACTGTCTTCATGAGATTATATGATGATGTTCTTTGGGTTTAG	TGCAGAAGAGCAAATGATATTGAGAAAACTGTCTTCATGAGATTATATGATGATGTTCTTTGGGTTTAG	scaffold02196	52054	1	4.73568e-29	Chromosome04	25127533	1	5.18104e-29	28:C>T	28	0.989362	0.956989	0.129032	0.870968	0.043011	0.086022	0.082322	0.224766	0.153544	22.7611	14.2143	1	0	0	0	0	0	0	0	0	0	0	0	0	0	0	0	0	2	0	0	0	0	2	0	0	0
7146861|F|0-13:A>G-13:A>G	TGCAGAAGAGCATAGGATGCCCATAAAAGAGTCAGCAAGGAAAAACAAAAGAAACAGAAGGTGAAATTT	TGCAGAAGAGCATAGGATGCCCATAAAAGAGTCAGCAAGGAAAAACAAAAGAAACAGAAGGTGAAATTT	scaffold08593	117577	1	4.73568e-29	Chromosome07	9636949	1	5.18104e-29	13:A>G	13	0.946809	0.674157	0.47191	0.52809	0.325843	0.146067	0.439338	0.498422	0.46888	10.3421	7.09259	1	1	0	0	0	0	1	0	1	2	1	1	0	1	0	0	1	2	0	1	2	0	0	2	0	0
20493055|F|0-65:G>T-65:G>T	TGCAGAAGAGCTAAAAGTCTCAAGCTTTTACCATACAATAGAATAAAATAGTAATTCGTGATGACGTTG	TGCAGAAGAGCTAAAAGTCTCAAGCTTTTACCATACAATAGAATAAAATAGTAATTCGTGATGACGTTG	scaffold06631	748805	1	2.2033e-27	Chromosome06	836517	1	2.4105e-27	65:G>T	65	1	0.989362	0.042553	0.957447	0.010638	0.031915	0.02105	0.081485	0.051268	23.5897	14	1	0	0	0	0	0	0	0	0	0	0	0	0	0	0	0	0	0	0	0	0	0	0	0	0	0
7107005|F|0-7:G>T-7:G>T	TGCAGAAGAGGAAGTGGAGCATCAGACTCGGAATGGTCACAGACAGACGAAAAAGGAGAAAAGGTGACA	TGCAGAAGAGGAAGTGGAGCATCAGACTCGGAATGGTCACAGACAGACGAAAAAGGAGAAAAGGTGACA	scaffold07571	673971	1	4.73568e-29	Chromosome01	31370424	1	5.18104e-29	7:G>T	7	1	1	0.319149	0.680851	0	0.319149	0	0.434586	0.217293	12.5339	7.4878	1	0	2	2	2	2	0	2	0	0	0	0	2	0	2	0	0	0	2	0	0	2	2	0	2	0
7111518|F|0-50:T>G-50:T>G	TGCAGAAGAGGTTACAGAGGTTATGAAGGATGAAAGCAACGCTTTACCTGTCATAGATGCTACTATTCA	TGCAGAAGAGGTTACAGAGGTTATGAAGGATGAAAGCAACGCTTTACCTGTCATAGATGCTACTATTCA	scaffold07238	584229	1	4.73568e-29	Chromosome02	12772483	1	5.18104e-29	50:T>G	50	1	0.882979	0.37234	0.62766	0.117021	0.255319	0.206655	0.467406	0.33703	11.5437	8.78261	1	0	1	2	2	0	0	1	0	2	0	0	2	0	2	1	0	2	2	0	0	1	0	0	0	0
7111519|F|0-57:G>A-57:G>A	TGCAGAAGAGGTTTATGGTGAAGATGTTGAAACATTGGTTATGGATGAAGATGAGCAGCCCCTTGAACA	TGCAGAAGAGGTTTATGGTGAAGATGTTGAAACATTGGTTATGGATGAAGATGAGCAGCCCCTTGAACA	scaffold08686	460014	1	4.73568e-29	Chromosome14	12332156	1	5.18104e-29	57:G>A	57	1	1	0.031915	0.968085	0	0.031915	0	0.061793	0.030896	12.2627	6.66667	1	0	0	0	0	0	0	0	0	0	0	0	0	0	0	0	0	0	0	0	0	0	0	0	0	0
7111520|F|0-44:A>G-44:A>G	TGCAGAAGAGTCATTATGTGCCAATACTAATATTCCATTCACCAACACTAAGGAAGCAGTAGAATATTT	TGCAGAAGAGTCATTATGTGCCAATACTAATATTCCATTCACCAACACTAAGGAAGCAGTAGAATATTT	scaffold03803	105051	1	1.0251e-25	Chromosome05	10369546	1	1.1215e-25	44:A>G	44	1	0.968085	0.638298	0.361702	0.031915	0.606383	0.061793	0.461747	0.26177	20.6228	15.9315	1	0	2	2	0	0	2	2	2	0	2	0	2	2	0	0	2	2	2	2	0	0	1	0	0	2
7149334|F|0-53:T>C-53:T>C	TGCAGAAGAGTGCGAATCAAGTTTACACCAACTGATGATGTTTGTACATGTTCTGGACCCCAAAATTTA	TGCAGAAGAGTGCGAATCAAGTTTACACCAACTGATGATGTTTGTACATGTTCTGGACCCCAAAATTTA	scaffold12265	9324	2	4.73568e-29	Chromosome03	1206231	2	5.18104e-29	53:T>C	53	1	1	0.648936	0.351064	0	0.648936	0	0.455636	0.227818	12.339	6.48684	1	0	2	2	0	0	2	2	2	0	2	2	2	2	2	0	2	2	0	2	0	0	2	2	0	0
7107007|F|0-13:G>A-13:G>A	TGCAGAAGATAGTGGATAAGTTAGTAGCATATTCACTTTTCTAATTTGGCCTATGATCTGCATGATAGT	TGCAGAAGATAGTGGATAAGTTAGTAGCATATTCACTTTTCTAATTTGGCCTATGATCTGCATGATAGT	scaffold03237	48336	1	4.73568e-29	Chromosome18	4057108	1	5.18104e-29	13:G>A	13	1	1	0.053191	0.946809	0	0.053191	0	0.100724	0.050362	17.6102	8	1	0	0	0	2	0	0	0	0	0	0	0	0	0	0	0	0	0	0	0	0	0	0	2	0	0
7111523|F|0-42:G>A-42:G>A	TGCAGAAGATATAGGAAACTGTGAAACTTCAGAGAAAAGAAAGATGGGAAAAGATAAATTTTAGAAAGA	TGCAGAAGATATAGGAAACTGTGAAACTTCAGAGAAAAGAAAGATGGGAAAAGATAAATTTTAGAAAGA	scaffold00325	361870	1	4.73568e-29	Chromosome15	12953013	1	5.18104e-29	42:G>A	42	1	0.978723	0.265957	0.734043	0.021277	0.244681	0.041648	0.390448	0.216048	16.931	10.375	1	0	2	0	0	0	0	2	0	2	0	2	0	0	0	2	0	0	0	0	2	0	2	0	0	0
7146876|F|0-27:C>A-27:C>A	TGCAGAAGATATGACAGTTATTTGCCTCGACTATTTAGAAATTGGGCTGTGGTCGTGTTGTTGGTTGTT	TGCAGAAGATATGACAGTTATTTGCCTCGACTATTTAGAAATTGGGCTGTGGTCGTGTTGTTGGTTGTT	scaffold10963	60185	1	2.2033e-27	Chromosome06	26422700	1	2.4105e-27	27:C>A	27	1	0.978723	0.308511	0.691489	0.021277	0.287234	0.041648	0.426664	0.234156	19.9483	12.697	1	2	0	2	0	2	0	2	0	0	0	0	0	0	0	0	0	0	0	0	0	0	0	0	0	2
7142322|F|0-53:C>T-53:C>T	TGCAGAAGATCAAGAGATCAGCAATGCCCCAAGCTTGAAAAATTGCATTGCTTCCATTTACACCCTGTT	TGCAGAAGATCAAGAGATCAGCAATGCCCCAAGCTTGAAAAATTGCATTGCTTCCATTTACACCCTGTT	scaffold06688	339117	1	4.73568e-29	Chromosome18	7695277	1	5.18104e-29	53:C>T	53	0.989362	0.526882	0.892473	0.107527	0.473118	0.419355	0.498555	0.19193	0.345242	8.98361	11.3786	1	1	2	1	0	1	2	1	2	1	2	1	1	2	1	1	2	0	1	0	2	1	1	2	0	1
7119803|F|0-30:C>T-30:C>T	TGCAGAAGATCAGCAGCACACCCCAGGGTGCGCCTGACTCTGAGAGGCACTAGCTGTTCGCCTATTTTG	TGCAGAAGATCAGCAGCACACCCCAGGGTGCGCCTGACTCTGAGAGGCACTAGCTGTTCGCCTATTTTG	scaffold07683	52206	1	4.73568e-29	Chromosome13	14516740	1	5.18104e-29	30:C>T	30	1	0.978723	0.234043	0.765957	0.021277	0.212766	0.041648	0.358533	0.200091	9.29565	5.89655	1	0	0	0	0	0	0	0	0	2	0	2	2	0	2	0	0	0	0	2	0	0	1	0	2	2
34220223|F|0-36:A>C-36:A>C	TGCAGAAGATCATAATCTTCTAGCAACCTTTGGGACAAGTGTAAATGTAAATGTCCATATATAAAATTT	TGCAGAAGATCATAATCTTCTAGCAACCTTTGGGACAAGTGTAAATGTAAATGTCCATATATAAAATTT	scaffold11834	107560	1	4.73568e-29	Chromosome17	1162191	1	5.18104e-29	36:A>C	36	0.989362	0.989247	0.043011	0.956989	0.010753	0.032258	0.021274	0.082322	0.051798	4.57522	4.25	1	0	0	0	0	0	0	0	0	0	0	0	0	0	0	0	0	0	0	0	0	0	0	0	0	-
7111525|F|0-26:G>A-26:G>A	TGCAGAAGATGATCCGCTTTTCCAAGGGTAAATTGCGTAGCTCTTTGAAGCCTTTCTACAAATATGTGG	TGCAGAAGATGATCCGCTTTTCCAAGGGTAAATTGCGTAGCTCTTTGAAGCCTTTCTACAAATATGTGG	scaffold06278	351489	1	4.73568e-29	Chromosome03	22881613	1	5.18104e-29	26:G>A	26	1	0.968085	0.265957	0.734043	0.031915	0.234043	0.061793	0.390448	0.22612	17.6195	11.4516	1	0	0	0	0	0	0	2	0	2	0	0	2	0	0	1	0	0	0	0	0	1	2	0	0	0
7143108|F|0-18:G>A-18:G>A	TGCAGAAGATGATGATTTGTCATTTTCTCTAATAGGATCCAAATCTAGAGGAGAGAATGTGGATACTAG	TGCAGAAGATGATGATTTGTCATTTTCTCTAATAGGATCCAAATCTAGAGGAGAGAATGTGGATACTAG	scaffold11581	1127139	1	4.73568e-29	Chromosome01	21326978	1	5.18104e-29	18:G>A	18	1	0.43617	0.914894	0.085106	0.56383	0.351064	0.491852	0.155727	0.323789	5.48148	7.74766	1	2	0	0	1	2	1	0	1	2	1	1	2	2	2	1	1	2	2	2	1	1	2	1	1	2
13855387|F|0-29:A>G-29:A>G	TGCAGAAGATGATGCACGACTAGTCAAACACATTGGCCAGAGTTTCAGATTTTCTGCTGTCGAGGTACA	TGCAGAAGATGATGCACGACTAGTCAAACACATTGGCCAGAGTTTCAGATTTTCTGCTGTCGAGGTACA	scaffold12794	1205563	1	4.73568e-29	Chromosome06	21151334	1	5.18104e-29	29:A>G	29	1	0.659574	0.893617	0.106383	0.340426	0.553191	0.449072	0.190131	0.319602	11.5641	12.3333	1	1	1	2	2	1	2	2	2	0	2	2	0	1	1	1	2	1	1	0	2	2	2	2	2	0
20471221|F|0-15:A>G-15:A>G	TGCAGAAGATGCTCTACAACCTATATTGAAGCTATTATTGGCTCCAGATGGTGAAGAGCTTCGACATTT	TGCAGAAGATGCTCTACAACCTATATTGAAGCTATTATTGGCTCCAGATGGTGAAGAGCTTCGACATTT	scaffold10015	49733	1	4.73568e-29	Chromosome02	31010673	1	5.18104e-29	15:A>G	15	1	1	0.085106	0.914894	0	0.085106	0	0.155727	0.077863	12.2203	4.375	1	0	0	0	0	0	0	0	0	0	0	0	0	0	0	0	0	0	0	0	0	0	0	0	0	0
7111527|F|0-24:G>A-24:G>A	TGCAGAAGATGGAATTGGACTGAAGCAGCTTGAAGAACTTGTCTTGAAGGTTTAGGCCTGATATAAGAT	TGCAGAAGATGGAATTGGACTGAAGCAGCTTGAAGAACTTGTCTTGAAGGTTTAGGCCTGATATAAGAT	scaffold03219	280675	1	2.2033e-27	Chromosome13	802923	1	2.4105e-27	24:G>A	24	1	1	0.085106	0.914894	0	0.085106	0	0.155727	0.077863	10.5593	5.75	1	0	0	0	0	0	0	0	0	0	0	0	0	0	0	0	0	0	0	0	0	0	0	0	0	0
7143110|F|0-24:G>A-24:G>A	TGCAGAAGATGTAAAGATCTTCCCGCACTGGGTCAGCTTCCCTTCCTCAAGGTCCTTTACTTACAAGGA	TGCAGAAGATGTAAAGATCTTCCCGCACTGGGTCAGCTTCCCTTCCTCAAGGTCCTTTACTTACAAGGA	scaffold04260	165828	1	4.73568e-29	Chromosome05	25787881	1	5.18104e-29	24:G>A	24	1	0.351064	0.957447	0.042553	0.648936	0.308511	0.455636	0.081485	0.26856	3.97222	6.90351	1	1	2	1	1	1	1	2	1	1	1	1	1	1	1	2	1	1	1	1	1	1	2	1	1	2
7109764|F|0-30:C>T-30:C>T	TGCAGAAGATGTTTCTGCCTTATCAGAAGGCTTTGCATCTCCATTTGATTTTTCTGATTCAACATTTGA	TGCAGAAGATGTTTCTGCCTTATCAGAAGGCTTTGCATCTCCATTTGATTTTTCTGATTCAACATTTGA	scaffold06278	285423	1	4.73568e-29	Chromosome03	23192739	1	2.4105e-27	30:C>T	30	1	0.957447	0.659574	0.340426	0.042553	0.617021	0.081485	0.449072	0.265278	15.6549	12.6579	1	0	0	2	0	0	2	2	2	2	2	2	2	0	0	2	2	2	0	1	0	2	2	0	0	0
13855388|F|0-60:G>A-60:G>A	TGCAGAAGATTGCTTTCATGCCAAGAAAGTTTGAAGTTGACTATCAAAACCCATTCAATCGGGATCACC	TGCAGAAGATTGCTTTCATGCCAAGAAAGTTTGAAGTTGACTATCAAAACCCATTCAATCGGGATCACC	scaffold11236	189144	1	2.2033e-27	Chromosome10	3815038	1	2.4105e-27	60:G>A	60	1	0.989362	0.37234	0.62766	0.010638	0.361702	0.02105	0.467406	0.244228	9.95726	6.72093	1	0	0	0	0	0	2	0	2	0	2	2	0	2	0	0	2	0	0	0	2	0	0	2	0	0
7111528|F|0-27:G>T-27:G>T	TGCAGAAGATTTCCCAGAATCTTTTGTGTCTTCAGCACTGCATGATAAGGATATGTCAAATGATTTTGC	TGCAGAAGATTTCCCAGAATCTTTTGTGTCTTCAGCACTGCATGATAAGGATATGTCAAATGATTTTGC	scaffold03581	997787	1	4.73568e-29	Chromosome05	2036382	1	5.18104e-29	27:G>T	27	1	0.925532	0.308511	0.691489	0.074468	0.234043	0.137845	0.426664	0.282254	12.1376	8.47222	1	0	1	1	0	2	0	2	0	2	0	0	0	0	2	0	0	0	0	0	0	0	2	0	0	1
7119807|F|0-19:G>A-19:G>A	TGCAGAAGATTTGGACAGTGATTTGCTAAAATAGCCTTGACAATTCTCTTATTTCCGGTTTTATCTTTC	TGCAGAAGATTTGGACAGTGATTTGCTAAAATAGCCTTGACAATTCTCTTATTTCCGGTTTTATCTTTC	scaffold09335	142962	1	4.73568e-29	Chromosome13	22803117	1	5.18104e-29	19:G>A	19	1	1	0.074468	0.925532	0	0.074468	0	0.137845	0.068923	13.7034	7.8	1	0	2	0	0	0	0	0	0	0	0	2	0	0	2	0	0	0	0	0	0	0	0	0	0	2
7111529|F|0-52:G>A-52:G>A	TGCAGAAGCAAAACCATTCTGAGCAGCCATTGATTTCTGTCGTTGATTAGATGTTCACCACCACAGGAG	TGCAGAAGCAAAACCATTCTGAGCAGCCATTGATTTCTGTCGTTGATTAGATGTTCACCACCACAGGAG	scaffold04083	242975	1	2.2033e-27	Chromosome14	5522382	1	2.4105e-27	52:G>A	52	1	0.925532	0.606383	0.393617	0.074468	0.531915	0.137845	0.477365	0.307605	15.0556	11.9857	1	2	0	0	0	0	2	0	2	0	2	2	2	2	2	0	2	1	1	0	1	0	2	0	0	0
7111562|F|0-9:G>A-9:G>A	TGCAGAAGCGAAATCAAGAGGAGATGATGCTTTCAGAAGAAAGGATTATTGTATGGCTGTGGATGCTTA	TGCAGAAGCGAAATCAAGAGGAGATGATGCTTTCAGAAGAAAGGATTATTGTATGGCTGTGGATGCTTA	scaffold03614	2755504	1	4.73568e-29	Chromosome09	26820178	1	5.18104e-29	9:G>A	9	1	0.989362	0.361702	0.638298	0.010638	0.351064	0.02105	0.461747	0.241399	14.8461	9.07143	1	2	0	0	0	0	0	2	0	2	0	0	2	2	0	0	0	2	0	0	0	0	0	2	2	2
7125193|F|0-30:T>A-30:T>A	TGCAGAAGCAAATATGCTGTACTTGGAATCTCCTGCTGGAGTTGGCTTCTCCTACACTGTTACAGATCG	TGCAGAAGCAAATATGCTGTACTTGGAATCTCCTGCTGGAGTTGGCTTCTCCTACACTGTTAC	scaffold02765	30725	1	3.26801e-25	Chromosome08	7111923	1	3.48359e-25	30:T>A	30	0.968085	0.989011	0.076923	0.923077	0.010989	0.065934	0.021737	0.142012	0.081874	11.3628	6.42857	1	0	0	0	0	0	0	0	0	0	0	0	0	0	0	0	0	-	0	0	0	0	0	0	0	0
20471230|F|0-47:C>T-47:C>T	TGCAGAAGCAAGATTGAAGACATACCACGTGGCAACAGCCCATTGCCCCTCTCGAATTTCATGGGCCAC	TGCAGAAGCAAGATTGAAGACATACCACGTGGCAACAGCCCATTGCCCCTCTCGAATTTCATGGGCCAC	scaffold00823	350662	1	4.73568e-29	Chromosome08	4323945	1	5.18104e-29	47:C>T	47	0.989362	0.989247	0.043011	0.956989	0.010753	0.032258	0.021274	0.082322	0.051798	7.65217	3.8	1	1	0	0	0	0	0	0	0	0	0	0	0	0	0	0	0	0	0	0	0	0	0	0	0	0
7119808|F|0-27:G>A-27:G>A	TGCAGAAGCAAGGAACTCAGCTCCTCCGCAATCTGCTTCAGAAGCTGCCCGCCAAATGCTGACAAAGAA	TGCAGAAGCAAGGAACTCAGCTCCTCCGCAATCTGCTTCAGAAGCTGCCCGCCAAATGCTGACAAAGAA	scaffold02431	95654	1	2.2033e-27	Chromosome08	31693268	1	2.4105e-27	27:G>A	27	0.989362	1	0.107527	0.892473	0	0.107527	0	0.19193	0.095965	7.52137	4.30769	1	2	2	0	0	0	0	0	0	0	0	0	0	0	0	0	0	0	0	0	0	0	0	0	2	0
7143112|F|0-65:C>A-65:C>A	TGCAGAAGCAAGGTAAGTGGGCAAGATGGCGGTGCACATGCAACGCAGCACCAGATCATAAAATCCCAT	TGCAGAAGCAAGGTAAGTGGGCAAGATGGCGGTGCACATGCAACGCAGCACCAGATCATAAAATCCCAT	scaffold09570	104845	1	4.73568e-29	Chromosome03	3442247	1	5.18104e-29	65:C>A	65	1	1	0.06383	0.93617	0	0.06383	0	0.119511	0.059756	11.0085	7	1	0	0	0	0	0	0	0	0	0	0	0	0	0	0	0	0	0	0	0	0	0	0	0	0	0
7111537|F|0-21:C>G-21:C>G	TGCAGAAGCAATCTACTCTGGCAAACAAAAGATCAAGATTGCTCATTTTTACGATTGCCTTCAAGATGT	TGCAGAAGCAATCTACTCTGGCAAACAAAAGATCAAGATTGCTCATTTTTACGATTGCCTTCAAGATGT	scaffold07100	169392	2	4.73568e-29	Chromosome16	2777281	2	5.18104e-29	21:C>G	21	1	1	0.404255	0.595745	0	0.404255	0	0.481666	0.240833	24.161	14.1346	1	0	2	2	2	0	0	2	0	2	0	0	2	2	2	2	0	2	0	0	2	2	2	0	2	2
7107012|F|0-68:A>T-68:A>T	TGCAGAAGCACATTTAGAGACTCAGTGTTATATTCAAACCCAAACTCTTTTGAGTTTCCAAACATTTGA	TGCAGAAGCACATTTAGAGACTCAGTGTTATATTCAAACCCAAACTCTTTTGAGTTTCCAAACATTTGA	scaffold07520	1012328	1	4.73568e-29	Chromosome01	24655055	1	5.18104e-29	68:A>T	68	1	1	0.234043	0.765957	0	0.234043	0	0.358533	0.179267	10.2458	5.87097	1	0	2	2	0	0	0	2	0	0	0	0	2	0	2	2	0	0	2	0	0	2	2	0	0	0
7122610|F|0-67:G>A-67:G>A	TGCAGAAGCACCAGGGCCTTCTGACGATAGCACGCTAGTGTTGGCAGCTAAGAGGACAAATCGACCCGA	TGCAGAAGCACCAGGGCCTTCTGACGATAGCACGCTAGTGTTGGCAGCTAAGAGGACAAATCGACCCGA	scaffold03604	269393	1	6.12599e-28	Chromosome06	17384740	1	6.7021e-28	67:G>A	67	0.989362	0.817204	0.784946	0.215054	0.182796	0.602151	0.298763	0.337611	0.318187	9.375	9.5	1	2	2	2	2	1	2	2	2	1	2	2	0	1	2	2	2	2	1	0	2	0	0	0	2	0
7111540|F|0-40:C>T-40:C>T	TGCAGAAGCACGTTGAAATGGCAGCCGAGATAAAAAATCTCGACACTGATTTGCAAATGTTAGTTTATG	TGCAGAAGCACGTTGAAATGGCAGCCGAGATAAAAAATCTCGACACTGATTTGCAAATGTTAGTTTATG	scaffold05434	1245	1	2.2033e-27	Chromosome01	31202919	1	2.4105e-27	40:C>T	40	1	0.968085	0.393617	0.606383	0.031915	0.361702	0.061793	0.477365	0.269579	15.9381	9.67391	1	0	0	0	0	0	2	0	2	0	2	2	0	0	0	0	2	2	0	1	2	0	0	1	0	2
20507312|F|0-26:A>C-26:A>C	TGCAGAAGCACTCCCCCAATATTTTCATACCGAGCAGTCCATGCCTTTGCGGAGGAGTTTACAGATCGG	TGCAGAAGCACTCCCCCAATATTTTCATACCGAGCAGTCCATGCCTTTGCGGAGGAGTTTAC	scaffold10689	312259	1	1.14525e-24	Chromosome10	663686	1	1.25293e-24	26:A>C	26	1	1	0.265957	0.734043	0	0.265957	0	0.390448	0.195224	44.6186	12.5	1	0	2	0	0	2	0	2	0	0	0	0	0	0	0	2	0	2	0	2	2	0	0	0	0	0
15484456|F|0-53:C>T-53:C>T	TGCAGAAGCACTGGAATTGGAGTACAATCCACCTAATTTCAGTGCCAAGCCCACACAGTATAGCATGGA	TGCAGAAGCACTGGAATTGGAGTACAATCCACCTAATTTCAGTGCCAAGCCCACACAGTATAGCATGGA	scaffold04796	360870	1	4.73568e-29	Chromosome03	1441791	1	5.18104e-29	53:C>T	53	0.989362	1	0.053763	0.946237	0	0.053763	0	0.101746	0.050873	26.8803	9.71429	1	0	0	2	0	0	0	0	0	0	0	0	0	0	0	0	0	0	0	0	0	0	0	2	0	0
100001407|F|0-30:C>T-30:C>T	TGCAGAAGCAGAAAAACAAGGCAGAGTACCCGAAAACAAATTAGACCCAAGATTGAGAAAAACTAATGG	TGCAGAAGCAGAAAAACAAGGCAGAGTACCCGAAAACAAATTAGACCCAAGATTGAGAAAAACTAATGG	scaffold08757	485554	2	4.73568e-29	Chromosome08	27109861	2	5.18104e-29	30:C>T	30	0.946809	1	0.044944	0.955056	0	0.044944	0	0.085848	0.042924	3.52727	3	1	0	0	0	0	0	0	0	0	0	0	0	0	0	0	0	0	0	0	0	0	2	0	0	0	2
7111542|F|0-15:T>C-15:T>C	TGCAGAAGCAGAATCTATGGCACACCCAATTACCCACAGCGGAGAATGGACGTGGACCATGATACAACT	TGCAGAAGCAGAATCTATGGCACACCCAATTACCCACAGCGGAGAATGGACGTGGACCATGATACAACT	scaffold06683	311246	1	4.73568e-29	Chromosome05	22811004	1	5.18104e-29	15:T>C	15	1	1	0.085106	0.914894	0	0.085106	0	0.155727	0.077863	13.3814	6.8	1	0	0	0	0	0	0	0	0	0	0	0	0	2	0	0	0	2	0	0	0	0	0	0	0	0
7110868|F|0-27:C>A-27:C>A	TGCAGAAGCAGCAGCAGATGAAACTCTCGGAAAACGGAACACACCTGCAACTTTTGCTAGCTCACGCTT	TGCAGAAGCAGCAGCAGATGAAACTCTCGGAAAACGGAACACACCTGCAACTTTTGCTAGCTCACGCTT	scaffold02952	21298	1	4.73568e-29	Chromosome07	6279200	1	5.18104e-29	27:C>A	27	0.989362	0.956989	0.387097	0.612903	0.043011	0.344086	0.082322	0.474506	0.278414	10.955	7.8	1	2	2	0	0	0	0	2	0	2	0	0	1	0	0	1	0	0	2	0	0	2	2	0	0	2
7119809|F|0-64:C>A-64:C>A	TGCAGAAGCAGCAGTTCAAATCTCAGAACCACATAAACCCAAACCCTCAAAAGCACAAAATCCACGGAA	TGCAGAAGCAGCAGTTCAAATCTCAGAACCACATAAACCCAAACCCTCAAAAGCACAAAATCCACGGAA	scaffold09492	89798	1	4.73568e-29	Chromosome04	24011583	1	5.18104e-29	64:C>A	64	0.989362	0.924731	0.204301	0.795699	0.075269	0.129032	0.139207	0.325124	0.232166	17.213	9.76923	1	0	2	1	0	0	0	1	0	0	0	0	2	0	0	2	0	0	2	0	0	2	0	0	0	0
7146326|F|0-32:A>G-32:A>G	TGCAGAAGCAGCCAAAATGAAATAGCTCAGCAATGATGCAATCATTCTTGCTCTATCCGTGAGCTCAAA	TGCAGAAGCAGCCAAAATGAAATAGCTCAGCAATGATGCAATCATTCTTGCTCTATCCGTGAGCTCAAA	scaffold07520	235091	1	2.2033e-27	Chromosome01	23876411	1	2.4105e-27	32:A>G	32	0.978723	1	0.119565	0.880435	0	0.119565	0	0.210539	0.105269	11.4483	6.23077	1	2	0	0	0	0	0	0	0	0	0	0	0	0	0	0	0	0	2	0	0	0	0	0	0	0
7111545|F|0-6:A>G-6:A>G	TGCAGAAGCAGCCATCATAGACTTCCACAGGAAAGCTGAGACAACCTCAACTCGTGTGGGACATTTCTC	TGCAGAAGCAGCCATCATAGACTTCCACAGGAAAGCTGAGACAACCTCAACTCGTGTGGGACATTTCTC	scaffold06708	337273	1	4.73568e-29	Chromosome05	17871153	1	5.18104e-29	6:A>G	6	0.989362	0.688172	0.709677	0.290323	0.311828	0.397849	0.429183	0.412071	0.420627	5.79518	6.85882	1	2	0	0	2	0	1	0	1	2	1	2	2	1	2	2	1	2	0	2	2	2	2	2	2	2
7111551|F|0-38:T>C-38:T>C	TGCAGAAGCATCAAGTTCTGAATCCAAAGCAGCAGGCTTAGTTTCCAATAATGTGCCACAAAACAAAAA	TGCAGAAGCATCAAGTTCTGAATCCAAAGCAGCAGGCTTAGTTTCCAATAATGTGCCACAAAACAAAAA	scaffold03283	132296	1	4.73568e-29	Chromosome12	28088395	1	5.18104e-29	38:T>C	38	0.978723	1	0.163043	0.836957	0	0.163043	0	0.272921	0.13646	7.09483	3.55556	1	0	0	0	2	0	0	2	0	2	0	0	0	0	0	0	0	0	0	0	0	0	0	0	0	0
7107016|F|0-53:C>G-53:C>G	TGCAGAAGCATGCAAAGCATTAGAATAAGCAAATCCAAACTCCCTGCTTATTTCCAGTGCAGATAGTAA	TGCAGAAGCATGCAAAGCATTAGAATAAGCAAATCCAAACTCCCTGCTTATTTCCAGTGCAGATAGTAA	scaffold03602	536286	1	4.73568e-29	Chromosome09	4525446	1	5.18104e-29	53:C>G	53	0.978723	1	0.141304	0.858696	0	0.141304	0	0.242675	0.121337	8.26724	5.42105	1	2	0	2	0	0	0	0	0	2	0	2	0	0	0	0	0	0	2	2	0	2	0	0	0	2
7143117|F|0-34:C>A-34:C>A	TGCAGAAGCATGTAATATACAAAAAAATATGCAACACAATACAGAATAATATTTATGCAGTTCACCCTC	TGCAGAAGCATGTAATATACAAAAAAATATGCAACACAATACAGAATAATATTTATGCAGTTCACCCTC	scaffold06914	681227	1	4.73568e-29	Chromosome07	1578935	1	5.18104e-29	34:C>A	34	0.957447	0.577778	0.6	0.4	0.422222	0.177778	0.487901	0.48	0.483951	5.31818	4.27941	1	2	0	1	0	2	1	2	1	0	1	0	2	0	0	2	1	0	1	1	0	2	1	1	0	0
7111555|F|0-67:A>T-67:A>T	TGCAGAAGCCACATGATGTTTCAAAATTCATGAGTAACTCAGCACTGACAGTGATATAGAATGGAGAAG	TGCAGAAGCCACATGATGTTTCAAAATTCATGAGTAACTCAGCACTGACAGTGATATAGAATGGAGAAG	scaffold03000	159204	1	6.12599e-28	Chromosome03	21239039	1	6.7021e-28	67:A>T	67	1	0.882979	0.531915	0.468085	0.117021	0.414894	0.206655	0.497963	0.352309	20.0583	14.4918	1	0	2	2	2	0	0	2	0	2	0	0	1	0	0	1	0	0	2	0	0	1	1	0	2	2
7106819|F|0-24:T>A-24:T>A	TGCAGAAGCCAGACGACGGGAAGGTTTTGAAGGTAACTTAGTGCCGGTTTGGCATTGTGGCTTGAGGGC	TGCAGAAGCCAGACGACGGGAAGGTTTTGAAGGTAACTTAGTGCCGGTTTGGCATTGTGGCTTGAGGGC	scaffold00918	46367	1	4.73568e-29	Chromosome16	6787663	1	5.18104e-29	24:T>A	24	0.989362	0.956989	0.591398	0.408602	0.043011	0.548387	0.082322	0.483293	0.282807	18.973	15.8767	1	2	0	2	2	0	2	2	2	0	2	2	2	1	2	0	2	2	2	2	1	0	2	0	2	0
7119812|F|0-13:G>A-13:G>A	TGCAGAAGCCATTGTTGCTTGTAGTTGCTTGGCTCTGATATTGTTGGGTTTGTATTTGGAGAGTTAGGT	TGCAGAAGCCATTGTTGCTTGTAGTTGCTTGGCTCTGATATTGTTGGGTTTGTATTTGGAGAGTTAGGT	scaffold01664	124888	1	4.73568e-29	Chromosome09	7289722	1	5.18104e-29	13:G>A	13	1	0.87234	0.819149	0.180851	0.12766	0.691489	0.222725	0.296288	0.259507	11.6765	10.8144	1	2	1	0	2	0	2	2	2	0	2	1	1	2	2	2	2	2	2	0	2	1	2	2	2	2
7128184|F|0-14:G>A-14:G>A	TGCAGAAGCCGCACGGATGAGGTGAATGTACCAATAAAATGTGTATTGGGTTTCATTAGGACATCACTG	TGCAGAAGCCGCACGGATGAGGTGAATGTACCAATAAAATGTGTATTGGGTTTCATTAGGACATCACTG	scaffold02264	730458	1	4.73568e-29	Chromosome09	28703371	1	5.18104e-29	14:G>A	14	0.851064	0.9	0.2625	0.7375	0.1	0.1625	0.18	0.387188	0.283594	12.8295	7.07143	1	2	1	0	-	0	0	-	0	-	0	0	0	0	0	1	0	0	1	2	2	0	1	0	-	2
20493078|F|0-55:C>G-55:C>G	TGCAGAAGCGTTTCTACTTTTCTAATCTTTTATGGGTTTGTGATTGTGACTCCGGCGCTTTGGCGTGGG	TGCAGAAGCGTTTCTACTTTTCTAATCTTTTATGGGTTTGTGATTGTGACTCCGGCGCTTTGGCGTGGG	scaffold00345	86814	1	4.73568e-29	Chromosome10	9144816	1	5.18104e-29	55:C>G	55	0.904255	0.929412	0.164706	0.835294	0.070588	0.094118	0.131211	0.275156	0.203183	4.28125	2.84211	1	0	0	0	0	2	0	0	0	-	0	1	0	0	0	0	0	0	2	-	1	-	0	1	0	0
13858608|F|0-35:C>T-35:C>T	TGCAGAAGCGTTTCTTTTCACCATGTGTCTGCAAACGTGTGGTGAATAATTGTTGTTGTTTCATGAAAT	TGCAGAAGCGTTTCTTTTCACCATGTGTCTGCAAACGTGTGGTGAATAATTGTTGTTGTTTCATGAAAT	scaffold10114	131104	1	4.73568e-29	Chromosome16	24758710	1	5.18104e-29	35:C>T	35	1	0.93617	0.585106	0.414894	0.06383	0.521277	0.119511	0.485514	0.302512	14.1892	9.8	1	2	0	0	0	2	2	0	2	1	2	0	2	0	0	0	2	0	0	0	0	0	2	2	0	2
7143119|F|0-7:G>A-7:G>A	TGCAGAAGCTAAACAAATGATGTATTATAAACCTATATCTTCTAAATTATATATCATAATGTATTGAAT	TGCAGAAGCTAAACAAATGATGTATTATAAACCTATATCTTCTAAATTATATATCATAATGTATTGAAT	scaffold01237	196390	2	2.2033e-27	Chromosome17	7483311	1	2.4105e-27	7:G>A	7	1	0.93617	0.606383	0.393617	0.06383	0.542553	0.119511	0.477365	0.298438	6.8	5.55882	1	0	0	0	2	2	2	0	2	1	2	0	0	2	0	0	2	0	0	0	2	0	0	1	2	0
20471262|F|0-26:T>C-26:T>C	TGCAGAAGCTACTCGTTGTCTACTAATTCCCTTGAAAGTTATGATATGCAAAGGGCCAATTTGATACCT	TGCAGAAGCTACTCGTTGTCTACTAATTCCCTTGAAAGTTATGATATGCAAAGGGCCAATTTGATACCT	scaffold03699	62625	1	1.0251e-25	Chromosome02	13591288	1	1.1215e-25	26:T>C	26	1	0.680851	0.617021	0.382979	0.319149	0.297872	0.434586	0.472612	0.453599	7.17284	6.68571	1	0	2	0	0	0	1	0	1	0	1	2	2	1	0	0	1	2	2	2	1	0	0	1	0	2
7110869|F|0-50:G>C-50:G>C	TGCAGAAGCTATCAAATCCTTGCTTCCGTCCTTCTCTCAGCTGTCCTTTTGGTTGTTAGGAGATCTGCG	TGCAGAAGCTATCAAATCCTTGCTTCCGTCCTTCTCTCAGCTGTCCTTTTGGTTGTTAGGAGATCTGCG	scaffold05280	593026	1	4.73568e-29	Chromosome02	1453680	1	5.18104e-29	50:G>C	50	0.978723	0.967391	0.217391	0.782609	0.032609	0.184783	0.063091	0.340265	0.201678	18.8909	14.5	1	0	0	2	0	0	0	0	0	0	0	0	2	0	0	1	0	0	-	0	0	2	0	-	0	0
7111571|F|0-33:A>T-33:A>T	TGCAGAAGCTCAATTATGAGGAAGGTTTAGTCAAGGGTGCCCAATGTTGAAGTTCCATTGTGTTAGAAT	TGCAGAAGCTCAATTATGAGGAAGGTTTAGTCAAGGGTGCCCAATGTTGAAGTTCCATTGTGTTAGAAT	scaffold08994	92309	1	2.2033e-27	Chromosome18	4843483	1	2.4105e-27	33:A>T	33	1	0.414894	0.957447	0.042553	0.585106	0.37234	0.485514	0.081485	0.283499	11.42	17.4035	1	2	1	2	1	2	1	2	1	1	1	1	1	1	2	2	1	1	2	2	2	2	1	1	2	1
7107019|F|0-21:A>C-21:A>C	TGCAGAAGCTCGAGAAAGGGCAGCTGCTGCAACTAGAGCAAATCAACAGAGGGATGATAATGACCTTGA	TGCAGAAGCTCGAGAAAGGGCAGCTGCTGCAACTAGAGCAAATCAACAGAGGGATGATAATGACCTTGA	scaffold01072	65336	1	4.73568e-29	Chromosome13	6244745	1	5.18104e-29	21:A>C	21	0.989362	0.548387	0.731183	0.268817	0.451613	0.27957	0.495317	0.393109	0.444213	10.1385	10.9412	1	1	2	2	0	1	1	0	1	2	1	2	0	1	0	0	1	1	2	2	1	0	2	1	0	0
20493079|F|0-40:G>T-40:G>T	TGCAGAAGCTCGTCCCCAAGTGCCGGATTGTCGGTCGACCGGAAGGTGGCTGAATGATGGAAGGAATGG	TGCAGAAGCTCGTCCCCAAGTGCCGGATTGTCGGTCGACCGGAAGGTGGCTGAATGATGGAAGGAATGG	scaffold06206	50470	1	4.73568e-29	Chromosome11	26349458	1	5.18104e-29	40:G>T	40	1	0.968085	0.170213	0.829787	0.031915	0.138298	0.061793	0.282481	0.172137	21.9737	15.0909	1	2	0	0	2	0	0	0	0	1	0	0	0	0	0	0	0	0	0	2	0	2	0	0	2	0
13855393|F|0-36:C>T-36:C>T	TGCAGAAGCTCTATGCTCAAAAGGTACAGGTGGATACAGTCGAAGTGTCTCGCATACAACAGCATGCAG	TGCAGAAGCTCTATGCTCAAAAGGTACAGGTGGATACAGTCGAAGTGTCTCGCATACAACAGCATGCAG	scaffold05335	226971	3	4.73568e-29	Chromosome17	25166239	3	5.18104e-29	36:C>T	36	1	0.989362	0.106383	0.893617	0.010638	0.095745	0.02105	0.190131	0.105591	25.5983	16.5	1	0	0	0	0	0	0	0	0	0	0	0	0	0	0	0	0	2	0	0	0	0	2	0	0	0
7143122|F|0-40:A>C-40:A>C	TGCAGAAGCTCTGCATAACTTTTCTTATTAGCTGCCAAGAAATGTAATTTCCATATTGGTGCTGACATA	TGCAGAAGCTCTGCATAACTTTTCTTATTAGCTGCCAAGAAATGTAATTTCCATATTGGTGCTGACATA	scaffold09501	455015	1	4.73568e-29	Chromosome03	2077094	1	5.18104e-29	40:A>C	40	1	1	0.138298	0.861702	0	0.138298	0	0.238343	0.119172	11.0169	5.4	1	0	0	2	0	0	0	0	0	2	0	0	0	0	0	0	0	0	0	0	0	0	0	0	0	0
7139085|F|0-12:T>C-12:T>C	TGCAGAAGCTCTTATAGGTGTCGCAATGGGAATCGAACCGCGGTTGGTCGAGCCTAAAGACAGTTCAGT	TGCAGAAGCTCTTATAGGTGTCGCAATGGGAATCGAACCGCGGTTGGTCGAGCCTAAAGACAGTTCAGT	scaffold03049	374089	1	1.0251e-25	Chromosome03	755722	1	1.1215e-25	12:T>C	12	0.893617	0.952381	0.059524	0.940476	0.047619	0.011905	0.090703	0.111961	0.101332	7.36	6.85714	1	0	-	0	0	0	0	0	0	1	0	0	0	0	0	0	0	0	0	0	0	2	0	0	0	0
7111574|F|0-33:A>T-33:A>T	TGCAGAAGCTGAAAACAGGAAGAAGCAACAAAAAAAGGAGTACAATTCAAATGCCAATTTACAGATCGG	TGCAGAAGCTGAAAACAGGAAGAAGCAACAAAAAAAGGAGTACAATTCAAATGCCAATTTAC	scaffold03850	59824	1	5.32832e-23	Chromosome03	18248213	1	5.82929e-23	33:A>T	33	0.989362	0.83871	0.784946	0.215054	0.16129	0.623656	0.270552	0.337611	0.304081	14.202	13.5281	1	0	2	0	2	0	2	0	2	1	2	2	2	0	0	1	2	2	2	2	0	2	2	0	2	1
7111577|F|0-36:A>G-36:A>G	TGCAGAAGCTGCCGCACAAGAAACCCGTGGAAAACGAAAGACACCTTCACTTCTGGAGAGTTCCCTTTT	TGCAGAAGCTGCCGCACAAGAAACCCGTGGAAAACGAAAGACACCTTCACTTCTGGAGAGTTCCCTTTT	scaffold03299	248560	1	1.0251e-25	Chromosome18	4411432	1	1.1215e-25	36:A>G	36	1	1	0.095745	0.904255	0	0.095745	0	0.173155	0.086578	8.84746	4.27273	1	0	0	0	0	0	0	0	0	0	0	0	0	0	0	0	0	0	2	0	0	0	0	2	0	2
7111579|F|0-44:C>G-44:C>G	TGCAGAAGCTGTTTGATTTCATCTATATGATCAAAGATACTCTGCATTTTTGCATAAACTCAACTTTGG	TGCAGAAGCTGTTTGATTTCATCTATATGATCAAAGATACTCTGCATTTTTGCATAAACTCAACTTTGG	scaffold04209	250238	1	4.73568e-29	Chromosome05	7812559	1	5.18104e-29	44:C>G	44	1	1	0.095745	0.904255	0	0.095745	0	0.173155	0.086578	19.6949	9.11111	1	0	0	0	0	0	0	0	0	0	0	0	0	0	0	0	0	0	0	0	0	0	0	0	0	2
7107022|F|0-51:G>T-51:G>T	TGCAGAAGCTTGTGGCAATGAATTCTTAGTTGTTTTTTGTGTTTCTGGGTTGGTTGGATGTATGGAATT	TGCAGAAGCTTGTGGCAATGAATTCTTAGTTGTTTTTTGTGTTTCTGGGTTGGTTGGATGTATGGAATT	scaffold04851	114016	1	4.73568e-29	Chromosome17	18351416	1	5.18104e-29	51:G>T	51	0.957447	0.822222	0.333333	0.666667	0.177778	0.155556	0.292346	0.444444	0.368395	8.8764	6.89189	1	1	0	1	1	0	0	2	0	-	0	0	0	0	1	-	0	0	1	0	2	0	0	0	1	0
7107023|F|0-59:G>A-59:G>A	TGCAGAAGCTTGTTTAGATGGAACACTCCCTCCTCCACTCAATACACTCCCTGGAGAACGAAAAAATTA	TGCAGAAGCTTGTTTAGATGGAACACTCCCTCCTCCACTCAATACACTCCCTGGAGAACGAAAAAATTA	scaffold03614	1804638	1	4.73568e-29	Chromosome09	25871628	1	5.18104e-29	59:G>A	59	1	0.978723	0.43617	0.56383	0.021277	0.414894	0.041648	0.491852	0.26675	15.1897	9.16327	1	0	2	0	0	0	2	0	2	0	2	2	0	2	0	0	2	0	0	0	0	0	0	2	0	0
20110230|F|0-44:A>G-44:A>G	TGCAGAAGCTTTTTTGCAGAACGTGCAGCAATCTCTCTATTTCCATGAACTAAACAAGCACTAAGAAGA	TGCAGAAGCTTTTTTGCAGAACGTGCAGCAATCTCTCTATTTCCATGAACTAAACAAGCACTAAGAAGA	scaffold07991	618535	1	4.73568e-29	Chromosome01	27336836	1	5.18104e-29	44:A>G	44	1	1	0.287234	0.712766	0	0.287234	0	0.409461	0.204731	9.18644	4.9697	1	0	0	0	0	0	2	0	2	0	2	0	0	0	0	0	2	2	0	0	2	0	0	0	0	0
7107025|F|0-39:A>G-39:A>G	TGCAGAAGGAAAAGATGAACCCTTAGAAAAGAAAAAGGGAAGCAAAACAAGAGCTTCTCTCTGAAAAAT	TGCAGAAGGAAAAGATGAACCCTTAGAAAAGAAAAAGGGAAGCAAAACAAGAGCTTCTCTCTGAAAAAT	scaffold11581	942281	1	4.73568e-29	Chromosome01	21145129	1	5.18104e-29	39:A>G	39	1	0.925532	0.297872	0.702128	0.074468	0.223404	0.137845	0.418289	0.278067	9.46729	6.72222	1	0	0	0	1	0	0	0	0	2	0	2	0	0	2	1	0	0	2	0	0	1	0	0	1	2
7111587|F|0-32:C>T-32:C>T	TGCAGAAGGAAATATGAGATAGAGAGTGAAGACTGAGACTGTAAGAGGTTAGATACCATGTATGGACCA	TGCAGAAGGAAATATGAGATAGAGAGTGAAGACTGAGACTGTAAGAGGTTAGATACCATGTATGGACCA	scaffold10173	1032195	1	4.73568e-29	Chromosome15	10153011	1	5.18104e-29	32:C>T	32	1	0.989362	0.180851	0.819149	0.010638	0.170213	0.02105	0.296288	0.158669	7.50427	4.3	1	0	0	0	0	0	0	2	0	0	0	0	0	0	2	0	0	0	2	0	0	0	0	0	0	0
20484817|F|0-7:G>A-7:G>A	TGCAGAAGGAACAAGAGAAGAAAGAGATACACAACCAAACGCCAATTGCACATTCAAGACACGCACGCA	TGCAGAAGGAACAAGAGAAGAAAGAGATACACAACCAAACGCCAATTGCACATTCAAGACACGCACGCA	scaffold09434	35316	1	4.73568e-29	Chromosome14	5046217	1	5.18104e-29	7:G>A	7	0.978723	1	0.065217	0.934783	0	0.065217	0	0.121928	0.060964	5.43966	2.83333	1	0	0	0	0	0	0	0	0	0	0	0	0	0	0	0	0	0	0	0	0	0	0	0	0	0
7111588|F|0-20:T>C-20:T>C	TGCAGAAGGAACATGTGCTTTAGTACTAATCACAGTTTCATTACGTTTCTGCTTCTTTCTCATTCTCTT	TGCAGAAGGAACATGTGCTTTAGTACTAATCACAGTTTCATTACGTTTCTGCTTCTTTCTCATTCTCTT	scaffold08359	1393032	1	4.73568e-29	Chromosome14	6969274	1	5.18104e-29	20:T>C	20	1	0.925532	0.765957	0.234043	0.074468	0.691489	0.137845	0.358533	0.248189	10	7.95556	1	0	2	2	2	2	2	2	2	1	2	2	0	2	2	2	2	0	0	2	0	2	0	2	2	2
7111589|F|0-53:C>A-53:C>A	TGCAGAAGGAAGAGCCCATCAACGCCATGAAAATTCCCCCTTCTCATTGCACACATCTTGCTTTCCATC	TGCAGAAGGAAGAGCCCATCAACGCCATGAAAATTCCCCCTTCTCATTGCACACATCTTGCTTTCCATC	scaffold06890	178169	1	2.85015e-26	Chromosome09	1828196	1	3.11819e-26	53:C>A	53	0.989362	0.150538	0.956989	0.043011	0.849462	0.107527	0.255752	0.082322	0.169037	8.83333	16.3125	1	2	1	1	1	1	1	1	1	1	1	1	1	1	1	1	1	2	1	1	2	1	0	1	1	1
7119816|F|0-16:G>C-16:G>C	TGCAGAAGGAATTGGTGGATGTCAATGAGAAAGCTGAAGTCACAGCCAATGAACTAACGGAAGAGAGAG	TGCAGAAGGAATTGGTGGATGTCAATGAGAAAGCTGAAGTCACAGCCAATGAACTAACGGAAGAGAGAG	scaffold02581	41033	1	4.73568e-29	Chromosome11	4340366	1	5.18104e-29	16:G>C	16	1	0.978723	0.12766	0.87234	0.021277	0.106383	0.041648	0.222725	0.132187	22.4741	13.6154	1	0	0	0	0	0	0	0	0	0	0	0	0	0	0	0	0	2	0	0	0	0	0	0	0	0
7106915|F|0-7:G>A-7:G>A	TGCAGAAGGACAAAAGTGTTGAATCGTGGTGGGAACTTGGTGATAAAGAAAAAAGTAAGATGGTTTCAG	TGCAGAAGGACAAAAGTGTTGAATCGTGGTGGGAACTTGGTGATAAAGAAAAAAGTAAGATGGTTTCAG	scaffold07520	864268	1	4.73568e-29	Chromosome01	24502454	1	5.18104e-29	7:G>A	7	1	1	0.095745	0.904255	0	0.095745	0	0.173155	0.086578	24.661	14.1818	1	0	2	0	0	0	0	0	0	0	0	0	0	0	0	0	0	0	2	0	0	0	0	0	0	0
13855396|F|0-30:T>C-30:T>C	TGCAGAAGGAGACAACCGTGGCTTAGCACTTTTGCTTCCCATAATACCAGCCATAGGTTGGGTACTGTT	TGCAGAAGGAGACAACCGTGGCTTAGCACTTTTGCTTCCCATAATACCAGCCATAGGTTGGGTACTGTT	scaffold04175	435936	1	4.73568e-29	Chromosome12	1443116	1	5.18104e-29	30:T>C	30	0.978723	0.967391	0.423913	0.576087	0.032609	0.391304	0.063091	0.488422	0.275756	6.6036	4.5283	1	2	0	2	0	0	2	0	2	0	2	0	0	1	0	2	2	0	2	2	2	2	0	1	2	0
7109776|F|0-19:T>A-19:T>A	TGCAGAAGGAGAGAAGATATTTGGGAGAAAAAGCCACCTTAGCTCTACGACAAATGGCCAAGTAAATTT	TGCAGAAGGAGAGAAGATATTTGGGAGAAAAAGCCACCTTAGCTCTACGACAAATGGCCAAGTAAATTT	scaffold10045	179253	1	2.2033e-27	Chromosome11	24295795	1	2.4105e-27	19:T>A	19	0.989362	0.967742	0.096774	0.903226	0.032258	0.064516	0.062435	0.174818	0.118626	10.9203	6.09091	1	0	1	0	0	0	0	0	0	0	0	2	0	0	0	0	0	0	0	0	0	0	0	0	0	0
7111592|F|0-64:A>T-64:A>T	TGCAGAAGGAGGCGGCAGACTCTTCAGTGTCTCGTTCACACTTTCCAGAATCGTCGTCGATCCCAGCGA	TGCAGAAGGAGGCGGCAGACTCTTCAGTGTCTCGTTCACACTTTCCAGAATCGTCGTCGATCCCAGCGA	scaffold02912	81389	1	4.73568e-29	Chromosome03	26973868	1	5.18104e-29	64:A>T	64	0.989362	1	0.053763	0.946237	0	0.053763	0	0.101746	0.050873	6.51724	3.8	1	0	0	0	0	0	0	0	0	0	0	0	0	0	0	0	0	0	0	0	0	0	0	0	0	0
7111593|F|0-51:T>C-51:T>C	TGCAGAAGGATCACAGTGACACCAACAAGCTAAATTTTGATTCTCTTTGCTTGAAATTTCTTGGGATTG	TGCAGAAGGATCACAGTGACACCAACAAGCTAAATTTTGATTCTCTTTGCTTGAAATTTCTTGGGATTG	scaffold07430	28341	1	4.73568e-29	Chromosome15	7871125	1	5.18104e-29	51:T>C	51	1	1	0.148936	0.851064	0	0.148936	0	0.253508	0.126754	17.4746	9.83333	1	2	0	0	2	2	0	0	0	0	0	0	0	0	0	0	0	2	0	0	0	0	0	0	0	0
7120959|F|0-5:G>A-5:G>A	TGCAGGAGGATGTGAAACTCATGGTGGAAACTGGGTTAGATGCTTATAGATTATCAATGTAAACATTTT	TGCAGGAGGATGTGAAACTCATGGTGGAAACTGGGTTAGATGCTTATAGATTATCAATGTAAACATTTT	scaffold04457	482190	1	2.2033e-27	Chromosome01	30661293	1	2.4105e-27	5:G>A	5	1	0.755319	0.680851	0.319149	0.244681	0.43617	0.369624	0.434586	0.402105	34.4886	32.7564	1	0	1	1	1	0	2	1	2	1	2	0	0	0	0	2	2	0	0	2	0	1	0	2	1	1
7111595|F|0-43:T>C-43:T>C	TGCAGAAGGATTTGCTGCACTTCTTTAGAAATAGAAGACAAGATATTATCTTGTTTTGTTACAGATCGG	TGCAGAAGGATTTGCTGCACTTCTTTAGAAATAGAAGACAAGATATTATCTTGTTTTGTTAC	scaffold09460	338290	1	1.14525e-24	Chromosome11	20001762	1	1.25293e-24	43:T>C	43	1	0.968085	0.574468	0.425532	0.031915	0.542553	0.061793	0.488909	0.275351	15.8772	11.4848	1	1	0	2	0	2	2	0	2	0	2	0	0	2	0	2	2	2	0	2	2	0	0	0	0	0
7111596|F|0-48:A>G-48:A>G	TGCAGAAGGATTTTGTCTGGCAAAGTTTGTGTTTATCTGATTTTACAAATGCCTAAATATTGCAAGACT	TGCAGAAGGATTTTGTCTGGCAAAGTTTGTGTTTATCTGATTTTACAAATGCCTAAATATTGCAAGACT	scaffold06028	108023	1	4.73568e-29	Chromosome17	24659774	1	5.18104e-29	48:A>G	48	1	1	0.085106	0.914894	0	0.085106	0	0.155727	0.077863	17.2627	7.72727	1	0	0	0	2	0	0	0	0	2	0	0	0	0	0	0	0	0	0	0	0	0	2	0	0	0
7119817|F|0-60:A>C-60:A>C	TGCAGAAGGCAATGCCCACAGAGGCATGTGCTCAACGGACAACAAAGACTTTGCCTGTCCAATCTGTTC	TGCAGAAGGCAATGCCCACAGAGGCATGTGCTCAACGGACAACAAAGACTTTGCCTGTCCAATCTGTTC	scaffold06548	143072	1	4.73568e-29	Chromosome16	4014072	1	5.18104e-29	60:A>C	60	1	0.989362	0.37234	0.62766	0.010638	0.361702	0.02105	0.467406	0.244228	17.8633	10.3954	1	0	2	0	0	2	0	2	0	0	0	0	0	0	2	0	0	0	2	2	0	0	2	0	2	0
7111597|F|0-43:T>G-43:T>G	TGCAGAAGGCACAGTTGGCTGCACAAGGATAGAAACATTGATCTATAGCTCAAAAAAAGGTACTAAAGA	TGCAGAAGGCACAGTTGGCTGCACAAGGATAGAAACATTGATCTATAGCTCAAAAAAAGGTACTAAAGA	scaffold03750	1127759	1	2.2033e-27	Chromosome11	25770142	1	2.4105e-27	43:T>G	43	1	0.702128	0.87234	0.12766	0.297872	0.574468	0.418289	0.222725	0.320507	11.3374	12.1569	1	0	1	2	2	1	2	1	2	0	2	2	2	0	1	2	2	1	1	0	2	2	1	2	2	1
7111599|F|0-29:T>C-29:T>C	TGCAGAAGGCATCAGCCCATTATCCAGGCTGGAACAAGTATCACCATCAACAAAAATTTCATGGGTCCT	TGCAGAAGGCATCAGCCCATTATCCAGGCTGGAACAAGTATCACCATCAACAAAAATTTCATGGGTCCT	scaffold07005	58333	1	2.2033e-27	Chromosome12	2800146	1	5.18104e-29	29:T>C	29	1	0.925532	0.712766	0.287234	0.074468	0.638298	0.137845	0.409461	0.273653	13.8889	11.253	1	0	2	2	2	0	2	2	2	2	2	0	1	2	1	0	2	0	0	2	0	0	2	2	1	0
7111601|F|0-49:T>C-49:T>C	TGCAGAAGGCCACCGCTGAGAAAAAAACAAGTTGTCGTTGGATTGTGATTGGTCTTATCTGGATTTTGA	TGCAGAAGGCCACCGCTGAGAAAAAAACAAGTTGTCGTTGGATTGTGATTGGTCTTATCTGGATTTTGA	scaffold01127	286831	1	4.73568e-29	Chromosome06	23963690	1	5.18104e-29	49:T>C	49	0.989362	0.903226	0.731183	0.268817	0.096774	0.634409	0.174818	0.393109	0.283963	25.2264	20.8571	1	2	0	2	0	2	2	0	2	0	2	2	0	1	2	2	2	2	2	0	1	2	0	2	0	0
15484457|F|0-28:G>T-28:G>T	TGCAGAAGGCGACGGCTGATGCCTGGAAGTTGCGTCTCTGTGAGCTCACTCGAGAAACCATCGAGAATG	TGCAGAAGGCGACGGCTGATGCCTGGAAGTTGCGTCTCTGTGAGCTCACTCGAGAAACCATCGAGAATG	scaffold10305	35576	1	4.73568e-29	Chromosome08	28020250	1	5.18104e-29	28:G>T	28	1	0.691489	0.840426	0.159574	0.308511	0.531915	0.426664	0.268221	0.347442	21.7927	21.7172	1	2	1	0	2	1	2	0	2	0	2	2	2	1	2	2	2	2	1	1	2	1	0	1	2	1
13858612|F|0-65:C>G-65:C>G	TGCAGAAGGCGAGTTTCGTTCCAATGTGCAAAGGAAAGAAACATCTGATTTATATCAATCTTTATCCGA	TGCAGAAGGCGAGTTTCGTTCCAATGTGCAAAGGAAAGAAACATCTGATTTATATCAATCTTTATCCGA	scaffold08686	78519	1	4.73568e-29	Chromosome14	12732763	1	5.18104e-29	65:C>G	65	0.989362	0.989247	0.053763	0.946237	0.010753	0.043011	0.021274	0.101746	0.06151	13.7241	8.28571	1	2	0	0	0	0	0	0	0	0	0	0	0	0	2	0	0	0	0	0	0	0	0	0	0	0
13858613|F|0-9:C>T-9:C>T	TGCAGAAGGCGCAGAAGGATGCCAAAAACGCTACTGCTGTAAGGATTACACCATGCTACCCAGCTTGAG	TGCAGAAGGCGCAGAAGGATGCCAAAAACGCTACTGCTGTAAGGATTACACCATGCTACCCAGCTTGAG	scaffold07595	258747	1	4.73568e-29	Chromosome18	9869348	1	5.18104e-29	9:C>T	9	1	0.989362	0.521277	0.478723	0.010638	0.510638	0.02105	0.499095	0.260072	13.7094	10.8689	1	0	0	0	0	2	2	0	2	2	2	2	2	2	0	0	2	0	0	2	2	0	0	2	0	0
20476807|F|0-12:C>T-12:C>T	TGCAGAAGGCTACTCAGCAGATGCAGATTAGGCCATTGTTTCGTTCTTACATGGCCATTATGGATGAGT	TGCAGAAGGCTACTCAGCAGATGCAGATTAGGCCATTGTTTCGTTCTTACATGGCCATTATGGATGAGT	scaffold04094	64230	1	4.73568e-29	Chromosome08	6913404	1	5.18104e-29	12:C>T	12	0.968085	0.989011	0.032967	0.967033	0.010989	0.021978	0.021737	0.06376	0.042748	3.54545	4.33333	1	0	0	0	0	0	0	0	0	0	0	0	0	0	0	0	0	0	0	0	0	0	0	0	0	0
7107028|F|0-28:C>G-28:C>G	TGCAGAAGGCTCAAATTTGAATCTAACTCTATCTTCTCTATAGGTGGCTTTTACACTAATTTTTGATCC	TGCAGAAGGCTCAAATTTGAATCTAACTCTATCTTCTCTATAGGTGGCTTTTACACTAATTTTTGATCC	scaffold05280	136836	1	2.2033e-27	Chromosome11	23749394	1	2.4105e-27	28:C>G	28	1	0.606383	0.946809	0.053191	0.393617	0.553191	0.477365	0.100724	0.289045	12.0429	15.7946	1	2	1	2	2	1	2	1	2	1	2	1	2	2	1	2	2	1	1	0	2	1	1	1	2	1
7143137|F|0-10:G>A-10:G>A	TGCAGAAGGGGCAATGGGTGACATTTCACTTATTATATTACAGAATGAATACAGCATTTCACATTTCAT	TGCAGAAGGGGCAATGGGTGACATTTCACTTATTATATTACAGAATGAATACAGCATTTCACATTTCAT	scaffold03614	1785908	1	4.73568e-29	Chromosome09	25853088	1	5.18104e-29	10:G>A	10	1	0.861702	0.62766	0.37234	0.138298	0.489362	0.238343	0.467406	0.352875	10.5743	10.3194	1	0	0	2	2	1	2	0	2	0	2	0	0	0	0	0	2	2	2	1	1	2	1	0	0	0
7119818|F|0-30:T>A-30:T>A	TGCAGAAGGGCCAAGGAATTAGAATATGTATATCAATCGAGGCAAAACGTGAGTTCAAAACATACCATC	TGCAGAAGGGCCAAGGAATTAGAATATGTATATCAATCGAGGCAAAACGTGAGTTCAAAACATACCATC	scaffold09761	782945	1	2.2033e-27	Chromosome09	81083	1	2.4105e-27	30:T>A	30	0.978723	0.98913	0.326087	0.673913	0.01087	0.315217	0.021503	0.439509	0.230506	16.2956	11.6	1	0	2	0	0	2	0	0	0	0	0	2	0	0	0	0	0	0	2	0	0	0	2	0	0	2
7143139|F|0-32:T>G-32:T>G	TGCAGAAGGGCTTGCAGCAATTTTATTTTTTTTATTTTACTCTGTGGTCTTTTCTTGTGTCAAAAGCTA	TGCAGAAGGGCTTGCAGCAATTTTATTTTTTTTATTTTACTCTGTGGTCTTTTCTTGTGTCAAAAGCTA	scaffold04457	1059956	1	4.73568e-29	Chromosome01	30107478	1	5.18104e-29	32:T>G	32	1	0.840426	0.297872	0.702128	0.159574	0.138298	0.268221	0.418289	0.343255	7.41667	6.45455	1	0	0	0	1	0	0	0	0	1	0	0	1	0	0	0	0	0	0	0	0	1	0	0	1	2
7127050|F|0-57:A>T-57:A>T	TGCAGAAGGGTCAGGAGTTACTGTTGAGGGATTTGCTCCTATCACGGAGGAGGCGATAGCAACTCCTCC	TGCAGAAGGGTCAGGAGTTACTGTTGAGGGATTTGCTCCTATCACGGAGGAGGCGATAGCAACTCCTCC	scaffold09876	193985	1	2.2033e-27	Chromosome14	4096442	1	5.18104e-29	57:A>T	57	0.968085	1	0.131868	0.868132	0	0.131868	0	0.228958	0.114479	5.73913	3.91667	1	0	0	0	0	0	0	0	0	0	0	0	0	0	0	0	0	0	0	0	0	0	0	0	0	0
7149336|F|0-26:T>A-26:T>A	TGCAGAAGGGTTCCAAGCTCTTCTGGTAAAGAACCTATGAAGTTGTTGTGGCTGAGATCAAGTCGTTGA	TGCAGAAGGGTTCCAAGCTCTTCTGGTAAAGAACCTATGAAGTTGTTGTGGCTGAGATCAAGTCGTTGA	scaffold06980	100455	1	4.73568e-29	Chromosome03	24991851	1	5.18104e-29	26:T>A	26	1	0.989362	0.223404	0.776596	0.010638	0.212766	0.02105	0.34699	0.18402	8.62393	4.64286	1	0	0	0	2	0	0	2	0	0	0	0	2	0	2	0	0	2	0	0	0	2	0	2	0	0
13858617|F|0-34:G>T-34:G>T	TGCAGAAGGTCAGCCTGTCACATTCAGTCAAGTTGTGCTTGAAGTCATGAGGCATCTTGAAGGAGCCTA	TGCAGAAGGTCAGCCTGTCACATTCAGTCAAGTTGTGCTTGAAGTCATGAGGCATCTTGAAGGAGCCTA	scaffold06711	160746	1	2.2033e-27	Chromosome12	478409	1	2.4105e-27	34:G>T	34	1	1	0.095745	0.904255	0	0.095745	0	0.173155	0.086578	26.5254	11	1	0	0	0	0	0	0	0	0	0	0	0	2	0	0	0	0	0	0	0	0	0	0	0	0	0
20471309|F|0-13:G>A-13:G>A	TGCAGAAGGTGCGGGTAAGGATCTAATTATATAATCTTTTAGGGGATGTGGCATGCATCAATTTTAGAC	TGCAGAAGGTGCGGGTAAGGATCTAATTATATAATCTTTTAGGGGATGTGGCATGCATCAATTTTAGAC	scaffold10563	609693	1	4.73568e-29	Chromosome03	25967351	1	5.18104e-29	13:G>A	13	0.840426	0.974684	0.037975	0.962025	0.025316	0.012658	0.049351	0.073065	0.061208	4.12766	2.66667	1	0	0	0	0	-	0	0	0	0	0	-	0	-	0	0	0	0	-	0	0	0	0	0	0	0
7111616|F|0-29:C>A-29:C>A	TGCAGAAGGTGTACCGCAGTTATCGCACCCGGCGCAGGTTAGCCGACTCCGCAGTGGTGGTGGAAGAGC	TGCAGAAGGTGTACCGCAGTTATCGCACCCGGCGCAGGTTAGCCGACTCCGCAGTGGTGGTGGAAGAGC	scaffold06550	541486	1	2.2033e-27	Chromosome08	2181503	1	2.4105e-27	29:C>A	29	0.989362	0.956989	0.376344	0.623656	0.043011	0.333333	0.082322	0.469418	0.27587	11.9375	4.35714	1	0	2	0	2	0	0	2	0	2	0	0	0	0	2	0	0	0	0	0	0	0	2	0	1	0
7109783|F|0-38:G>C-38:G>C	TGCAGAAGGTTGATAACATAGACTTTGGTAGAGAACAGGTTCATGTCTATGCGGAGGACACTGATGTTG	TGCAGAAGGTTGATAACATAGACTTTGGTAGAGAACAGGTTCATGTCTATGCGGAGGACACTGATGTTG	scaffold01441	109838	1	4.73568e-29	Chromosome05	27962457	1	5.18104e-29	38:G>C	38	0.989362	0.956989	0.333333	0.666667	0.043011	0.290323	0.082322	0.444444	0.263383	13.2613	9.2619	1	1	0	1	2	0	0	2	0	2	0	2	2	0	2	2	0	0	0	0	2	2	0	0	0	0
13855402|F|0-28:G>A-28:G>A	TGCAGAAGGTTTGAAGGGAACTCCTTTGGAGGTCCAATACCACCAACACTGTCCAACCTAACTTCTTTG	TGCAGAAGGTTTGAAGGGAACTCCTTTGGAGGTCCAATACCACCAACACTGTCCAACCTAACTTCTTTG	scaffold03115	89545	2	4.73568e-29	Chromosome06	27371555	2	5.18104e-29	28:G>A	28	1	0.978723	0.265957	0.734043	0.021277	0.244681	0.041648	0.390448	0.216048	7.93913	3.9697	1	0	0	0	0	0	0	2	0	2	0	0	0	0	2	2	0	0	1	0	2	2	2	0	0	0
15484458|F|0-58:T>C-58:T>C	TGCAGAAGGTTTGGATCTCAGTCTTTCGACGATCCAATAGCCTTATTTGCTTGCATTTTGAGTCTAAAT	TGCAGAAGGTTTGGATCTCAGTCTTTCGACGATCCAATAGCCTTATTTGCTTGCATTTTGAGTCTAAAT	scaffold09501	503402	1	4.73568e-29	Chromosome03	2031531	1	5.18104e-29	58:T>C	58	1	1	0.042553	0.957447	0	0.042553	0	0.081485	0.040742	11.2542	4.2	1	0	0	0	0	0	0	0	0	0	0	2	0	0	0	0	0	0	0	0	0	0	0	0	0	0
20484833|F|0-28:C>T-28:C>T	TGCAGAAGTAAAATTGTGTTTTTGAGATCCAAGCATCATCATCAACAAGTGCCACAAAAGAAACTGCTT	TGCAGAAGTAAAATTGTGTTTTTGAGATCCAAGCATCATCATCAACAAGTGCCACAAAAGAAACTGCTT	scaffold03245	158904	1	4.73568e-29	Chromosome17	24828291	1	5.18104e-29	28:C>T	28	1	0.989362	0.031915	0.968085	0.010638	0.021277	0.02105	0.061793	0.041421	6.67521	4.5	1	0	0	0	0	0	0	0	0	0	0	0	0	0	0	0	0	2	0	0	0	0	0	0	0	0
7107033|F|0-22:G>T-22:G>T	TGCAGAAGTACCATAGAGATGTGTTAGAGCACATGGCTCCTCCTCCTCCTTGGGCTCTATATCCACCAC	TGCAGAAGTACCATAGAGATGTGTTAGAGCACATGGCTCCTCCTCCTCCTTGGGCTCTATATCCACCAC	scaffold04851	74871	1	4.73568e-29	Chromosome17	18304695	1	5.18104e-29	22:G>T	22	0.978723	0.934783	0.271739	0.728261	0.065217	0.206522	0.121928	0.395794	0.258861	11.3208	9.40625	1	0	0	0	0	0	0	0	0	1	0	0	0	0	2	1	0	-	2	1	0	2	0	0	2	2
34220248|F|0-64:A>C-64:A>C	TGCAGAAGTACTTGAAGTTATACATATCTGGCATGCAACAGAATTAGAAATGGAAAGAAGTCATAAAAT	TGCAGAAGTACTTGAAGTTATACATATCTGGCATGCAACAGAATTAGAAATGGAAAGAAGTCATAAAAT	scaffold11287	45362	1	2.2033e-27	Chromosome09	2500248	1	2.4105e-27	64:A>C	64	0.946809	0.955056	0.089888	0.910112	0.044944	0.044944	0.085848	0.163616	0.124732	3.07619	2.5	1	0	0	0	0	0	0	0	0	0	0	0	0	0	0	0	0	0	0	0	0	0	0	0	0	0
7111624|F|0-57:A>G-57:A>G	TGCAGAAGTATGGGTAAGGTGTGGAGTTGCAAAATTTCTCCGGTGTGCCAGAAACTGAGGTGAAAAAGC	TGCAGAAGTATGGGTAAGGTGTGGAGTTGCAAAATTTCTCCGGTGTGCCAGAAACTGAGGTGAAAAAGC	scaffold10305	45948	1	2.2033e-27	Chromosome08	28009868	1	2.4105e-27	57:A>G	57	0.978723	0.5	0.706522	0.293478	0.5	0.206522	0.5	0.414698	0.457349	7.91228	5.8375	1	1	0	0	0	1	1	0	1	0	1	1	2	1	0	0	1	1	1	1	1	2	0	1	0	0
7119824|F|0-15:T>A-15:T>A	TGCAGAAGTATTCCCTCTGAAGCTGGAGAACATGGAAAACGAAACCCGCATCTTGGTGGAGATCTAGTT	TGCAGAAGTATTCCCTCTGAAGCTGGAGAACATGGAAAACGAAACCCGCATCTTGGTGGAGATCTAGTT	scaffold02431	145737	1	1.71535e-23	Chromosome08	31741482	1	1.87666e-23	15:T>A	15	1	1	0.042553	0.957447	0	0.042553	0	0.081485	0.040742	23.8136	12	1	0	0	0	0	0	0	0	0	0	0	0	0	0	0	2	0	0	0	0	0	0	0	0	0	0
7111626|F|0-14:C>A-14:C>A	TGCAGAAGTATTTGCAGTTTTAGACCATGATTTTATGGTTATGCCCATTATCTCAATTAGAAAAGAGAA	TGCAGAAGTATTTGCAGTTTTAGACCATGATTTTATGGTTATGCCCATTATCTCAATTAGAAAAGAGAA	scaffold04193	45095	1	4.73568e-29	Chromosome05	18741870	1	5.18104e-29	14:C>A	14	1	0.978723	0.659574	0.340426	0.021277	0.638298	0.041648	0.449072	0.24536	17.4914	13.0366	1	2	0	2	2	0	2	2	2	2	2	2	0	2	2	2	2	2	0	2	2	2	2	2	2	2
20493108|F|0-43:C>T-43:C>T	TGCAGAAGTATTTTTGCTACCATTAGAGTCATATGATTTGATTCTGGAAATCCAGTGGTTACAGATCGG	TGCAGAAGTATTTTTGCTACCATTAGAGTCATATGATTTGATTCTGGAAATCCAGTGGTTAC	scaffold09013	65500	1	1.14525e-24	Chromosome08	16945360	1	1.25293e-24	43:C>T	43	1	0.989362	0.074468	0.925532	0.010638	0.06383	0.02105	0.137845	0.079448	12.4786	7.66667	1	0	0	0	0	0	0	0	0	0	0	0	0	0	0	0	0	0	0	0	0	0	2	2	0	0
7109785|F|0-20:A>G-20:A>G	TGCAGAAGTCAAGACCAGATAGCAAATATCATGACAAAACCACTCAAGCAAGTTGTATTTGTGAAGCTT	TGCAGAAGTCAAGACCAGATAGCAAATATCATGACAAAACCACTCAAGCAAGTTGTATTTGTGAAGCTT	scaffold12946	333012	1	4.73568e-29	Chromosome01	18287584	1	5.18104e-29	20:A>G	20	1	0.946809	0.117021	0.882979	0.053191	0.06383	0.100724	0.206655	0.153689	22	16.2941	1	2	0	0	1	0	0	0	0	2	0	0	0	0	0	1	0	0	0	0	0	2	0	0	1	0
13855405|F|0-57:A>G-57:A>G	TGCAGAAGTCGCCAGCTTCACTCCTGCTGATCAGATTCTTATCAGTTGTGGCGCTAAAAGCTTGTCAGC	TGCAGAAGTCGCCAGCTTCACTCCTGCTGATCAGATTCTTATCAGTTGTGGCGCTAAAAGCTTGTCAGC	scaffold02994	531851	1	4.73568e-29	Chromosome04	22437801	1	5.18104e-29	57:A>G	57	1	1	0.223404	0.776596	0	0.223404	0	0.34699	0.173495	18.8814	9.33333	1	0	0	0	0	0	0	2	0	2	0	0	0	0	2	0	0	0	0	0	0	2	2	0	2	0
7111631|F|0-39:T>C-39:T>C	TGCAGAAGTCGTAATGGGTTGTTAGATTTCTCTTTCACGTGTTTCTCTAATACTGCCAGTCCATATCAA	TGCAGAAGTCGTAATGGGTTGTTAGATTTCTCTTTCACGTGTTTCTCTAATACTGCCAGTCCATATCAA	scaffold00847	187329	1	2.2033e-27	Chromosome16	26183208	1	2.4105e-27	39:T>C	39	1	0.989362	0.053191	0.946809	0.010638	0.042553	0.02105	0.100724	0.060887	10.8718	3.8	1	0	0	0	0	0	0	0	0	0	0	0	0	0	0	0	0	0	0	0	0	0	0	0	0	0
20471328|F|0-29:A>G-29:A>G	TGCAGAAGTCTTCTCATCACATCAAGCACAGTAGTTTTACGTATCACATTAGCCTGCCAAAAGATAATT	TGCAGAAGTCTTCTCATCACATCAAGCACAGTAGTTTTACGTATCACATTAGCCTGCCAAAAGATAATT	scaffold02658	429245	2	4.73568e-29	Chromosome01	32612069	2	5.18104e-29	29:A>G	29	1	0.989362	0.074468	0.925532	0.010638	0.06383	0.02105	0.137845	0.079448	4.75862	3.42857	1	0	0	0	0	0	0	0	0	0	0	0	0	0	0	0	0	0	0	0	0	0	0	0	0	0
7119825|F|0-47:C>T-47:C>T	TGCAGAAGTCTTGATCTAGAATACGGATAGTTACAATTAGGGGTGAGCATTCGGTCGGTTCAGTTTACA	TGCAGAAGTCTTGATCTAGAATACGGATAGTTACAATTAGGGGTGAGCATTCGGTCGGTTCAGTTTACA	scaffold03241	124213	1	6.12599e-28	Chromosome15	5105155	1	6.7021e-28	47:C>T	47	0.946809	0.910112	0.494382	0.505618	0.089888	0.404494	0.163616	0.499937	0.331776	9.74757	9.46296	1	2	0	0	0	2	2	0	2	2	-	0	2	2	0	0	2	1	0	0	0	0	2	0	0	0
7111632|F|0-64:G>A-64:G>A	TGCAGAAGTGAAAAAACGAGCTAAAAAAATTTTCTTCACCTCCTTATTTATACATCATTTTGAGGGCAT	TGCAGAAGTGAAAAAACGAGCTAAAAAAATTTTCTTCACCTCCTTATTTATACATCATTTTGAGGGCAT	scaffold04797	41472	1	2.2033e-27	Chromosome08	5750040	1	5.18104e-29	64:G>A	64	0.946809	0.977528	0.134831	0.865169	0.022472	0.11236	0.043934	0.233304	0.138619	10.1081	6.46154	1	0	0	0	0	0	0	0	0	0	0	0	0	0	0	0	0	0	0	2	0	0	0	0	0	0
13855406|F|0-21:G>A-21:G>A	TGCAGAAGTGAAAACGGAGAAGAGGAGAGGACGGGAGAGGTGCGGAGCGGTCAGGTCAACTATAAGACT	TGCAGAAGTGAAAACGGAGAAGAGGAGAGGACGGGAGAGGTGCGGAGCGGTCAGGTCAACTATAAGACT	scaffold10173	441881	1	4.83727e-14	Chromosome15	10753431	1	5.29218e-14	21:G>A	21	0.87234	0.902439	0.182927	0.817073	0.097561	0.085366	0.176086	0.298929	0.237507	9.16304	6.94444	1	1	-	0	0	1	0	0	0	0	0	0	0	0	-	0	0	0	0	-	1	0	0	0	0	0
7111633|F|0-56:T>C-56:T>C	TGCAGAAGTGAAATGGAGTTGTTGGTGGGTGTGAGTGGTTGGCAAAGAAAGCTACATACTAGCTTGCAG	TGCAGAAGTGAAATGGAGTTGTTGGTGGGTGTGAGTGGTTGGCAAAGAAAGCTACATACTAGCTTGCAG	scaffold02960	680945	1	4.73568e-29	Chromosome08	534868	1	5.18104e-29	56:T>C	56	0.914894	0.906977	0.267442	0.732558	0.093023	0.174419	0.16874	0.391833	0.280287	8.20619	7.8	1	0	2	0	2	2	0	0	0	0	0	2	0	-	-	0	0	0	2	0	-	0	1	0	1	0
7119826|F|0-66:G>A-66:G>A	TGCAGAAGTGAAGACCTATGAGAGGAACCGAGGGTAAATAATAGCGATATTAGGTTGAATATGCAAGTA	TGCAGAAGTGAAGACCTATGAGAGGAACCGAGGGTAAATAATAGCGATATTAGGTTGAATATGCAAGTA	scaffold09601	12294	1	2.2033e-27	Chromosome15	22387295	1	2.4105e-27	66:G>A	66	1	1	0.404255	0.595745	0	0.404255	0	0.481666	0.240833	34.2119	17.6667	1	0	0	2	0	2	0	2	0	2	0	0	2	2	2	0	0	0	2	2	0	2	0	0	0	0
7119798|F|0-8:T>A-8:T>A	TGCAGAAGTGACCAACACTATACAAAACCATAAGTAATTCTCCTGCCTAGAATAAGTTAGCCTCGCGCC	TGCAGAAGTGACCAACACTATACAAAACCATAAGTAATTCTCCTGCCTAGAATAAGTTAGCCTCGCGCC	scaffold01551	489802	1	2.2033e-27	Chromosome15	3243764	1	2.4105e-27	8:T>A	8	1	0.989362	0.202128	0.797872	0.010638	0.191489	0.02105	0.322544	0.171797	20.8889	12.4545	1	2	2	0	0	0	0	0	0	2	0	0	0	0	0	0	0	0	0	0	0	0	0	0	0	2
7111635|F|0-63:C>A-63:C>A	TGCAGAAGTGACCGAGGGATGGAAAAATGAGCGTGCAGTTGATGACCCTGAAGAGGTGGTTGCCATGGT	TGCAGAAGTGACCGAGGGATGGAAAAATGAGCGTGCAGTTGATGACCCTGAAGAGGTGGTTGCCATGGT	scaffold01551	93803	1	4.73568e-29	Chromosome15	3652561	1	5.18104e-29	63:C>A	63	1	0.638298	0.787234	0.212766	0.361702	0.425532	0.461747	0.334993	0.39837	6.01333	6.7234	1	2	1	1	2	2	1	2	1	2	1	2	1	1	0	0	1	2	0	2	2	2	0	1	2	0
13855409|F|0-55:T>C-55:T>C	TGCAGAAGTGCAAGATGATTTGAATATTATTCCAGATACTGACAAATAAATCAACTCAATTTTATCAAT	TGCAGAAGTGCAAGATGATTTGAATATTATTCCAGATACTGACAAATAAATCAACTCAATTTTATCAAT	scaffold03581	1159258	1	4.73568e-29	Chromosome05	2194125	1	5.18104e-29	55:T>C	55	0.989362	0.290323	0.956989	0.043011	0.709677	0.247312	0.412071	0.082322	0.247196	16.7647	19.5405	1	0	1	1	1	2	1	2	1	1	1	2	1	1	2	1	1	2	1	1	1	0	1	1	1	1
7107037|F|0-41:A>C-41:A>C	TGCAGAAGTGCATAAATGATGAAACTGTGTAAGAGTGTGTTAGAATATGCATCTTTTATTGTTGCAAAA	TGCAGAAGTGCATAAATGATGAAACTGTGTAAGAGTGTGTTAGAATATGCATCTTTTATTGTTGCAAAA	scaffold05618	61112	1	4.73568e-29	Chromosome06	2856271	1	5.18104e-29	41:A>C	41	1	0.978723	0.170213	0.829787	0.021277	0.148936	0.041648	0.282481	0.162064	27.7217	19.95	1	0	1	2	0	0	0	2	0	0	0	0	0	0	0	2	0	0	0	0	0	0	0	0	0	0
13858620|F|0-35:A>G-35:A>G	TGCAGAAGTGGCAGAAATATCCCCAAATGAAGATAACTGATTATATAGGCCACTCGGTGAAGGGTTTAG	TGCAGAAGTGGCAGAAATATCCCCAAATGAAGATAACTGATTATATAGGCCACTCGGTGAAGGGTTTAG	scaffold09466	6291	1	4.73568e-29	Chromosome13	22275219	1	5.18104e-29	35:A>G	35	1	0.946809	0.712766	0.287234	0.053191	0.659574	0.100724	0.409461	0.255093	9.23894	7.79762	1	2	0	2	2	0	2	2	2	2	2	0	0	2	0	2	2	0	0	2	2	2	2	2	2	0
13858621|F|0-33:C>G-33:C>G	TGCAGAAGTGGTATAGCTAATTCCATTTCTTCTCGCCGCATCAAAACATTAGCAATGGGTTGAGTTTAC	TGCAGAAGTGGTATAGCTAATTCCATTTCTTCTCGCCGCATCAAAACATTAGCAATGGGTTGAGTTTAC	scaffold11361	42380	1	4.73568e-29	Chromosome03	7890040	1	2.4105e-27	33:C>G	33	0.989362	0.989247	0.150538	0.849462	0.010753	0.139785	0.021274	0.255752	0.138513	19.5517	12.2353	1	0	0	0	0	2	0	0	0	0	0	0	2	0	0	2	0	0	0	0	0	0	0	0	0	2
13858623|F|0-33:T>A-33:T>A	TGCAGAAGTGTAGAAATACTACTGGAAAGTCTCTTGTTGGAAGAGGACCAGATGTTATTCCATCAAATA	TGCAGAAGTGTAGAAATACTACTGGAAAGTCTCTTGTTGGAAGAGGACCAGATGTTATTCCATCAAATA	scaffold11341	435604	1	4.73568e-29	Chromosome02	3450394	1	5.18104e-29	33:T>A	33	1	1	0.138298	0.861702	0	0.138298	0	0.238343	0.119172	43.5424	23.3529	1	0	0	2	0	0	0	2	0	0	0	0	0	0	2	0	0	0	0	0	0	2	0	0	0	0
7125534|F|0-50:T>A-50:T>A	TGCAGAAGTGTGTGCTCCCACTCTTTTGCTACCTCTTCATCAATTTCCCTTGAATCACCTGCTAACAAT	TGCAGAAGTGTGTGCTCCCACTCTTTTGCTACCTCTTCATCAATTTCCCTTGAATCACCTGCTAACAAT	scaffold03484	156570	2	4.73568e-29	Chromosome18	3523950	2	5.18104e-29	50:T>A	50	1	0.989362	0.085106	0.914894	0.010638	0.074468	0.02105	0.155727	0.088388	13.5641	6.7	1	0	0	0	0	0	0	0	0	0	0	0	0	0	0	2	0	0	2	0	0	0	0	0	0	2
7147015|F|0-6:A>G-6:A>G	TGCAGAAGTGTTTCTGGGGAGAAGGTTGGAGGAACCATCTTTTCTTCTATTATATCGACGCCAGAAGAA	TGCAGAAGTGTTTCTGGGGAGAAGGTTGGAGGAACCATCTTTTCTTCTATTATATCGACGCCAGAAGAA	scaffold03264	572156	1	4.73568e-29	Chromosome14	8615321	1	5.18104e-29	6:A>G	6	1	1	0.053191	0.946809	0	0.053191	0	0.100724	0.050362	8.27119	4.14286	1	0	0	0	2	0	0	0	0	0	0	0	0	0	0	0	0	0	0	0	0	0	0	0	2	0
7147016|F|0-33:C>T-33:C>T	TGCAGAAGTTAGCTAAGAGGCCAAGAGTCCTCTCGCTCATCTCCTCTGAAATAAAGAATTGGGAGAAGG	TGCAGAAGTTAGCTAAGAGGCCAAGAGTCCTCTCGCTCATCTCCTCTGAAATAAAGAATTGGGAGAAGG	scaffold04251	579453	2	4.73568e-29	Chromosome15	9225901	2	5.18104e-29	33:C>T	33	1	1	0.031915	0.968085	0	0.031915	0	0.061793	0.030896	12.9322	7.66667	1	0	0	0	0	0	0	0	0	0	0	0	0	0	0	0	0	0	0	0	0	0	0	0	0	0
20476816|F|0-24:A>G-24:A>G	TGCAGAAGTTATTCTAATTTGTATATTGGATATTCGCTTTTGCTTTCGCGTGGTCATCTCCATTTGCCC	TGCAGAAGTTATTCTAATTTGTATATTGGATATTCGCTTTTGCTTTCGCGTGGTCATCTCCATTTGCCC	scaffold04209	229992	1	4.73568e-29	Chromosome05	7832526	1	5.18104e-29	24:A>G	24	1	1	0.06383	0.93617	0	0.06383	0	0.119511	0.059756	9.83051	5.5	1	0	0	0	0	0	0	0	0	0	0	0	0	0	0	0	0	0	0	0	0	0	0	0	0	0
7111643|F|0-22:T>C-22:T>C	TGCAGAAGTTCTAAAATGTAAGTATGCAGAATAAAAAGAAACCTTCAACATTTGATACATAATATTTCC	TGCAGAAGTTCTAAAATGTAAGTATGCAGAATAAAAAGAAACCTTCAACATTTGATACATAATATTTCC	scaffold07760	20693	1	2.2033e-27	Chromosome12	28273590	1	2.4105e-27	22:T>C	22	1	0.93617	0.308511	0.691489	0.06383	0.244681	0.119511	0.426664	0.273087	21.1	12.2	1	0	2	0	1	0	0	2	0	1	0	0	0	0	0	0	0	0	2	0	0	0	2	0	0	2
7107041|F|0-56:C>T-56:C>T	TGCAGAAGTTGAAGGACAAAGCAGTTGAACTGAAGGTTGATGGTGATGTGCAATTCCATAAAAATGTGA	TGCAGAAGTTGAAGGACAAAGCAGTTGAACTGAAGGTTGATGGTGATGTGCAATTCCATAAAAATGTGA	scaffold00435	89183	1	2.2033e-27	Chromosome07	25662101	1	2.4105e-27	56:C>T	56	1	0.957447	0.148936	0.851064	0.042553	0.106383	0.081485	0.253508	0.167497	11.1491	7.82353	1	2	0	0	0	0	0	0	0	0	0	0	0	2	0	0	0	0	0	0	2	0	0	0	0	2
7107042|F|0-63:C>T-63:C>T	TGCAGAAGTTGAAGTTCTACAAACAGTGAAAGGAATTCAACAATTCTTCACATCGGAGAGGTTCGATCG	TGCAGAAGTTGAAGTTCTACAAACAGTGAAAGGAATTCAACAATTCTTCACATCGGAGAGGTTCGATCG	scaffold08799	815987	1	4.73568e-29	Chromosome17	23243562	1	5.18104e-29	63:C>T	63	1	1	0.031915	0.968085	0	0.031915	0	0.061793	0.030896	10.5932	4.33333	1	0	0	0	0	0	0	0	0	0	0	0	0	0	0	0	0	0	0	0	0	0	0	0	0	0
13855412|F|0-13:C>T-13:C>T	TGCAGAAGTTGAGCTATAAAGAAGAATAAGAAAACATGATTCAGGTGGATAAGTCAAGATACCCATTAT	TGCAGAAGTTGAGCTATAAAGAAGAATAAGAAAACATGATTCAGGTGGATAAGTCAAGATACCCATTAT		0	0	999	Chromosome09	14467230	1	2.4105e-27	13:C>T	13	1	0.989362	0.5	0.5	0.010638	0.489362	0.02105	0.5	0.260525	9.35043	5.91667	1	0	2	2	2	2	0	2	0	0	0	0	2	2	2	2	0	0	2	0	0	2	2	0	2	2
7111644|F|0-5:A>T-5:A>T	TGCAGAAGTTGATACTGAGGTTGCTCAAATAATAACATGGCCTTAGCAACAGGCATTAGGTTGAAAAAT	TGCAGAAGTTGATACTGAGGTTGCTCAAATAATAACATGGCCTTAGCAACAGGCATTAGGTTGAAAAAT	scaffold11495	732318	1	4.73568e-29	Chromosome01	28905640	1	5.18104e-29	5:A>T	5	1	0.542553	0.829787	0.170213	0.457447	0.37234	0.496378	0.282481	0.38943	10.7846	14.6429	1	1	2	0	2	2	1	0	1	1	1	1	0	1	0	2	1	1	2	2	1	2	2	2	2	1
7147022|F|0-32:T>G-32:T>G	TGCAGAAGTTGATACTGGTCTATGAGCTACGATGTTCTGGACTGCAAGAATTTATACGCCACAGGACTG	TGCAGAAGTTGATACTGGTCTATGAGCTACGATGTTCTGGACTGCAAGAATTTATACGCCACAGGACTG	scaffold11179	151293	1	4.73568e-29	Chromosome06	25524017	1	5.18104e-29	32:T>G	32	0.989362	0.989247	0.172043	0.827957	0.010753	0.16129	0.021274	0.284888	0.153081	6.85345	3.66667	1	2	0	0	0	0	0	0	0	0	0	0	0	0	0	0	0	0	0	2	0	0	0	0	0	0
7122615|F|0-32:G>T-32:G>T	TGCAGAAGTTGCCACCGGCCACCGGCAGCCTCGGTTCCGATCCAGTGACATGATATAAGGAGAAGGAAG	TGCAGAAGTTGCCACCGGCCACCGGCAGCCTCGGTTCCGATCCAGTGACATGATATAAGGAGAAGGAAG	scaffold07012	741824	1	4.73568e-29	Chromosome18	1322564	1	5.18104e-29	32:G>T	32	1	1	0.223404	0.776596	0	0.223404	0	0.34699	0.173495	22.7797	13.5926	1	0	2	0	2	0	0	0	0	2	0	0	2	0	0	0	0	0	0	2	2	0	0	0	0	0
7119836|F|0-25:T>C-25:T>C	TGCAGAAGTTGTGCCTATGAATCACTGAGGCTTGCGACCAAAACATCACATTTCTAATCAAACAGACAC	TGCAGAAGTTGTGCCTATGAATCACTGAGGCTTGCGACCAAAACATCACATTTCTAATCAAACAGACAC	scaffold00708	145243	1	2.2033e-27	Chromosome03	28873241	1	2.4105e-27	25:T>C	25	1	0.989362	0.457447	0.542553	0.010638	0.446809	0.02105	0.496378	0.258714	16.5	11.0196	1	0	2	0	0	0	2	0	2	0	2	0	0	0	0	0	2	1	0	2	0	0	0	0	2	0
7107043|F|0-28:C>A-28:C>A	TGCAGAAGTTGTTGACAATGCTCCCAAACACTTGGTATTCCTCTTCCCTCTGGAGTTTTGGTAACTTCT	TGCAGAAGTTGTTGACAATGCTCCCAAACACTTGGTATTCCTCTTCCCTCTGGAGTTTTGGTAACTTCT	scaffold06754	348535	1	4.73568e-29	Chromosome11	22775786	1	5.18104e-29	28:C>A	28	1	0.989362	0.202128	0.797872	0.010638	0.191489	0.02105	0.322544	0.171797	10.3879	4.5	1	0	0	0	2	0	0	2	0	1	0	0	0	0	0	0	0	0	0	0	0	2	0	0	2	0
7116997|F|0-40:G>A-40:G>A	TGCAGAAGTTTATGAAAATGGAGCCTTGGAAGATGTGGGTGTTGTTCATATTAGTCCTAGTGACAAAAG	TGCAGAAGTTTATGAAAATGGAGCCTTGGAAGATGTGGGTGTTGTTCATATTAGTCCTAGTGACAAAAG	scaffold00467	123723	1	4.73568e-29	Chromosome18	8833633	1	5.18104e-29	40:G>A	40	1	0.989362	0.680851	0.319149	0.010638	0.670213	0.02105	0.434586	0.227818	15.8707	12.2	1	2	2	2	0	0	2	2	2	2	2	0	0	2	2	2	2	1	0	2	2	0	2	0	0	0
7147029|F|0-63:C>A-63:C>A	TGCAGAAGTTTCAGGATCCCATGCATTTCCTTCCTGATGCTGAGACACTGAAGTTGGCGAATGCTGACC	TGCAGAAGTTTCAGGATCCCATGCATTTCCTTCCTGATGCTGAGACACTGAAGTTGGCGAATGCTGACC	scaffold02040	35738	1	4.73568e-29	Chromosome03	16411021	1	5.18104e-29	63:C>A	63	1	1	0.170213	0.829787	0	0.170213	0	0.282481	0.14124	11.2119	6.61905	1	0	0	0	0	0	0	2	0	0	0	0	0	0	0	2	0	0	0	0	0	2	2	2	0	0
7107044|F|0-53:T>G-53:T>G	TGCAGAAGTTTCTGCTTCAATTCAGTTGAATTTCCAATCACTAATTTGCCCATTCTTCTTACAGATCGG	TGCAGAAGTTTCTGCTTCAATTCAGTTGAATTTCCAATCACTAATTTGCCCATTCTTCTTAC	scaffold04285	179060	1	1.14525e-24	Chromosome08	28979483	1	1.25293e-24	53:T>G	53	1	1	0.095745	0.904255	0	0.095745	0	0.173155	0.086578	24.3051	10.8182	1	0	0	0	2	0	0	0	0	0	0	0	0	0	0	0	0	0	0	0	0	2	0	0	0	2
7111649|F|0-66:T>C-66:T>C	TGCAGAATAAAAGAAATTTGAGGGCATCCCCAATATTGCTTATTGTTTCTGGCATGCTACAAATACTAA	TGCAGAATAAAAGAAATTTGAGGGCATCCCCAATATTGCTTATTGTTTCTGGCATGCTACAAATACTAA	scaffold07087	163622	1	2.2033e-27	Chromosome09	2779836	1	2.4105e-27	66:T>C	66	1	0.93617	0.585106	0.414894	0.06383	0.521277	0.119511	0.485514	0.302512	10.2364	7.91045	1	2	0	0	0	0	2	0	2	0	2	2	0	2	0	0	2	2	0	2	1	0	2	1	0	2
20484876|F|0-61:C>G-61:C>G	TGCAGAATAAACAAATAGAAGGCATATTCTTTTTGTGGATGAACCTGTATCTAATTTATGCCTCTAGCT	TGCAGAATAAACAAATAGAAGGCATATTCTTTTTGTGGATGAACCTGTATCTAATTTATGCCTCTAGCT	scaffold04056	160338	1	4.73568e-29	Chromosome03	4807532	1	5.18104e-29	61:C>G	61	1	1	0.074468	0.925532	0	0.074468	0	0.137845	0.068923	24.8644	12.6667	1	0	0	0	0	0	0	2	0	0	0	0	0	0	0	0	0	0	0	0	0	0	2	0	0	0
7111653|F|0-65:T>C-65:T>C	TGCAGAATAAATTATTCCCGTTTATGCATAAACAAAAGAGAAAATGGACGGTAGGTAATAAATAATAAT	TGCAGAATAAATTATTCCCGTTTATGCATAAACAAAAGAGAAAATGGACGGTAGGTAATAAATAATAAT	scaffold06512	1011986	1	4.73568e-29	Chromosome02	7928465	1	5.18104e-29	65:T>C	65	1	1	0.095745	0.904255	0	0.095745	0	0.173155	0.086578	8.4661	5.75	1	0	0	0	2	0	0	0	0	2	0	0	0	0	0	0	0	0	0	0	0	2	0	0	2	0
7147035|F|0-24:C>T-24:C>T	TGCAGAATAACAACAATTTAGGACCAGAACAATACACCAATCAAACTCAGAACTATTTACAATTTCTTT	TGCAGAATAACAACAATTTAGGACCAGAACAATACACCAATCAAACTCAGAACTATTTACAATTTCTTT	scaffold01686	46698	1	4.73568e-29	Chromosome05	12355790	1	5.18104e-29	24:C>T	24	1	0.957447	0.382979	0.617021	0.042553	0.340426	0.081485	0.472612	0.277048	7.80531	5.73333	1	1	0	0	0	2	0	0	0	0	0	0	2	0	2	0	0	2	2	2	0	2	0	2	0	0
7143150|F|0-20:T>A-20:T>A	TGCAGAATAAGAACTATAGCTGCTCATTGAAAGTAAGATATATGAAAGACTCAAAACTTTGATCAAGTG	TGCAGAATAAGAACTATAGCTGCTCATTGAAAGTAAGATATATGAAAGACTCAAAACTTTGATCAAGTG	scaffold03741	219352	1	2.2033e-27	Chromosome15	7002761	1	2.4105e-27	20:T>A	20	0.989362	0.817204	0.569892	0.430108	0.182796	0.387097	0.298763	0.49023	0.394496	9.81522	8.95312	1	0	0	0	0	1	2	0	2	1	2	0	1	1	0	-	2	2	0	1	0	0	0	0	1	1
7147037|F|0-14:G>T-14:G>T	TGCAGAATAAGACTGGACTCACTTTGATCCATTTATAACACTTGACAGATCGCAAGTCTTGTTTTGTCT	TGCAGAATAAGACTGGACTCACTTTGATCCATTTATAACACTTGACAGATCGCAAGTCTTGTTTTGTCT	scaffold09876	9062	1	4.73568e-29	Chromosome14	4288427	1	5.18104e-29	14:G>T	14	1	1	0.095745	0.904255	0	0.095745	0	0.173155	0.086578	8.33898	5.1	1	0	0	0	0	0	0	0	0	0	0	0	0	0	0	0	0	0	0	0	0	0	0	2	0	2
7111656|F|0-5:A>G-5:A>G	TGCAGAATAATAACCAGGAGAAAAGCCTAATGGTTTTGAATGAAGAGCCTATAGCAACTAAAACTGAGA	TGCAGAATAATAACCAGGAGAAAAGCCTAATGGTTTTGAATGAAGAGCCTATAGCAACTAAAACTGAGA	scaffold04393	196981	1	4.73568e-29	Chromosome07	18821296	1	5.18104e-29	5:A>G	5	1	0.989362	0.265957	0.734043	0.010638	0.255319	0.02105	0.390448	0.205749	14.0085	9.3	1	0	0	0	2	2	0	0	0	0	0	0	0	0	0	0	0	0	0	0	0	0	2	2	2	2
20484882|F|0-14:C>A-14:C>A	TGCAGAATAATGTCCTAAAATTTATGTGGGAACTTGTAAGCTTCAAAACTTGTTTTTACCATTCCCTTT	TGCAGAATAATGTCCTAAAATTTATGTGGGAACTTGTAAGCTTCAAAACTTGTTTTTACCATTCCCTTT	scaffold02196	41946	1	4.73568e-29	Chromosome04	25117412	1	5.18104e-29	14:C>A	14	1	1	0.202128	0.797872	0	0.202128	0	0.322544	0.161272	14.7712	6.08333	1	0	0	0	0	2	0	2	0	0	0	0	0	0	2	0	0	0	0	0	0	0	2	0	2	0
20484885|F|0-21:T>A-21:T>A	TGCAGAATACAAAATGCTATGTGCCACAAAATTTTTCTTTACTTCAGCAAATAATACACATTGATCATG	TGCAGAATACAAAATGCTATGTGCCACAAAATTTTTCTTTACTTCAGCAAATAATACACATTGATCATG	scaffold03812	127320	1	4.73568e-29	Chromosome03	8568500	1	5.18104e-29	21:T>A	21	1	1	0.159574	0.840426	0	0.159574	0	0.268221	0.13411	20.4237	10.5882	1	0	0	0	0	0	0	0	0	2	0	0	0	0	2	0	0	0	0	0	0	0	0	0	0	0
13858627|F|0-31:A>G-31:A>G	TGCAGAATACAAGAACATGATGATGCGCATGACTGAAGTGGAAAAGAATTTGAATGTTCTTGCATCAAG	TGCAGAATACAAGAACATGATGATGCGCATGACTGAAGTGGAAAAGAATTTGAATGTTCTTGCATCAAG	scaffold09414	6327	1	4.73568e-29	Chromosome04	20938763	1	5.18104e-29	31:A>G	31	1	1	0.202128	0.797872	0	0.202128	0	0.322544	0.161272	16.7373	10.88	1	0	0	0	0	0	0	2	0	2	0	0	0	0	2	0	0	0	0	0	0	2	2	0	2	0
7111659|F|0-28:G>C-28:G>C	TGCAGAATACAGCCTTCATTTGAACCATGACCATCTTTAGCTACGTCCCATAGCCCCTATTACACCATA	TGCAGAATACAGCCTTCATTTGAACCATGACCATCTTTAGCTACGTCCCATAGCCCCTATTACACCATA	scaffold10367	16596	1	4.73568e-29	Chromosome01	34815622	1	5.18104e-29	28:G>C	28	1	1	0.287234	0.712766	0	0.287234	0	0.409461	0.204731	9.66667	6.66667	1	0	2	0	2	2	0	2	0	0	0	0	0	0	2	0	0	0	2	0	0	2	2	0	2	0
7107048|F|0-26:C>G-26:C>G	TGCAGAATACATGCTTTCCACCCATACAGGAAGAAATGACAAGTGATTATTTCTGGGAGAATTTTCTGA	TGCAGAATACATGCTTTCCACCCATACAGGAAGAAATGACAAGTGATTATTTCTGGGAGAATTTTCTGA	scaffold06631	348665	1	4.73568e-29	Chromosome06	1236609	1	5.18104e-29	26:C>G	26	1	1	0.06383	0.93617	0	0.06383	0	0.119511	0.059756	15.8898	8.33333	1	0	0	2	0	0	0	0	0	0	0	0	0	0	0	2	0	0	0	0	0	2	0	0	0	0
7139104|F|0-18:G>A-18:G>A	TGCAGAATACATGGCAATGATAGTTCCCGTCTTATAAACTTGTCCAGAATTATATAACTATGCATCAGA	TGCAGAATACATGGCAATGATAGTTCCCGTCTTATAAACTTGTCCAGAATTATATAACTATGCATCAGA	scaffold06692	37854	1	1.0251e-25	Chromosome04	21050057	1	1.1215e-25	18:G>A	18	1	0.87234	0.404255	0.595745	0.12766	0.276596	0.222725	0.481666	0.352196	10.1863	6.96	1	2	1	2	0	2	0	1	0	0	0	2	2	0	1	2	0	2	0	0	2	1	0	0	0	0
7116734|F|0-36:T>G-36:T>G	TGCAGAATACTCAATTATAGAGTATCTGGCTTAGCTTTAGCTTTAGCTTATATATATCTATATATGTGT	TGCAGAATACTCAATTATAGAGTATCTGGCTTAGCTTTAGCTTTAGCTTATATATATCTATATATGTGT	scaffold05140	82809	1	2.2033e-27	Chromosome13	15837586	1	2.4105e-27	36:T>G	36	0.893617	0.154762	0.892857	0.107143	0.845238	0.047619	0.261621	0.191327	0.226474	5.4375	6.78723	1	1	-	1	1	1	1	1	1	1	1	2	0	1	1	1	1	1	1	-	1	1	0	1	1	0
7125553|F|0-44:T>C-44:T>C	TGCAGAATACTGCAATCACGACAGTTAGCTTTTATTAGTTTTTGTCTCCTGAAAATAGATGGGGTGGAT	TGCAGAATACTGCAATCACGACAGTTAGCTTTTATTAGTTTTTGTCTCCTGAAAATAGATGGGGTGGAT	scaffold04882	534582	1	3.6869e-25	Chromosome01	33849850	1	4.03363e-25	44:T>C	44	0.904255	0.988235	0.058824	0.941176	0.011765	0.047059	0.023253	0.110727	0.06699	6.73333	4	1	0	-	2	0	0	0	0	0	0	0	0	0	0	0	0	0	0	0	-	0	0	0	-	0	-
20471375|F|0-34:T>C-34:T>C	TGCAGAATACTTTACAAGTCAATAAAACTAAGACTAGAGCCCAGGTTCAAAAGCTTATAAGAGAAGGCC	TGCAGAATACTTTACAAGTCAATAAAACTAAGACTAGAGCCCAGGTTCAAAAGCTTATAAGAGAAGGCC	scaffold04043	263044	1	4.73568e-29	Chromosome02	5495905	1	5.18104e-29	34:T>C	34	0.882979	0.975904	0.036145	0.963855	0.024096	0.012048	0.047031	0.069676	0.058354	5.30612	3.25	1	1	0	0	-	0	0	0	0	0	0	0	0	0	0	0	0	0	0	0	0	0	0	0	-	0
7111665|F|0-18:G>A-18:G>A	TGCAGAATAGAAGCTAACGTTGTGGACATACTAACCACTTTCAACCGTTTGACAAGCCCACATTTTATA	TGCAGAATAGAAGCTAACGTTGTGGACATACTAACCACTTTCAACCGTTTGACAAGCCCACATTTTATA	scaffold07520	1891939	1	4.73568e-29	Chromosome01	25528152	1	5.18104e-29	18:G>A	18	1	0.882979	0.223404	0.776596	0.117021	0.106383	0.206655	0.34699	0.276822	16.2843	12.8571	1	0	0	0	2	2	0	0	0	1	0	0	0	0	0	1	0	0	1	0	0	2	0	0	1	0
20111141|F|0-64:C>T-64:C>T	TGCAGAATAGCAAACCTGTTCCAATGAGTCAAGTGTTGATATTGGAAGAATTGATGAAGAAAAGCCTTG	TGCAGAATAGCAAACCTGTTCCAATGAGTCAAGTGTTGATATTGGAAGAATTGATGAAGAAAAGCCTTG	scaffold11998	1266300	1	4.73568e-29	Chromosome05	5676282	1	5.18104e-29	64:C>T	64	1	1	0.06383	0.93617	0	0.06383	0	0.119511	0.059756	10.3644	5.55556	1	0	0	0	0	0	0	0	0	0	0	2	0	0	2	0	0	2	0	0	0	0	0	0	0	0
7107050|F|0-24:G>A-24:G>A	TGCAGAATAGCGAAAAAGTAATTTGTTTTTGCAATAACCAAAAGGATGTTACCTACTTACCTTCTCAAA	TGCAGAATAGCGAAAAAGTAATTTGTTTTTGCAATAACCAAAAGGATGTTACCTACTTACCTTCTCAAA	scaffold06948	503316	1	2.2033e-27	Chromosome12	31165311	1	2.4105e-27	24:G>A	24	1	0.765957	0.585106	0.414894	0.234043	0.351064	0.358533	0.485514	0.422024	12.8977	10.6377	1	0	2	1	1	0	0	1	0	2	0	0	2	0	1	1	0	2	2	0	2	1	1	0	1	2
13855419|F|0-26:G>T-26:G>T	TGCAGAATAGCTAAATTTTCAGGCATGATTGTGCACATTCTAAGGGTTATTTGTAGTCAGATTAGGCTA	TGCAGAATAGCTAAATTTTCAGGCATGATTGTGCACATTCTAAGGGTTATTTGTAGTCAGATTAGGCTA	scaffold07470	137734	1	2.2033e-27	Chromosome11	20950430	1	2.4105e-27	26:G>T	26	1	0.93617	0.43617	0.56383	0.06383	0.37234	0.119511	0.491852	0.305681	15.5909	10.7885	1	2	2	2	0	2	0	2	0	0	0	2	1	0	1	0	0	0	0	0	2	0	2	2	0	2
20484895|F|0-17:A>T-17:A>T	TGCAGAATAGCTATTGTAGATGAAAGAGAAATCACAGAAATCACCAACCCATTTTCACCTAGTCGTGAA	TGCAGAATAGCTATTGTAGATGAAAGAGAAATCACAGAAATCACCAACCCATTTTCACCTAGTCGTGAA	scaffold06582	97907	4	2.2033e-27	Chromosome15	9033333	4	2.4105e-27	17:A>T	17	0.840426	0.291139	0.822785	0.177215	0.708861	0.113924	0.412754	0.29162	0.352187	5.31034	5.2625	1	-	1	-	1	0	1	1	1	2	1	-	1	1	1	-	1	1	1	1	0	-	0	0	2	1
7107051|F|0-45:T>C-45:T>C	TGCAGAATAGCTCAAGACAGTGTGCATGTCTGTCTGTGACTCATGTTTTTTATTCAATACGTCTCAAAT	TGCAGAATAGCTCAAGACAGTGTGCATGTCTGTCTGTGACTCATGTTTTTTATTCAATACGTCTCAAAT	scaffold07490	32828	1	2.2033e-27	Chromosome17	9699134	1	2.4105e-27	45:T>C	45	0.978723	0.619565	0.630435	0.369565	0.380435	0.25	0.471408	0.465974	0.468691	10.7671	9.49296	1	0	1	0	0	2	1	2	1	0	1	0	1	1	0	0	1	0	0	0	2	2	1	2	0	2
7111670|F|0-16:A>G-16:A>G	TGCAGAATAGGACTGCAAAAGCATGATAAGTTGGAAGTGTAGGCCCTAGGCTGATTTCCAATCAAACTT	TGCAGAATAGGACTGCAAAAGCATGATAAGTTGGAAGTGTAGGCCCTAGGCTGATTTCCAATCAAACTT	scaffold03224	12087	1	4.73568e-29	Chromosome11	22907234	1	5.18104e-29	16:A>G	16	1	0.989362	0.212766	0.787234	0.010638	0.202128	0.02105	0.334993	0.178022	12.0948	7.64	1	0	0	0	2	0	0	2	0	1	0	0	0	0	0	0	0	0	0	0	0	2	0	0	2	0
7111671|F|0-10:T>C-10:T>C	TGCAGAATAGTAGATGGAAATTCATGTACATATGCTCAAAGGACACCGTCTACAATTATAAGTTTCTTA	TGCAGAATAGTAGATGGAAATTCATGTACATATGCTCAAAGGACACCGTCTACAATTATAAGTTTCTTA	scaffold06609	59614	1	4.73568e-29	Chromosome01	21890060	1	5.18104e-29	10:T>C	10	1	0.904255	0.265957	0.734043	0.095745	0.170213	0.173155	0.390448	0.281802	23.9333	17.8182	1	0	0	0	1	0	0	0	0	2	0	2	0	0	2	1	0	0	2	0	0	2	0	0	1	0
7107052|F|0-18:T>C-18:T>C	TGCAGAATAGTGCCCTTGTCAATTTGCTGTCCCATATGAAAATTTGTGCCAAATCATAGGTTCTTGGTC	TGCAGAATAGTGCCCTTGTCAATTTGCTGTCCCATATGAAAATTTGTGCCAAATCATAGGTTCTTGGTC	scaffold04043	984504	1	2.2033e-27	Chromosome02	4796112	1	2.4105e-27	18:T>C	18	1	0.851064	0.510638	0.489362	0.148936	0.361702	0.253508	0.499774	0.376641	15.89	14.75	1	0	1	1	2	2	0	1	0	2	0	0	1	0	2	2	0	0	2	0	0	2	0	0	2	0
7111673|F|0-29:T>A-29:T>A	TGCAGAATAGTTCAAAATCTTACCCTGTCTCTGGTTCTTGCCTGCTACTGTTCATGTTATGTATTGTAA	TGCAGAATAGTTCAAAATCTTACCCTGTCTCTGGTTCTTGCCTGCTACTGTTCATGTTATGTATTGTAA	scaffold07859	21044	1	2.2033e-27	Chromosome16	24600710	1	2.4105e-27	29:T>A	29	1	0.968085	0.276596	0.723404	0.031915	0.244681	0.061793	0.400181	0.230987	17.1404	11.9091	1	0	1	2	2	0	0	2	0	2	0	0	0	0	2	0	0	0	0	0	0	0	2	0	0	2
13860817|F|0-34:G>A-34:G>A	TGCAGAATAGTTTGATGATCCTGCATTACATTCCGACTCATTTTTCTATCTCAATTTCCCTCTTCTTAC	TGCAGAATAGTTTGATGATCCTGCATTACATTCCGACTCATTTTTCTATCTCAATTTCCCTCTTCTTAC	scaffold06278	51877	1	1.70326e-28	Chromosome03	23278792	1	1.86343e-28	34:G>A	34	1	1	0.031915	0.968085	0	0.031915	0	0.061793	0.030896	19.0424	6	1	0	0	2	0	0	0	0	0	0	0	0	0	0	0	0	0	0	0	0	0	0	0	0	0	0
7128212|F|0-67:T>A-67:T>A	TGCAGAATATAATTTGGATGATACATGAATAATGAGCTGTATTTTCATCATAGTATTAGCCATTCTGTA	TGCAGAATATAATTTGGATGATACATGAATAATGAGCTGTATTTTCATCATAGTATTAGCCATTCTGTA	scaffold07087	270620	1	4.73568e-29	Chromosome09	2883492	1	5.18104e-29	67:T>A	67	0.989362	1	0.064516	0.935484	0	0.064516	0	0.120708	0.060354	8.92308	5.71429	1	0	0	0	0	0	0	0	0	0	0	0	0	0	0	0	0	0	0	0	0	0	2	0	0	0
34220259|F|0-19:G>A-19:G>A	TGCAGAATATACTGTATGTGTTGTCTGATAGATAATCCTTTCTTATTATTATTTTTTTTATCGATACAG	TGCAGAATATACTGTATGTGTTGTCTGATAGATAATCCTTTCTTATTATTATTTTTTTTATCGATACAG	scaffold09150	495912	1	1.0251e-25	Chromosome13	13564672	1	1.1215e-25	19:G>A	19	1	0.861702	0.56383	0.43617	0.138298	0.425532	0.238343	0.491852	0.365097	7.53465	5.67647	1	2	0	2	0	2	0	2	0	1	0	2	2	0	1	2	0	2	2	2	0	2	1	0	1	2
20493139|F|0-42:G>A-42:G>A	TGCAGAATATCAGAAGAAGTAAATTATATATTTTTGTAACATGAGAAATAGACATCAAAAGAAATAGGT	TGCAGAATATCAGAAGAAGTAAATTATATATTTTTGTAACATGAGAAATAGACATCAAAAGAAATAGGT	scaffold03614	2468486	1	4.73568e-29	Chromosome09	26535656	1	5.18104e-29	42:G>A	42	0.968085	0.989011	0.032967	0.967033	0.010989	0.021978	0.021737	0.06376	0.042748	11.6518	7.25	1	-	0	0	0	0	0	0	0	0	0	0	0	0	0	2	0	0	-	0	0	0	0	0	0	0
7107057|F|0-12:T>A-12:T>A	TGCAGAATATCCTGTGTCCGCATCAGGTTTCTTCTGTTTTTCTGGACAACTAAGTGTTAGTTGCCAGGC	TGCAGAATATCCTGTGTCCGCATCAGGTTTCTTCTGTTTTTCTGGACAACTAAGTGTTAGTTGCCAGGC	scaffold06598	374445	1	4.73568e-29	Chromosome16	433315	1	5.18104e-29	12:T>A	12	1	0.925532	0.56383	0.43617	0.074468	0.489362	0.137845	0.491852	0.314848	12.4273	9	1	0	2	2	2	2	0	2	0	0	0	2	0	0	2	0	0	0	0	2	0	2	1	0	2	2
7107058|F|0-14:G>A-14:G>A	TGCAGAATATCCTCGTCAGATAATTCAAATTGCACTGGAGTCCTGGGAGATTTATTTATAAAGAATATG	TGCAGAATATCCTCGTCAGATAATTCAAATTGCACTGGAGTCCTGGGAGATTTATTTATAAAGAATATG	scaffold11010	55542	1	4.73568e-29	Chromosome17	2920413	1	5.18104e-29	14:G>A	14	1	0.574468	0.797872	0.202128	0.425532	0.37234	0.488909	0.322544	0.405727	7.81159	9.29787	1	1	0	2	2	2	1	2	1	2	1	2	2	1	0	0	1	2	2	1	1	0	1	2	0	0
7122621|F|0-28:C>A-28:C>A	TGCAGAATATCTGAATGAACACCCTAAACGAAGGGGAGAAGAAAAATAAAATAGCACCATCAATGTGCA	TGCAGAATATCTGAATGAACACCCTAAACGAAGGGGAGAAGAAAAATAAAATAGCACCATCAATGTGCA	scaffold03614	1373346	1	4.73568e-29	Chromosome09	25428359	1	5.18104e-29	28:C>A	28	1	0.819149	0.87234	0.12766	0.180851	0.691489	0.296288	0.222725	0.259507	19.6316	18.0097	1	0	2	1	1	2	2	2	2	1	2	2	2	0	1	2	2	2	2	1	1	2	2	0	2	2
7111662|F|0-9:T>C-9:T>C	TGCAGAATATGGAAAATAGCTATCTGCATCAATCCAAACTCCTTTCATGGAGGTTCTCAGCTTCTTTCA	TGCAGAATATGGAAAATAGCTATCTGCATCAATCCAAACTCCTTTCATGGAGGTTCTCAGCTTCTTTCA	scaffold08359	2036368	1	4.73568e-29	Chromosome14	6341948	1	5.18104e-29	9:T>C	9	1	1	0.223404	0.776596	0	0.223404	0	0.34699	0.173495	6.94068	3.03846	1	0	2	2	0	0	0	2	0	2	0	0	0	0	2	0	0	0	0	0	0	0	0	0	0	2
7111685|F|0-30:A>T-30:A>T	TGCAGAATATTAGGAGCTCATGATAATAATAATAATAATGCACAAGCCGCAAATTTTGATTGTGGTGTA	TGCAGAATATTAGGAGCTCATGATAATAATAATAATAATGCACAAGCCGCAAATTTTGATTGTGGTGTA	scaffold07520	1948942	1	4.73568e-29	Chromosome01	25582252	1	5.18104e-29	30:A>T	30	1	0.925532	0.297872	0.702128	0.074468	0.223404	0.137845	0.418289	0.278067	6.6055	4.71875	1	2	0	1	0	2	0	1	0	0	0	0	0	0	0	0	0	0	0	2	0	2	0	0	0	2
7107062|F|0-7:T>C-7:T>C	TGCAGAATATTATCGTTCCATTCATACTAAAATCAAGAAATTGCAAAGCTATGGTGATCAGTACTTACA	TGCAGAATATTATCGTTCCATTCATACTAAAATCAAGAAATTGCAAAGCTATGGTGATCAGTACTTACA	scaffold07012	1328381	2	3.6869e-25	Chromosome18	2564881	1	1.12946e-20	7:T>C	7	0.989362	0.913978	0.301075	0.698925	0.086022	0.215054	0.157244	0.420858	0.289051	13.7315	8.52778	1	0	0	0	2	2	0	0	0	2	0	0	0	0	2	2	0	0	2	0	0	0	0	2	1	2
7111686|F|0-31:C>T-31:C>T	TGCAGAATATTCGCCAAGCTGTTCTGCATTACAGAAAGGTTGTCAATCAACAACATGTTGAGCCAAGAG	TGCAGAATATTCGCCAAGCTGTTCTGCATTACAGAAAGGTTGTCAATCAACAACATGTTGAGCCAAGAG	scaffold07571	248651	1	4.73568e-29	Chromosome01	31783016	1	5.18104e-29	31:C>T	31	1	1	0.308511	0.691489	0	0.308511	0	0.426664	0.213332	10.5424	6.51282	1	0	2	0	2	2	0	2	0	0	0	0	2	0	2	0	0	0	2	0	0	2	2	0	2	0
7111688|F|0-51:G>A-51:G>A	TGCAGAATATTTCATTCCTTCAGGATGGAAAGTGTTACCTGTGTTTACAGGGGCACATTTTGATCCATC	TGCAGAATATTTCATTCCTTCAGGATGGAAAGTGTTACCTGTGTTTACAGGGGCACATTTTGATCCATC	scaffold11635	204148	1	2.2033e-27	Chromosome15	12050711	1	2.4105e-27	51:G>A	51	0.978723	0.467391	0.695652	0.304348	0.532609	0.163043	0.497873	0.42344	0.460657	8.61404	12.3125	1	0	1	2	1	0	1	0	1	0	1	2	2	1	0	0	1	1	0	1	2	0	2	1	2	1
7147080|F|0-27:A>G-27:A>G	TGCAGAATATTTGGCATATGAGTGTGGAAAACATGTTCTTGTCATTCTTACAGATATGAGTTCTTATGC	TGCAGAATATTTGGCATATGAGTGTGGAAAACATGTTCTTGTCATTCTTACAGATATGAGTTCTTATGC	scaffold03329	171603	1	4.73568e-29	Chromosome04	20274775	1	5.18104e-29	27:A>G	27	0.893617	0.952381	0.22619	0.77381	0.047619	0.178571	0.090703	0.350057	0.22038	5.9899	7	1	0	0	0	0	-	0	2	0	2	0	0	0	0	2	0	0	0	0	0	0	2	0	0	2	0
7111690|F|0-52:C>T-52:C>T	TGCAGAATCAAAAAGCACATAACCCAAAGGTCCAACCTTTGTTTTCTCCACCCGTACTCCTTTTCTAGT	TGCAGAATCAAAAAGCACATAACCCAAAGGTCCAACCTTTGTTTTCTCCACCCGTACTCCTTTTCTAGT	scaffold06914	542676	1	4.73568e-29	Chromosome07	1439087	1	5.18104e-29	52:C>T	52	1	0.574468	0.840426	0.159574	0.425532	0.414894	0.488909	0.268221	0.378565	6.85507	8.30693	1	2	0	1	2	2	1	2	1	2	1	2	2	2	0	2	1	2	1	1	2	2	1	1	2	0
13858630|F|0-51:T>C-51:T>C	TGCAGAATCAAAGAAAGATCTGGTAAGTGTAGACATCTAATAAAGTCTGTGTTTCCTATCTGTGAACAT	TGCAGAATCAAAGAAAGATCTGGTAAGTGTAGACATCTAATAAAGTCTGTGTTTCCTATCTGTGAACAT	scaffold01945	166615	1	2.2033e-27	Chromosome03	28337551	1	2.4105e-27	51:T>C	51	1	0.553191	0.968085	0.031915	0.446809	0.521277	0.494341	0.061793	0.278067	5.87879	8.36842	1	2	2	1	1	1	2	1	2	2	2	2	1	1	2	1	2	0	1	2	2	1	1	2	2	2
7111691|F|0-38:T>C-38:T>C	TGCAGAATCAAATCTACATTTACTGTGTTGCCTAAATGTAATGAATGGTTCTAAGCAACATCTTTATGT	TGCAGAATCAAATCTACATTTACTGTGTTGCCTAAATGTAATGAATGGTTCTAAGCAACATCTTTATGT	scaffold05875	920252	1	4.73568e-29	Chromosome04	27139809	1	5.18104e-29	38:T>C	38	1	1	0.595745	0.404255	0	0.595745	0	0.481666	0.240833	19.4407	13.7015	1	0	0	0	0	0	2	2	2	2	2	0	0	2	0	0	2	2	0	2	0	2	0	0	2	0
7111693|F|0-51:C>A-51:C>A	TGCAGAATCAACTCTACAATGAATCCATTTCTGAGCTTCAGAAGAAGGTAACGTTTTCTTGCTTTTGAT	TGCAGAATCAACTCTACAATGAATCCATTTCTGAGCTTCAGAAGAAGGTAACGTTTTCTTGCTTTTGAT	scaffold12086	29332	1	4.73568e-29	Chromosome01	22560864	1	5.18104e-29	51:C>A	51	1	0.87234	0.776596	0.223404	0.12766	0.648936	0.222725	0.34699	0.284857	10.534	9.13636	1	0	2	2	0	2	2	2	2	0	2	0	2	1	2	0	2	0	0	1	2	0	1	2	0	2
7125573|F|0-67:A>G-67:A>G	TGCAGAATCAACTGAAATGTTTTCCTGAAATATCATACCTATTTTGGTGTGATTTCCAATCTCTACAAG	TGCAGAATCAACTGAAATGTTTTCCTGAAATATCATACCTATTTTGGTGTGATTTCCAATCTCTACAAG	scaffold06799	44560	1	6.12599e-28	Chromosome02	22837663	1	6.7021e-28	67:A>G	67	0.978723	0.608696	0.586957	0.413043	0.391304	0.195652	0.476371	0.484877	0.480624	29.3623	20.1029	1	0	0	1	0	2	1	0	1	0	1	1	1	1	0	1	1	2	2	0	0	1	0	1	0	0
7139109|F|0-15:T>G-15:T>G	TGCAGAATCAAGAAGTTATGTCTAGACTAAAATACCAATTCCATAGTCTTTGAGCAGTGTAACAATGAG	TGCAGAATCAAGAAGTTATGTCTAGACTAAAATACCAATTCCATAGTCTTTGAGCAGTGTAACAATGAG	scaffold03317	63254	1	4.73568e-29	Chromosome12	5542842	1	5.18104e-29	15:T>G	15	1	1	0.329787	0.670213	0	0.329787	0	0.442055	0.221028	13.1525	7.4	1	0	2	2	0	2	0	0	0	2	0	0	0	2	0	2	0	0	2	2	0	0	0	2	0	2
7111695|F|0-53:C>G-53:C>G	TGCAGAATCAAGAGACAACAAAAGAAATGGTGAAAATATGCAAACTGTTGGCTCTATTTGAGTGACTGT	TGCAGAATCAAGAGACAACAAAAGAAATGGTGAAAATATGCAAACTGTTGGCTCTATTTGAGTGACTGT	scaffold08686	314474	1	4.73568e-29	Chromosome14	12480362	1	5.18104e-29	53:C>G	53	1	1	0.095745	0.904255	0	0.095745	0	0.173155	0.086578	5.89831	3	1	0	0	0	0	2	0	0	0	0	0	0	0	0	0	0	0	0	0	0	0	0	0	0	0	0
7143157|F|0-11:G>T-11:G>T	TGCAGAATCAAGAGCTATTGATGGGTTACAATGAGTATGAGAGTCTGTCCTGGGGAATAAAGGTCCTGC	TGCAGAATCAAGAGCTATTGATGGGTTACAATGAGTATGAGAGTCTGTCCTGGGGAATAAAGGTCCTGC	scaffold01525	40725	1	4.73568e-29	Chromosome07	19244792	1	5.18104e-29	11:G>T	11	1	0.978723	0.457447	0.542553	0.021277	0.43617	0.041648	0.496378	0.269013	11.8448	8.22222	1	0	2	0	2	2	0	2	0	0	0	2	0	0	2	0	0	2	2	0	0	2	2	0	2	2
7107063|F|0-27:A>G-27:A>G	TGCAGAATCAATAAACTCTATAATACCAAGCTCGTACTAAGTCGATGCCTATTTATAAAGGAAATATAT	TGCAGAATCAATAAACTCTATAATACCAAGCTCGTACTAAGTCGATGCCTATTTATAAAGGAAATATAT	scaffold09372	377706	1	4.73568e-29	Chromosome17	27187145	1	5.18104e-29	27:A>G	27	1	0.202128	0.968085	0.031915	0.797872	0.170213	0.322544	0.061793	0.192168	9.09091	14.0956	1	1	1	1	1	2	1	1	1	1	1	1	1	1	1	1	1	1	2	2	1	1	1	1	1	1
7110686|F|0-32:G>A-32:G>A	TGCAGAATCAATAACATAATCACAATATCAACGGCCAAACAAAATTACAGATTACAACTGGATGGACAA	TGCAGAATCAATAACATAATCACAATATCAACGGCCAAACAAAATTACAGATTACAACTGGATGGACAA	scaffold04305	130488	1	4.73568e-29	Chromosome09	22738600	1	5.18104e-29	32:G>A	32	1	0.957447	0.276596	0.723404	0.042553	0.234043	0.081485	0.400181	0.240833	18.8584	12.2812	1	0	0	0	0	2	0	0	0	2	0	0	0	0	0	0	0	0	2	0	2	0	2	0	1	0
7111697|F|0-46:G>A-46:G>A	TGCAGAATCAATGCTTCATAGAACTTTCAGCATAAACTGAGCATCGGAGCTGTCCTACATTGCAAGTCT	TGCAGAATCAATGCTTCATAGAACTTTCAGCATAAACTGAGCATCGGAGCTGTCCTACATTGCAAGTCT	scaffold06918	62822	1	4.73568e-29	Chromosome13	26666961	1	5.18104e-29	46:G>A	46	1	0.946809	0.351064	0.648936	0.053191	0.297872	0.100724	0.455636	0.27818	15.6696	11.4762	1	0	2	2	1	0	0	2	0	2	0	0	2	0	2	2	0	0	0	0	0	0	0	0	2	0
7111698|F|0-66:C>A-66:C>A	TGCAGAATCAATTCAATCAATGTGATCAGAAAAAACTAAAGCATGTTACAAAGAAATAGAAAACAACAA	TGCAGAATCAATTCAATCAATGTGATCAGAAAAAACTAAAGCATGTTACAAAGAAATAGAAAACAACAA	scaffold06512	1664766	1	4.73568e-29	Chromosome02	8619728	1	5.18104e-29	66:C>A	66	1	0.978723	0.265957	0.734043	0.021277	0.244681	0.041648	0.390448	0.216048	12.9304	6.09091	1	0	1	0	2	0	0	2	0	2	0	0	0	0	2	2	0	0	2	0	0	2	0	0	0	0
7117004|F|0-21:C>T-21:C>T	TGCAGAATCACAGTTCAGCTGCATCCACCTCTCAATGTAAGTAGTATGTACATTTACCATTCCATTTAC	TGCAGAATCACAGTTCAGCTGCATCCACCTCTCAATGTAAGTAGTATGTACATTTACCATTCCATTTAC	scaffold04796	477274	1	1.70326e-28	Chromosome03	1337422	1	1.86343e-28	21:C>T	21	1	0.968085	0.585106	0.414894	0.031915	0.553191	0.061793	0.485514	0.273653	14.4298	10.6429	1	0	2	2	0	0	2	2	2	0	2	2	2	2	2	0	2	2	0	2	0	0	2	1	0	0
7111700|F|0-10:T>C-10:T>C	TGCAGAATCATATTTGTTTATTCTCTGGTTGGATGCGAGAATTTTATGGGCCTGGTTTTCTAGAAGTAA	TGCAGAATCATATTTGTTTATTCTCTGGTTGGATGCGAGAATTTTATGGGCCTGGTTTTCTAGAAGTAA	scaffold01551	649315	1	2.2033e-27	Chromosome15	3078826	1	2.4105e-27	10:T>C	10	1	0.925532	0.574468	0.425532	0.074468	0.5	0.137845	0.488909	0.313377	8.61818	7.10448	1	2	2	2	0	0	2	0	2	2	2	2	0	2	0	0	2	0	0	2	2	0	0	1	0	2
7147091|F|0-62:A>G-62:A>G	TGCAGAATCACTTGCATGCAACAAGTTTGAAGGATATGATCATATTCAGTCTATACTAGAAGAAAGGAA	TGCAGAATCACTTGCATGCAACAAGTTTGAAGGATATGATCATATTCAGTCTATACTAGAAGAAAGGAA	scaffold11862	86613	1	4.73568e-29	Chromosome04	10736399	1	5.18104e-29	62:A>G	62	1	0.989362	0.106383	0.893617	0.010638	0.095745	0.02105	0.190131	0.105591	7.8547	4.08333	1	2	0	0	0	0	0	0	0	0	0	0	0	0	0	0	0	0	0	0	0	0	2	0	0	0
7143161|F|0-67:G>A-67:G>A	TGCAGAATCAGACTGCTGTCGCTCTCTAAGCTTGTTCTCTAGTTCCTTGACCTTCACCAGACAGTAAGC	TGCAGAATCAGACTGCTGTCGCTCTCTAAGCTTGTTCTCTAGTTCCTTGACCTTCACCAGACAGTAAGC	scaffold09466	14035	1	6.12599e-28	Chromosome13	22267475	1	6.7021e-28	67:G>A	67	1	0.904255	0.478723	0.521277	0.095745	0.382979	0.173155	0.499095	0.336125	19.514	16.1864	1	2	1	0	2	2	0	0	0	2	0	2	1	0	2	2	0	2	2	2	0	2	0	0	2	1
7119851|F|0-14:A>G-14:A>G	TGCAGAATCAGAGGAGACAAAATATCGCCAACATCCTTCGGGGACATAAAGACCAGCGAATGACACTTG	TGCAGAATCAGAGGAGACAAAATATCGCCAACATCCTTCGGGGACATAAAGACCAGCGAATGACACTTG	scaffold02369	10128	1	4.73568e-29	Chromosome10	11196385	1	5.18104e-29	14:A>G	14	1	0.946809	0.414894	0.585106	0.053191	0.361702	0.100724	0.485514	0.293119	11.25	7.14286	1	0	0	0	0	0	2	0	2	0	2	0	0	2	0	0	2	2	0	1	2	2	0	2	0	0
7111706|F|0-44:C>T-44:C>T	TGCAGAATCAGATTTAGGATTACTTCTATCTAAACCCTTTTCTACAAATACAGAAACTCTAGATTTCTT	TGCAGAATCAGATTTAGGATTACTTCTATCTAAACCCTTTTCTACAAATACAGAAACTCTAGATTTCTT	scaffold07670	232241	1	4.73568e-29	Chromosome08	6504996	1	5.18104e-29	44:C>T	44	1	0.968085	0.287234	0.712766	0.031915	0.255319	0.061793	0.409461	0.235627	14	5.67647	1	0	2	2	2	2	0	2	0	0	0	0	0	0	0	0	0	0	0	2	0	0	2	0	0	0
7111709|F|0-17:T>A-17:T>A	TGCAGAATCAGTTTGAATAAAATGAGCAAAATGAAGGTTGGAAAGATATTGCTTTTTCTCCTCTGCTTG	TGCAGAATCAGTTTGAATAAAATGAGCAAAATGAAGGTTGGAAAGATATTGCTTTTTCTCCTCTGCTTG	scaffold03070	73487	1	2.2033e-27	Chromosome06	6219340	1	2.4105e-27	17:T>A	17	1	0.957447	0.308511	0.691489	0.042553	0.265957	0.081485	0.426664	0.254074	7.95575	5.19444	1	0	2	0	2	0	0	0	0	2	0	2	0	0	0	2	0	0	2	0	0	2	0	0	1	1
7109800|F|0-63:C>T-63:C>T	TGCAGAATCATATGTAACCAGAAATTTATCAGAGAAAAACAGTCTGCAAAATGCAGATTGATTCCTTTT	TGCAGAATCATATGTAACCAGAAATTTATCAGAGAAAAACAGTCTGCAAAATGCAGATTGATTCCTTTT	scaffold07520	2797299	1	4.73568e-29	Chromosome01	26418383	1	5.18104e-29	63:C>T	63	1	1	0.234043	0.765957	0	0.234043	0	0.358533	0.179267	33.3898	17.3548	1	0	2	2	0	0	0	2	0	0	0	0	2	0	2	2	0	0	2	0	0	2	2	0	0	0
7111710|F|0-16:A>C-16:A>C	TGCAGAATCATCAAACAGGGATGAAATCTTAGAGCTTATAGATGTAATGCTGGGCCCTTGGGAAGAGGA	TGCAGAATCATCAAACAGGGATGAAATCTTAGAGCTTATAGATGTAATGCTGGGCCCTTGGGAAGAGGA	scaffold06556	104715	1	4.73568e-29	Chromosome06	27836458	1	5.18104e-29	16:A>C	16	1	0.393617	0.893617	0.106383	0.606383	0.287234	0.477365	0.190131	0.333748	7	6.4	1	2	1	2	1	1	1	0	1	2	1	1	1	1	2	2	1	1	0	1	2	2	1	1	1	1
13855427|F|0-35:G>C-35:G>C	TGCAGAATCCAAACCCAAAACTGTAGACTCTAGCAGCAATCAGAATTTCAGGATGCAACATTTCTGCTA	TGCAGAATCCAAACCCAAAACTGTAGACTCTAGCAGCAATCAGAATTTCAGGATGCAACATTTCTGCTA	scaffold05618	168258	1	4.73568e-29	Chromosome06	2964836	1	5.18104e-29	35:G>C	35	1	1	0.425532	0.574468	0	0.425532	0	0.488909	0.244455	15.7034	11.42	1	2	0	0	0	2	2	0	2	0	2	2	0	2	0	0	2	0	0	2	0	0	0	2	0	0
7111711|F|0-9:T>C-9:T>C	TGCAGAATCTAAACTCTCCAAGCAATGAGAAGCAATAAATGTGTGGCTGTGCTCAAGCATGTTTACGCA	TGCAGAATCTAAACTCTCCAAGCAATGAGAAGCAATAAATGTGTGGCTGTGCTCAAGCATGTTTACGCA	scaffold07575	15466	1	2.2033e-27	Chromosome05	21039020	1	2.4105e-27	9:T>C	9	1	0.638298	0.914894	0.085106	0.361702	0.553191	0.461747	0.155727	0.308737	14.5405	19.2018	1	1	1	1	2	2	2	1	2	1	2	2	0	1	1	1	2	1	2	2	2	2	1	2	2	1
7122624|F|0-32:G>A-32:G>A	TGCAGAATCCAACAACAGATATCAGAAAACGCGCAAGGGCAAGAAACTCAAGCCTAGGTTTGGGATAAT	TGCAGAATCCAACAACAGATATCAGAAAACGCGCAAGGGCAAGAAACTCAAGCCTAGGTTTGGGATAAT	scaffold01760	55338	1	4.73568e-29	Chromosome09	16887370	1	5.18104e-29	32:G>A	32	1	0.446809	0.914894	0.085106	0.553191	0.361702	0.494341	0.155727	0.325034	25.2076	36.6542	1	1	2	2	2	2	1	2	1	2	1	1	1	1	2	0	1	1	1	1	1	0	2	1	0	2
13855430|F|0-33:A>G-33:A>G	TGCAGAATCCAGATAAGATCAATGCAACTAAATATATGCTACTGAATGTGGGTAATTTTTACTCACGTC	TGCAGAATCCAGATAAGATCAATGCAACTAAATATATGCTACTGAATGTGGGTAATTTTTACTCACGTC	scaffold08350	495	1	2.2033e-27	Chromosome17	13407389	1	2.4105e-27	33:A>G	33	1	0.957447	0.361702	0.638298	0.042553	0.319149	0.081485	0.461747	0.271616	21.193	16.2051	1	0	2	0	0	2	0	0	0	0	0	2	0	0	2	0	0	0	0	0	0	0	2	0	0	2
7111714|F|0-37:C>T-37:C>T	TGCAGAATCCATTCAAGTGGGCAGTAAGACACTCACTCGCAAATTGCTTTTATGGGAGTAAACGGCAAG	TGCAGAATCCATTCAAGTGGGCAGTAAGACACTCACTCGCAAATTGCTTTTATGGGAGTAAACGGCAAG	scaffold11495	238571	1	4.73568e-29	Chromosome01	28411116	1	5.18104e-29	37:C>T	37	1	1	0.297872	0.702128	0	0.297872	0	0.418289	0.209144	26.8729	14.0513	1	0	2	2	2	0	0	2	0	0	0	0	2	0	2	2	0	0	2	0	0	2	2	0	2	0
13858636|F|0-23:A>G-23:A>G	TGCAGAATCCCACAAATCAAAGCAGCAGCCACCACCTTCTTTGCAAGCTTTCTTGAACGACTTGCCTGG	TGCAGAATCCCACAAATCAAAGCAGCAGCCACCACCTTCTTTGCAAGCTTTCTTGAACGACTTGCCTGG	scaffold09414	33395	1	4.73568e-29	Chromosome04	20911375	1	5.18104e-29	23:A>G	23	1	1	0.202128	0.797872	0	0.202128	0	0.322544	0.161272	41.1441	23.36	1	0	0	0	0	0	0	2	0	2	0	0	0	0	2	0	0	0	0	0	0	2	2	0	2	0
20484943|F|0-60:T>C-60:T>C	TGCAGAATCCCCGTGCAGTTTGTTCTCTGAAAAAGCTGGTTATGATCAATAAGTCTTATGTAATTTTTC	TGCAGAATCCCCGTGCAGTTTGTTCTCTGAAAAAGCTGGTTATGATCAATAAGTCTTATGTAATTTTTC	scaffold02040	266437	1	4.73568e-29	Chromosome03	16648072	1	5.18104e-29	60:T>C	60	1	1	0.180851	0.819149	0	0.180851	0	0.296288	0.148144	8.24576	5	1	0	0	0	0	0	0	2	0	0	0	0	0	0	0	2	0	0	0	0	0	2	2	2	0	0
7107069|F|0-33:T>A-33:T>A	TGCAGAATCCGATGGCGATTCATATAATGCAGATATGAAGAAGTTCAGGCATATGGCATCGTCAAGCCA	TGCAGAATCCGATGGCGATTCATATAATGCAGATATGAAGAAGTTCAGGCATATGGCATCGTCAAGCCA	scaffold07520	1285988	1	4.73568e-29	Chromosome01	24929037	1	5.18104e-29	33:T>A	33	1	1	0.234043	0.765957	0	0.234043	0	0.358533	0.179267	7.0339	4.48387	1	0	2	2	0	0	0	2	0	0	0	0	2	0	2	2	0	0	2	0	0	2	2	0	0	0
20471430|F|0-6:T>A-6:T>A	TGCAGATTCTAAATTCCCTAGGCCAGCAGCTATTTTATGGAGAAGGAGGATAGTTGCCTACTGATCTGG	TGCAGATTCTAAATTCCCTAGGCCAGCAGCTATTTTATGGAGAAGGAGGATAGTTGCCTACTGATCTGG	scaffold06701	136022	1	4.73568e-29	Chromosome14	3130033	1	5.18104e-29	6:T>A	6	0.978723	0.913043	0.228261	0.771739	0.086957	0.141304	0.15879	0.352316	0.255553	3.94949	3	1	0	1	1	0	0	0	1	0	0	0	0	0	0	2	0	0	0	0	0	0	0	2	0	0	0
20484946|F|0-23:T>C-23:T>C	TGCAGAATCTAATGCTGGCCCTATATTGAATGAGCCCAAAAATGGGCCCCTAGGTGTGTGTTGAAAGTA	TGCAGAATCTAATGCTGGCCCTATATTGAATGAGCCCAAAAATGGGCCCCTAGGTGTGTGTTGAAAGTA	scaffold01616	47675	1	4.73568e-29	Chromosome03	14786882	1	5.18104e-29	23:T>C	23	1	1	0.031915	0.968085	0	0.031915	0	0.061793	0.030896	18.9915	6	1	0	0	0	0	0	0	0	0	0	0	0	0	0	0	0	0	0	0	0	0	0	0	0	0	0
7107076|F|0-27:G>C-27:G>C	TGCAGAATCTACAAGTATTGCACCTGCGGATTATATTTTCATACCAAGAAAATAATAAGCAGTAAACTA	TGCAGAATCTACAAGTATTGCACCTGCGGATTATATTTTCATACCAAGAAAATAATAAGCAGTAAACTA	scaffold12797	200866	1	2.2033e-27	Chromosome14	21218517	1	2.4105e-27	27:G>C	27	0.904255	0.847059	0.376471	0.623529	0.152941	0.223529	0.2591	0.469481	0.364291	14.0333	10.6512	1	-	2	2	1	-	0	2	0	0	0	1	0	0	2	0	0	1	1	0	2	2	2	2	0	0
7147116|F|0-49:T>A-49:T>A	TGCAGAATCTATGCGGAGGGCCAAATATTGTGAAGCTGCTCGATATTGTTAGAGATCAGCAATCAAAGA	TGCAGAATCTATGCGGAGGGCCAAATATTGTGAAGCTGCTCGATATTGTTAGAGATCAGCAATCAAAGA	scaffold03363	224371	1	4.73568e-29	Chromosome13	23979862	1	5.18104e-29	49:T>A	49	1	0.989362	0.170213	0.829787	0.010638	0.159574	0.02105	0.282481	0.151766	17.8547	10.0952	1	0	0	0	0	0	0	0	0	0	0	2	0	0	0	0	0	0	2	2	2	0	2	0	0	0
7139116|F|0-13:A>G-13:A>G	TGCAGAATCTCATAGTAATACCATAAAGGTACACAGCCAAAAATGGGTGATTGCCAGTTACACGTAGCG	TGCAGAATCTCATAGTAATACCATAAAGGTACACAGCCAAAAATGGGTGATTGCCAGTTACACGTAGCG	scaffold03750	1057040	1	4.73568e-29	Chromosome11	25701066	1	5.18104e-29	13:A>G	13	0.957447	0.911111	0.211111	0.788889	0.088889	0.122222	0.161975	0.333086	0.247531	14.3235	13.4	1	1	0	0	2	0	0	0	0	1	0	0	0	-	0	0	0	0	0	1	0	2	0	0	2	0
7111721|F|0-56:C>A-56:C>A	TGCAGAATCTCTCTATTATAATCCGATTTGGCATTTTATTGTAGCAACCTGGGAAACAGTTGTTTACAG	TGCAGAATCTCTCTATTATAATCCGATTTGGCATTTTATTGTAGCAACCTGGGAAACAGTTGTTTACAG	scaffold02906	328726	1	4.73568e-29	Chromosome01	29529822	1	5.18104e-29	56:C>A	56	1	1	0.276596	0.723404	0	0.276596	0	0.400181	0.200091	7.05932	4.02703	1	0	2	2	2	0	0	2	0	0	0	0	2	0	2	2	0	0	2	0	0	2	2	0	2	0
7107078|F|0-38:G>C-38:G>C	TGCAGAATCTCTGAAGCCCTTGTTGATTTACACTTTGAGAAGCACTCAGGCATCCTAATGTCATCAAAT	TGCAGAATCTCTGAAGCCCTTGTTGATTTACACTTTGAGAAGCACTCAGGCATCCTAATGTCATCAAAT	scaffold06697	38206	1	4.73568e-29	Chromosome15	12502721	1	5.18104e-29	38:G>C	38	1	1	0.244681	0.755319	0	0.244681	0	0.369624	0.184812	20.2119	11.4138	1	0	2	0	0	2	0	0	0	0	0	0	0	0	2	0	0	0	2	2	0	0	0	2	0	2
13855432|F|0-63:A>T-63:A>T	TGCAGAATCTGTCTGGGTTTTGGCTTCTCTCCTCTATACCTCTGCACATTTTTTCTTTGAGTTAGCCTG	TGCAGAATCTGTCTGGGTTTTGGCTTCTCTCCTCTATACCTCTGCACATTTTTTCTTTGAGTTAGCCTG	scaffold08974	70554	1	2.2033e-27	Chromosome12	8468136	1	2.4105e-27	63:A>T	63	1	0.978723	0.202128	0.797872	0.021277	0.180851	0.041648	0.322544	0.182096	12.9655	8.04762	1	0	0	0	0	0	0	0	0	0	0	0	2	0	0	0	0	0	0	0	0	0	2	0	0	0
20471449|F|0-52:G>A-52:G>A	TGCAGAATCTTGAAATCAAGAAAATCAATGATGAGAAGAAGGCTTCCATGGCGGCTCAGTTTGCAGCTG	TGCAGAATCTTGAAATCAAGAAAATCAATGATGAGAAGAAGGCTTCCATGGCGGCTCAGTTTGCAGCTG	scaffold10173	901636	2	4.73568e-29	Chromosome15	10275512	2	5.18104e-29	52:G>A	52	1	0.989362	0.042553	0.957447	0.010638	0.031915	0.02105	0.081485	0.051268	3.42241	2.8	1	0	0	0	0	0	0	0	0	0	0	0	0	0	0	0	0	0	0	0	0	0	2	0	0	0
7122627|F|0-20:C>T-20:C>T	TGCAGAATCTTGGAATGTTGCGCCAATCCCGCATCAGAGGCCATGGATAATGCCCTGAATTACAGATCG	TGCAGAATCTTGGAATGTTGCGCCAATCCCGCATCAGAGGCCATGGATAATGCCCTGAATTAC	scaffold10963	752815	1	3.26801e-25	Chromosome06	27161375	1	3.48359e-25	20:C>T	20	1	0.989362	0.265957	0.734043	0.010638	0.255319	0.02105	0.390448	0.205749	21.3675	14.0938	1	0	0	0	0	2	0	0	0	2	0	2	2	2	0	0	0	0	0	2	0	0	0	2	0	2
7119866|F|0-23:T>C-23:T>C	TGCAGAATCTTTGAGATTGCACCTTCTGCAAAGAAGCTGTTCTCATTTTTGAAAGATTCAGATGTTCCT	TGCAGAATCTTTGAGATTGCACCTTCTGCAAAGAAGCTGTTCTCATTTTTGAAAGATTCAGATGTTCCT	scaffold08799	148258	1	2.2033e-27	Chromosome17	23916404	1	2.4105e-27	23:T>C	23	1	0.361702	0.904255	0.095745	0.638298	0.265957	0.461747	0.173155	0.317451	12.2195	17.3704	1	1	1	1	0	1	1	1	1	1	1	2	1	1	1	1	1	1	2	1	2	2	2	1	2	0
7119869|F|0-11:T>A-11:T>A	TGCAGAATGAATGCCATGCTTCTGCTCATAGAATGTATCTAAAATAATCTATGTCCTCCCTTTTACAGA	TGCAGAATGAATGCCATGCTTCTGCTCATAGAATGTATCTAAAATAATCTATGTCCTCCCTTTTACAGA	scaffold05875	243638	1	7.92447e-27	Chromosome04	26460193	1	8.66972e-27	11:T>A	11	1	1	0.148936	0.851064	0	0.148936	0	0.253508	0.126754	23.8305	11.3125	1	0	0	0	0	0	0	2	0	0	0	0	0	0	0	0	0	0	0	0	0	0	0	0	2	0
13855434|F|0-7:T>C-7:T>C	TGCAGAATGAATAGATGCACTAGAAAGCTTTGATGTTTTTGCAGGTATTGACAGATCCAAATGTTTACA	TGCAGAATGAATAGATGCACTAGAAAGCTTTGATGTTTTTGCAGGTATTGACAGATCCAAATGTTTACA	scaffold07430	37193	1	4.73568e-29	Chromosome15	7879608	1	5.18104e-29	7:T>C	7	1	0.989362	0.148936	0.851064	0.010638	0.138298	0.02105	0.253508	0.137279	10.4017	5.77778	1	2	0	0	2	2	0	0	0	0	0	0	0	0	0	0	0	2	0	0	0	0	0	0	0	0
7147152|F|0-9:G>A-9:G>A	TGCAGAATGGCTTTGCTTTTGGGTCCTCCAAGCTCTGGAAAGACTACACTCTTGCTGGCATTGGCTGGA	TGCAGAATGGCTTTGCTTTTGGGTCCTCCAAGCTCTGGAAAGACTACACTCTTGCTGGCATTGGCTGGA	scaffold08446	228574	3	4.73568e-29	Chromosome11	6506122	3	5.18104e-29	9:G>A	9	1	1	0.12766	0.87234	0	0.12766	0	0.222725	0.111363	10.0769	5.46667	1	0	0	0	0	0	0	2	0	0	0	0	2	0	0	0	0	0	0	0	0	2	0	0	0	0
7147135|F|0-18:A>C-18:A>C	TGCAGAATGAGAATTTTCACGAGGGCTAGAGCATGAACTAGAAGGTCCCACATCATTTGCCTCTTCCTG	TGCAGAATGAGAATTTTCACGAGGGCTAGAGCATGAACTAGAAGGTCCCACATCATTTGCCTCTTCCTG	scaffold08316	163251	1	2.2033e-27	Chromosome04	1974587	1	2.4105e-27	18:A>C	18	1	1	0.074468	0.925532	0	0.074468	0	0.137845	0.068923	12.161	6	1	2	0	0	0	0	0	0	0	0	0	0	0	0	0	0	0	0	0	0	0	0	0	0	0	0
7116737|F|0-64:C>G-64:C>G	TGCAGAATGAGGTAAACCTTGTATCTTTTCCCTACATATGGGTCTTTACTCTTTAGTACCTTCTCGGTG	TGCAGAATGAGGTAAACCTTGTATCTTTTCCCTACATATGGGTCTTTACTCTTTAGTACCTTCTCGGTG	scaffold05310	58753	1	2.2033e-27	Chromosome10	12215787	1	2.4105e-27	64:C>G	64	0.861702	0.283951	0.802469	0.197531	0.716049	0.08642	0.406645	0.317025	0.361835	5.23333	5.675	1	0	-	-	1	1	1	0	1	1	1	1	2	1	0	0	1	1	2	1	1	1	0	1	1	2
20471465|F|0-10:T>C-10:T>C	TGCAGAATGATAAAAGGTTGCTGCATAAACCATCACAACTCACATAATACAAACCATTATAGTTCACCG	TGCAGAATGATAAAAGGTTGCTGCATAAACCATCACAACTCACATAATACAAACCATTATAGTTCACCG	scaffold05133	48799	1	4.73568e-29	Chromosome08	286135	1	5.18104e-29	10:T>C	10	0.989362	0.967742	0.204301	0.795699	0.032258	0.172043	0.062435	0.325124	0.19378	5.80357	3.65217	1	0	2	0	2	0	0	0	0	2	0	0	0	0	0	2	0	0	0	0	0	2	0	0	0	2
13855439|F|0-28:G>T-28:G>T	TGCAGAATGATCATCATCAGCTGAAGATGCAGGAGATGATCCAAAATCAAGATTTGGGTAGACTCCAGG	TGCAGAATGATCATCATCAGCTGAAGATGCAGGAGATGATCCAAAATCAAGATTTGGGTAGACTCCAGG	scaffold06708	252398	1	4.73568e-29	Chromosome05	17942262	1	5.18104e-29	28:G>T	28	1	0.946809	0.43617	0.56383	0.053191	0.382979	0.100724	0.491852	0.296288	14.125	10.1053	1	0	0	2	2	2	0	2	0	2	0	2	2	0	1	2	0	2	2	2	2	2	0	2	2	0
13858647|F|0-61:G>A-61:G>A	TGCAGAATGCAAGATGCTCTGCTTCAGGCCAAACTCAAACCGTTACCCGTGAGGCACCAACGATCACAA	TGCAGAATGCAAGATGCTCTGCTTCAGGCCAAACTCAAACCGTTACCCGTGAGGCACCAACGATCACAA	scaffold00889	444957	1	4.73568e-29	Chromosome05	11762717	1	5.18104e-29	61:G>A	61	1	1	0.180851	0.819149	0	0.180851	0	0.296288	0.148144	16.5339	8.7	1	2	0	0	0	2	0	0	0	0	0	0	0	0	2	0	0	0	0	0	0	0	0	0	0	0
7111731|F|0-49:T>A-49:T>A	TGCAGAATGCACCCTTCTTTGTTACCAAGCTTGGAGTCAAAACTTTGCCTTGTGTCATACTATTCAGCT	TGCAGAATGCACCCTTCTTTGTTACCAAGCTTGGAGTCAAAACTTTGCCTTGTGTCATACTATTCAGCT	scaffold06512	358682	2	4.73568e-29	Chromosome02	7282606	2	5.18104e-29	49:T>A	49	1	1	0.212766	0.787234	0	0.212766	0	0.334993	0.167497	23.4491	13.375	1	2	0	0	0	0	0	0	0	0	0	0	0	2	0	0	0	0	0	0	2	0	0	2	0	2
7107083|F|0-59:C>T-59:C>T	TGCAGAATGCACCTCGATTAGGAATCTGTAAATTCTGCACGTGAGTTCTTGAAGGAGCCCGTCTAGGAG	TGCAGAATGCACCTCGATTAGGAATCTGTAAATTCTGCACGTGAGTTCTTGAAGGAGCCCGTCTAGGAG	scaffold05280	398368	1	2.2033e-27	Chromosome02	1649963	1	5.18104e-29	59:C>T	59	1	1	0.170213	0.829787	0	0.170213	0	0.282481	0.14124	14.5169	5.68421	1	0	2	0	2	0	0	0	0	0	0	0	0	0	0	0	0	0	0	0	0	0	0	0	2	0
7107084|F|0-21:T>C-21:T>C	TGCAGAATGCATGAAACACAGTGCATTTTGCAAATTAGTTATAATCTAATTTCTCTTAGCAAGTGCAGT	TGCAGAATGCATGAAACACAGTGCATTTTGCAAATTAGTTATAATCTAATTTCTCTTAGCAAGTGCAGT	scaffold02658	34273	1	2.2033e-27	Chromosome01	32211711	1	2.4105e-27	21:T>C	21	1	0.978723	0.265957	0.734043	0.021277	0.244681	0.041648	0.390448	0.216048	17.9478	13.0714	1	0	2	1	0	0	0	2	0	0	0	0	0	0	0	0	0	0	0	0	0	0	0	0	0	1
7107085|F|0-45:A>T-45:A>T	TGCAGAATGCATGATGAAGTTTATTTTTCTCTCTTTTGTTACATAAATGTATTTACTATAAGCTCCATT	TGCAGAATGCATGATGAAGTTTATTTTTCTCTCTTTTGTTACATAAATGTATTTACTATAAGCTCCATT	scaffold11998	1302659	1	2.2033e-27	Chromosome05	5638995	1	2.4105e-27	45:A>T	45	1	0.797872	0.797872	0.202128	0.202128	0.595745	0.322544	0.322544	0.322544	5.44565	4.70526	1	1	0	1	2	0	2	2	2	2	2	2	2	1	1	1	2	1	2	0	2	1	2	0	2	1
7107086|F|0-24:C>A-24:C>A	TGCAGAATGCCCACTCGTTCGTCCCTTTCATAGTGGAAAGATCCAATACGGCTATAACGCTATCGCACG	TGCAGAATGCCCACTCGTTCGTCCCTTTCATAGTGGAAAGATCCAATACGGCTATAACGCTATCGCACG	scaffold01701	688492	1	4.73568e-29	Chromosome06	23509420	1	5.18104e-29	24:C>A	24	0.989362	0.989247	0.258065	0.741935	0.010753	0.247312	0.021274	0.382934	0.202104	9.03448	5.13793	1	0	0	0	0	0	0	0	0	0	0	2	0	0	2	2	0	0	0	0	0	2	0	2	0	0
13855442|F|0-56:C>T-56:C>T	TGCAGAATGCCCCATTTTGAAGAAGGAAAAAAAACCCAGAATCTCTAATATTCTACCTTCTCCAGCAAT	TGCAGAATGCCCCATTTTGAAGAAGGAAAAAAAACCCAGAATCTCTAATATTCTACCTTCTCCAGCAAT	scaffold03581	901005	1	4.73568e-29	Chromosome05	1940856	1	5.18104e-29	56:C>T	56	1	1	0.031915	0.968085	0	0.031915	0	0.061793	0.030896	16.7288	7.5	1	0	0	0	0	0	0	0	0	0	0	0	0	0	0	0	0	0	0	0	0	2	0	0	0	0
7106773|F|0-46:T>G-46:T>G	TGCAGAATGCTGATAGTACAGAGACAATAAACTTGAAGACTGAAAATGGTGGTCATGTTGGCAGGCACG	TGCAGAATGCTGATAGTACAGAGACAATAAACTTGAAGACTGAAAATGGTGGTCATGTTGGCAGGCACG	scaffold03241	34416	1	4.73568e-29	Chromosome15	5017682	1	5.18104e-29	46:T>G	46	1	0.978723	0.553191	0.446809	0.021277	0.531915	0.041648	0.494341	0.267995	18.5948	12.8281	1	2	2	0	0	2	2	0	2	2	2	0	2	2	0	0	2	2	0	0	0	0	2	0	0	0
7107087|F|0-61:C>G-61:C>G	TGCAGAATGCTGATTCCCTCCCCATACCCATGAGAAAATCTAACCTCCTAATCTCTATCAACAAACTAA	TGCAGAATGCTGATTCCCTCCCCATACCCATGAGAAAATCTAACCTCCTAATCTCTATCAACAAACTAA	scaffold11378	222147	1	2.2033e-27	Chromosome13	4710664	1	2.4105e-27	61:C>G	61	1	0.968085	0.393617	0.606383	0.031915	0.361702	0.061793	0.477365	0.269579	17.9386	11.6222	1	0	1	0	0	0	0	2	0	0	0	0	2	0	2	2	0	0	0	0	0	2	2	0	2	2
7143176|F|0-36:T>A-36:T>A	TGCAGAATGCTGCAACTGTCCTCCACCCATTCCAGGTGCAAAAGTTCCATCAGGATTATCCATTGGTTT	TGCAGAATGCTGCAACTGTCCTCCACCCATTCCAGGTGCAAAAGTTCCATCAGGATTATCCATTGGTTT	scaffold03614	3226029	1	2.2033e-27	Chromosome09	27304376	1	2.4105e-27	36:T>A	36	1	0.382979	0.93617	0.06383	0.617021	0.319149	0.472612	0.119511	0.296062	8.95918	13.6273	1	1	2	0	2	2	1	2	1	2	1	2	2	1	0	2	1	1	2	1	1	2	1	1	2	2
7111736|F|0-63:C>G-63:C>G	TGCAGAATGCTTTCTCTCCCCTGTAACAATTCAATGCAAAAAAAATTTCCAAATTCAATTCCACATTTC	TGCAGAATGCTTTCTCTCCCCTGTAACAATTCAATGCAAAAAAAATTTCCAAATTCAATTCCACATTTC	scaffold10493	328514	1	4.73568e-29	Chromosome16	24966959	1	5.18104e-29	63:C>G	63	1	0.946809	0.542553	0.457447	0.053191	0.489362	0.100724	0.496378	0.298551	10.8482	7.43548	1	1	0	0	0	2	2	0	2	2	2	0	0	0	0	0	2	2	2	0	0	0	0	2	2	0
7122632|F|0-64:C>T-64:C>T	TGCAGAATGCTTTTCAGATAACATATTTCCTGTGGATATGGGTAATGGGATTATTCTCATCAATCTCAT	TGCAGAATGCTTTTCAGATAACATATTTCCTGTGGATATGGGTAATGGGATTATTCTCATCAATCTCAT	scaffold07520	2822785	1	4.73568e-29	Chromosome01	26443257	1	5.18104e-29	64:C>T	64	1	1	0.244681	0.755319	0	0.244681	0	0.369624	0.184812	31.4915	24.0938	1	0	2	2	0	0	0	2	0	0	0	0	2	0	2	2	0	0	2	0	0	2	2	0	0	0
7111740|F|0-17:G>C-17:G>C	TGCAGAATGGCCTCACTGTAAGGTCAAGGCTCAAGAGGAAGAAGCCATAGGATGCCGGGGAGGTTTGGG	TGCAGAATGGCCTCACTGTAAGGTCAAGGCTCAAGAGGAAGAAGCCATAGGATGCCGGGGAGGTTTGGG	scaffold01127	146568	1	4.73568e-29	Chromosome06	23825100	1	5.18104e-29	17:G>C	17	1	0.893617	0.510638	0.489362	0.106383	0.404255	0.190131	0.499774	0.344952	16.3585	13.0167	1	0	0	2	1	2	0	2	0	2	0	2	0	0	2	2	0	0	2	0	0	2	0	2	1	2
13855446|F|0-67:C>G-67:C>G	TGCAGAATGGGTCGGCTTTGGCGTTCGAGGCTGATGAATTTCAAGGCCATCTTCAAGAAAACAATTGCC	TGCAGAATGGGTCGGCTTTGGCGTTCGAGGCTGATGAATTTCAAGGCCATCTTCAAGAAAACAATTGCC	scaffold06512	611737	1	4.73568e-29	Chromosome02	7537063	1	5.18104e-29	67:C>G	67	1	1	0.170213	0.829787	0	0.170213	0	0.282481	0.14124	21.9407	12.1364	1	0	0	2	0	0	0	2	0	2	0	0	2	0	2	0	0	0	0	0	0	2	0	0	0	0
7107089|F|0-42:A>G-42:A>G	TGCAGAATGGTCAAGAGGGCGATGATACAGAATTCATGCACTAGAACCTCAACGGCCCATGAGGCATCA	TGCAGAATGGTCAAGAGGGCGATGATACAGAATTCATGCACTAGAACCTCAACGGCCCATGAGGCATCA	scaffold06550	383945	1	4.73568e-29	Chromosome08	2002800	1	5.18104e-29	42:A>G	42	1	0.925532	0.297872	0.702128	0.074468	0.223404	0.137845	0.418289	0.278067	12.1171	6.44118	1	2	2	0	2	0	0	0	0	2	0	0	0	0	0	2	0	0	0	0	0	2	0	0	0	2
7147156|F|0-24:G>T-24:G>T	TGCAGAATGGTGAGTATTATTTTTGTTTGTCTATGAAAAGTTCTCTTAGTTGGATATTTTGTTCAATGA	TGCAGAATGGTGAGTATTATTTTTGTTTGTCTATGAAAAGTTCTCTTAGTTGGATATTTTGTTCAATGA	scaffold03329	253608	1	4.73568e-29	Chromosome04	20191309	1	5.18104e-29	24:G>T	24	1	1	0.191489	0.808511	0	0.191489	0	0.309642	0.154821	8.87288	4.65217	1	0	0	0	0	0	0	2	0	2	0	0	0	0	2	0	0	0	0	0	0	2	0	0	2	0
7107090|F|0-23:G>T-23:G>T	TGCAGAATGGTTTGTGGGAGGACGAAGTGCTGAAACTGTCGTAATAAACAAGTACATTTTAGGGAAAAT	TGCAGAATGGTTTGTGGGAGGACGAAGTGCTGAAACTGTCGTAATAAACAAGTACATTTTAGGGAAAAT	scaffold03614	1126003	1	4.73568e-29	Chromosome09	25182923	1	5.18104e-29	23:G>T	23	1	0.978723	0.446809	0.553191	0.021277	0.425532	0.041648	0.494341	0.267995	12.579	8.4717	1	1	0	0	2	0	0	2	0	0	0	0	0	2	0	2	0	2	2	0	0	2	1	2	2	2
20493184|F|0-55:G>A-55:G>A	TGCAGAATGTACTGATGACTACTGCAAGGAAGTTCAATGTATTGAAATGGATGAGGCAAGAAGAGATGG	TGCAGAATGTACTGATGACTACTGCAAGGAAGTTCAATGTATTGAAATGGATGAGGCAAGAAGAGATGG	scaffold08765	142525	2	4.73568e-29	Chromosome11	10801739	2	5.18104e-29	55:G>A	55	1	1	0.159574	0.840426	0	0.159574	0	0.268221	0.13411	21.1441	12.2632	1	0	0	0	0	2	0	2	0	0	0	0	2	0	0	0	0	0	0	0	0	2	0	0	0	0
7111742|F|0-10:G>A-10:G>A	TGCAGAATGTGAAATTCAAAAATAGTAATGATAATGAAATAAAAAACAGATCCATAGATGAATTCCATT	TGCAGAATGTGAAATTCAAAAATAGTAATGATAATGAAATAAAAAACAGATCCATAGATGAATTCCATT	scaffold10563	1203709	1	4.73568e-29	Chromosome03	25358109	1	5.18104e-29	10:G>A	10	1	0.968085	0.180851	0.819149	0.031915	0.148936	0.061793	0.296288	0.17904	7.79825	4.68182	1	0	1	0	2	0	0	0	0	2	0	0	2	0	0	2	0	0	0	0	0	0	0	0	0	0
7111745|F|0-36:G>T-36:G>T	TGCAGAATGTGGTTTGCGTCAATGGCAAGGCCAAAAGAGAATATGAATATATTCTTCCCTTTTCCTAAG	TGCAGAATGTGGTTTGCGTCAATGGCAAGGCCAAAAGAGAATATGAATATATTCTTCCCTTTTCCTAAG	scaffold06089	294500	1	2.2033e-27	Chromosome06	25878848	1	2.4105e-27	36:G>T	36	1	0.946809	0.468085	0.531915	0.053191	0.414894	0.100724	0.497963	0.299344	18.3894	11.5769	1	0	2	2	2	2	0	2	0	0	0	0	0	0	0	0	0	0	0	2	0	0	2	0	2	1
7111746|F|0-45:A>T-45:A>T	TGCAGAATGTTCCACTTCCACATCAATTCTTTTTCTCATACTCCCATCTTTTTGTTGCAGGTGCTAGTT	TGCAGAATGTTCCACTTCCACATCAATTCTTTTTCTCATACTCCCATCTTTTTGTTGCAGGTGCTAGTT	scaffold08446	275800	1	4.73568e-29	Chromosome11	6458428	1	5.18104e-29	45:A>T	45	1	0.968085	0.468085	0.531915	0.031915	0.43617	0.061793	0.497963	0.279878	5.36283	3.24528	1	0	2	0	0	0	2	0	2	0	2	0	0	0	0	2	2	1	0	0	0	0	2	2	0	0
7111748|F|0-51:T>A-51:T>A	TGCAGAATGTTGTATAACTGTTGTTTCCTGAGTTGATGAAGATTTCCTGAATATCCATCTTCTTTTTCC	TGCAGAATGTTGTATAACTGTTGTTTCCTGAGTTGATGAAGATTTCCTGAATATCCATCTTCTTTTTCC	scaffold00069	117052	1	4.73568e-29	Chromosome01	6875836	1	5.18104e-29	51:T>A	51	1	0.968085	0.265957	0.734043	0.031915	0.234043	0.061793	0.390448	0.22612	15.1228	10.5	1	2	1	0	0	0	0	0	0	0	0	0	0	0	2	2	0	0	0	0	0	2	0	0	0	2
7111752|F|0-11:A>G-11:A>G	TGCAGAATTACAGTATGCAAAGCATTTGAGTGATAGAAACACACATATTGACTTTGTAAATTTACAGAT	TGCAGAATTACAGTATGCAAAGCATTTGAGTGATAGAAACACACATATTGACTTTGTAAATTTAC	scaffold07859	142744	1	2.65588e-26	Chromosome16	24481061	1	2.83471e-26	11:A>G	11	1	0.904255	0.659574	0.340426	0.095745	0.56383	0.173155	0.449072	0.311114	17.0667	15.039	1	0	0	0	2	0	2	0	2	0	2	1	2	1	2	0	2	2	2	1	1	0	0	2	2	0
7111753|F|0-27:G>A-27:G>A	TGCAGAATTACATTCTGCTGCATGTCAGCACTATCAGCAAAATAAGTTCTACAGCATGAAATTACAGAT	TGCAGAATTACATTCTGCTGCATGTCAGCACTATCAGCAAAATAAGTTCTACAGCATGAAATTAC	scaffold05898	144897	1	1.23566e-24	Chromosome05	19178244	1	1.31886e-24	27:G>A	27	0.978723	0.315217	0.858696	0.141304	0.684783	0.173913	0.431711	0.242675	0.337193	16.9722	18.4748	1	1	2	0	1	2	1	0	1	0	1	1	1	1	1	1	1	1	2	1	1	1	0	1	1	1
7111754|F|0-43:A>C-43:A>C	TGCAGAATTACTGGGGCGCATGATAATAAATCCTGACAACGAAACGTTCCTCCTTCCCTTTGTTCCTCA	TGCAGAATTACTGGGGCGCATGATAATAAATCCTGACAACGAAACGTTCCTCCTTCCCTTTGTTCCTCA	scaffold01551	1101671	1	4.73568e-29	Chromosome15	2611689	1	5.18104e-29	43:A>C	43	1	0.989362	0.297872	0.702128	0.010638	0.287234	0.02105	0.418289	0.21967	14.8803	8.45714	1	2	2	2	2	0	0	2	0	2	0	0	0	0	0	0	0	0	0	0	0	0	0	0	2	0
7107094|F|0-35:C>A-35:C>A	TGCAGAATTAGAGCCTATTGCTGAGGGGACACTTTCTAGTGATGTTGAGCAGCATGGTCATTTGTGTGC	TGCAGAATTAGAGCCTATTGCTGAGGGGACACTTTCTAGTGATGTTGAGCAGCATGGTCATTTGTGTGC	scaffold07520	1834397	2	4.73568e-29	Chromosome01	25470421	2	5.18104e-29	35:C>A	35	1	1	0.234043	0.765957	0	0.234043	0	0.358533	0.179267	13.2373	7.29032	1	0	2	2	0	0	0	2	0	0	0	0	2	0	2	2	0	0	2	0	0	2	2	0	0	0
7147167|F|0-68:C>T-68:C>T	TGCAGAATTAGATGTACTTTCCTCAGCTTCATCAGCATCAGTGGCAGTCAATCTCAATCCTCTACACCC	TGCAGAATTAGATGTACTTTCCTCAGCTTCATCAGCATCAGTGGCAGTCAATCTCAATCCTCTACACCC	scaffold04083	333120	2	4.73568e-29	Chromosome14	5611985	2	5.18104e-29	68:C>T	68	1	1	0.031915	0.968085	0	0.031915	0	0.061793	0.030896	15.5085	8.83333	1	0	0	0	0	0	0	0	0	2	0	0	0	0	0	2	0	0	0	0	0	2	0	0	0	0
7107095|F|0-46:A>C-46:A>C	TGCAGAATTATATTACAAATTTGTCTAAGGTGAAAATTTTGCGGCCACAACAAATTCAGAAGTGCAACG	TGCAGAATTATATTACAAATTTGTCTAAGGTGAAAATTTTGCGGCCACAACAAATTCAGAAGTGCAACG	scaffold04716	275167	1	4.73568e-29	Chromosome15	10096904	1	5.18104e-29	46:A>C	46	1	0.989362	0.180851	0.819149	0.010638	0.170213	0.02105	0.296288	0.158669	27.4274	14.6	1	0	0	0	0	0	0	2	0	0	0	0	0	0	2	0	0	0	2	0	0	0	0	0	0	0
7109629|F|0-42:G>A-42:G>A	TGCAGAATTATCTTCGAGGGATGAATTGAAGCTGTCTTACCTGTCTAATCCTCACCATTCATATGTCTT	TGCAGAATTATCTTCGAGGGATGAATTGAAGCTGTCTTACCTGTCTAATCCTCACCATTCATATGTCTT	scaffold03150	157755	1	4.73568e-29	Chromosome01	26798508	1	5.18104e-29	42:G>A	42	1	1	0.244681	0.755319	0	0.244681	0	0.369624	0.184812	15.5169	7.65625	1	0	2	2	0	0	0	2	0	0	0	0	2	0	2	2	0	0	2	0	0	2	2	0	0	0
7119879|F|0-47:T>G-47:T>G	TGCAGAATTATTCGTGATATTATTCAAAACCACTTATTGCAGGTATATTGAACTGAAATATAACTTACA	TGCAGAATTATTCGTGATATTATTCAAAACCACTTATTGCAGGTATATTGAACTGAAATATAACTTACA	scaffold06697	271982	1	6.12599e-28	Chromosome15	12271072	1	6.7021e-28	47:T>G	47	1	0.957447	0.606383	0.393617	0.042553	0.56383	0.081485	0.477365	0.279425	18.886	15.1429	1	2	0	0	0	0	2	2	2	2	2	0	0	0	0	2	2	0	2	2	2	2	2	0	0	2
7111764|F|0-45:T>A-45:T>A	TGCAGAATTATTGTGAAACAAATTAGTAGAGCACAATAGGCCTACTCTTCAATGCTGCTCAATGGCATG	TGCAGAATTATTGTGAAACAAATTAGTAGAGCACAATAGGCCTACTCTTCAATGCTGCTCAATGGCATG	scaffold07991	586516	1	4.73568e-29	Chromosome01	27368958	1	5.18104e-29	45:T>A	45	1	0.989362	0.297872	0.702128	0.010638	0.287234	0.02105	0.418289	0.21967	6.78632	4.17949	1	0	2	2	2	0	0	2	0	0	0	0	2	0	2	2	0	0	2	0	0	2	2	0	2	0
7111766|F|0-66:G>C-66:G>C	TGCAGAATTCACAATCAACAATGAGAATGTTGCGAGCGCTTCTGAACCATACATTATTCACCAAAAGTA	TGCAGAATTCACAATCAACAATGAGAATGTTGCGAGCGCTTCTGAACCATACATTATTCACCAAAAGTA	scaffold08253	7524	2	4.73568e-29	Chromosome14	12076128	1	2.4105e-27	66:G>C	66	1	1	0.117021	0.882979	0	0.117021	0	0.206655	0.103327	17.7288	6.69231	1	0	0	0	2	0	0	0	0	0	0	0	0	0	0	0	0	0	0	0	0	2	0	0	2	0
7117009|F|0-20:A>T-20:A>T	TGCAGAATTCACTCAGTCAAATAACATGATTCACTGAAAAATCAAAGAGAAAAAGGGAAGGTTACAGAT	TGCAGAATTCACTCAGTCAAATAACATGATTCACTGAAAAATCAAAGAGAAAAAGGGAAGGTTAC	scaffold03234	3328	1	2.65588e-26	Chromosome01	32256071	1	2.83471e-26	20:A>T	20	1	1	0.297872	0.702128	0	0.297872	0	0.418289	0.209144	22.3475	12.8947	1	0	2	0	2	2	0	2	0	0	0	0	2	0	2	0	0	0	2	0	0	2	2	0	2	0
7119614|F|0-50:G>T-50:G>T	TGCAGAATTCATATTATCTGATGCAGTTTCAACAGCACAATTATGAAGAGGCTCTCCTGGCAGGGAAGA	TGCAGAATTCATATTATCTGATGCAGTTTCAACAGCACAATTATGAAGAGGCTCTCCTGGCAGGGAAGA	scaffold03186	212126	1	4.73568e-29	Chromosome18	7122851	1	5.18104e-29	50:G>T	50	1	1	0.053191	0.946809	0	0.053191	0	0.100724	0.050362	13.6271	6.28571	1	0	0	0	2	0	0	0	0	0	0	2	0	0	0	0	0	0	0	0	0	0	0	0	0	0
7147179|F|0-61:C>T-61:C>T	TGCAGAATTCATGATAGAAACTTTTGACTCCATTACATGTCCTTCATTTTCAATGAGGTCACTACTTGT	TGCAGAATTCATGATAGAAACTTTTGACTCCATTACATGTCCTTCATTTTCAATGAGGTCACTACTTGT	scaffold06916	1205724	1	4.73568e-29	Chromosome02	10430281	1	5.18104e-29	61:C>T	61	1	1	0.031915	0.968085	0	0.031915	0	0.061793	0.030896	10.4831	3.6	1	0	0	0	0	0	0	0	0	0	0	2	0	0	0	0	0	2	0	0	0	0	0	0	0	0
7111770|F|0-52:C>G-52:C>G	TGCAGAATTCATTCCAAGAAATCTCTCCTCCAAATCCAGGTGCTTTTTAGCTCTTTCTGTGATAAAATC	TGCAGAATTCATTCCAAGAAATCTCTCCTCCAAATCCAGGTGCTTTTTAGCTCTTTCTGTGATAAAATC	scaffold12091	170542	1	4.73568e-29	Chromosome17	16683375	1	5.18104e-29	52:C>G	52	1	0.978723	0.446809	0.553191	0.021277	0.425532	0.041648	0.494341	0.267995	14.2957	9.40385	1	0	0	0	0	0	2	0	2	0	2	2	0	2	0	0	2	1	0	2	0	0	2	2	0	0
7117010|F|0-46:C>T-46:C>T	TGCAGAATTCCAGTATAAGTTCAGCATGTGATGGCGTCGAAACTACCAAAAATAAATTCCTGCTTTACA	TGCAGAATTCCAGTATAAGTTCAGCATGTGATGGCGTCGAAACTACCAAAAATAAATTCCTGCTTTACA	scaffold06011	334209	1	6.12599e-28	Chromosome05	7532161	1	6.7021e-28	46:C>T	46	1	0.882979	0.382979	0.617021	0.117021	0.265957	0.206655	0.472612	0.339633	16.1863	12.4565	1	2	0	2	1	1	0	2	0	1	0	2	0	0	0	1	0	0	0	0	0	2	0	0	1	0
7119883|F|0-32:T>C-32:T>C	TGCAGAATTCGAAACTGGAATTTTCACCTTCTTTTCTATGAAACATAGCTTATCTTTTGCTCTTACAGA	TGCAGAATTCGAAACTGGAATTTTCACCTTCTTTTCTATGAAACATAGCTTATCTTTTGCTCTTACAGA	scaffold06537	61407	1	7.98074e-22	Chromosome16	4903116	1	8.73127e-22	32:T>C	32	0.978723	0.891304	0.467391	0.532609	0.108696	0.358696	0.193762	0.497873	0.345818	6.38235	5.40351	1	2	0	1	0	2	0	2	0	0	0	2	1	2	2	-	0	2	2	0	2	1	2	0	2	1
7111773|F|0-46:A>G-46:A>G	TGCAGAATTCGTTGTCAGATAAGATGCAAATAGAAGGCACTGAAAAATGCGCAGGATGGGGACTATGAT	TGCAGAATTCGTTGTCAGATAAGATGCAAATAGAAGGCACTGAAAAATGCGCAGGATGGGGACTATGAT	scaffold06145	315778	1	4.73568e-29	Chromosome10	14484056	1	5.18104e-29	46:A>G	46	1	0.914894	0.542553	0.457447	0.085106	0.457447	0.155727	0.496378	0.326053	20.9816	16.9077	1	0	0	0	0	2	2	0	2	0	2	2	2	2	0	0	2	2	2	1	2	2	0	2	0	0
7119884|F|0-67:G>T-67:G>T	TGCAGAATTCTAGGCACCGGCTGATCAATGATGATTTCTTTGAAGGGATAACGTAAAACATCTTGCAGA	TGCAGAATTCTAGGCACCGGCTGATCAATGATGATTTCTTTGAAGGGATAACGTAAAACATCTTGCAGA	scaffold04443	34394	1	4.73568e-29	Chromosome01	691210	1	5.18104e-29	67:G>T	67	1	1	0.117021	0.882979	0	0.117021	0	0.206655	0.103327	25.1017	12.1539	1	0	0	0	0	2	0	0	0	0	0	0	0	0	0	0	0	0	0	0	0	0	2	0	0	0
7119885|F|0-64:A>G-64:A>G	TGCAGAATTCTCAATGGTATCATCATCTTCATGAAGATAAAGCCAGTTTGTACAAATATTTAGCAATTG	TGCAGAATTCTCAATGGTATCATCATCTTCATGAAGATAAAGCCAGTTTGTACAAATATTTAGCAATTG	scaffold04457	355296	1	4.73568e-29	Chromosome01	30783129	1	5.18104e-29	64:A>G	64	1	1	0.319149	0.680851	0	0.319149	0	0.434586	0.217293	24.7797	14.1951	1	0	2	2	2	2	0	2	0	0	0	0	2	0	2	0	0	0	2	0	0	2	2	0	2	0
7143182|F|0-43:C>A-43:C>A	TGCAGAATTCTTCATTCCCTTGCACAGAATATCTCACACGAATCCCATAGGACCACTCGCTAGGCCCAG	TGCAGAATTCTTCATTCCCTTGCACAGAATATCTCACACGAATCCCATAGGACCACTCGCTAGGCCCAG	scaffold12794	748189	1	4.73568e-29	Chromosome06	21631113	1	5.18104e-29	43:C>A	43	1	0.968085	0.5	0.5	0.031915	0.468085	0.061793	0.5	0.280896	7.45614	5.18333	1	0	0	2	2	0	2	2	2	2	2	2	0	0	0	0	2	0	0	1	2	0	0	2	2	1
7117569|F|0-45:G>A-45:G>A	TGCAGAATTCTTTGAAGTCCAGATATTTTTATGTGGTGTAGAAGGGCAGCAAGAAATAAAAGAATTACA	TGCAGAATTCTTTGAAGTCCAGATATTTTTATGTGGTGTAGAAGGGCAGCAAGAAATAAAAGAATTACA	scaffold12794	2169765	1	6.12599e-28	Chromosome06	20190500	1	6.7021e-28	45:G>A	45	1	0.989362	0.191489	0.808511	0.010638	0.180851	0.02105	0.309642	0.165346	38.5214	22.3913	1	0	0	2	2	0	0	2	0	0	0	0	0	0	0	0	0	2	0	0	0	0	0	0	2	1
7107102|F|0-5:A>C-5:A>C	TGCAGAATTGAAGAGATTCTGCAAGCGATTGTATACTGTTGGAAAGAGAGATGCTGAGGGGATTACAGA	TGCAGAATTGAAGAGATTCTGCAAGCGATTGTATACTGTTGGAAAGAGAGATGCTGAGGGGATTACAGA	scaffold12794	2061921	1	7.92447e-27	Chromosome06	20297612	1	8.66972e-27	5:A>C	5	1	0.968085	0.319149	0.680851	0.031915	0.287234	0.061793	0.434586	0.248189	18.7913	11.4444	1	0	2	2	2	0	0	2	0	0	0	0	2	0	0	0	0	0	0	0	0	0	0	0	2	1
7111778|F|0-38:C>T-38:C>T	TGCAGAATTGATTTTCCTTTTTGTGTTTTGAGGTCTGACGCTTACGTGATGAAATGTTGAAGTGAGACA	TGCAGAATTGATTTTCCTTTTTGTGTTTTGAGGTCTGACGCTTACGTGATGAAATGTTGAAGTGAGACA	scaffold02196	69696	1	2.2033e-27	Chromosome04	25145180	1	2.4105e-27	38:C>T	38	0.861702	0.938272	0.197531	0.802469	0.061728	0.135802	0.115836	0.317025	0.21643	5.50515	4.83333	1	0	0	0	2	-	0	0	0	0	0	0	0	0	0	0	0	0	0	0	0	2	-	0	0	2
13861880|F|0-15:T>G-15:T>G	TGCAGAATTGCCCATTGTAACTTCTGATTGTGAAGATAATGATAGTGAGCAGCATGTAGAATCTTTACA	TGCAGAATTGCCCATTGTAACTTCTGATTGTGAAGATAATGATAGTGAGCAGCATGTAGAATCTTTACA	scaffold03614	3501863	1	1.32604e-24	Chromosome09	27587116	1	1.45075e-24	15:T>G	15	1	0.93617	0.425532	0.574468	0.06383	0.361702	0.119511	0.488909	0.30421	32.2182	21.2041	1	0	0	0	2	0	2	0	2	0	2	2	0	1	0	0	2	0	0	0	0	0	2	1	0	0
20485028|F|0-67:A>T-67:A>T	TGCAGAATTGGCAAATATTTTGTAGCAGCAATATTGACCGAGAATCAGGCAAAGCCCATGCAGCAGCAT	TGCAGAATTGGCAAATATTTTGTAGCAGCAATATTGACCGAGAATCAGGCAAAGCCCATGCAGCAGCAT	scaffold03410	135999	1	4.73568e-29	Chromosome14	5178891	1	5.18104e-29	67:A>T	67	1	1	0.031915	0.968085	0	0.031915	0	0.061793	0.030896	17.4746	10.8333	1	0	0	0	0	0	0	0	0	2	0	0	0	0	0	2	0	0	0	0	0	2	0	0	0	0
7124119|F|0-31:A>G-31:A>G	TGCAGAATTGGCTTTAGCTGTTGAGAAACATATTCTGGATTCTGGTTCAATCGATACTGTTGGTACAGT	TGCAGAATTGGCTTTAGCTGTTGAGAAACATATTCTGGATTCTGGTTCAATCGATACTGTTGGTACAGT	scaffold10563	553000	1	2.2033e-27	Chromosome03	26026825	1	2.4105e-27	31:A>G	31	1	0.712766	0.851064	0.148936	0.287234	0.56383	0.409461	0.253508	0.331485	21.7143	23.3434	1	1	2	2	1	0	2	2	2	1	2	0	1	0	1	2	2	1	0	2	2	2	2	0	1	1
7111784|F|0-40:A>G-40:A>G	TGCAGAATTGTGATCTGCCTCCACCTGTGAAGGTGTTTTCAGGGTGGGATACGACGGTCATCTCACCGG	TGCAGAATTGTGATCTGCCTCCACCTGTGAAGGTGTTTTCAGGGTGGGATACGACGGTCATCTCACCGG	scaffold08261	280735	1	4.73568e-29	Chromosome13	21205629	1	5.18104e-29	40:A>G	40	1	1	0.117021	0.882979	0	0.117021	0	0.206655	0.103327	5.59322	2.57143	1	2	2	0	0	0	0	0	0	0	0	0	0	0	2	0	0	0	0	0	0	0	0	0	0	2
20476855|F|0-16:C>T-16:C>T	TGCAGAATTGTTGAAGCCCTAGGATCTGAATCCGAACCGTACTGTAAAGTGGGTCCGTTGAGAGCGTCG	TGCAGAATTGTTGAAGCCCTAGGATCTGAATCCGAACCGTACTGTAAAGTGGGTCCGTTGAGAGCGTCG	scaffold06968	29937	1	4.73568e-29	Chromosome13	7264281	1	5.18104e-29	16:C>T	16	0.946809	0.966292	0.089888	0.910112	0.033708	0.05618	0.065143	0.163616	0.114379	4.66972	3	1	0	0	0	2	0	0	0	0	0	0	0	0	0	0	2	0	0	0	0	0	0	0	0	0	0
7125636|F|0-19:T>G-19:T>G	TGCAGAATTTAGATCCAACTTACACATACTTATGCAAACATTGATATACGGATACAAGACACAATACAT	TGCAGAATTTAGATCCAACTTACACATACTTATGCAAACATTGATATACGGATACAAGACACAATACAT	scaffold03484	53897	1	4.73568e-29	Chromosome18	3626266	1	5.18104e-29	19:T>G	19	0.914894	0.953488	0.093023	0.906977	0.046512	0.046512	0.088697	0.16874	0.128718	14.5882	13.2	1	-	0	0	0	0	0	0	0	0	0	-	0	0	0	1	0	-	2	0	0	0	0	0	0	1
7111789|F|0-20:T>C-20:T>C	TGCAGAATTTATTATCTTATTGATTGGTTTTGCATTTTTTGCATTTCTCTCTTGTTCCAGGACTTCATA	TGCAGAATTTATTATCTTATTGATTGGTTTTGCATTTTTTGCATTTCTCTCTTGTTCCAGGACTTCATA	scaffold06598	73138	1	4.73568e-29	Chromosome16	736623	1	5.18104e-29	20:T>C	20	0.978723	0.956522	0.315217	0.684783	0.043478	0.271739	0.083176	0.431711	0.257443	6.73874	10.9412	1	0	2	2	0	2	0	0	0	0	0	2	0	0	2	0	0	0	0	0	0	0	0	0	0	2
7147198|F|0-46:T>G-46:T>G	TGCAGAATTTATTGAAGGAGGTCTCATTGTGAAGAATTTTATTGTTTCATTTGAAGCAGTTATTGGTAG	TGCAGAATTTATTGAAGGAGGTCTCATTGTGAAGAATTTTATTGTTTCATTTGAAGCAGTTATTGGTAG	scaffold10797	205294	1	4.73568e-29	Chromosome04	26005711	1	5.18104e-29	46:T>G	46	1	0.978723	0.382979	0.617021	0.021277	0.361702	0.041648	0.472612	0.25713	9.37931	6.56818	1	0	0	0	0	0	2	0	2	2	2	0	0	2	0	0	2	2	0	2	0	0	0	0	0	0
13856807|F|0-61:T>A-61:T>A	TGCAGAATTTCACAGTTATTTATGGCTTCCATTCATCCCTTTAGTGGTAAGAAAAAAAAAATTCATCGG	TGCAGAATTTCACAGTTATTTATGGCTTCCATTCATCCCTTTAGTGGTAAGAAAAAAAAAATTCATCGG	scaffold11784	103752	1	2.87038e-21	Chromosome16	3633904	1	3.14032e-21	61:T>A	61	0.882979	0.975904	0.060241	0.939759	0.024096	0.036145	0.047031	0.113224	0.080128	9.46602	7	1	0	0	0	0	0	0	0	0	0	0	0	0	-	0	0	0	0	0	0	0	0	-	0	0	0
7111792|F|0-36:T>G-36:T>G	TGCAGAATTTCAGCCATTATATATTACAGCAGCGAATTGAAACTACTGCATCTGTTTTGTTAGGCTGAG	TGCAGAATTTCAGCCATTATATATTACAGCAGCGAATTGAAACTACTGCATCTGTTTTGTTAGGCTGAG	scaffold10632	18377	1	4.73568e-29	Chromosome14	10434608	1	5.18104e-29	36:T>G	36	1	0.989362	0.287234	0.712766	0.010638	0.276596	0.02105	0.409461	0.215256	14.5	9.06061	1	0	0	0	0	0	0	0	0	2	0	0	1	2	0	0	0	2	0	0	0	0	2	2	0	0
7147199|F|0-10:C>T-10:C>T	TGCAGAATTTCCAGGTCCAAATGCTTATTCTACACCATCCCAGAAGAAGAATTCAATGGCTGCAATGAG	TGCAGAATTTCCAGGTCCAAATGCTTATTCTACACCATCCCAGAAGAAGAATTCAATGGCTGCAATGAG	scaffold02080	160654	1	4.73568e-29	Chromosome18	3316014	1	5.18104e-29	10:C>T	10	1	1	0.095745	0.904255	0	0.095745	0	0.173155	0.086578	18.9661	10.8182	1	0	0	0	0	0	0	0	0	0	0	0	0	0	0	2	0	0	2	0	0	0	0	0	0	2
20485036|F|0-15:A>G-15:A>G	TGCAGAATTTCCATAAGAATTAGTTTTTGAAGAAACCTTTTTCATTCAACGTCAATATTTGTTGGCTAT	TGCAGAATTTCCATAAGAATTAGTTTTTGAAGAAACCTTTTTCATTCAACGTCAATATTTGTTGGCTAT	scaffold06107	13110	1	4.73568e-29	Chromosome12	4237788	1	5.18104e-29	15:A>G	15	1	0.989362	0.06383	0.93617	0.010638	0.053191	0.02105	0.119511	0.070281	8.57265	3.14286	1	0	0	0	0	0	0	0	0	0	0	0	0	0	0	0	0	0	0	0	0	0	2	0	0	0
7111793|F|0-5:A>T-5:A>T	TGCAGAATTTCCTGCCCCTCGCTGAGAGCAGAATGGACTTCCCACTTTCTGAAACCGAAACGCTGCATT	TGCAGAATTTCCTGCCCCTCGCTGAGAGCAGAATGGACTTCCCACTTTCTGAAACCGAAACGCTGCATT	scaffold08368	103554	1	2.2033e-27	Chromosome09	20071148	1	2.4105e-27	5:A>T	5	1	0.861702	0.712766	0.287234	0.138298	0.574468	0.238343	0.409461	0.323902	4.47525	4.11905	1	0	0	0	2	2	2	0	2	1	2	0	2	2	0	0	2	2	2	2	1	2	1	2	1	2
7109817|F|0-18:G>A-18:G>A	TGCAGAATTTCGTGACACGATCTGTCATAGATACCCTCAATATTTTAGAGTTGTTGCAACTGAGAGGGG	TGCAGAATTTCGTGACACGATCTGTCATAGATACCCTCAATATTTTAGAGTTGTTGCAACTGAGAGGGG	scaffold02658	328552	1	4.73568e-29	Chromosome01	32507543	1	5.18104e-29	18:G>A	18	1	1	0.297872	0.702128	0	0.297872	0	0.418289	0.209144	16.2119	10.6053	1	0	2	0	2	2	0	2	0	0	0	0	2	0	2	0	0	0	2	0	0	2	2	0	2	0
7107108|F|0-66:G>T-66:G>T	TGCAGAATTTCTAGCCAATAGTGCACAGGTTTGAATTTGTGATTGGTTTCATTAGCTTCCTTTTCTGCT	TGCAGAATTTCTAGCCAATAGTGCACAGGTTTGAATTTGTGATTGGTTTCATTAGCTTCCTTTTCTGCT	scaffold05459	50250	1	2.2033e-27	Chromosome14	20030252	1	2.4105e-27	66:G>T	66	0.904255	0.858824	0.317647	0.682353	0.141176	0.176471	0.242491	0.433495	0.337993	22.4565	16.8649	1	0	2	2	1	0	0	2	0	0	0	1	-	0	2	0	0	1	1	0	2	0	2	0	0	0
13858662|F|0-23:A>G-23:A>G	TGCAGAATTTCTCGGGGCAACTAATGCTTCTTATTCCCCACTAACTACAGCACAATAGATTGAAAGAAT	TGCAGAATTTCTCGGGGCAACTAATGCTTCTTATTCCCCACTAACTACAGCACAATAGATTGAAAGAAT	scaffold10365	129190	1	4.73568e-29	Chromosome03	26748109	1	5.18104e-29	23:A>G	23	1	1	0.053191	0.946809	0	0.053191	0	0.100724	0.050362	12.7712	6.4	1	0	0	0	0	0	0	0	0	0	0	0	0	0	0	0	0	0	0	0	0	0	0	0	0	0
7111794|F|0-52:A>C-52:A>C	TGCAGAATTTCTGCTTCCTTCTTTTTTGATCTATTTGCAGAGAAGGGCTTTTACAGCAAAAAGTTTATC	TGCAGAATTTCTGCTTCCTTCTTTTTTGATCTATTTGCAGAGAAGGGCTTTTACAGCAAAAAGTTTATC	scaffold03150	541842	1	4.73568e-29	Chromosome01	27173900	1	5.18104e-29	52:A>C	52	0.989362	1	0.301075	0.698925	0	0.301075	0	0.420858	0.210429	6.42735	3.66667	1	0	2	2	2	0	0	2	0	0	0	0	2	0	2	2	0	0	2	0	0	2	2	0	2	0
7111796|F|0-17:T>C-17:T>C	TGCAGAATTTCTTCGATTTGGAGCAGTATCCTCTGCTCAAGGAACTTGCTCACCGTTTCCAGGTATACT	TGCAGAATTTCTTCGATTTGGAGCAGTATCCTCTGCTCAAGGAACTTGCTCACCGTTTCCAGGTATACT	scaffold10689	210692	1	4.73568e-29	Chromosome10	562533	1	5.18104e-29	17:T>C	17	1	1	0.180851	0.819149	0	0.180851	0	0.296288	0.148144	9.49153	4.43478	1	2	0	2	0	0	0	2	0	0	0	0	2	0	2	0	0	0	0	0	0	0	0	0	2	0
20471534|F|0-44:C>T-44:C>T	TGCAGAATTTGAAAGATGGACAATTTATTTTTTTGAATCTCTGTCCTCATCTAGTGTTCAACAATGTTC	TGCAGAATTTGAAAGATGGACAATTTATTTTTTTGAATCTCTGTCCTCATCTAGTGTTCAACAATGTTC	scaffold10797	36533	1	4.73568e-29	Chromosome04	26171615	1	5.18104e-29	44:C>T	44	1	1	0.159574	0.840426	0	0.159574	0	0.268221	0.13411	18.1271	7.58824	1	0	0	0	0	0	0	2	0	0	0	0	0	0	0	0	0	0	0	0	0	0	0	0	2	0
13858663|F|0-62:G>C-62:G>C	TGCAGAATTTGATATGCTGTGTGGTTGTTGCCATTTTGGGTTTTTGTGGAGTTGTTTCAGTGGAGAAGC	TGCAGAATTTGATATGCTGTGTGGTTGTTGCCATTTTGGGTTTTTGTGGAGTTGTTTCAGTGGAGAAGC	scaffold06512	1959936	1	2.2033e-27	Chromosome02	8919230	1	2.4105e-27	62:G>C	62	1	0.765957	0.851064	0.148936	0.234043	0.617021	0.358533	0.253508	0.306021	13.7222	15.8039	1	2	1	1	2	1	2	1	2	2	2	2	2	2	1	2	2	2	2	2	0	2	1	0	2	1
7117014|F|0-29:G>C-29:G>C	TGCAGAATTTGCATTTGGAGCAGGTTTCTGATCAATAGTACTTGCAACTTCACAACCTTTACAGATCGG	TGCAGAATTTGCATTTGGAGCAGGTTTCTGATCAATAGTACTTGCAACTTCACAACCTTTAC	scaffold03750	89915	1	1.14525e-24	Chromosome11	24719746	1	1.25293e-24	29:G>C	29	1	0.989362	0.234043	0.765957	0.010638	0.223404	0.02105	0.358533	0.189792	30.681	18.5	1	0	0	2	2	0	0	2	0	1	0	0	0	0	0	0	0	0	0	0	0	2	0	0	2	0
20503948|F|0-36:C>T-36:C>T	TGCAGAATTTGGCAGATATTTTAGGAAACTAAGGGTCCCTGTGCTTGTTTGTTTGTGGAACTCTGTGTG	TGCAGAATTTGGCAGATATTTTAGGAAACTAAGGGTCCCTGTGCTTGTTTGTTTGTGGAACTCTGTGTG	scaffold12439	185508	1	4.73568e-29	Chromosome10	1400419	1	5.18104e-29	36:C>T	36	1	1	0.042553	0.957447	0	0.042553	0	0.081485	0.040742	24.2542	11	1	0	0	0	0	0	0	0	0	0	0	0	0	0	0	0	0	0	0	0	2	0	0	0	0	0
7111803|F|0-40:G>A-40:G>A	TGCAGAATTTGTCCTTAGATTCTCGACCAAAGACCTTGGAGATTCCTGAACCCACCAAAAAGGTAATTC	TGCAGAATTTGTCCTTAGATTCTCGACCAAAGACCTTGGAGATTCCTGAACCCACCAAAAAGGTAATTC	scaffold10963	794390	1	2.2033e-27	Chromosome06	27197974	1	2.4105e-27	40:G>A	40	1	0.638298	0.851064	0.148936	0.361702	0.489362	0.461747	0.253508	0.357628	4.44737	4.86139	1	2	0	2	0	2	2	1	2	1	2	1	1	2	2	2	2	2	1	1	2	2	1	1	0	2
20471543|F|0-41:C>T-41:C>T	TGCAGAATTTGTGCATTACTTACAGAGAGCCCATGGAGCTCCAGGGTTTTTGTCCATGCAGCATGGAGG	TGCAGAATTTGTGCATTACTTACAGAGAGCCCATGGAGCTCCAGGGTTTTTGTCCATGCAGCATGGAGG	scaffold11378	183849	1	4.73568e-29	Chromosome13	4748462	1	5.18104e-29	41:C>T	41	1	1	0.06383	0.93617	0	0.06383	0	0.119511	0.059756	18.9402	8.11111	1	0	0	0	2	0	0	0	0	2	0	0	0	0	0	0	0	0	0	0	0	0	0	0	2	0
7107114|F|0-26:T>A-26:T>A	TGCAGAATTTTACTTGCAATTACCCCTAATACGCAAACCAAAGCCTCTGATTCTCTTTTATGATCATTG	TGCAGAATTTTACTTGCAATTACCCCTAATACGCAAACCAAAGCCTCTGATTCTCTTTTATGATCATTG	scaffold03750	900153	1	4.73568e-29	Chromosome11	25536692	1	5.18104e-29	26:T>A	26	1	0.93617	0.446809	0.553191	0.06383	0.382979	0.119511	0.494341	0.306926	15.8454	11.6792	1	2	0	0	2	2	0	2	0	1	0	0	2	0	1	0	0	0	0	2	0	2	2	0	2	2
20485045|F|0-14:C>T-14:C>T	TGCAGAATTTTATACCTTGTTCCATAATAATGAGTTCCTTGCTAACCATAATCTCCATGCATAGACCAT	TGCAGAATTTTATACCTTGTTCCATAATAATGAGTTCCTTGCTAACCATAATCTCCATGCATAGACCAT	scaffold03614	1299581	9	2.21894e-22	Chromosome08	11999029	7	2.42762e-22	14:C>T	14	0.882979	0.927711	0.168675	0.831325	0.072289	0.096386	0.134127	0.280447	0.207287	4.54737	2.9	1	1	-	1	0	0	0	2	0	0	0	0	1	0	0	0	0	1	2	-	0	0	0	0	0	0
7122643|F|0-47:G>T-47:G>T	TGCAGAATTTTGAAATCTAATAAAATGGTAATGTCCTTCCTATCCATGCATATTTCATTTTTTTACAGA	TGCAGAATTTTGAAATCTAATAAAATGGTAATGTCCTTCCTATCCATGCATATTTCATTTTTTTACAGA	scaffold10173	582969	2	7.92447e-27	Chromosome15	10607244	2	8.66972e-27	47:G>T	47	0.946809	0.988764	0.157303	0.842697	0.011236	0.146067	0.022219	0.265118	0.143669	17.1091	9.05882	1	1	0	0	0	2	0	0	0	0	0	0	0	-	0	0	0	0	0	0	2	0	0	0	0	0
7125646|F|0-59:G>A-59:G>A	TGCAGAATTTTGCTGCGACTTCTTGAGAACTTTGAAATCAAATTTGAGAGAAAATGACCGACTATTACA	TGCAGAATTTTGCTGCGACTTCTTGAGAACTTTGAAATCAAATTTGAGAGAAAATGACCGACTATTACA	scaffold08359	860822	1	6.12599e-28	Chromosome14	7514922	1	6.7021e-28	59:G>A	59	1	1	0.06383	0.93617	0	0.06383	0	0.119511	0.059756	22.1102	11.7143	1	0	0	0	0	0	0	0	0	0	0	0	2	0	0	0	0	0	0	0	0	0	0	0	0	0
7111808|F|0-54:A>G-54:A>G	TGCAGAATTTTGTAGATCATGTGGCAACTTTTTTGCATCCATGTGAGTACTTGAATGGCAATGGTGGCA	TGCAGAATTTTGTAGATCATGTGGCAACTTTTTTGCATCCATGTGAGTACTTGAATGGCAATGGTGGCA	scaffold03581	1516894	1	2.2033e-27	Chromosome05	2557412	1	2.4105e-27	54:A>G	54	1	0.468085	0.87234	0.12766	0.531915	0.340426	0.497963	0.222725	0.360344	9.72727	11.3689	1	1	1	1	0	0	1	1	1	2	1	1	1	2	1	2	1	1	2	2	2	1	2	2	0	2
7128240|F|0-41:G>T-41:G>T	TGCAGAATTTTGTTTGATTGCAAGCTGAATGAAATTACACAGATCTTTTGGGGTTTGTGTCATAAATTT	TGCAGAATTTTGTTTGATTGCAAGCTGAATGAAATTACACAGATCTTTTGGGGTTTGTGTCATAAATTT	scaffold10070	19321	1	4.73568e-29	Chromosome06	5086884	1	5.18104e-29	41:G>T	41	0.808511	0.828947	0.197368	0.802632	0.171053	0.026316	0.283587	0.316828	0.300208	11.4683	10.0526	1	0	0	-	0	1	0	1	0	0	0	0	1	0	-	0	0	0	0	-	-	2	-	0	0	0
7111810|F|0-28:G>A-28:G>A	TGCAGAATTTTTATCTCAGCCGTTGTACGTGCATCTTGCTAAAACATCGAACTTCTCATGACTCCCGAG	TGCAGAATTTTTATCTCAGCCGTTGTACGTGCATCTTGCTAAAACATCGAACTTCTCATGACTCCCGAG	scaffold09876	756288	1	4.73568e-29	Chromosome14	3515316	1	5.18104e-29	28:G>A	28	1	0.93617	0.62766	0.37234	0.06383	0.56383	0.119511	0.467406	0.293459	10	7.38667	1	0	0	0	1	2	2	0	2	2	2	2	2	2	0	0	2	2	2	2	2	0	2	0	1	0
7125650|F|0-49:T>C-49:T>C	TGCAGAATTTTTCTAAGGAAATATCTGGCATTTAGCTTCTCCAAGAAGCTTCATTTTCTGTCTACACAT	TGCAGAATTTTTCTAAGGAAATATCTGGCATTTAGCTTCTCCAAGAAGCTTCATTTTCTGTCTACACAT	scaffold12414	101068	1	4.73568e-29	Chromosome14	23055595	1	5.18104e-29	49:T>C	49	1	1	0.042553	0.957447	0	0.042553	0	0.081485	0.040742	26.0254	9.2	1	0	0	0	0	0	0	0	0	0	0	2	0	0	0	0	0	0	0	0	0	0	0	0	0	0
20471550|F|0-22:A>G-22:A>G	TGCAGAATTTTTTAGTCTTGTTATGGTGTTCATATTTTGGCAGGTTTAGTTTTGATATTTGATAAACAC	TGCAGAATTTTTTAGTCTTGTTATGGTGTTCATATTTTGGCAGGTTTAGTTTTGATATTTGATAAACAC	scaffold05094	17859	1	4.73568e-29	Chromosome11	17137723	1	5.18104e-29	22:A>G	22	0.989362	1	0.139785	0.860215	0	0.139785	0	0.24049	0.120245	18.7521	10.0625	1	0	0	0	0	0	0	2	0	0	0	0	2	0	0	0	0	0	0	0	0	2	0	0	0	0
7143189|F|0-19:G>A-19:G>A	TGCAGAATTTTTTCAATATGTTTATGAGACTATGTCAGTCAATAATCAACCTCCTCACAAAGAAGAAAC	TGCAGAATTTTTTCAATATGTTTATGAGACTATGTCAGTCAATAATCAACCTCCTCACAAAGAAGAAAC	scaffold02915	123752	1	4.73568e-29	Chromosome04	23695437	1	5.18104e-29	19:G>A	19	1	1	0.223404	0.776596	0	0.223404	0	0.34699	0.173495	10.4068	4.37037	1	0	0	0	0	2	0	2	0	2	0	0	0	0	2	0	0	0	0	0	0	0	2	0	2	0
7107118|F|0-13:G>T-13:G>T	TGCAGACAAAAAAGAAAATTCAAAATACAGGGACCATATCATATTTAGATGAAAAGTCAGGGATTACAG	TGCAGACAAAAAAGAAAATTCAAAATACAGGGACCATATCATATTTAGATGAAAAGTCAGGGATTACAG	scaffold06814	503404	1	2.2033e-27	Chromosome02	15404859	1	2.4105e-27	13:G>T	13	0.968085	0.604396	0.703297	0.296703	0.395604	0.307692	0.478203	0.417341	0.447772	9.61429	8.5375	1	2	0	2	0	2	1	0	1	0	1	1	2	1	2	1	1	1	2	0	0	2	0	1	0	0
13855463|F|0-11:C>T-11:C>T	TGCAGACAAAACATATTAGAACTTTCAGATTTATGGAAAAACAAGGTCATGTGCTCATACATTACAGAT	TGCAGACAAAACATATTAGAACTTTCAGATTTATGGAAAAACAAGGTCATGTGCTCATACATTAC	scaffold03614	377016	1	2.65588e-26	Chromosome09	24422381	1	2.83471e-26	11:C>T	11	1	0.989362	0.255319	0.744681	0.010638	0.244681	0.02105	0.380263	0.200656	28.8291	15.3571	1	0	0	0	2	0	0	0	0	0	0	0	0	0	2	0	0	0	0	0	0	2	2	0	0	2
7111813|F|0-11:T>C-11:T>C	TGCAGACAAAATCAAGATGAAAGTGAGAGTGGAGAAAATGATGAAGATGGAAACAAGGTTACAGATCGG	TGCAGACAAAATCAAGATGAAAGTGAGAGTGGAGAAAATGATGAAGATGGAAACAAGGTTAC	scaffold05629	38524	1	1.14525e-24	Chromosome09	23225885	1	1.25293e-24	11:T>C	11	1	1	0.106383	0.893617	0	0.106383	0	0.190131	0.095066	27.0847	13.5833	1	0	0	0	0	0	0	0	0	0	0	0	0	0	2	0	0	0	0	0	0	2	0	0	0	2
7147225|F|0-21:A>G-21:A>G	TGCAGACAAAATCGCAGAGAAATATATTTTTTCTTTTATAGGAAAGGTAGAAGTAAAATTATTTATTCA	TGCAGACAAAATCGCAGAGAAATATATTTTTTCTTTTATAGGAAAGGTAGAAGTAAAATTATTTATTCA	scaffold02080	114739	1	4.73568e-29	Chromosome18	3265002	1	5.18104e-29	21:A>G	21	1	1	0.106383	0.893617	0	0.106383	0	0.190131	0.095066	10.5	6.58333	1	0	0	0	0	0	0	0	0	0	0	0	0	0	0	2	0	0	2	0	0	0	0	0	0	2
7111814|F|0-46:A>C-46:A>C	TGCAGACAAAATTATGCAAATCTCAAATCAAACAAGACAACCACCAAAATTTACATCTCTATTATGACA	TGCAGACAAAATTATGCAAATCTCAAATCAAACAAGACAACCACCAAAATTTACATCTCTATTATGACA	scaffold10963	584428	1	2.2033e-27	Chromosome06	26943743	1	2.4105e-27	46:A>C	46	1	0.989362	0.265957	0.734043	0.010638	0.255319	0.02105	0.390448	0.205749	10.9915	6.33333	1	0	0	2	0	0	0	2	0	0	0	0	0	0	0	0	0	0	0	0	0	0	0	0	0	0
7111816|F|0-25:A>T-25:A>T	TGCAGACAAACTTACTTGATAGGTCAAGGATTAGAAAATGGATACTTGATTGTTGCTTTGCATCTTCTT	TGCAGACAAACTTACTTGATAGGTCAAGGATTAGAAAATGGATACTTGATTGTTGCTTTGCATCTTCTT	scaffold00318	410259	1	4.73568e-29	Chromosome17	21654202	1	5.18104e-29	25:A>T	25	1	1	0.37234	0.62766	0	0.37234	0	0.467406	0.233703	23.2797	13.9545	1	0	0	0	0	2	2	0	2	0	2	0	0	2	0	0	2	2	0	2	2	0	0	0	0	0
7111819|F|0-66:T>C-66:T>C	TGCAGACAAAGAGAAAGCCAGTTCAGTTGCCAAGATCAAAGTTGTGGTATGCTTCCCTTTCTTTGCTCT	TGCAGACAAAGAGAAAGCCAGTTCAGTTGCCAAGATCAAAGTTGTGGTATGCTTCCCTTTCTTTGCTCT	scaffold04324	186878	1	2.2033e-27	Chromosome11	4077450	1	2.4105e-27	66:T>C	66	1	0.648936	0.893617	0.106383	0.351064	0.542553	0.455636	0.190131	0.322884	13.1081	14.4808	1	1	2	1	1	1	2	1	2	1	2	0	1	0	2	1	2	2	2	0	0	1	1	2	1	1
7147230|F|0-59:C>T-59:C>T	TGCAGACAAATAAATCTCAGATTTTCCTGAAAAAGCTGTATCTATCTTCCCTCCCACAACCCATTTCAG	TGCAGACAAATAAATCTCAGATTTTCCTGAAAAAGCTGTATCTATCTTCCCTCCCACAACCCATTTCAG	scaffold07575	251559	1	2.2033e-27	Chromosome05	21268604	1	2.4105e-27	59:C>T	59	1	1	0.095745	0.904255	0	0.095745	0	0.173155	0.086578	6.36752	4	1	0	0	0	0	0	0	0	0	2	0	0	0	0	0	2	0	0	0	0	0	0	0	0	0	0
7111822|F|0-59:G>T-59:G>T	TGCAGACAAATACACTGTTCCATATCTGATATAGAAACCTTTTGAGCAGCACATAGAAAGCATGTAAAA	TGCAGACAAATACACTGTTCCATATCTGATATAGAAACCTTTTGAGCAGCACATAGAAAGCATGTAAAA	scaffold00752	96766	1	4.73568e-29	Chromosome06	15871079	1	5.18104e-29	59:G>T	59	1	0.808511	0.659574	0.340426	0.191489	0.468085	0.309642	0.449072	0.379357	8.57732	9.37662	1	2	2	0	0	1	2	0	2	2	2	2	2	1	0	0	2	2	1	2	2	0	0	0	0	1
7111823|F|0-27:C>T-27:C>T	TGCAGACAAATGAAATATTTGGATATACATAACTAGCATAGTGGAAAGGGCTCCAAAGAAAGATACCTT	TGCAGACAAATGAAATATTTGGATATACATAACTAGCATAGTGGAAAGGGCTCCAAAGAAAGATACCTT	scaffold04450	410732	1	7.92447e-27	Chromosome01	34566244	1	8.66972e-27	27:C>T	27	0.968085	0.978022	0.307692	0.692308	0.021978	0.285714	0.04299	0.426036	0.234513	14.7477	8.27027	1	0	2	0	2	2	0	2	0	0	0	0	0	0	2	0	0	0	2	-	0	2	2	-	2	0
7107124|F|0-34:A>C-34:A>C	TGCAGACAAATGAATAATTCAGAGCCAAGAGGTCAAAGCTCCCTCTTCCCAGGCCATGAAACTATACAT	TGCAGACAAATGAATAATTCAGAGCCAAGAGGTCAAAGCTCCCTCTTCCCAGGCCATGAAACTATACAT	scaffold05875	899182	1	2.2033e-27	Chromosome04	27119148	1	2.4105e-27	34:A>C	34	1	0.829787	0.808511	0.191489	0.170213	0.638298	0.282481	0.309642	0.296062	10.46	10.5213	1	2	0	2	0	1	2	2	2	2	2	2	0	2	2	0	2	1	2	2	0	2	2	0	2	0
7111825|F|0-8:A>C-8:A>C	TGCAGACAAATTGACTAAGCTTGTGGTGAAGTTGATGCTGATTGAAACAGATATTATGCCTCAGGGTTG	TGCAGACAAATTGACTAAGCTTGTGGTGAAGTTGATGCTGATTGAAACAGATATTATGCCTCAGGGTTG	scaffold03363	254249	1	4.73568e-29	Chromosome13	23950446	1	5.18104e-29	8:A>C	8	1	1	0.12766	0.87234	0	0.12766	0	0.222725	0.111363	18.2797	9.375	1	2	2	0	0	0	0	0	0	0	0	0	0	0	2	0	0	0	0	0	0	0	0	2	0	2
7111826|F|0-12:A>G-12:A>G	TGCAGACAACACAGTAACAATGACAAAAATTCCCAGATTGGATTGGATTTGTGAGAGAAAACATTCAAT	TGCAGACAACACAGTAACAATGACAAAAATTCCCAGATTGGATTGGATTTGTGAGAGAAAACATTCAAT	scaffold06591	229371	1	4.73568e-29	Chromosome09	5179871	1	5.18104e-29	12:A>G	12	1	1	0.031915	0.968085	0	0.031915	0	0.061793	0.030896	12.4661	4.33333	1	0	0	0	0	0	0	0	0	0	0	0	0	0	0	0	0	0	0	0	0	0	0	0	0	0
7147233|F|0-6:C>T-6:C>T	TGCAGACAACAGGAGATTCCGGTGAGTCTCCGATCTCTTATCACTATCTTCAATATTTGATGATGAGGT	TGCAGACAACAGGAGATTCCGGTGAGTCTCCGATCTCTTATCACTATCTTCAATATTTGATGATGAGGT	scaffold10045	401861	1	1.03237e-20	Chromosome11	24145606	1	1.12946e-20	6:C>T	6	0.968085	0.956044	0.417582	0.582418	0.043956	0.373626	0.084048	0.486415	0.285231	12.2222	8.10638	1	0	-	0	0	0	2	0	2	0	2	1	0	2	0	0	2	2	0	0	2	0	0	1	0	0
7147237|F|0-66:C>T-66:C>T	TGCAGACAACGTCTGTATTCACAATGTATTCTGCGATTTTGAGCTCTTCATAAAGTAAATGTGATACCG	TGCAGACAACGTCTGTATTCACAATGTATTCTGCGATTTTGAGCTCTTCATAAAGTAAATGTGATACCG	scaffold07351	50841	2	4.73568e-29	Chromosome11	2721382	2	5.18104e-29	66:C>T	66	1	1	0.053191	0.946809	0	0.053191	0	0.100724	0.050362	11.7458	8.42857	1	0	0	0	0	0	0	0	0	2	0	0	0	0	0	0	0	0	0	0	0	0	2	0	0	2
7142363|F|0-40:T>C-40:T>C	TGCAGACAACTACGTGGGTCCAATTTGTGTAGTATTTTGCTACAAAACATCAAAATTCAATTTTACAGA	TGCAGACAACTACGTGGGTCCAATTTGTGTAGTATTTTGCTACAAAACATCAAAATTCAATTTTACAGA	scaffold09294	189293	1	7.92447e-27	Chromosome06	4571450	1	8.66972e-27	40:T>C	40	0.978723	1	0.032609	0.967391	0	0.032609	0	0.063091	0.031545	25.6	8.66667	1	0	0	0	0	0	0	0	0	0	0	0	0	0	0	0	0	0	0	0	0	0	0	0	-	0
7119898|F|0-33:T>C-33:T>C	TGCAGACAACTATGAAAAATACACCCATTTCATTGGAAACACCATCAGCTGGTGATTTTGGAATACAAG	TGCAGACAACTATGAAAAATACACCCATTTCATTGGAAACACCATCAGCTGGTGATTTTGGAATACAAG	scaffold02401	23312	1	2.2033e-27	Chromosome11	16204973	1	2.4105e-27	33:T>C	33	1	0.680851	0.946809	0.053191	0.319149	0.62766	0.434586	0.100724	0.267655	14.4198	18.7027	1	1	1	2	2	1	2	2	2	0	2	2	2	2	2	1	2	2	2	1	1	1	2	2	0	2
20485066|F|0-16:A>G-16:A>G	TGCAGACAACTCACTAATAAAATAAAAATGTTGCAACATGCCGGAAGCTGTTTACGTTCATTGTCTGCT	TGCAGACAACTCACTAATAAAATAAAAATGTTGCAACATGCCGGAAGCTGTTTACGTTCATTGTCTGCT	scaffold04457	894386	1	4.73568e-29	Chromosome01	30254421	1	5.18104e-29	16:A>G	16	1	0.882979	0.138298	0.861702	0.117021	0.021277	0.206655	0.238343	0.222499	4.80392	4.47368	1	0	0	0	1	0	0	0	0	1	0	0	0	0	0	2	0	0	0	2	0	1	0	0	1	0
7111828|F|0-16:A>G-16:A>G	TGCAGACAAGAAAAGGATTCTATGTGTTAGCTCTTTTTTCTTCTTTAGTTGTTTGTGTATTTGCAAGAA	TGCAGACAAGAAAAGGATTCTATGTGTTAGCTCTTTTTTCTTCTTTAGTTGTTTGTGTATTTGCAAGAA	scaffold04043	1291535	1	2.2033e-27	Chromosome02	4397508	1	2.4105e-27	16:A>G	16	1	0.840426	0.5	0.5	0.159574	0.340426	0.268221	0.5	0.38411	6.90816	5.50847	1	0	1	1	2	2	0	1	0	2	0	0	1	0	2	2	0	0	2	0	0	2	0	0	1	0
7146328|F|0-22:G>A-22:G>A	TGCAGACAAGAATTAGTGAACAGTGAATTGTCACCTTTGCCACATAGCCCACAGCAGCAAGACGGACAA	TGCAGACAAGAATTAGTGAACAGTGAATTGTCACCTTTGCCACATAGCCCACAGCAGCAAGACGGACAA	scaffold10673	10458	1	4.73568e-29	Chromosome13	14090157	1	5.18104e-29	22:G>A	22	0.957447	0.977778	0.066667	0.933333	0.022222	0.044444	0.043457	0.124444	0.083951	10.6696	6.42857	1	0	0	0	2	0	0	0	0	0	0	0	0	0	0	0	0	0	0	0	0	0	0	0	0	0
7139133|F|0-28:T>C-28:T>C	TGCAGACAAGCTCAAGGCCTCTATTTTTTCTGCTTCACTTCTGAGAATTGGAGGCTGGGAGGTATTTGC	TGCAGACAAGCTCAAGGCCTCTATTTTTTCTGCTTCACTTCTGAGAATTGGAGGCTGGGAGGTATTTGC	scaffold02915	93516	1	4.73568e-29	Chromosome04	23661895	1	5.18104e-29	28:T>C	28	1	1	0.223404	0.776596	0	0.223404	0	0.34699	0.173495	22.3051	14.5556	1	0	0	0	0	2	0	2	0	2	0	0	0	0	2	0	0	0	0	0	0	0	2	0	2	0
7107127|F|0-31:G>A-31:G>A	TGCAGACAAGGTAAGCCAAGCCTGCTAGTCCGTTTTTCAAATATTGTTGATTAGTAATTCCAATTCACA	TGCAGACAAGGTAAGCCAAGCCTGCTAGTCCGTTTTTCAAATATTGTTGATTAGTAATTCCAATTCACA	scaffold01551	378745	1	4.73568e-29	Chromosome15	3357308	1	5.18104e-29	31:G>A	31	1	0.989362	0.287234	0.712766	0.010638	0.276596	0.02105	0.409461	0.215256	18.5214	11.9722	1	2	0	0	2	0	0	0	0	2	0	2	0	0	0	0	0	2	2	0	2	0	2	0	2	2
7111836|F|0-23:G>A-23:G>A	TGCAGACAAGTGAATACCACAAAGAAGAGCAGTGTAAACTTATACTATTTTTCAAAAAAGGAACTGTAA	TGCAGACAAGTGAATACCACAAAGAAGAGCAGTGTAAACTTATACTATTTTTCAAAAAAGGAACTGTAA	scaffold06825	164480	1	4.73568e-29	Chromosome12	3583727	1	5.18104e-29	23:G>A	23	1	0.978723	0.478723	0.521277	0.021277	0.457447	0.041648	0.499095	0.270371	9.38261	7.36207	1	0	2	2	0	0	2	2	2	2	2	0	0	2	1	0	2	0	0	2	0	0	0	2	2	0
20110243|F|0-14:A>T-14:A>T	TGCAGACAAGTTAGAGCCAGTTTGGTTCTGTGGGGTGATCAAGGTCACCAAAATGGAGCTTCTCAAAAA	TGCAGACAAGTTAGAGCCAGTTTGGTTCTGTGGGGTGATCAAGGTCACCAAAATGGAGCTTCTCAAAAA	scaffold04758	194817	1	4.73568e-29	Chromosome16	14335578	1	5.18104e-29	14:A>T	14	1	1	0.138298	0.861702	0	0.138298	0	0.238343	0.119172	13.0593	6.46667	1	0	0	0	0	0	0	0	0	0	0	2	0	0	0	0	0	2	0	0	0	0	0	0	0	0
7107129|F|0-54:A>T-54:A>T	TGCAGACAATAAAATCTAAAAATGTCTTATTAGCTGTCACACAAAGATAGCCTAATTAGTTTTCTCGCC	TGCAGACAATAAAATCTAAAAATGTCTTATTAGCTGTCACACAAAGATAGCCTAATTAGTTTTCTCGCC	scaffold02572	395396	1	2.2033e-27	Chromosome14	23851829	1	2.4105e-27	54:A>T	54	1	1	0.074468	0.925532	0	0.074468	0	0.137845	0.068923	30.7627	14.125	1	0	0	0	0	0	0	0	0	0	0	0	0	0	0	0	0	0	0	0	0	2	0	0	0	0
7119899|F|0-53:T>C-53:T>C	TGCAGACAATAAAGTCAATTCCTTTAGCACAAATGATCAAAGACAACAAATGCTTTTTACTTATTACAG	TGCAGACAATAAAGTCAATTCCTTTAGCACAAATGATCAAAGACAACAAATGCTTTTTACTTATTACAG	scaffold07520	2445492	1	2.2033e-27	Chromosome01	26071631	1	2.4105e-27	53:T>C	53	1	1	0.234043	0.765957	0	0.234043	0	0.358533	0.179267	30.178	17.4839	1	0	2	2	0	0	0	2	0	0	0	0	2	0	2	2	0	0	2	0	0	2	2	0	0	0
13855465|F|0-51:T>C-51:T>C	TGCAGACAATAAGAAGATAAGTAAACCATATATCACTAAAAACTGTTAGTTTGATGTTATGTAAAGGAA	TGCAGACAATAAGAAGATAAGTAAACCATATATCACTAAAAACTGTTAGTTTGATGTTATGTAAAGGAA	scaffold12498	294429	1	4.76931e-24	Chromosome11	5523265	1	5.21783e-24	51:T>C	51	0.968085	0.879121	0.494505	0.505495	0.120879	0.373626	0.212535	0.49994	0.356237	26.1531	18.4107	1	0	2	0	0	0	2	0	2	0	2	1	0	1	1	0	2	0	-	1	1	0	0	2	0	1
7147252|F|0-8:A>T-8:A>T	TGCAGACAATGGATGAAGCTAGTTTTGCCTACATAAACTTCAAAGTATAACAAATGAAGGAATTTTCAA	TGCAGACAATGGATGAAGCTAGTTTTGCCTACATAAACTTCAAAGTATAACAAATGAAGGAATTTTCAA	scaffold04151	543444	1	4.73568e-29	Chromosome04	24964288	1	5.18104e-29	8:A>T	8	0.978723	1	0.206522	0.793478	0	0.206522	0	0.327741	0.163871	10.3793	8.29167	1	0	0	0	0	2	0	2	0	0	0	0	0	0	2	0	0	0	0	0	0	0	2	0	2	0
7147255|F|0-42:A>T-42:A>T	TGCAGACAATGTAAAATTCCCAAACCTAGCTGTTGCCATTGGAGCAAATCCACCCAGCCCTCCCATGAA	TGCAGACAATGTAAAATTCCCAAACCTAGCTGTTGCCATTGGAGCAAATCCACCCAGCCCTCCCATGAA	scaffold07012	1476844	1	4.73568e-29	Chromosome18	2719505	1	5.18104e-29	42:A>T	42	1	1	0.12766	0.87234	0	0.12766	0	0.222725	0.111363	11.1356	5.92857	1	0	0	0	0	0	0	0	0	0	0	0	0	0	0	0	0	0	0	0	0	2	0	0	2	0
7107132|F|0-55:C>T-55:C>T	TGCAGACAATTGCAATATTCAGACAAAAAGGAAGGTCACTGTATCAGCATGCATACACAACCAGTTTCT	TGCAGACAATTGCAATATTCAGACAAAAAGGAAGGTCACTGTATCAGCATGCATACACAACCAGTTTCT	scaffold07991	31148	1	4.73568e-29	Chromosome01	27917824	1	5.18104e-29	55:C>T	55	1	1	0.297872	0.702128	0	0.297872	0	0.418289	0.209144	9.63559	8.02564	1	0	2	2	2	0	0	2	0	0	0	0	2	0	2	2	0	0	2	0	0	2	2	0	2	0
20471592|F|0-12:A>G-12:A>G	TGCAGACAATTTACTCCGTTCACTAATTAGAAAAAAGGAAGAAAAACTGCAAACTCAGATATGAATTTA	TGCAGACAATTTACTCCGTTCACTAATTAGAAAAAAGGAAGAAAAACTGCAAACTCAGATATGAATTTA	scaffold06327	276163	1	4.73568e-29	Chromosome04	2365567	1	5.18104e-29	12:A>G	12	1	0.989362	0.138298	0.861702	0.010638	0.12766	0.02105	0.238343	0.129697	6.47826	2.52941	1	2	0	0	0	0	0	0	0	2	0	0	0	0	0	2	0	0	0	0	0	2	0	0	0	0
7122644|F|0-35:G>T-35:G>T	TGCAGACAATTTTTCACTCGAACTTTTCAGCACAGGTAGAATAATCAAGCTCCTGTGTTTTGAGAACAT	TGCAGACAATTTTTCACTCGAACTTTTCAGCACAGGTAGAATAATCAAGCTCCTGTGTTTTGAGAACAT	scaffold04305	42518	1	4.73568e-29	Chromosome09	22830322	1	5.18104e-29	35:G>T	35	1	0.989362	0.148936	0.851064	0.010638	0.138298	0.02105	0.253508	0.137279	37.1795	18.7059	1	0	0	2	0	0	0	0	0	0	0	0	0	0	2	0	0	0	0	0	0	2	0	0	0	2
7145914|F|0-30:A>G-30:A>G	TGCAGACACAACCCATAGGTCAAAATATACACAGCTGCTATAGTAACATTCACAAAATTATTTACAGAT	TGCAGACACAACCCATAGGTCAAAATATACACAGCTGCTATAGTAACATTCACAAAATTATTTAC	scaffold05875	648919	1	1.23566e-24	Chromosome04	26866575	1	1.31886e-24	30:A>G	30	0.840426	0.177215	0.949367	0.050633	0.822785	0.126582	0.29162	0.096138	0.193879	24.5	30.6735	1	1	1	1	1	1	1	2	1	1	1	1	1	1	1	1	1	1	1	1	1	1	-	1	2	1
7124302|F|0-36:C>G-36:C>G	TGCAGACACACACACAAAGAAGAATGTTTTGGTTTTCTGGTAACTTCCAGTGGAAACATAGGCAAACAC	TGCAGACACACACACAAAGAAGAATGTTTTGGTTTTCTGGTAACTTCCAGTGGAAACATAGGCAAACAC	scaffold11388	203872	1	2.2033e-27	Chromosome15	5869614	1	2.4105e-27	36:C>G	36	1	0.212766	0.968085	0.031915	0.787234	0.180851	0.334993	0.061793	0.198393	20.4583	34.7826	1	1	1	1	1	2	1	1	1	2	1	1	1	1	1	1	1	2	1	1	1	1	1	2	1	2
7107135|F|0-7:A>C-7:A>C	TGCAGACACATGGAAGGGTAAGATTGATAATTTTTGAAATTTGAGGGGTAAAGGAGGACAAGTTGGGCA	TGCAGACACATGGAAGGGTAAGATTGATAATTTTTGAAATTTGAGGGGTAAAGGAGGACAAGTTGGGCA	scaffold00847	2210230	1	4.73568e-29	Chromosome16	28212197	1	5.18104e-29	7:A>C	7	1	1	0.212766	0.787234	0	0.212766	0	0.334993	0.167497	12.0169	6.28	1	0	0	0	2	0	0	2	0	0	0	0	0	0	0	2	0	0	0	0	0	2	0	0	2	0
7143198|F|0-38:T>C-38:T>C	TGCAGACACATGGATGACATGATCACTCCATGGCAAATTCCTCCATTTATCCACAACACCATCATAATG	TGCAGACACATGGATGACATGATCACTCCATGGCAAATTCCTCCATTTATCCACAACACCATCATAATG	scaffold09809	187302	1	2.2033e-27	Chromosome10	21715421	1	2.4105e-27	38:T>C	38	0.989362	0.634409	0.913978	0.086022	0.365591	0.548387	0.463869	0.157244	0.310556	4.56164	5.58333	1	1	1	1	1	2	2	1	2	2	2	2	1	2	1	1	2	2	2	2	2	1	1	2	0	2
13858681|F|0-8:C>T-8:C>T	TGCAGACACCACATGGAATTCCTTGCTTCTTTATTGAAGGCTCTTCACCCACATTCTCATCTTCAGTGT	TGCAGACACCACATGGAATTCCTTGCTTCTTTATTGAAGGCTCTTCACCCACATTCTCATCTTCAGTGT	scaffold07519	336404	1	4.73568e-29	Chromosome18	8377072	1	5.18104e-29	8:C>T	8	1	1	0.191489	0.808511	0	0.191489	0	0.309642	0.154821	17.6441	8.30435	1	0	0	0	0	0	0	0	0	0	0	2	0	0	0	0	0	0	2	0	0	2	0	2	2	2
7107136|F|0-37:T>C-37:T>C	TGCAGACACCAGCACAAGCAACGACATTCTTCAGGGATGGCCAGGTAGTCTCAGATGCCTCAATTCTCA	TGCAGACACCAGCACAAGCAACGACATTCTTCAGGGATGGCCAGGTAGTCTCAGATGCCTCAATTCTCA	scaffold04457	798080	1	4.73568e-29	Chromosome01	30349121	1	5.18104e-29	37:T>C	37	1	1	0.287234	0.712766	0	0.287234	0	0.409461	0.204731	21.983	13.4865	1	0	2	2	2	0	0	2	0	0	0	0	2	0	2	0	0	0	2	0	0	2	2	0	2	0
7122645|F|0-49:C>T-49:C>T	TGCAGACACCATTGCATTTCTCCCTCTTTTTCCTCCTGTTTATTTCTTTCTCTGCTCCTCCTTTACAGA	TGCAGACACCATTGCATTTCTCCCTCTTTTTCCTCCTGTTTATTTCTTTCTCTGCTCCTCCTTTACAGA	scaffold09880	454672	1	3.6869e-25	Chromosome13	3315710	1	4.03363e-25	49:C>T	49	1	0.829787	0.840426	0.159574	0.170213	0.670213	0.282481	0.268221	0.275351	10.0412	8.78	1	2	2	2	2	0	2	2	2	2	2	1	1	1	2	0	2	2	2	2	2	0	2	1	1	2
20471603|F|0-5:A>G-5:A>G	TGCAGACACCGTATACTTTCACCTACAAGAATGCTCCAAATCTCTATAATTGAAGTTCAATCTCCATTT	TGCAGACACCGTATACTTTCACCTACAAGAATGCTCCAAATCTCTATAATTGAAGTTCAATCTCCATTT		0	0	999	Chromosome02	3873698	1	5.18104e-29	5:A>G	5	1	0.978723	0.265957	0.734043	0.021277	0.244681	0.041648	0.390448	0.216048	12.9914	7.64516	1	0	2	0	0	2	0	0	0	0	0	2	2	0	2	0	0	0	0	0	0	0	2	0	0	0
7107138|F|0-52:C>T-52:C>T	TGCAGACACCTCAAAGAGATGCTGTGTAGCATCTTTGTTGTACAGCAAAAACCGGTGCTCACAAATTTC	TGCAGACACCTCAAAGAGATGCTGTGTAGCATCTTTGTTGTACAGCAAAAACCGGTGCTCACAAATTTC	scaffold04260	146958	1	4.73568e-29	Chromosome05	25803744	1	5.18104e-29	52:C>T	52	1	1	0.042553	0.957447	0	0.042553	0	0.081485	0.040742	8.77966	6	1	0	0	0	2	0	0	0	0	0	0	0	0	0	0	0	0	0	0	0	0	0	0	0	2	0
7110688|F|0-35:C>T-35:C>T	TGCAGACACGGTGAACACTGTGAAGAATTTGAGAGCGATAATGGAAACTGGTGTGGAGCCGTTAGCTTT	TGCAGACACGGTGAACACTGTGAAGAATTTGAGAGCGATAATGGAAACTGGTGTGGAGCCGTTAGCTTT	scaffold08127	45428	1	4.73568e-29	Chromosome16	5724253	1	5.18104e-29	35:C>T	35	1	0.978723	0.56383	0.43617	0.021277	0.542553	0.041648	0.491852	0.26675	18.6724	13.6936	1	0	2	0	0	2	2	0	2	0	2	0	0	0	2	0	2	0	2	0	0	0	0	0	2	0
7127805|F|0-11:G>A-11:G>A	TGCAGACACTCGTCCAGGAGTTCACTGGGATGTCTTTCGTCGGAAGGATGCTTCAATATTAGTTGATTA	TGCAGACACTCGTCCAGGAGTTCACTGGGATGTCTTTCGTCGGAAGGATGCTTCAATATTAGTTGATTA	scaffold11110	61746	1	4.73568e-29	Chromosome08	28416307	1	5.18104e-29	11:G>A	11	1	0.797872	0.542553	0.457447	0.202128	0.340426	0.322544	0.496378	0.409461	9.37634	7.89062	1	0	0	1	2	1	0	1	0	1	0	0	1	0	2	2	0	2	2	0	0	0	1	2	2	0
7111855|F|0-58:A>G-58:A>G	TGCAGACACTGATTCCAGAAGCAAAAACCCAGGAAGAAAGGTAACGCTTTGACCCAATAAGATGAGACC	TGCAGACACTGATTCCAGAAGCAAAAACCCAGGAAGAAAGGTAACGCTTTGACCCAATAAGATGAGACC	scaffold02264	796194	1	4.73568e-29	Chromosome09	28639109	1	5.18104e-29	58:A>G	58	1	0.989362	0.255319	0.744681	0.010638	0.244681	0.02105	0.380263	0.200656	33.5641	20.875	1	2	2	2	0	0	0	0	0	0	0	0	0	0	2	0	0	0	2	2	2	0	2	0	0	0
7111856|F|0-16:T>A-16:T>A	TGCAGACACTGCTGAGTACAAGGAACTTTCTTCCCTCTTTGACATATTATCTGTTGCACCATTGCAGAG	TGCAGACACTGCTGAGTACAAGGAACTTTCTTCCCTCTTTGACATATTATCTGTTGCACCATTGCAGAG	scaffold02719	81606	1	2.2033e-27	Chromosome07	16331871	1	2.4105e-27	16:T>A	16	1	0.989362	0.191489	0.808511	0.010638	0.180851	0.02105	0.309642	0.165346	6.11966	3.36	1	0	0	0	2	0	0	0	0	0	0	0	0	0	2	2	0	0	0	0	0	2	2	2	2	0
7111858|F|0-64:T>C-64:T>C	TGCAGACACTTCATGTAAGGCTGAAGTTAGACTTTCCATTGCCTTCTTGCTCTTTTCCTCCTCATGCCT	TGCAGACACTTCATGTAAGGCTGAAGTTAGACTTTCCATTGCCTTCTTGCTCTTTTCCTCCTCATGCCT	scaffold03614	1042537	1	4.73568e-29	Chromosome09	25100024	1	5.18104e-29	64:T>C	64	0.989362	0.978495	0.387097	0.612903	0.021505	0.365591	0.042086	0.474506	0.258296	11.4779	6.6383	1	1	0	0	2	0	0	2	0	0	0	0	0	2	0	1	0	2	2	0	0	2	2	2	2	2
7122646|F|0-35:C>T-35:C>T	TGCAGACAGAAAATCCACTACTTTCAGCACGTGCACCACTCAGCTAACAACATGGTATATGGAAGATGA	TGCAGACAGAAAATCCACTACTTTCAGCACGTGCACCACTCAGCTAACAACATGGTATATGGAAGATGA	scaffold02871	301192	1	4.73568e-29	Chromosome03	5173129	1	5.18104e-29	35:C>T	35	1	0.978723	0.265957	0.734043	0.021277	0.244681	0.041648	0.390448	0.216048	27.1478	18.1875	1	0	2	2	2	0	0	0	0	2	0	0	0	0	0	1	0	0	0	0	0	2	0	0	2	2
7143202|F|0-26:G>T-26:G>T	TGCAGACAGAAAATTTTTCAATAATTGTTGGATATGATGGAAGTTCATTCCAAAGGCAGTATGTAAATG	TGCAGACAGAAAATTTTTCAATAATTGTTGGATATGATGGAAGTTCATTCCAAAGGCAGTATGTAAATG	scaffold09319	1878	1	2.2033e-27	Chromosome09	27804974	1	2.4105e-27	26:G>T	26	1	0.393617	0.93617	0.06383	0.606383	0.329787	0.477365	0.119511	0.298438	7.7	9.63636	1	1	2	0	2	2	1	2	1	2	1	2	2	1	0	2	1	1	2	1	1	2	1	1	2	2
7109834|F|0-29:T>C-29:T>C	TGCAGACAGAAGAGTTCCAGGCAATGGTATAAGTATCACGAAAATTTTGTAGATTGTTTATTTGATTAC	TGCAGACAGAAGAGTTCCAGGCAATGGTATAAGTATCACGAAAATTTTGTAGATTGTTTATTTGATTAC	scaffold08828	13047	1	1.0251e-25	Chromosome03	29052481	1	1.1215e-25	29:T>C	29	1	0.797872	0.691489	0.308511	0.202128	0.489362	0.322544	0.426664	0.374604	20.3548	18.3165	1	0	1	1	0	0	2	1	2	2	2	0	1	0	2	0	2	1	0	2	0	0	1	0	2	0
7147278|F|0-32:A>G-32:A>G	TGCAGACAGAAGCTAGCGGTGCGATTTCTCTAATACTTGAAAAATCTATGTATGATCTGCAAAAGAAGA	TGCAGACAGAAGCTAGCGGTGCGATTTCTCTAATACTTGAAAAATCTATGTATGATCTGCAAAAGAAGA	scaffold03741	849837	1	2.2033e-27	Chromosome15	6319667	1	2.4105e-27	32:A>G	32	1	0.744681	0.585106	0.414894	0.255319	0.329787	0.380263	0.485514	0.432888	9.11111	9.70588	1	0	0	0	2	0	1	0	1	0	1	2	2	2	0	0	1	2	0	2	2	0	2	2	0	2
20471614|F|0-6:C>T-6:C>T	TGCAGACAGAGATGCAGTGAAAAAGCAGTACAGGAAGATGGCTGTGTTGCTTCACCCTGACAAGAATAA	TGCAGACAGAGATGCAGTGAAAAAGCAGTACAGGAAGATGGCTGTGTTGCTTCACCCTGACAAGAATAA	scaffold02815	65192	1	4.73568e-29	Chromosome13	6822921	1	5.18104e-29	6:C>T	6	1	1	0.095745	0.904255	0	0.095745	0	0.173155	0.086578	16.483	9.18182	1	0	0	0	2	0	0	0	0	0	0	0	0	0	0	2	0	0	0	0	0	0	0	0	0	0
7144495|F|0-32:G>A-32:G>A	TGCAGACAGAGTACTTACCTGAATCCATTTTCGGGCAAGAAGGCCTGATGGAGCTATTGGCAGATATTA	TGCAGACAGAGTACTTACCTGAATCCATTTTCGGGCAAGAAGGCCTGATGGAGCTATTGGCAGATATTA	scaffold03332	500088	1	2.2033e-27	Chromosome15	4505060	1	2.4105e-27	32:G>A	32	1	0.925532	0.702128	0.297872	0.074468	0.62766	0.137845	0.418289	0.278067	21.0818	16.875	1	2	2	0	0	2	2	0	2	2	2	2	2	2	0	0	2	1	0	0	2	0	2	0	0	2
13861887|F|0-40:A>G-40:A>G	TGCAGACAGATCAAATTATCAGTTATGGCTTTAGATATCCAAAATTAGTTTCACAATAATGTAATTTAC	TGCAGACAGATCAAATTATCAGTTATGGCTTTAGATATCCAAAATTAGTTTCACAATAATGTAATTTAC	scaffold04851	748668	1	7.92447e-27	Chromosome17	18986131	1	8.66972e-27	40:A>G	40	1	1	0.117021	0.882979	0	0.117021	0	0.206655	0.103327	28.2458	16.4167	1	0	0	0	0	0	0	0	0	0	0	0	0	0	0	0	0	0	0	0	0	0	0	2	0	0
20471615|F|0-23:A>G-23:A>G	TGCAGACAGCAGAGTGAAATTTCATTTTCTTTCTTTTCATACAGAGAGAAACTATGTCTGGTTCTTGTT	TGCAGACAGCAGAGTGAAATTTCATTTTCTTTCTTTTCATACAGAGAGAAACTATGTCTGGTTCTTGTT	scaffold02978	159271	1	4.73568e-29	Chromosome05	22355412	1	5.18104e-29	23:A>G	23	1	1	0.053191	0.946809	0	0.053191	0	0.100724	0.050362	23.2797	15	1	0	0	0	0	0	0	0	0	0	0	0	0	0	2	0	0	0	0	0	0	0	0	0	0	0
7116932|F|0-6:C>A-6:C>A	TGCAGACAGCTCCTACCCTTTCGTGTCTCTTTGCTTGAAGTGATCACCTTCATCTTGAACCTGCAACCT	TGCAGACAGCTCCTACCCTTTCGTGTCTCTTTGCTTGAAGTGATCACCTTCATCTTGAACCTGCAACCT	scaffold03834	319159	1	1.0251e-25	Chromosome05	8346232	1	1.1215e-25	6:C>A	6	1	0.893617	0.776596	0.223404	0.106383	0.670213	0.190131	0.34699	0.26856	22.2264	18.1978	1	2	0	0	2	2	2	0	2	0	2	2	2	2	0	1	2	1	2	2	2	0	2	2	2	1
13860838|F|0-46:T>C-46:T>C	TGCAGACAGGGATGATGCATGGGGACTGGGGAGTAGAAAATTTCACTATTTTGCATTTGATACCTGTAT	TGCAGACAGGGATGATGCATGGGGACTGGGGAGTAGAAAATTTCACTATTTTGCATTTGATACCTGTAT	scaffold03614	63983	1	2.2033e-27	Chromosome09	24109685	1	2.4105e-27	46:T>C	46	1	0.734043	0.87234	0.12766	0.265957	0.606383	0.390448	0.222725	0.306587	9.77273	12.1262	1	0	2	1	0	1	2	2	2	1	2	1	1	2	2	2	2	2	2	2	2	2	2	2	2	0
7123688|F|0-60:T>C-60:T>C	TGCAGACAGGTTCTAATGGGCTAATCTTAGTGTGCATCTTTGGTCATCCAGGGGATGGTATCGGGTAGA	TGCAGACAGGTTCTAATGGGCTAATCTTAGTGTGCATCTTTGGTCATCCAGGGGATGGTATCGGGTAGA	scaffold05511	1254	1	2.2033e-27	Chromosome09	12686622	1	2.4105e-27	60:T>C	60	1	0.659574	0.893617	0.106383	0.340426	0.553191	0.449072	0.190131	0.319602	23.1795	22.9533	1	1	2	2	2	0	1	2	1	2	1	2	2	1	2	2	1	2	1	2	2	2	2	1	2	2
13855474|F|0-19:T>A-19:T>A	TGCAGACAGTACTACAGAATCATTGAAAACATTGACATGATTTATATATGTAGTTTCTGCCATTTTTTT	TGCAGACAGTACTACAGAATCATTGAAAACATTGACATGATTTATATATGTAGTTTCTGCCATTTTTTT	scaffold07595	293903	2	1.0251e-25	Chromosome18	9831663	2	1.1215e-25	19:T>A	19	0.968085	1	0.10989	0.89011	0	0.10989	0	0.195629	0.097814	25.4474	15.5	1	0	0	0	0	2	0	0	0	2	0	0	0	0	0	0	0	0	0	0	0	0	0	-	0	0
20110246|F|0-60:A>C-60:A>C	TGCAGACAGTCTTTGATCGGCGGAAATTACGGTTTACTAAACACTACTACTTTCCTACCAAATCCAGAC	TGCAGACAGTCTTTGATCGGCGGAAATTACGGTTTACTAAACACTACTACTTTCCTACCAAATCCAGAC	scaffold00232	20659	1	4.73568e-29	Chromosome06	12958657	1	5.18104e-29	60:A>C	60	1	1	0.042553	0.957447	0	0.042553	0	0.081485	0.040742	24.7712	9	1	0	0	0	0	0	0	0	0	0	0	0	0	0	0	0	0	0	0	0	0	0	2	0	0	0
7147294|F|0-67:A>G-67:A>G	TGCAGACAGTGCTTCCGCAGCAATGCCAAAGAAATTGGATTCATCAAGGTAAGATGTCAAAATATTTAG	TGCAGACAGTGCTTCCGCAGCAATGCCAAAGAAATTGGATTCATCAAGGTAAGATGTCAAAATATTTAG	scaffold03237	243906	2	4.73568e-29	Chromosome18	3861255	1	5.18104e-29	67:A>G	67	1	1	0.085106	0.914894	0	0.085106	0	0.155727	0.077863	8	4.45455	1	0	2	0	0	0	0	0	0	2	0	0	0	0	0	2	0	0	0	0	0	0	0	0	0	0
7111868|F|0-47:C>A-47:C>A	TGCAGACAGTTAGCTTTTATCGGAGGAACTTGAAGATGAGAAGCCAGCTCTGTAAGGGTAATGGGTTGG	TGCAGACAGTTAGCTTTTATCGGAGGAACTTGAAGATGAGAAGCCAGCTCTGTAAGGGTAATGGGTTGG	scaffold11784	133255	1	2.2033e-27	Chromosome16	3662372	1	2.4105e-27	47:C>A	47	1	0.882979	0.776596	0.223404	0.117021	0.659574	0.206655	0.34699	0.276822	18.8667	18.6742	1	0	2	0	0	2	2	2	2	2	2	0	0	1	0	2	2	0	2	2	2	2	1	0	2	0
7107146|F|0-63:G>A-63:G>A	TGCAGACAGTTTCAAGTCCCTCTCCCCTCCAACAAAACGAAACTGGCCCATGGCTAGCTCTTCGTATTG	TGCAGACAGTTTCAAGTCCCTCTCCCCTCCAACAAAACGAAACTGGCCCATGGCTAGCTCTTCGTATTG	scaffold06494	41683	1	2.2033e-27	Chromosome09	3999288	1	2.4105e-27	63:G>A	63	1	0.595745	0.893617	0.106383	0.404255	0.489362	0.481666	0.190131	0.335899	13.5211	15.4078	1	2	1	2	1	1	2	1	2	2	2	2	1	2	1	2	2	0	0	0	0	1	1	0	1	0
7107147|F|0-31:A>G-31:A>G	TGCAGACAGTTTTGATTGAGTTGACCGAGTTAGAGGCAGAGGAAAGGGATGGGGAATCGGACCCAGACT	TGCAGACAGTTTTGATTGAGTTGACCGAGTTAGAGGCAGAGGAAAGGGATGGGGAATCGGACCCAGACT	scaffold08359	2149196	1	2.2033e-27	Chromosome14	6223283	1	2.4105e-27	31:A>G	31	1	0.851064	0.265957	0.734043	0.148936	0.117021	0.253508	0.390448	0.321978	17.5714	10.8788	1	0	1	1	0	0	0	1	0	1	0	0	2	0	0	1	0	0	0	0	0	1	2	0	0	0
7116745|F|0-52:G>A-52:G>A	TGCAGACATAAAATAAGAGAACTATTGAATGATGAATGCTGGTTCATTATCAGAGAACGAGTCTTTGGA	TGCAGACATAAAATAAGAGAACTATTGAATGATGAATGCTGGTTCATTATCAGAGAACGAGTCTTTGGA	scaffold10689	295368	1	2.2033e-27	Chromosome10	646712	1	2.4105e-27	52:G>A	52	0.93617	0.193182	0.931818	0.068182	0.806818	0.125	0.311725	0.127066	0.219396	4.08696	5.49515	1	2	1	2	1	1	1	0	1	1	1	1	2	1	2	-	1	1	1	1	-	1	1	1	2	1
20111144|F|0-47:G>A-47:G>A	TGCAGACATAAAGATAGATTGAGGGAGAGGGGTGAAGTAGGTGAAATGGCTTAGCATGAGAAAATTCGG	TGCAGACATAAAGATAGATTGAGGGAGAGGGGTGAAGTAGGTGAAATGGCTTAGCATGAGAAAATTCGG	scaffold08045	199356	1	1.0251e-25	Chromosome01	14061925	1	1.1215e-25	47:G>A	47	1	1	0.053191	0.946809	0	0.053191	0	0.100724	0.050362	27.0254	11.1429	1	0	0	0	0	0	0	0	0	0	0	0	0	0	0	2	0	0	2	0	0	0	0	0	0	0
7111874|F|0-58:T>A-58:T>A	TGCAGACATACACGGTAAGTAACCTATATCGCCTTTTCTTTTCCTTTCTCAATTCACTTTCTGTTTCAT	TGCAGACATACACGGTAAGTAACCTATATCGCCTTTTCTTTTCCTTTCTCAATTCACTTTCTGTTTCAT	scaffold06983	56291	1	4.73568e-29	Chromosome01	10186241	1	5.18104e-29	58:T>A	58	1	1	0.095745	0.904255	0	0.095745	0	0.173155	0.086578	6.05983	3.45455	1	0	2	0	0	0	0	0	0	0	0	0	0	0	0	0	0	0	0	2	0	0	0	0	0	0
7111254|F|0-6:A>C-6:A>C	TGCAGAAATAGATATAAGCAGAATAAGATCAATGCCAACTACTCTACTCTCTCAGATAAACAATGCAAC	TGCAGAAATAGATATAAGCAGAATAAGATCAATGCCAACTACTCTACTCTCTCAGATAAACAATGCAAC	scaffold06711	510768	1	4.73568e-29	Chromosome12	855004	1	5.18104e-29	6:A>C	6	1	0.797872	0.893617	0.106383	0.202128	0.691489	0.322544	0.190131	0.256338	8.05319	10.1509	1	2	1	1	2	0	2	2	2	2	2	2	2	2	2	1	2	1	2	0	1	2	2	2	2	2
13855475|F|0-37:G>A-37:G>A	TGCAGACATAGCCGAAAAACCAACGAGATATGGTCAAGAGAGACGGAAGCAACAAAGAAAGACAAAAGC	TGCAGACATAGCCGAAAAACCAACGAGATATGGTCAAGAGAGACGGAAGCAACAAAGAAAGACAAAAGC		0	0	999	Chromosome14	4887772	1	2.4105e-27	37:G>A	37	1	0.904255	0.319149	0.680851	0.095745	0.223404	0.173155	0.434586	0.303871	9.5	7.36842	1	0	1	1	0	0	0	1	0	0	0	0	0	0	2	1	0	0	0	0	0	1	2	2	0	0
20471627|F|0-63:G>T-63:G>T	TGCAGACATAGCTTGCTTTGAGATTTGAAACAAGAAGGCAAAGATAAAGAATTTGAGAGATGGGATTCT	TGCAGACATAGCTTGCTTTGAGATTTGAAACAAGAAGGCAAAGATAAAGAATTTGAGAGATGGGATTCT		0	0	999	Chromosome16	24386794	1	5.18104e-29	63:G>T	63	1	0.978723	0.170213	0.829787	0.021277	0.148936	0.041648	0.282481	0.162064	7.91304	5.04762	1	0	1	2	2	0	0	2	0	0	0	0	0	0	2	0	0	0	0	0	0	0	0	0	0	0
7107149|F|0-26:C>T-26:C>T	TGCAGACATAGTTATCTGCAATTAGGCAGGAAATTGATTTGTCAGATCAAATAACAAATCCTAAAATAT	TGCAGACATAGTTATCTGCAATTAGGCAGGAAATTGATTTGTCAGATCAAATAACAAATCCTAAAATAT	scaffold12004	345865	1	4.73568e-29	Chromosome07	23494358	1	5.18104e-29	26:C>T	26	1	0.585106	0.797872	0.202128	0.414894	0.382979	0.485514	0.322544	0.404029	15.4348	17.179	1	0	1	2	2	0	1	1	1	0	1	1	1	1	2	1	1	2	2	2	2	2	0	2	2	0
20471628|F|0-15:T>C-15:T>C	TGCAGACATATATACTATTTTTCTAACAAAAACCTAGATGGATAATAACCTTCAAGCTGTCTAACTACT	TGCAGACATATATACTATTTTTCTAACAAAAACCTAGATGGATAATAACCTTCAAGCTGTCTAACTACT	scaffold12004	266358	1	4.73568e-29	Chromosome07	23573329	1	5.18104e-29	15:T>C	15	0.989362	1	0.107527	0.892473	0	0.107527	0	0.19193	0.095965	4.82609	3.07692	1	0	0	0	0	2	0	0	0	0	0	0	0	0	0	0	0	0	0	0	2	2	0	0	0	0
13855476|F|0-25:C>T-25:C>T	TGCAGACATCAATACTCCCCCTAGTCCATCTCGTTCTGGTTCATGGGCGCTAACTCCTTCAGTGATTAT	TGCAGACATCAATACTCCCCCTAGTCCATCTCGTTCTGGTTCATGGGCGCTAACTCCTTCAGTGATTAT	scaffold07894	249393	1	4.73568e-29	Chromosome03	20030272	1	5.18104e-29	25:C>T	25	1	1	0.148936	0.851064	0	0.148936	0	0.253508	0.126754	13.1356	7.11111	1	0	0	0	2	0	0	0	0	2	0	0	0	0	0	0	0	0	2	0	0	0	0	0	2	0
7147306|F|0-62:A>G-62:A>G	TGCAGACATCTATGAAAAAATATTTTGTAACAATGTATAGCAGTTACATACAAAAAGATTTCAACAGAA	TGCAGACATCTATGAAAAAATATTTTGTAACAATGTATAGCAGTTACATACAAAAAGATTTCAACAGAA	scaffold05709	204871	1	4.73568e-29	Chromosome15	15491864	1	5.18104e-29	62:A>G	62	1	1	0.319149	0.680851	0	0.319149	0	0.434586	0.217293	18.5932	10	1	0	0	0	0	0	2	0	2	0	2	0	0	0	0	0	2	0	0	2	2	0	0	0	0	0
7107150|F|0-49:G>A-49:G>A	TGCAGACATCTTGTCTCATTGGTGAGAATTCCCTGATCCAAGTATGAATGAGAAAGCATGAGATGCTGA	TGCAGACATCTTGTCTCATTGGTGAGAATTCCCTGATCCAAGTATGAATGAGAAAGCATGAGATGCTGA	scaffold08265	786658	1	4.73568e-29	Chromosome12	28877690	1	5.18104e-29	49:G>A	49	1	0.712766	0.893617	0.106383	0.287234	0.606383	0.409461	0.190131	0.299796	11.378	11.283	1	0	2	1	1	0	2	1	2	1	2	2	2	2	2	1	2	1	1	2	1	2	2	2	1	2
7147308|F|0-58:C>T-58:C>T	TGCAGACATCTTTCAGAACTTTTTCAACACCTGTTTTCTCTTCACCCTCCATTCGTCTCCCTTCTCTTT	TGCAGACATCTTTCAGAACTTTTTCAACACCTGTTTTCTCTTCACCCTCCATTCGTCTCCCTTCTCTTT	scaffold05432	213958	1	4.73568e-29	Chromosome04	22895289	1	5.18104e-29	58:C>T	58	0.989362	0.978495	0.204301	0.795699	0.021505	0.182796	0.042086	0.325124	0.183605	6.18421	4.6	1	0	0	0	0	0	0	2	0	2	0	0	0	0	2	0	0	0	0	0	0	2	2	0	2	0
7139141|F|0-34:G>C-34:G>C	TGCAGACATGACGACAAATTCAAATTGTTTTCTGGTACTAGGTCTATAATTCACTCATTTGTGTAAGCA	TGCAGACATGACGACAAATTCAAATTGTTTTCTGGTACTAGGTCTATAATTCACTCATTTGTGTAAGCA	scaffold03614	3023561	1	4.73568e-29	Chromosome09	27094520	1	5.18104e-29	34:G>C	34	1	0.808511	0.617021	0.382979	0.191489	0.425532	0.309642	0.472612	0.391127	9.21505	8.04	1	2	2	1	1	2	0	2	0	2	0	2	1	0	1	2	0	0	1	2	2	2	1	0	2	2
7107152|F|0-15:A>G-15:A>G	TGCAGACATGCATACAACTTTAGGGTTCCTGACAAGTAAAACTCAAACTAGATTTTCCTTCTGAGCTAA	TGCAGACATGCATACAACTTTAGGGTTCCTGACAAGTAAAACTCAAACTAGATTTTCCTTCTGAGCTAA	scaffold07520	859292	1	4.73568e-29	Chromosome01	24497479	1	5.18104e-29	15:A>G	15	0.968085	0.967033	0.098901	0.901099	0.032967	0.065934	0.06376	0.178239	0.121	19.6306	4.81818	1	0	2	0	0	0	0	0	0	0	0	0	0	0	-	0	0	0	2	0	0	0	0	0	0	0
7111882|F|0-48:T>C-48:T>C	TGCAGACATGCCCATATATATGATAACTGGGTCTGGTTAGCAAATGATTGCCCTAAATCCTAAGTAGGA	TGCAGACATGCCCATATATATGATAACTGGGTCTGGTTAGCAAATGATTGCCCTAAATCCTAAGTAGGA	scaffold02969	15783	1	4.73568e-29	Chromosome12	27073322	1	5.18104e-29	48:T>C	48	1	0.989362	0.095745	0.904255	0.010638	0.085106	0.02105	0.173155	0.097103	19.0086	10.5	1	0	0	0	0	0	0	0	0	0	0	0	0	0	0	1	0	0	0	0	0	2	0	0	2	0
7123689|F|0-45:A>T-45:A>T	TGCAGACATGGCAACCGAGTATTCAGGTGAAATCCCATTTACATGATTTTAGAAAATAATATTGAAGAG	TGCAGACATGGCAACCGAGTATTCAGGTGAAATCCCATTTACATGATTTTAGAAAATAATATTGAAGAG	scaffold05206	60517	1	2.2033e-27	Chromosome03	21876140	1	2.4105e-27	45:A>T	45	1	0.797872	0.861702	0.138298	0.202128	0.659574	0.322544	0.238343	0.280444	14.6452	14.8812	1	2	2	2	0	0	2	2	2	2	2	2	1	2	2	1	2	1	0	1	2	1	1	2	0	1
7147313|F|0-57:G>A-57:G>A	TGCAGACATGGCATAGTTTTCCTATCTAATGGATTCATCTGGGATTAGGTTATGGTTGTAAAAATACGC	TGCAGACATGGCATAGTTTTCCTATCTAATGGATTCATCTGGGATTAGGTTATGGTTGTAAAAATACGC	scaffold10173	789752	1	4.73568e-29	Chromosome15	10395325	1	5.18104e-29	57:G>A	57	1	0.978723	0.148936	0.851064	0.021277	0.12766	0.041648	0.253508	0.147578	6.61739	3.17647	1	1	0	0	0	2	0	0	0	0	0	0	0	0	0	0	0	0	0	0	2	0	0	0	0	0
7122654|F|0-21:G>C-21:G>C	TGCAGACATGGGAGAGCTCCAGCTTTCTGATATGTAAATCCCAGCAAAATGGGCGAAAAGGAATGCCTT	TGCAGACATGGGAGAGCTCCAGCTTTCTGATATGTAAATCCCAGCAAAATGGGCGAAAAGGAATGCCTT	scaffold11735	23636	1	4.73568e-29	Chromosome08	12699799	1	5.18104e-29	21:G>C	21	1	0.946809	0.670213	0.329787	0.053191	0.617021	0.100724	0.442055	0.27139	15.2818	13.7284	1	2	2	2	0	2	2	2	2	0	2	2	2	0	2	0	2	1	2	1	2	0	2	1	0	0
7143208|F|0-26:T>G-26:T>G	TGCAGACATGGGTTGACTCCTTTTGTTTGCAAGCATGCCTATTCCTAACTATACCAACAGAATAGACCA	TGCAGACATGGGTTGACTCCTTTTGTTTGCAAGCATGCCTATTCCTAACTATACCAACAGAATAGACCA	scaffold11998	1092921	1	2.2033e-27	Chromosome05	5849293	1	2.4105e-27	26:T>G	26	1	0.904255	0.553191	0.446809	0.095745	0.457447	0.173155	0.494341	0.333748	15.6355	12.2769	1	2	1	0	2	1	0	2	0	2	0	2	0	0	2	0	0	2	2	2	2	0	0	0	2	2
7107154|F|0-48:C>T-48:C>T	TGCAGACATGTTTTTTGCAGTTAGTTGTCCAGGGAAGTAACTGTTATACATGGTCAGAAATTTTGAGTC	TGCAGACATGTTTTTTGCAGTTAGTTGTCCAGGGAAGTAACTGTTATACATGGTCAGAAATTTTGAGTC	scaffold02892	757836	1	4.73568e-29	Chromosome09	6192311	1	5.18104e-29	48:C>T	48	1	0.648936	0.882979	0.117021	0.351064	0.531915	0.455636	0.206655	0.331145	9.06757	9.61538	1	2	2	2	2	1	2	1	2	1	2	2	1	1	1	1	2	0	1	0	2	1	0	2	1	2
20493276|F|0-42:T>C-42:T>C	TGCAGACATTACCCAAATCCTGAAACATGCTTGGGAACTTTGTCTCACTTGGTTGTGGGATCGGAGGCA	TGCAGACATTACCCAAATCCTGAAACATGCTTGGGAACTTTGTCTCACTTGGTTGTGGGATCGGAGGCA	scaffold12262	125734	1	4.73568e-29	Chromosome04	23330677	1	5.18104e-29	42:T>C	42	0.968085	0.989011	0.032967	0.967033	0.010989	0.021978	0.021737	0.06376	0.042748	5.95575	5.33333	1	0	0	0	0	0	0	0	0	0	0	0	0	0	0	0	0	0	0	0	0	0	0	0	0	0
7107395|F|0-6:C>T-6:C>T	TGCAGACATTAGGATGCCAGCATGTGAAGGAGGACCAGTAGGACGCCATAAACGCTGAGCATTTGAACC	TGCAGACATTAGGATGCCAGCATGTGAAGGAGGACCAGTAGGACGCCATAAACGCTGAGCATTTGAACC	scaffold02196	196527	1	4.73568e-29	Chromosome04	25268904	1	5.18104e-29	6:C>T	6	0.851064	0.9	0.15	0.85	0.1	0.05	0.18	0.255	0.2175	5.23913	3.64286	1	0	0	0	-	-	0	0	0	0	0	0	0	0	0	0	0	2	0	0	0	0	1	0	-	0
7111842|F|0-8:T>A-8:T>A	TGCAGACATTCAACAGCATGTTACCAAAATTGAAAGCAGTGTCACAAGTGATGAAAAAAATATGATAGG	TGCAGACATTCAACAGCATGTTACCAAAATTGAAAGCAGTGTCACAAGTGATGAAAAAAATATGATAGG	scaffold07519	834055	1	4.73568e-29	Chromosome18	7868407	1	5.18104e-29	8:T>A	8	1	0.93617	0.595745	0.404255	0.06383	0.531915	0.119511	0.481666	0.300589	12.4	9.64706	1	0	2	0	2	0	2	0	2	0	2	0	0	2	0	0	2	1	0	1	2	0	0	2	2	0
7107155|F|0-51:T>G-51:T>G	TGCAGACATTGACCAAAATGGCTTTGTAAGGTATGCTTCATTTATAATATTTTACACATTTCCATACTG	TGCAGACATTGACCAAAATGGCTTTGTAAGGTATGCTTCATTTATAATATTTTACACATTTCCATACTG	scaffold06582	175759	2	4.73568e-29	Chromosome15	8949491	2	5.18104e-29	51:T>G	51	1	0.946809	0.702128	0.297872	0.053191	0.648936	0.100724	0.418289	0.259507	9.77876	9.40741	1	0	2	0	2	0	2	2	2	2	2	0	2	2	2	0	2	2	2	2	0	0	0	0	2	2
7109631|F|0-49:A>C-49:A>C	TGCAGACATTGCTGCCCTCAATGTTTCAAAGGTGTGCTGTGCCTTTTCCACCAAGGAATTGCATTCTTT	TGCAGACATTGCTGCCCTCAATGTTTCAAAGGTGTGCTGTGCCTTTTCCACCAAGGAATTGCATTCTTT	scaffold05157	123146	1	4.73568e-29	Chromosome08	10516691	1	5.18104e-29	49:A>C	49	1	0.595745	0.829787	0.170213	0.404255	0.425532	0.481666	0.282481	0.382073	28.9155	25.9694	1	0	2	0	1	0	1	2	1	2	1	1	1	2	2	1	1	2	2	2	2	2	0	1	2	2
13855483|F|0-55:T>C-55:T>C	TGCAGACATTGGTTTACTTGATAAATTGCTTGATCAAATATCCTTGAGCTTAGTTTTGTTTCATATAGC	TGCAGACATTGGTTTACTTGATAAATTGCTTGATCAAATATCCTTGAGCTTAGTTTTGTTTCATATAGC	scaffold00321	133162	1	1.0251e-25	Chromosome08	31348491	1	1.1215e-25	55:T>C	55	1	0.989362	0.234043	0.765957	0.010638	0.223404	0.02105	0.358533	0.189792	33.2222	17.8571	1	0	0	2	0	0	0	2	0	0	0	0	2	0	0	0	0	0	0	0	2	0	2	0	2	0
7143209|F|0-58:A>C-58:A>C	TGCAGACATTGTGGCCGCTCGTTCTTCTTCTTCTTCTTCGAGTCATCATTAGAAATGGATAAAATGGAT	TGCAGACATTGTGGCCGCTCGTTCTTCTTCTTCTTCTTCGAGTCATCATTAGAAATGGATAAAATGGAT	scaffold06137	132263	1	4.73568e-29	Chromosome08	25843670	1	5.18104e-29	58:A>C	58	0.93617	0.954545	0.125	0.875	0.045455	0.079545	0.086777	0.21875	0.152763	7.31776	7.5	1	0	0	0	0	1	0	0	0	0	0	0	0	0	0	0	0	0	0	2	0	0	0	2	0	0
7122656|F|0-60:A>C-60:A>C	TGCAGACATTTCAACATTTGAATTAGGATCATGACCTAGTTGAGCAACCTCTTGCTACAAAGATGCTTG	TGCAGACATTTCAACATTTGAATTAGGATCATGACCTAGTTGAGCAACCTCTTGCTACAAAGATGCTTG	scaffold00847	1810279	1	4.73568e-29	Chromosome16	27817287	1	5.18104e-29	60:A>C	60	1	0.978723	0.37234	0.62766	0.021277	0.351064	0.041648	0.467406	0.254527	21.3684	16.7674	1	2	2	0	2	0	0	2	0	0	0	0	0	0	0	1	0	0	0	0	0	2	2	0	1	0
7111894|F|0-5:T>A-5:T>A	TGCAGTCCAAACCAAAAAGTTACAGAAAGGAAGTACCAATGTTGGTATCTCTATTAGATTCCAAGAAGC	TGCAGTCCAAACCAAAAAGTTACAGAAAGGAAGTACCAATGTTGGTATCTCTATTAGATTCCAAGAAGC	scaffold12202	47101	1	1.0251e-25	Chromosome10	18488965	1	1.1215e-25	5:T>A	5	1	0.925532	0.329787	0.670213	0.074468	0.255319	0.137845	0.442055	0.28995	6.75229	5.41463	1	0	0	0	2	0	0	2	0	1	0	0	2	0	2	2	0	0	2	2	0	1	0	0	2	0
13858692|F|0-62:A>T-62:A>T	TGCAGACCAAATTATGGTAGAACTAGCTGTTGAATTCAGTTGATAGCGAAGGAAATAGATAAATTTATG	TGCAGACCAAATTATGGTAGAACTAGCTGTTGAATTCAGTTGATAGCGAAGGAAATAGATAAATTTATG	scaffold00318	390828	1	4.73568e-29	Chromosome17	21633154	1	5.18104e-29	62:A>T	62	1	1	0.37234	0.62766	0	0.37234	0	0.467406	0.233703	15.2797	8.90909	1	0	0	0	0	2	2	0	2	0	2	0	0	2	0	0	2	2	0	2	2	0	0	0	0	0
7111895|F|0-31:A>G-31:A>G	TGCAGACCAAGAACTAAACAATTGAAGAACCACCAGCAATTTTTCTCATCATTATAAATGTAATTACAG	TGCAGACCAAGAACTAAACAATTGAAGAACCACCAGCAATTTTTCTCATCATTATAAATGTAATTACAG	scaffold09000	363991	1	1.0251e-25	Chromosome16	2206697	1	1.1215e-25	31:A>G	31	1	0.989362	0.37234	0.62766	0.010638	0.361702	0.02105	0.467406	0.244228	14.1282	11.9574	1	2	2	2	2	0	0	2	0	0	0	0	2	0	2	0	0	2	2	0	0	2	2	2	2	2
7147331|F|0-53:A>G-53:A>G	TGCAGACCAATACTTCTGGTGAGAATATGTGCTGGAGGGTGTGTAGCACCTGCAAGCCTTGCTGCGGCA	TGCAGACCAATACTTCTGGTGAGAATATGTGCTGGAGGGTGTGTAGCACCTGCAAGCCTTGCTGCGGCA	scaffold03104	36051	1	4.73568e-29	Chromosome18	3023555	1	5.18104e-29	53:A>G	53	1	1	0.074468	0.925532	0	0.074468	0	0.137845	0.068923	6.61864	3.25	1	0	0	0	0	0	0	0	0	0	0	0	0	0	0	2	0	0	0	0	0	0	0	0	0	2
7111898|F|0-18:T>C-18:T>C	TGCAGACCAATCAGTTTCTTGGTTTACCACCCTCACCACCACGTTCTCTGCCTTCATGTGCCACTCACG	TGCAGACCAATCAGTTTCTTGGTTTACCACCCTCACCACCACGTTCTCTGCCTTCATGTGCCACTCACG	scaffold04137	22957	1	2.2033e-27	Chromosome15	11650461	1	2.4105e-27	18:T>C	18	1	0.574468	0.819149	0.180851	0.425532	0.393617	0.488909	0.296288	0.392598	7.02857	7.41667	1	0	1	2	2	2	1	0	1	2	1	2	2	1	2	0	1	1	2	1	2	0	2	2	0	1
7110771|F|0-29:T>C-29:T>C	TGCAGACCACAATAACTTAGATCCAACCATATTAGAGAGCAAAAACTCATCATACTTGAGCCCTTTACT	TGCAGACCACAATAACTTAGATCCAACCATATTAGAGAGCAAAAACTCATCATACTTGAGCCCTTTACT	scaffold11170	182585	1	4.73568e-29	Chromosome06	572037	1	5.18104e-29	29:T>C	29	1	1	0.117021	0.882979	0	0.117021	0	0.206655	0.103327	14.1441	8.85714	1	0	0	2	0	0	0	0	0	0	0	0	0	0	0	2	0	0	0	0	0	2	0	0	0	0
7111900|F|0-39:T>C-39:T>C	TGCAGACCACTCATAGCAGACATAACTGCAACAGATAAATGTCACACTCATGCATTAGTTACATTTCAG	TGCAGACCACTCATAGCAGACATAACTGCAACAGATAAATGTCACACTCATGCATTAGTTACATTTCAG	scaffold09880	116596	1	1.0251e-25	Chromosome13	2974617	1	1.1215e-25	39:T>C	39	1	0.925532	0.340426	0.659574	0.074468	0.265957	0.137845	0.449072	0.293459	8.3945	5.36585	1	0	2	2	0	0	0	1	0	0	0	2	2	0	2	0	0	0	0	2	0	0	1	0	2	0
7111901|F|0-58:A>T-58:A>T	TGCAGACCAGAAACCACAGAGTTTAGCTTGTCCTGATATGTTTCGTGGTTCTTCTCAAATGTGTTCTGT	TGCAGACCAGAAACCACAGAGTTTAGCTTGTCCTGATATGTTTCGTGGTTCTTCTCAAATGTGTTCTGT	scaffold03750	89974	1	4.73568e-29	Chromosome11	24719805	1	5.18104e-29	58:A>T	58	1	0.978723	0.574468	0.425532	0.021277	0.553191	0.041648	0.488909	0.265278	12.7739	8.74242	1	2	0	2	0	0	2	0	2	0	2	0	2	2	0	2	2	0	0	1	2	2	0	2	0	0
15485190|F|0-41:A>G-41:A>G	TGCAGACCAGATCTAGATGTCCCCTCAGGTATTGTCCAAATACGTGCTGTGGAATCTCCAGACCTTACA	TGCAGACCAGATCTAGATGTCCCCTCAGGTATTGTCCAAATACGTGCTGTGGAATCTCCAGACCTTACA	scaffold00174	13881	2	6.12599e-28	Chromosome12	25164260	2	6.7021e-28	41:A>G	41	1	1	0.159574	0.840426	0	0.159574	0	0.268221	0.13411	15.0932	8.47368	1	0	0	0	0	0	0	0	0	2	0	2	0	0	2	0	0	0	0	0	0	0	2	0	0	0
13858695|F|0-68:T>G-68:T>G	TGCAGACCAGCAACATCCAATATGGCTATATCAGTTAGCTTCATAAGAAGCTTATGATAACCTTTTGAT	TGCAGACCAGCAACATCCAATATGGCTATATCAGTTAGCTTCATAAGAAGCTTATGATAACCTTTTGAT	scaffold05116	368967	2	1.70326e-28	Chromosome17	14393199	2	1.86343e-28	68:T>G	68	1	0.968085	0.382979	0.617021	0.031915	0.351064	0.061793	0.472612	0.267202	30.4737	8.33333	1	0	2	0	0	0	0	0	0	1	0	2	0	0	2	0	0	0	0	0	0	0	2	0	2	2
20493288|F|0-23:C>A-23:C>A	TGCAGACCAGCTTTTATGCCCTACCAAAAACCCTAATCTTTATTACCCATTTGGTTATGGAACTCCCAT	TGCAGACCAGCTTTTATGCCCTACCAAAAACCCTAATCTTTATTACCCATTTGGTTATGGAACTCCCAT	scaffold01106	159639	1	2.2033e-27	Chromosome06	12467533	1	2.4105e-27	23:C>A	23	1	1	0.191489	0.808511	0	0.191489	0	0.309642	0.154821	5.76923	2.77273	1	0	0	2	0	0	0	2	0	0	0	0	0	0	0	0	0	0	0	0	0	2	2	0	2	2
7111904|F|0-67:T>G-67:T>G	TGCAGACCAGTTTCTATAGAGGGCCCAAATGTCTCCCTTTCCTGGAAGTATGCAAATGACCCCACGATT	TGCAGACCAGTTTCTATAGAGGGCCCAAATGTCTCCCTTTCCTGGAAGTATGCAAATGACCCCACGATT	scaffold09761	803843	1	6.12599e-28	Chromosome09	101975	1	6.7021e-28	67:T>G	67	1	0.989362	0.308511	0.691489	0.010638	0.297872	0.02105	0.426664	0.223857	13.7778	7.5	1	0	2	0	0	2	0	0	0	0	0	2	0	0	0	0	0	0	2	0	0	0	2	0	0	2
13861846|F|0-43:G>A-43:G>A	TGCAGACCATGAAAGGTCCAGTGAAGTCTGATAAAGTAAGCTAGTTTATCAGAATAATCCATTTTACAG	TGCAGACCATGAAAGGTCCAGTGAAGTCTGATAAAGTAAGCTAGTTTATCAGAATAATCCATTTTACAG	scaffold03104	75465	1	2.2033e-27	Chromosome18	2981850	1	2.4105e-27	43:G>A	43	1	1	0.117021	0.882979	0	0.117021	0	0.206655	0.103327	35.517	18.3846	1	0	0	0	0	0	0	0	0	0	0	0	0	0	0	0	0	0	0	0	0	2	0	0	2	0
7107159|F|0-29:T>C-29:T>C	TGCAGACCATGCTCATTCCTCACTTCTTATCATCCTTATGTTAGTCTATGTCTGGCCCTTCCTTACACT	TGCAGACCATGCTCATTCCTCACTTCTTATCATCCTTATGTTAGTCTATGTCTGGCCCTTCCTTACACT	scaffold04457	282469	1	4.73568e-29	Chromosome01	30854307	1	5.18104e-29	29:T>C	29	0.957447	0.933333	0.333333	0.666667	0.066667	0.266667	0.124444	0.444444	0.284444	18.125	10.7561	1	0	2	2	1	2	0	2	0	-	0	0	2	0	2	0	0	0	2	0	0	1	2	0	1	0
7147335|F|0-52:G>T-52:G>T	TGCAGACCATGTGATTCAGATGAAGACTTCATTCTATTTTCCATAATCAAACGACCAGAACTAGCAGCC	TGCAGACCATGTGATTCAGATGAAGACTTCATTCTATTTTCCATAATCAAACGACCAGAACTAGCAGCC	scaffold04457	962147	1	4.73568e-29	Chromosome01	30186719	1	5.18104e-29	52:G>T	52	1	0.978723	0.117021	0.882979	0.021277	0.095745	0.041648	0.206655	0.124151	7.95652	4.16667	1	0	0	0	0	0	0	0	0	0	0	0	1	0	0	0	0	0	0	0	0	0	0	0	0	0
13855488|F|0-42:C>T-42:C>T	TGCAGACCCAAAGCTTTCAAATGATGCTCACTCTGAAGTTCACGCATCCGACCACTGACAGCCAGAAGA	TGCAGACCCAAAGCTTTCAAATGATGCTCACTCTGAAGTTCACGCATCCGACCACTGACAGCCAGAAGA	scaffold01551	3145135	2	4.73568e-29	Chromosome15	628986	2	5.18104e-29	42:C>T	42	1	1	0.393617	0.606383	0	0.393617	0	0.477365	0.238683	8.75424	5	1	0	0	2	0	0	2	0	2	0	2	2	0	2	0	0	2	0	0	0	2	0	0	2	0	0
13858696|F|0-66:C>G-66:C>G	TGCAGACCCAAGTACCGTTTGATGGCACCTGCACCACCTTGACATGCTGGACAGTGCCACTGTCTACCT	TGCAGACCCAAGTACCGTTTGATGGCACCTGCACCACCTTGACATGCTGGACAGTGCCACTGTCTACCT	scaffold08078	60380	1	2.2033e-27	Chromosome11	8166133	1	2.4105e-27	66:C>G	66	0.840426	0.873418	0.291139	0.708861	0.126582	0.164557	0.221118	0.412754	0.316936	16	13.3667	1	2	0	2	0	1	0	0	0	2	0	-	0	-	0	2	0	2	2	0	-	0	-	0	0	-
7116926|F|0-66:T>G-66:T>G	TGCAGACCCACAAAAAAAAATCCCATTAGTTGAATCCTAATCATAAATCAACTCCAAACAAGAATTTTA	TGCAGACCCACAAAAAAAAATCCCATTAGTTGAATCCTAATCATAAATCAACTCCAAACAAGAATTTTA	scaffold09365	291579	2	3.6869e-25	Chromosome03	27676815	2	4.03363e-25	66:T>G	66	0.851064	0.8625	0.3875	0.6125	0.1375	0.25	0.237187	0.474687	0.355937	3.1954	4.02703	1	0	2	1	0	-	0	2	0	0	0	0	2	0	2	-	0	0	-	0	0	2	2	0	0	-
20471659|F|0-14:C>G-14:C>G	TGCAGACCCAGAACCAGAACCATTCTCTTCGGTCCTTTTATCTATCTTTTTCCTCTTTTTGTACCCTCT	TGCAGACCCAGAACCAGAACCATTCTCTTCGGTCCTTTTATCTATCTTTTTCCTCTTTTTGTACCCTCT	scaffold07360	15514	1	4.73568e-29	Chromosome11	24607817	1	5.18104e-29	14:C>G	14	1	1	0.414894	0.585106	0	0.414894	0	0.485514	0.242757	10.0509	6.46939	1	2	0	0	0	0	2	0	2	0	2	2	0	2	0	0	2	2	0	0	2	0	0	2	0	0
7111918|F|0-12:C>T-12:C>T	TGCAGACCCAGACTTGATGAAACAGATAGGTCAAGGCATTGCACGTGTGATTATAGATGGACCCACTTT	TGCAGACCCAGACTTGATGAAACAGATAGGTCAAGGCATTGCACGTGTGATTATAGATGGACCCACTTT	scaffold04450	154028	1	4.73568e-29	Chromosome01	34311508	1	5.18104e-29	12:C>T	12	1	1	0.297872	0.702128	0	0.297872	0	0.418289	0.209144	25.0424	12.9189	1	0	2	0	2	2	0	2	0	0	0	0	0	0	2	0	0	0	2	0	0	2	2	0	2	0
7111919|F|0-66:C>T-66:C>T	TGCAGACCCATAAAGTGCAACTGTGCAGCAGAATGAAGTTAGGTAGAGATGCTAAAGAATAGAAGACTC	TGCAGACCCATAAAGTGCAACTGTGCAGCAGAATGAAGTTAGGTAGAGATGCTAAAGAATAGAAGACTC	scaffold00363	67524	1	4.73568e-29	Chromosome11	9559573	1	5.18104e-29	66:C>T	66	1	0.648936	0.670213	0.329787	0.351064	0.319149	0.455636	0.442055	0.448846	16.9333	16.2875	1	1	2	1	1	1	0	1	0	2	0	0	1	2	2	0	0	2	1	2	0	1	1	2	1	0
7122663|F|0-26:G>T-26:G>T	TGCAGACCCATGAGCCCAAGCAGATTGGACGCGGGACCAGCTTGTCCTTGTTGGGAAGAAAAGGAATCA	TGCAGACCCATGAGCCCAAGCAGATTGGACGCGGGACCAGCTTGTCCTTGTTGGGAAGAAAAGGAATCA	scaffold03283	191046	1	2.2033e-27	Chromosome12	28029347	1	2.4105e-27	26:G>T	26	1	0.680851	0.904255	0.095745	0.319149	0.585106	0.434586	0.173155	0.303871	9.825	10.3645	1	0	1	2	2	0	2	2	2	2	2	2	2	2	1	1	2	1	1	2	1	1	1	2	2	1
7108992|F|0-16:C>T-16:C>T	TGCAGACCCATTCTGTCCTTCACCATTTTTAGGATAAGCATTCAGTAGTTGCTGCACTGACTTCTACTG	TGCAGACCCATTCTGTCCTTCACCATTTTTAGGATAAGCATTCAGTAGTTGCTGCACTGACTTCTACTG	scaffold11297	728231	1	2.2033e-27	Chromosome08	32105960	1	2.4105e-27	16:C>T	16	0.957447	0.966667	0.211111	0.788889	0.033333	0.177778	0.064444	0.333086	0.198765	5.43519	4.30435	1	0	-	0	0	0	0	0	0	0	0	2	0	0	2	2	0	-	0	0	0	0	0	2	0	2
7111922|F|0-11:T>G-11:T>G	TGCAGACCCCGTTCAGATCTCTACATAAACCTCCCAGCTCTGCGAAAATTAGATAACATGCTTCTTGTA	TGCAGACCCCGTTCAGATCTCTACATAAACCTCCCAGCTCTGCGAAAATTAGATAACATGCTTCTTGTA	scaffold06549	3887	1	2.2033e-27	Chromosome09	21797597	1	2.4105e-27	11:T>G	11	1	0.361702	0.957447	0.042553	0.638298	0.319149	0.461747	0.081485	0.271616	6.4878	9.11607	1	1	0	2	1	1	1	2	1	2	1	1	0	1	2	1	1	1	1	1	1	2	1	1	1	2
7147339|F|0-67:C>T-67:C>T	TGCAGACCCCTCCTTACGATGATGCCATTGTTTTCTTTCCTAACGCAAATGGATGTGCTATAAATTCCC	TGCAGACCCCTCCTTACGATGATGCCATTGTTTTCTTTCCTAACGCAAATGGATGTGCTATAAATTCCC	scaffold07595	226022	1	4.73568e-29	Chromosome18	9901781	1	5.18104e-29	67:C>T	67	1	0.968085	0.553191	0.446809	0.031915	0.521277	0.061793	0.494341	0.278067	9.25439	6.10938	1	0	0	0	0	2	2	0	2	2	2	2	2	2	0	0	2	0	0	2	2	0	0	1	0	2
20110247|F|0-9:A>T-9:A>T	TGCAGACCCAATGGCCTGCGCCCAAAGCCACCATTGGTGTTGTGTTACTTTGAGAACCATTGGCCTAAA	TGCAGACCCAATGGCCTGCGCCCAAAGCCACCATTGGTGTTGTGTTACTTTGAGAACCATTGGCCTAAA	scaffold11106	312908	1	2.2033e-27	Chromosome07	534975	1	2.4105e-27	9:A>T	9	1	0.595745	0.946809	0.053191	0.404255	0.542553	0.481666	0.100724	0.291195	13.8406	17.5893	1	1	1	1	1	2	2	1	2	2	2	2	1	2	1	1	2	2	0	2	2	1	1	2	1	1
13855490|F|0-36:T>C-36:T>C	TGCAGACCCTCCTCAGCCACAGCCAACCTTCATCAATTCAGGCGAGAAGACTGCGCAGCAGCAATTGGA	TGCAGACCCTCCTCAGCCACAGCCAACCTTCATCAATTCAGGCGAGAAGACTGCGCAGCAGCAATTGGA	scaffold01497	134967	1	4.73568e-29	Chromosome05	8119393	1	5.18104e-29	36:T>C	36	1	0.989362	0.180851	0.819149	0.010638	0.170213	0.02105	0.296288	0.158669	14.3043	7	1	1	0	2	0	0	0	2	0	0	0	0	0	0	2	0	0	0	0	0	0	2	0	0	0	0
7111925|F|0-65:A>T-65:A>T	TGCAGACCCTTTACCTTGATATAACTATCCCAAACATCATTATCAGCTACAAACATGTGTTGAGTATCA	TGCAGACCCTTTACCTTGATATAACTATCCCAAACATCATTATCAGCTACAAACATGTGTTGAGTATCA	scaffold00847	2144885	1	2.2033e-27	Chromosome16	28145066	1	2.4105e-27	65:A>T	65	1	1	0.329787	0.670213	0	0.329787	0	0.442055	0.221028	11.8136	6.48718	1	2	2	0	2	0	0	2	0	0	0	0	0	0	0	2	0	0	0	0	0	2	2	0	2	0
7109843|F|0-38:T>A-38:T>A	TGCAGACCTGCCGTTGCATGCCATGACCTCATGGCCTCTGGACACGTGTACTAGCGAGGAGCTGGTGGG	TGCAGACCTGCCGTTGCATGCCATGACCTCATGGCCTCTGGACACGTGTACTAGCGAGGAGCTGGTGGG	scaffold03049	488588	1	2.2033e-27	Chromosome03	651612	1	2.4105e-27	38:T>A	38	1	0.670213	0.957447	0.042553	0.329787	0.62766	0.442055	0.081485	0.26177	9.3875	11.114	1	1	2	2	1	1	2	2	2	2	2	2	2	2	2	1	2	2	1	2	1	2	2	2	1	1
7119917|F|0-37:A>G-37:A>G	TGCAGACCTGGACAATATCTGATTCTGGTACTTGAGCACTACCACGAGCTTCCTGCTATCACCAATTAG	TGCAGACCTGGACAATATCTGATTCTGGTACTTGAGCACTACCACGAGCTTCCTGCTATCACCAATTAG	scaffold12118	238868	2	4.73568e-29	Chromosome16	23520042	2	5.18104e-29	37:A>G	37	1	1	0.031915	0.968085	0	0.031915	0	0.061793	0.030896	29.517	17	1	0	0	0	2	0	0	0	0	0	0	0	0	0	0	0	0	0	0	0	0	0	0	0	0	0
20485138|F|0-22:A>C-22:A>C	TGCAGACCTGTTAGATGCATAGATATACTTAGTTACTTGACCTTTTGTGCCTCCATTGTGAGATGCTGG	TGCAGACCTGTTAGATGCATAGATATACTTAGTTACTTGACCTTTTGTGCCTCCATTGTGAGATGCTGG	scaffold07528	375938	1	4.73568e-29	Chromosome13	5330950	1	5.18104e-29	22:A>C	22	1	0.638298	0.712766	0.287234	0.361702	0.351064	0.461747	0.409461	0.435604	9.13333	9.90588	1	2	0	2	2	2	1	0	1	2	1	1	0	1	0	0	1	1	2	2	1	0	2	1	2	0
7111933|F|0-14:A>G-14:A>G	TGCAGACCTTAGAAATAATGATCAAATTTGATGCTTTATGAAGACTAAAATGAGCAGGATAGATGAGGA	TGCAGACCTTAGAAATAATGATCAAATTTGATGCTTTATGAAGACTAAAATGAGCAGGATAGATGAGGA	scaffold06039	191160	1	4.73568e-29	Chromosome17	19652254	1	5.18104e-29	14:A>G	14	1	0.989362	0.170213	0.829787	0.010638	0.159574	0.02105	0.282481	0.151766	29.0513	17.0454	1	0	0	0	2	0	0	0	0	0	0	0	0	0	0	0	0	0	2	2	0	2	2	0	2	2
7119918|F|0-55:C>T-55:C>T	TGCAGACCTTCAGTTTACAAGACTGACGCTCTACCACTGAGCTATAGGGGCCACTCGATTTTACAGATC	TGCAGACCTTCAGTTTACAAGACTGACGCTCTACCACTGAGCTATAGGGGCCACTCGATTTTAC	scaffold09460	298546	1	9.31928e-26	Chromosome11	20038234	1	9.94056e-26	55:C>T	55	0.840426	0.506329	0.696203	0.303797	0.493671	0.202532	0.49992	0.423009	0.461465	16.9792	13.9254	1	1	-	2	-	2	1	0	1	-	1	-	0	1	0	1	1	1	-	1	2	0	0	0	-	0
7111935|F|0-34:A>C-34:A>C	TGCAGACCTTGAAGAAGTAACAAATATCTTTGCAAGAAGCTTGCGAAATCCACGTGTTCAAGGAGCCAT	TGCAGACCTTGAAGAAGTAACAAATATCTTTGCAAGAAGCTTGCGAAATCCACGTGTTCAAGGAGCCAT	scaffold08517	225541	1	4.73568e-29	Chromosome18	24314739	1	5.18104e-29	34:A>C	34	1	0.989362	0.106383	0.893617	0.010638	0.095745	0.02105	0.190131	0.105591	14.1367	7.66667	1	0	0	0	0	0	0	0	0	0	0	0	0	0	0	0	0	0	0	2	0	0	2	0	0	0
7111939|F|0-36:G>A-36:G>A	TGCAGACGAAAAGCGAAGCAGAAGGATTGCAAGAGTGCAAGAGGAATCCATGGCAAATGCAGCCAAAAT	TGCAGACGAAAAGCGAAGCAGAAGGATTGCAAGAGTGCAAGAGGAATCCATGGCAAATGCAGCCAAAAT	scaffold10493	574426	1	4.73568e-29	Chromosome16	25209975	1	5.18104e-29	36:G>A	36	1	0.893617	0.585106	0.414894	0.106383	0.478723	0.190131	0.485514	0.337823	19.8962	15.8906	1	2	0	0	0	0	2	2	2	1	2	0	0	0	0	0	2	0	0	0	0	0	1	2	0	2
7111949|F|0-21:C>T-21:C>T	TGCAGACGAGGCGAATGCGAACGGTGGTGCTTATGGGGGGTCCATTTATAGAGTTCTGGTGCGAGTGGC	TGCAGACGAGGCGAATGCGAACGGTGGTGCTTATGGGGGGTCCATTTATAGAGTTCTGGTGCGAGTGGC	scaffold08686	144815	1	4.73568e-29	Chromosome14	12665326	1	5.18104e-29	21:C>T	21	1	1	0.085106	0.914894	0	0.085106	0	0.155727	0.077863	11.5339	6.55556	1	0	0	0	0	2	0	0	0	0	0	0	0	0	0	0	0	0	0	0	0	0	0	0	0	0
7107173|F|0-33:T>A-33:T>A	TGCAGACGATGCTTTTCTTTGCCGGAGCTGTGATGAATCAGTTCATTCCGCTAACCAGTTAGCCAGGAG	TGCAGACGATGCTTTTCTTTGCCGGAGCTGTGATGAATCAGTTCATTCCGCTAACCAGTTAGCCAGGAG	scaffold06446	183884	1	4.76931e-24	Chromosome01	2051589	1	5.21783e-24	33:T>A	33	1	0.978723	0.606383	0.393617	0.021277	0.585106	0.041648	0.477365	0.259507	11.9224	7.08571	1	0	0	0	2	2	2	0	2	0	2	2	0	2	0	2	2	2	0	2	0	2	0	0	2	2
20471692|F|0-5:A>C-5:A>C	TGCAGACGATTATCTGATCCATGCAAAATACACCAGTTAGTGCTCGCCAAAGAAAGCCTCCTGCATCAT	TGCAGACGATTATCTGATCCATGCAAAATACACCAGTTAGTGCTCGCCAAAGAAAGCCTCCTGCATCAT	scaffold03581	456713	1	4.73568e-29	Chromosome05	1496607	1	5.18104e-29	5:A>C	5	1	0.989362	0.212766	0.787234	0.010638	0.202128	0.02105	0.334993	0.178022	5.88496	3.54167	1	2	0	0	0	0	0	2	0	0	0	0	1	0	0	0	0	0	0	0	0	2	0	0	0	0
13862425|F|0-15:T>C-15:T>C	TGCAGACGCACAACATAGCCAATTGGAACCCCGACTTCTCCCTACCTCGCCGAATCGACCAAAAATGAC	TGCAGACGCACAACATAGCCAATTGGAACCCCGACTTCTCCCTACCTCGCCGAATCGACCAAAAATGAC	scaffold06327	569231	1	4.73568e-29	Chromosome04	2660927	1	5.18104e-29	15:T>C	15	1	0.989362	0.148936	0.851064	0.010638	0.138298	0.02105	0.253508	0.137279	22.8879	13.7	1	2	0	1	0	0	0	2	0	0	0	0	0	0	2	0	0	0	2	0	0	2	0	0	0	0
7111950|F|0-8:C>T-8:C>T	TGCAGACGCAGTTTTGTGTCGTTGCCGCTGTGTGGCTATCAAACTATCAATTTCTATTCTTTATATACG	TGCAGACGCAGTTTTGTGTCGTTGCCGCTGTGTGGCTATCAAACTATCAATTTCTATTCTTTATATACG	scaffold03614	1192088	1	4.73568e-29	Chromosome09	25248478	1	5.18104e-29	8:C>T	8	1	0.978723	0.43617	0.56383	0.021277	0.414894	0.041648	0.491852	0.26675	15.9825	11.1923	1	1	0	0	2	0	0	2	0	0	0	0	0	2	0	2	0	2	2	0	0	2	1	2	2	2
13855494|F|0-28:A>C-28:A>C	TGCAGACGCGGCTAAGTAATCCAAGTGCAGCTGTTTTGTCAATGTCGATGAATGGTCAAAGCCTTCGCT	TGCAGACGCGGCTAAGTAATCCAAGTGCAGCTGTTTTGTCAATGTCGATGAATGGTCAAAGCCTTCGCT	scaffold00363	62312	1	4.73568e-29	Chromosome11	9554359	1	5.18104e-29	28:A>C	28	0.989362	0.978495	0.451613	0.548387	0.021505	0.430108	0.042086	0.495317	0.268702	12.2368	8.60784	1	0	0	0	0	2	2	0	2	0	2	2	0	0	2	0	2	0	0	2	1	0	0	0	0	2
7111952|F|0-16:A>T-16:A>T	TGCAGACGCGGTGGAGAGAGGTTGCCGCCGATAAGATAAGATTCTTTGGCCATGGACAAGAAAGAGATG	TGCAGACGCGGTGGAGAGAGGTTGCCGCCGATAAGATAAGATTCTTTGGCCATGGACAAGAAAGAGATG	scaffold04137	227707	1	2.2033e-27	Chromosome15	11878793	1	2.4105e-27	16:A>T	16	0.989362	0.494624	0.83871	0.16129	0.505376	0.333333	0.499942	0.270552	0.385247	10.2459	11.9286	1	2	1	2	2	2	1	0	1	2	1	2	2	1	2	0	1	1	2	1	2	0	2	1	0	1
13855495|F|0-30:A>G-30:A>G	TGCAGACGCTTTCCTCTTCGGTGTGCTTTCACCAAGCAAGCATAGAAGAGGGAGTATCTTTGCTTCGAC	TGCAGACGCTTTCCTCTTCGGTGTGCTTTCACCAAGCAAGCATAGAAGAGGGAGTATCTTTGCTTCGAC	scaffold11110	48151	1	4.73568e-29	Chromosome08	28429902	1	5.18104e-29	30:A>G	30	1	1	0.212766	0.787234	0	0.212766	0	0.334993	0.167497	13.9491	7.32	1	2	0	0	0	0	0	0	0	0	0	2	0	2	0	0	0	0	2	2	0	0	0	0	0	0
7111954|F|0-37:A>G-37:A>G	TGCAGACGGAACTATTTTAGGATACATGGAGAGTAAGAAAAATGTGGTTGGTGAAACGAATAAGGTTTT	TGCAGACGGAACTATTTTAGGATACATGGAGAGTAAGAAAAATGTGGTTGGTGAAACGAATAAGGTTTT	scaffold06871	591800	1	4.73568e-29	Chromosome01	23057587	1	5.18104e-29	37:A>G	37	1	0.904255	0.138298	0.861702	0.095745	0.042553	0.173155	0.238343	0.205749	23.4904	22.7778	1	0	0	0	1	0	0	0	0	1	0	0	0	0	0	1	0	0	0	0	0	1	0	0	1	0
7111867|F|0-7:G>A-7:G>A	TGCAGACGGAGTTTCTAATGGAGACTCAAACTCCATCTTAGATTGAGAACTTTGCAGTGGAGAGAATGA	TGCAGACGGAGTTTCTAATGGAGACTCAAACTCCATCTTAGATTGAGAACTTTGCAGTGGAGAGAATGA	scaffold02658	949890	1	4.73568e-29	Chromosome01	33135139	1	5.18104e-29	7:G>A	7	1	1	0.255319	0.744681	0	0.255319	0	0.380263	0.190131	8.76068	3.375	1	0	2	0	2	2	0	2	0	0	0	0	0	0	2	0	0	0	2	0	0	2	2	0	2	0
20488967|F|0-22:T>G-22:T>G	TGCAGACGGCAAAGTTACATCATCAGCAAAAGGAAAACAACCAAAACAAATATTATTCTAATATTCAAA	TGCAGACGGCAAAGTTACATCATCAGCAAAAGGAAAACAACCAAAACAAATATTATTCTAATATTCAAA	scaffold04305	157154	1	4.73568e-29	Chromosome09	23143163	1	5.18104e-29	22:T>G	22	0.925532	0.988506	0.034483	0.965517	0.011494	0.022989	0.022724	0.066587	0.044656	5.51852	3	1	0	0	2	0	0	0	0	0	0	0	0	0	0	0	0	0	0	0	0	0	0	0	0	-	0
7107177|F|0-53:C>T-53:C>T	TGCAGACGGTGCTCTGCCGCACGTGCTGTGCTCCTCAGAACACTCAGTTCGTGCTTCAGCACATGGATG	TGCAGACGGTGCTCTGCCGCACGTGCTGTGCTCCTCAGAACACTCAGTTCGTGCTTCAGCACATGGATG	scaffold07859	193658	1	2.2033e-27	Chromosome16	24430949	1	2.4105e-27	53:C>T	53	1	0.851064	0.37234	0.62766	0.148936	0.223404	0.253508	0.467406	0.360457	14.0606	11.5116	1	0	1	2	2	0	0	1	0	0	0	0	0	0	2	1	0	0	0	0	0	1	1	0	0	1
20485149|F|0-6:C>G-6:C>G	TGCAGACGTACTTGTTGTTATACATATCTGCACAAGGAGTATCATTTCCATATTGGGTCAGAAATACTG	TGCAGACGTACTTGTTGTTATACATATCTGCACAAGGAGTATCATTTCCATATTGGGTCAGAAATACTG	scaffold08420	111898	1	2.2033e-27	Chromosome11	267009	1	2.4105e-27	6:C>G	6	1	0.978723	0.106383	0.893617	0.021277	0.085106	0.041648	0.190131	0.11589	22.8017	15.8461	1	2	0	0	0	0	0	0	0	0	0	0	0	0	2	0	0	0	2	0	0	0	0	0	0	0
7143207|F|0-7:G>A-7:G>A	TGCAGACGTGGCAATAAACTGGCACTTAGTATTGCACTATCTAGTATGGTCTATTAGCCTTACAGATCG	TGCAGACGTGGCAATAAACTGGCACTTAGTATTGCACTATCTAGTATGGTCTATTAGCCTTAC	scaffold08477	109413	1	7.07401e-22	Chromosome11	127039	1	7.54064e-22	7:G>A	7	0.989362	0.935484	0.548387	0.451613	0.064516	0.483871	0.120708	0.495317	0.308012	8.45872	8.33846	1	2	0	2	0	0	2	0	2	0	2	2	2	1	2	0	2	0	2	2	2	0	0	1	0	0
7125717|F|0-27:G>A-27:G>A	TGCAGACGTGTTTGTTTGCACATGCACGTTTTATGAATCATGGCCATGCAATAGGTAAAAGATAAAAAA	TGCAGACGTGTTTGTTTGCACATGCACGTTTTATGAATCATGGCCATGCAATAGGTAAAAGATAAAAAA	scaffold11998	1161137	1	2.2033e-27	Chromosome05	5780647	1	2.4105e-27	27:G>A	27	0.93617	0.988636	0.079545	0.920455	0.011364	0.068182	0.022469	0.146436	0.084452	17.7615	11.2857	1	0	-	0	0	-	0	0	0	0	0	0	0	0	0	0	0	0	0	0	0	0	0	0	0	2
7107180|F|0-12:T>C-12:T>C	TGCAGACGTTACTCTGTACAGCACAAATAAGCTACATGAGAACTTGAGGACTAATATATATATCAAGAA	TGCAGACGTTACTCTGTACAGCACAAATAAGCTACATGAGAACTTGAGGACTAATATATATATCAAGAA	scaffold01551	534753	1	4.73568e-29	Chromosome15	3197991	1	5.18104e-29	12:T>C	12	1	0.989362	0.617021	0.382979	0.010638	0.606383	0.02105	0.472612	0.246831	10.3103	7.10959	1	0	2	2	2	2	2	2	2	0	2	0	1	2	0	0	2	2	0	0	0	2	0	2	2	0
13860844|F|0-6:C>T-6:C>T	TGCAGACGTTATATGTTAGAACTATGATGTGGCCTCGGAAGAATCGAGGAACACCATGTGGATACGTCT	TGCAGACGTTATATGTTAGAACTATGATGTGGCCTCGGAAGAATCGAGGAACACCATGTGGATACGTCT	scaffold06278	289168	1	2.2033e-27	Chromosome03	23196970	1	2.4105e-27	6:C>T	6	1	1	0.06383	0.93617	0	0.06383	0	0.119511	0.059756	22.3898	9.28571	1	0	0	0	0	0	0	0	0	0	0	0	2	0	0	0	0	0	0	0	0	0	0	0	0	0
7111962|F|0-45:G>T-45:G>T	TGCAGACTAAAAGCAGGCATAGAAATATATACCGAAGAGAAGAAGGGGAAGAAGAGAATTTCTCTTGCT	TGCAGACTAAAAGCAGGCATAGAAATATATACCGAAGAGAAGAAGGGGAAGAAGAGAATTTCTCTTGCT	scaffold09151	625893	1	1.0251e-25	Chromosome07	3251844	1	1.1215e-25	45:G>T	45	1	0.914894	0.62766	0.37234	0.085106	0.542553	0.155727	0.467406	0.311566	21.3704	18.4583	1	0	2	0	0	1	2	2	2	2	2	1	0	2	2	0	2	0	2	2	0	0	0	0	0	0
7119632|F|0-5:C>A-5:C>A	TGCAGCCTAAGGGAAGCCAGACCTATTGCCTGACCGGATACTCCCCGGAGCCGTCACCATCGCGCGGAT	TGCAGCCTAAGGGAAGCCAGACCTATTGCCTGACCGGATACTCCCCGGAGCCGTCACCATCGCGCGGAT	scaffold08265	3866465	1	2.2033e-27	Chromosome05	4211727	1	2.4105e-27	5:C>A	5	1	0.893617	0.43617	0.56383	0.106383	0.329787	0.190131	0.491852	0.340991	16.9065	12.3846	1	0	1	2	0	2	0	2	0	2	0	2	0	0	2	2	0	2	0	2	0	2	0	0	0	1
7147373|F|0-28:T>A-28:T>A	TGCAGACTAAGTATATTTAGCTCTCATGTGCTTTATTTGTTGCTTCGTTTCAAACACAAGTCCGAATGT	TGCAGACTAAGTATATTTAGCTCTCATGTGCTTTATTTGTTGCTTCGTTTCAAACACAAGTCCGAATGT	scaffold08003	368908	1	4.73568e-29	Chromosome14	22447975	1	5.18104e-29	28:T>A	28	1	1	0.202128	0.797872	0	0.202128	0	0.322544	0.161272	10.0085	4.65385	1	0	0	0	0	0	0	2	0	0	0	0	0	0	2	0	0	2	2	0	2	0	2	2	0	0
7125721|F|0-38:C>G-38:C>G	TGCAGACTAATTGAGGGACAGAAGCTATTTTTCTATGTCATCTTCCTTGTAAGGTTTTGTGAAATGTGA	TGCAGACTAATTGAGGGACAGAAGCTATTTTTCTATGTCATCTTCCTTGTAAGGTTTTGTGAAATGTGA	scaffold01664	72661	1	4.73568e-29	Chromosome09	7230201	1	5.18104e-29	38:C>G	38	0.978723	1	0.054348	0.945652	0	0.054348	0	0.102788	0.051394	13.6121	6.57143	1	2	0	0	0	0	0	0	0	0	0	0	0	0	0	2	0	0	0	0	0	0	0	0	0	0
7111965|F|0-59:G>A-59:G>A	TGCAGACTACGCTGTCTCGCACTTTTGTCATAAACTTCACAAGTGGGTCCGTACCCTTCGTCCGTTTAT	TGCAGACTACGCTGTCTCGCACTTTTGTCATAAACTTCACAAGTGGGTCCGTACCCTTCGTCCGTTTAT	scaffold03975	227899	1	2.2033e-27	Chromosome03	3590430	1	2.4105e-27	59:G>A	59	1	0.978723	0.308511	0.691489	0.021277	0.287234	0.041648	0.426664	0.234156	12.1739	7.38889	1	0	2	0	2	0	0	2	0	2	0	0	0	0	0	1	0	0	0	0	0	2	0	0	2	2
7111966|F|0-51:C>T-51:C>T	TGCAGACTACTACAAGGGCTATTTTGCTCGTGAACTCCGTGGAAAATCATACCTTGATGTGATAAGGAT	TGCAGACTACTACAAGGGCTATTTTGCTCGTGAACTCCGTGGAAAATCATACCTTGATGTGATAAGGAT	scaffold09120	352321	1	4.73568e-29	Chromosome17	20284425	1	5.18104e-29	51:C>T	51	1	0.968085	0.648936	0.351064	0.031915	0.617021	0.061793	0.455636	0.258714	18.2232	15.525	1	0	2	0	2	2	2	2	2	0	2	0	2	2	0	2	2	2	2	1	2	2	2	1	2	1
7110874|F|0-43:G>A-43:G>A	TGCAGACTACTTGTGCTTAGGGGACCATGTGTGGTGCAATGATGAAGCTTCAAGCTTGCGAGAGTGTGA	TGCAGACTACTTGTGCTTAGGGGACCATGTGTGGTGCAATGATGAAGCTTCAAGCTTGCGAGAGTGTGA	scaffold06697	117932	1	2.2033e-27	Chromosome15	12423835	1	2.4105e-27	43:G>A	43	0.946809	0.314607	0.865169	0.134831	0.685393	0.179775	0.431259	0.233304	0.332281	14.8649	21.3402	1	2	2	1	1	0	1	1	1	1	1	2	1	1	2	-	1	1	0	2	2	1	1	2	1	2
7111967|F|0-37:G>C-37:G>C	TGCAGACTAGAACGGCTTCTTATTCCAAGAAACTTCAGTGTCACTCAACAAAGACCAGATTACAGATCG	TGCAGACTAGAACGGCTTCTTATTCCAAGAAACTTCAGTGTCACTCAACAAAGACCAGATTAC	scaffold05375	138942	1	3.26801e-25	Chromosome09	23355300	1	3.48359e-25	37:G>C	37	1	1	0.106383	0.893617	0	0.106383	0	0.190131	0.095066	24.4576	13.25	1	0	0	0	0	0	0	0	0	0	0	0	0	0	2	0	0	0	0	0	0	2	0	0	0	2
7111968|F|0-65:T>A-65:T>A	TGCAGACTAGAATACATTGATACATTTGTTGTACAAATGCCAGACTGGAAATCCTAGGACCCAAGTGGA	TGCAGACTAGAATACATTGATACATTTGTTGTACAAATGCCAGACTGGAAATCCTAGGACCCAAGTGGA	scaffold12622	251363	1	4.73568e-29	Chromosome12	26210443	1	5.18104e-29	65:T>A	65	0.989362	1	0.16129	0.83871	0	0.16129	0	0.270552	0.135276	5.46957	2.9	1	0	0	0	0	0	0	0	0	0	0	2	0	0	2	2	0	0	0	0	0	2	2	0	0	0
7124240|F|0-28:G>T-28:G>T	TGCAGACTATAGCAATCTTACAAGATATGGTCAGGTTCAGTTTGATAATATCCAAAAGTGTTTACAGAT	TGCAGACTATAGCAATCTTACAAGATATGGTCAGGTTCAGTTTGATAATATCCAAAAGTGTTTAC	scaffold07301	221179	1	2.65588e-26	Chromosome05	200075	1	2.83471e-26	28:G>T	28	1	0.968085	0.351064	0.648936	0.031915	0.319149	0.061793	0.455636	0.258714	41.9561	28.6364	1	0	0	0	2	2	0	0	0	2	0	0	0	2	0	1	0	0	2	2	2	0	2	2	2	0
7147382|F|0-13:C>T-13:C>T	TGCAGACTATGCTCGTAGCTATAATGGCCTCCATTGCTTTAGGTGAAGAGTTCTACTTGGGAGGGTGAG	TGCAGACTATGCTCGTAGCTATAATGGCCTCCATTGCTTTAGGTGAAGAGTTCTACTTGGGAGGGTGAG	scaffold06512	505643	1	2.2033e-27	Chromosome02	7430295	1	2.4105e-27	13:C>T	13	1	1	0.031915	0.968085	0	0.031915	0	0.061793	0.030896	9.70339	4.5	1	0	0	0	0	0	0	0	0	0	0	0	0	0	0	0	0	2	0	0	0	0	0	0	0	0
7111969|F|0-49:C>T-49:C>T	TGCAGACTATGTATTTTGACTCAGGCAGAAGAATGATGTGCATCTATATCTTTTTTGTCACTTTTGTGA	TGCAGACTATGTATTTTGACTCAGGCAGAAGAATGATGTGCATCTATATCTTTTTTGTCACTTTTGTGA	scaffold11349	14329	1	4.73568e-29	Chromosome10	12858444	1	5.18104e-29	49:C>T	49	0.893617	0.892857	0.27381	0.72619	0.107143	0.166667	0.191327	0.397676	0.294501	18.8065	11.7	1	2	0	0	0	0	0	2	0	0	0	0	1	0	1	2	0	0	1	-	-	-	2	0	0	1
20471710|F|0-67:C>G-67:C>G	TGCAGACTATTCAGCTTTGAAGGGATTCATTTTGACAAACAAGCACTAGAGAATGCCAAATGAAGGACA	TGCAGACTATTCAGCTTTGAAGGGATTCATTTTGACAAACAAGCACTAGAGAATGCCAAATGAAGGACA	scaffold07478	925799	1	4.73568e-29	Chromosome14	10999420	1	5.18104e-29	67:C>G	67	1	1	0.074468	0.925532	0	0.074468	0	0.137845	0.068923	12.2881	5.88889	1	0	0	0	0	0	0	2	0	0	0	0	0	0	0	0	0	0	2	0	0	0	0	0	0	0
7119927|F|0-52:A>G-52:A>G	TGCAGACTATTGAAGTCCAACATGGATTGGTCTAATTTATTGCTTGCCATGCAGAATGCCTGTGGTGTC	TGCAGACTATTGAAGTCCAACATGGATTGGTCTAATTTATTGCTTGCCATGCAGAATGCCTGTGGTGTC	scaffold11069	518735	1	2.2033e-27	Chromosome08	1059972	1	2.4105e-27	52:A>G	52	1	0.893617	0.425532	0.574468	0.106383	0.319149	0.190131	0.488909	0.33952	28.3333	22.0196	1	0	2	1	0	0	0	1	0	2	0	0	2	0	2	2	0	0	2	0	0	2	2	0	1	0
7119929|F|0-57:T>A-57:T>A	TGCAGACTCAAAACAAGATACCAAGAAGGTCAATCAGGCAGCAAAGCAAAAGAAGCCTCAACCTGACGC	TGCAGACTCAAAACAAGATACCAAGAAGGTCAATCAGGCAGCAAAGCAAAAGAAGCCTCAACCTGACGC	scaffold03363	325801	1	4.73568e-29	Chromosome13	23894036	1	5.18104e-29	57:T>A	57	1	1	0.12766	0.87234	0	0.12766	0	0.222725	0.111363	29.3559	16	1	2	2	0	0	0	0	0	0	0	0	0	0	0	2	0	0	0	0	0	0	0	0	2	0	2
7125726|F|0-27:C>A-27:C>A	TGCAGACTCAGCCAGTAGAAACCCACGCAGAACATCTTTGTGATTGGCATTATACATCTTACAGATCGG	TGCAGACTCAGCCAGTAGAAACCCACGCAGAACATCTTTGTGATTGGCATTATACATCTTAC	scaffold01072	60673	1	1.14525e-24	Chromosome13	6249417	1	1.25293e-24	27:C>A	27	1	1	0.085106	0.914894	0	0.085106	0	0.155727	0.077863	28.1864	15.4	1	0	0	0	2	0	0	0	0	0	0	0	0	0	0	2	0	0	0	0	0	0	0	0	0	0
7119930|F|0-67:C>A-67:C>A	TGCAGACTCATAATAAGTACATTGTTGCTACTAGCAATGCTACATGGCAGAAGCAAGAGTATGCAAACC	TGCAGACTCATAATAAGTACATTGTTGCTACTAGCAATGCTACATGGCAGAAGCAAGAGTATGCAAACC	scaffold02815	99881	1	4.73568e-29	Chromosome13	6857915	1	5.18104e-29	67:C>A	67	1	1	0.074468	0.925532	0	0.074468	0	0.137845	0.068923	47.8559	23.2	1	0	2	0	0	0	0	0	0	0	0	0	0	0	0	2	0	0	0	0	0	0	2	0	0	2
7122672|F|0-16:T>C-16:T>C	TGCAGACTCATGGCCTTGCTGAATATATAGCTCAGGTGAGAACTATTTCCTTTCCCCTCTCCATATATG	TGCAGACTCATGGCCTTGCTGAATATATAGCTCAGGTGAGAACTATTTCCTTTCCCCTCTCCATATATG	scaffold11495	35186	1	4.73568e-29	Chromosome01	28208197	1	5.18104e-29	16:T>C	16	1	0.893617	0.510638	0.489362	0.106383	0.404255	0.190131	0.499774	0.344952	25.3925	19.9516	1	2	0	2	2	2	0	2	0	1	0	0	0	2	0	2	0	2	2	0	2	2	2	0	2	0
7111973|F|0-45:C>T-45:C>T	TGCAGACTCCATGCAAGGGTAAGATTGATAATTTGTGAAACTTGACGGGTGAAGGAGGACAGGTTGGCA	TGCAGACTCCATGCAAGGGTAAGATTGATAATTTGTGAAACTTGACGGGTGAAGGAGGACAGGTTGGCA	scaffold07520	2165699	1	4.73568e-29	Chromosome01	25788710	1	5.18104e-29	45:C>T	45	1	0.808511	0.382979	0.617021	0.191489	0.191489	0.309642	0.472612	0.391127	15.8511	12.9778	1	2	0	1	2	0	0	1	0	1	0	0	0	0	0	1	0	0	0	2	0	1	0	0	1	2
7143225|F|0-61:A>G-61:A>G	TGCAGACTCTAGCTTCTTTATACACAAGCCCTGTTCTGCAAAAATACCCATTTTCTGGGCTACAGTGCT	TGCAGACTCTAGCTTCTTTATACACAAGCCCTGTTCTGCAAAAATACCCATTTTCTGGGCTACAGTGCT	scaffold05899	126938	1	4.73568e-29	Chromosome03	6433337	1	5.18104e-29	61:A>G	61	1	1	0.06383	0.93617	0	0.06383	0	0.119511	0.059756	8.83898	4.71429	1	0	0	0	0	0	0	0	0	0	0	0	0	0	0	0	0	0	0	0	0	0	2	0	0	0
7119934|F|0-11:G>T-11:G>T	TGCAGACTCTCGATTCTTTATCATCCTGCGCTGCCTCCGCTCCACGACCACCTCCGGCGGACCATCAAT	TGCAGACTCTCGATTCTTTATCATCCTGCGCTGCCTCCGCTCCACGACCACCTCCGGCGGACCATCAAT	scaffold05859	546053	1	2.2033e-27	Chromosome11	26985016	1	2.4105e-27	11:G>T	11	1	0.925532	0.702128	0.297872	0.074468	0.62766	0.137845	0.418289	0.278067	8.63636	7.03659	1	0	1	2	2	2	2	2	2	2	2	0	2	0	0	0	2	2	0	0	2	2	0	2	2	0
13861896|F|0-14:C>T-14:C>T	TGCAGACTCTGAGTCCACTCAGTACGGAGTTCGAGTTCAATACAAGAGTTTCATTGAGATTACAGATCG	TGCAGACTCTGAGTCCACTCAGTACGGAGTTCGAGTTCAATACAAGAGTTTCATTGAGATTAC	scaffold12601	117443	1	3.26801e-25	Chromosome04	16747775	1	3.48359e-25	14:C>T	14	1	1	0.180851	0.819149	0	0.180851	0	0.296288	0.148144	22.0593	11.7727	1	0	0	0	0	0	0	2	0	2	0	0	0	0	2	0	0	0	0	0	0	2	0	0	2	0
7111979|F|0-28:G>T-28:G>T	TGCAGACTCTGTTGAGCGCTGCAATGACGAACCAGTACACTTGCCTTGATGGGTTTGCTTATACCAGAG	TGCAGACTCTGTTGAGCGCTGCAATGACGAACCAGTACACTTGCCTTGATGGGTTTGCTTATACCAGAG	scaffold04457	297763	1	4.73568e-29	Chromosome01	30839009	1	5.18104e-29	28:G>T	28	1	1	0.287234	0.712766	0	0.287234	0	0.409461	0.204731	5.50847	3.41667	1	0	0	2	2	2	0	2	0	0	0	0	2	0	2	0	0	0	2	0	0	2	2	0	2	0
7107186|F|0-49:A>T-49:A>T	TGCAGACTGAAAGTTTTCTGTGAGCTTTATGTGGAAGTGTACATGAAGAATTCAATCTCTGTTCTCTAT	TGCAGACTGAAAGTTTTCTGTGAGCTTTATGTGGAAGTGTACATGAAGAATTCAATCTCTGTTCTCTAT	scaffold07571	123143	1	4.73568e-29	Chromosome01	31917841	1	5.18104e-29	49:A>T	49	1	1	0.297872	0.702128	0	0.297872	0	0.418289	0.209144	18.8559	10.0526	1	0	2	0	2	2	0	2	0	0	0	0	2	0	2	0	0	0	2	0	0	2	2	0	2	0
7107187|F|0-49:T>C-49:T>C	TGCAGACTGAACGAAATTTCAAGAAAAGAAACTGAAATCAGACATTTTATAGCTTCTCATTTACAGATC	TGCAGACTGAACGAAATTTCAAGAAAAGAAACTGAAATCAGACATTTTATAGCTTCTCATTTAC	scaffold02906	240747	1	9.31928e-26	Chromosome01	29437014	1	9.94056e-26	49:T>C	49	1	1	0.276596	0.723404	0	0.276596	0	0.400181	0.200091	15.5847	10.4865	1	0	2	2	2	0	0	2	0	0	0	0	2	0	2	2	0	0	2	0	0	2	2	0	2	0
7143227|F|0-29:G>T-29:G>T	TGCAGACTGAGGTGGGTGAATTACTTGAGGCCAGATTTGAAGAGAGGGCAGATAACTCCACATGAAGAG	TGCAGACTGAGGTGGGTGAATTACTTGAGGCCAGATTTGAAGAGAGGGCAGATAACTCCACATGAAGAG	scaffold10563	1382467	1	2.2033e-27	Chromosome03	25191455	1	2.4105e-27	29:G>T	29	1	0.989362	0.297872	0.702128	0.010638	0.287234	0.02105	0.418289	0.21967	12.8034	7.91176	1	0	2	2	0	0	0	0	0	2	0	0	0	0	2	0	0	0	0	0	2	0	0	0	2	2
7122676|F|0-51:G>T-51:G>T	TGCAGACTGATTTTGTAAGGAGGACTTCAAGGAGAGAAAAGAGTCAACGCTGGTTAGGTCTCTTCTTCC	TGCAGACTGATTTTGTAAGGAGGACTTCAAGGAGAGAAAAGAGTCAACGCTGGTTAGGTCTCTTCTTCC	scaffold04251	207185	1	2.2033e-27	Chromosome15	9582388	1	2.4105e-27	51:G>T	51	1	0.968085	0.43617	0.56383	0.031915	0.404255	0.061793	0.491852	0.276822	14.2632	8.27451	1	0	1	2	2	0	0	2	0	2	0	0	2	0	0	2	0	0	0	0	0	2	0	2	2	2
7111985|F|0-25:C>T-25:C>T	TGCAGACTGCTTTGTTGTAGAATATCCCCTGAATGAAAGTGAAAGTTGCTATGTATCACGTCTAATATC	TGCAGACTGCTTTGTTGTAGAATATCCCCTGAATGAAAGTGAAAGTTGCTATGTATCACGTCTAATATC	scaffold02658	863800	1	4.73568e-29	Chromosome01	33048949	1	5.18104e-29	25:C>T	25	1	1	0.265957	0.734043	0	0.265957	0	0.390448	0.195224	17.7966	10.1471	1	0	2	0	2	2	0	2	0	0	0	0	0	0	2	0	0	0	2	0	0	2	2	0	2	0
7147417|F|0-38:C>T-38:C>T	TGCAGACTGGACAGGAGGTCACTGACTAGAGGATCAACCCTAGTACTGAGTGCACTAAGCTTCCCAAGT	TGCAGACTGGACAGGAGGTCACTGACTAGAGGATCAACCCTAGTACTGAGTGCACTAAGCTTCCCAAGT	scaffold03614	2324551	1	4.73568e-29	Chromosome09	26392399	1	5.18104e-29	38:C>T	38	1	1	0.138298	0.861702	0	0.138298	0	0.238343	0.119172	8.48305	5.11765	1	0	0	0	0	0	0	0	0	0	0	0	0	0	0	0	0	0	2	2	2	0	2	0	0	0
7111986|F|0-12:C>A-12:C>A	TGCAGACTGGAGCATACTGTTCATGTCTTCTGAGTGCATGGCCGATTTCTGCGGCTGCTGAGGATCAGA	TGCAGACTGGAGCATACTGTTCATGTCTTCTGAGTGCATGGCCGATTTCTGCGGCTGCTGAGGATCAGA	scaffold04457	902011	1	4.73568e-29	Chromosome01	30246786	1	5.18104e-29	12:C>A	12	1	1	0.287234	0.712766	0	0.287234	0	0.409461	0.204731	26.6949	16.7027	1	0	2	2	2	0	0	2	0	0	0	0	2	0	2	0	0	0	2	0	0	2	2	0	2	0
7122677|F|0-51:A>G-51:A>G	TGCAGACTGGCTAAGATCTGACAAGCGAGAAGATGATCTTGCAGGCCGTCCAGGGAGCATTGTTCAAGT	TGCAGACTGGCTAAGATCTGACAAGCGAGAAGATGATCTTGCAGGCCGTCCAGGGAGCATTGTTCAAGT	scaffold04182	19432	1	4.73568e-29	Chromosome11	25823056	1	5.18104e-29	51:A>G	51	1	0.957447	0.542553	0.457447	0.042553	0.5	0.081485	0.496378	0.288932	34.9646	25.7031	1	2	0	2	0	0	2	0	2	0	2	2	2	1	0	2	2	0	0	2	2	0	0	2	0	0
7107190|F|0-41:C>A-41:C>A	TGCAGACTGGGGAGAGAAGCTGCTAAACACAACATTAGGAGCAGGAGTGAGTGTGATTTTTTTTGAGAA	TGCAGACTGGGGAGAGAAGCTGCTAAACACAACATTAGGAGCAGGAGTGAGTGTGATTTTTTTTGAGAA	scaffold07873	262039	1	2.2033e-27	Chromosome01	4919346	1	2.4105e-27	41:C>A	41	0.989362	0.924731	0.408602	0.591398	0.075269	0.333333	0.139207	0.483293	0.31125	7.44954	5.7234	1	2	0	0	0	2	0	2	0	0	0	0	0	0	2	1	0	0	2	0	0	2	2	2	0	2
13858705|F|0-32:C>G-32:C>G	TGCAGACTGGTAAATATCCGGCATGGGAATTACTTCAATTCCATTGACAAAACCGTATGAATCTTCATA	TGCAGACTGGTAAATATCCGGCATGGGAATTACTTCAATTCCATTGACAAAACCGTATGAATCTTCATA	scaffold01945	1748	1	4.73568e-29	Chromosome03	28505218	1	5.18104e-29	32:C>G	32	1	0.989362	0.553191	0.446809	0.010638	0.542553	0.02105	0.494341	0.257696	20	15	1	2	2	0	0	0	2	0	2	2	2	2	0	0	2	0	2	2	0	2	2	0	0	2	2	2
7111988|F|0-31:G>A-31:G>A	TGCAGACTGGTTTGGATTTCAAAATCAGTGAGCCAGAAACAGCACGGTAGAATTTTGTTTCACATAAAA	TGCAGACTGGTTTGGATTTCAAAATCAGTGAGCCAGAAACAGCACGGTAGAATTTTGTTTCACATAAAA	scaffold03802	510250	1	2.2033e-27	Chromosome08	30182574	1	2.4105e-27	31:G>A	31	1	0.968085	0.351064	0.648936	0.031915	0.319149	0.061793	0.455636	0.258714	25.0351	17.05	1	0	0	2	2	0	0	2	0	0	0	0	2	0	2	0	0	0	0	0	0	1	2	0	0	2
20477885|F|0-61:C>G-61:C>G	TGCAGACTGTAGGGTCGGCTTGTGTGCATGAGTCATGTCAAATTATTTTATCACTGATTTGCCATATAG	TGCAGACTGTAGGGTCGGCTTGTGTGCATGAGTCATGTCAAATTATTTTATCACTGATTTGCCATATAG	scaffold02939	41969	1	2.2033e-27	Chromosome02	14519678	1	2.4105e-27	61:C>G	61	0.978723	0.978261	0.043478	0.956522	0.021739	0.021739	0.042533	0.083176	0.062854	3.21239	2.6	1	2	0	0	0	0	0	0	0	0	0	0	0	0	0	0	0	0	0	0	0	0	0	0	0	2
7142385|F|0-26:G>A-26:G>A	TGCAGACTGTATTTTGACACAGGCAGGAGACCAAGAATGCATCTATATCTTTTTTTTTTGTCATTTTTG	TGCAGACTGTATTTTGACACAGGCAGGAGACCAAGAATGCATCTATATCTTTTTTTTTTGTCATTTTTG	scaffold03363	1912	1	4.73568e-29	Chromosome13	24211199	1	5.18104e-29	26:G>A	26	0.93617	0.988636	0.068182	0.931818	0.011364	0.056818	0.022469	0.127066	0.074768	8.76852	7.57143	1	-	0	0	0	0	0	0	0	0	0	-	0	0	0	0	0	0	0	-	0	0	2	0	0	0
7107191|F|0-14:G>A-14:G>A	TGCAGACTGTGTTTGTCTATTGAATAATCAATAGCAATTATGCTAATGAAATATCAGAAACGCTGAACT	TGCAGACTGTGTTTGTCTATTGAATAATCAATAGCAATTATGCTAATGAAATATCAGAAACGCTGAACT	scaffold04760	26677	1	2.2033e-27	Chromosome01	13668713	1	2.4105e-27	14:G>A	14	1	0.904255	0.404255	0.595745	0.095745	0.308511	0.173155	0.481666	0.327411	9.80374	6.88	1	0	1	0	0	0	0	2	0	2	0	2	0	0	2	1	0	0	2	2	2	2	2	2	0	1
7107192|F|0-66:A>G-66:A>G	TGCAGACTGTTAGCAATGAAAATTCTGTCACAATGATGTCGCAAATTGCAATTTACGTAAACTCATATA	TGCAGACTGTTAGCAATGAAAATTCTGTCACAATGATGTCGCAAATTGCAATTTACGTAAACTCATATA	scaffold11651	16167	1	2.2033e-27	Chromosome03	5622131	1	2.4105e-27	66:A>G	66	1	0.93617	0.276596	0.723404	0.06383	0.212766	0.119511	0.400181	0.259846	22.375	14.8788	1	0	2	2	2	2	0	0	0	0	0	0	0	0	0	2	0	0	0	0	0	2	0	0	2	1
7111994|F|0-19:T>C-19:T>C	TGCAGACTGTTCAGAAGGATGGAACTAAAGGGGTGGTTTTTTTTGGATCTTTCTTGATGTGTCTAAGGA	TGCAGACTGTTCAGAAGGATGGAACTAAAGGGGTGGTTTTTTTTGGATCTTTCTTGATGTGTCTAAGGA	scaffold02831	356834	1	4.73568e-29	Chromosome03	11315493	1	5.18104e-29	19:T>C	19	1	0.840426	0.457447	0.542553	0.159574	0.297872	0.268221	0.496378	0.3823	9.59184	7.98113	1	0	2	2	0	0	0	2	0	1	0	0	1	0	0	1	0	0	2	0	0	1	1	2	0	2
7119946|F|0-53:G>A-53:G>A	TGCAGACTTACCTCTCATCAGCAGAGTTCAAAGAGAAATTTGGGATGGCAAAGGATGCCTTCTATAAGA	TGCAGACTTACCTCTCATCAGCAGAGTTCAAAGAGAAATTTGGGATGGCAAAGGATGCCTTCTATAAGA	scaffold03995	214075	2	4.73568e-29	Chromosome06	3728092	2	5.18104e-29	53:G>A	53	1	0.978723	0.62766	0.37234	0.021277	0.606383	0.041648	0.467406	0.254527	11.069	7.91892	1	2	0	0	0	2	2	0	2	2	2	0	2	2	0	0	2	2	2	2	2	0	2	0	2	0
7123693|F|0-68:A>G-68:A>G	TGCAGACTTACGATGGAAGTCGACGGCTCACTATTCACATCAGTCCGAGATGCTCGACGAGATGGAGAA	TGCAGACTTACGATGGAAGTCGACGGCTCACTATTCACATCAGTCCGAGATGCTCGACGAGATGGAGAA	scaffold11106	494872	1	1.70326e-28	Chromosome07	713758	1	1.86343e-28	68:A>G	68	0.882979	0.698795	0.457831	0.542169	0.301205	0.156627	0.420961	0.496444	0.458702	19.5417	20.0208	1	0	2	0	-	0	0	1	0	1	0	0	2	1	1	0	0	1	-	0	0	1	2	1	-	0
7107193|F|0-17:A>C-17:A>C	TGCAGACTTATCCACTCAAGCTCAGTTGCTGAAGTGAGATCTGGGAGACTCCTCAAGTGCACAGATTCA	TGCAGACTTATCCACTCAAGCTCAGTTGCTGAAGTGAGATCTGGGAGACTCCTCAAGTGCACAGATTCA	scaffold11897	284991	1	2.2033e-27	Chromosome18	10445370	1	2.4105e-27	17:A>C	17	1	0.585106	0.712766	0.287234	0.414894	0.297872	0.485514	0.409461	0.447488	10.5882	10.9529	1	1	1	1	1	1	0	1	0	2	0	2	0	2	1	1	0	0	2	2	2	1	1	2	1	1
7107194|F|0-15:G>A-15:G>A	TGCAGACTTATTGCCGACCCATCTTCTTGCAGCTGTGGTAACCCTTTTCCGGATTCCCATGTTTCCATG	TGCAGACTTATTGCCGACCCATCTTCTTGCAGCTGTGGTAACCCTTTTCCGGATTCCCATGTTTCCATG	scaffold01551	979951	1	4.73568e-29	Chromosome15	2738528	1	5.18104e-29	15:G>A	15	1	0.595745	0.914894	0.085106	0.404255	0.510638	0.481666	0.155727	0.318696	5.59155	8.34259	1	2	0	2	2	0	1	2	1	2	1	1	2	1	2	2	1	2	1	1	1	2	2	2	2	2
13860852|F|0-61:C>G-61:C>G	TGCAGACTTATTTCTGGACTTCATTTTGTTTCCGTGAATGCTGCTTTTATGTTCTCATGTTCTTTTCTT	TGCAGACTTATTTCTGGACTTCATTTTGTTTCCGTGAATGCTGCTTTTATGTTCTCATGTTCTTTTCTT	scaffold08265	769540	1	4.73568e-29	Chromosome12	28894844	1	5.18104e-29	61:C>G	61	1	1	0.180851	0.819149	0	0.180851	0	0.296288	0.148144	34.6525	20.3158	1	0	0	0	0	2	0	0	0	0	0	0	0	0	0	0	0	0	0	2	0	0	0	0	0	2
7107195|F|0-29:C>G-29:C>G	TGCAGACTTCAGTTGGCTGTCGATTTGTGCTTTCTTGATGTGGTCGTTGAATCAGATTGGCTGTTGATA	TGCAGACTTCAGTTGGCTGTCGATTTGTGCTTTCTTGATGTGGTCGTTGAATCAGATTGGCTGTTGATA	scaffold05005	138939	1	4.73568e-29	Chromosome06	13661177	1	5.18104e-29	29:C>G	29	0.957447	0.955556	0.333333	0.666667	0.044444	0.288889	0.084938	0.444444	0.264691	16.6542	9.4	1	0	0	2	2	0	0	2	0	2	0	0	0	0	1	2	0	2	0	0	2	0	2	-	2	0
7111999|F|0-59:C>A-59:C>A	TGCAGACTTCTCTGCACTCTACTGAATCTTCTGTTACAATCCGAGGTTGGCTATTGTTTCTTTTCTATA	TGCAGACTTCTCTGCACTCTACTGAATCTTCTGTTACAATCCGAGGTTGGCTATTGTTTCTTTTCTATA	scaffold10963	462948	1	2.2033e-27	Chromosome06	26824208	1	2.4105e-27	59:C>A	59	1	0.978723	0.276596	0.723404	0.021277	0.255319	0.041648	0.400181	0.220914	16.319	6.82759	1	0	0	2	0	2	0	2	0	0	0	0	0	0	0	0	0	0	0	0	0	0	0	0	0	0
20485184|F|0-62:C>G-62:C>G	TGCAGACTTCTGTTACATTTTTTTTCCTCTAGTAGTTCAGTTAGATCATAAGAGATAGAGCACAAGAGA	TGCAGACTTCTGTTACATTTTTTTTCCTCTAGTAGTTCAGTTAGATCATAAGAGATAGAGCACAAGAGA	scaffold11236	267487	1	2.2033e-27	Chromosome10	3737131	1	2.4105e-27	62:C>G	62	0.989362	1	0.053763	0.946237	0	0.053763	0	0.101746	0.050873	11.4701	5.8	1	0	0	0	0	0	0	0	0	0	0	0	0	0	0	0	0	0	0	0	0	0	0	0	0	0
7147427|F|0-65:G>T-65:G>T	TGCAGACTTCTTATTATGACGTCTATAAGCTCTTCCCACAAAAGCATCCATAACAATGTTATTTTGCAA	TGCAGACTTCTTATTATGACGTCTATAAGCTCTTCCCACAAAAGCATCCATAACAATGTTATTTTGCAA	scaffold01027	136339	1	4.73568e-29	Chromosome03	13166840	1	5.18104e-29	65:G>T	65	1	1	0.106383	0.893617	0	0.106383	0	0.190131	0.095066	12.0847	5.30769	1	0	0	2	0	0	0	0	0	0	0	0	0	0	0	0	0	0	2	0	0	2	2	0	0	0
7112000|F|0-68:A>G-68:A>G	TGCAGACTTGAACCGTACGGGAGAGGAGGCGAATAAGACAGCAGTGAGCAAGAAATGTCACACACAGTA	TGCAGACTTGAACCGTACGGGAGAGGAGGCGAATAAGACAGCAGTGAGCAAGAAATGTCACACACAGTA	scaffold05019	215905	1	2.2033e-27	Chromosome03	27284055	1	2.4105e-27	68:A>G	68	1	1	0.117021	0.882979	0	0.117021	0	0.206655	0.103327	13.6949	6.64286	1	0	0	2	0	0	0	2	0	0	0	0	0	0	0	0	0	0	0	0	0	0	2	0	0	0
7119951|F|0-5:T>A-5:T>A	TGCAGTCTTGACTTTTGGGAAAATACAAAAGCTGGTGGCTGATTGGTCCCTAAACCGAAGAGGCATAAC	TGCAGTCTTGACTTTTGGGAAAATACAAAAGCTGGTGGCTGATTGGTCCCTAAACCGAAGAGGCATAAC	scaffold08799	55552	1	2.2033e-27	Chromosome17	24013379	1	2.4105e-27	5:T>A	5	1	0.191489	0.957447	0.042553	0.808511	0.148936	0.309642	0.081485	0.195564	7.41667	10.8761	1	1	1	0	1	1	1	2	1	2	1	1	2	1	2	2	1	1	1	1	1	1	1	1	1	2
7122679|F|0-54:T>A-54:T>A	TGCAGACTTGATAGCAGCTGCCTCCTCCTGATAGGTTCATAGTAACAAAGACACTTGTAATCAGACGAC	TGCAGACTTGATAGCAGCTGCCTCCTCCTGATAGGTTCATAGTAACAAAGACACTTGTAATCAGACGAC	scaffold05133	47236	1	4.73568e-29	Chromosome08	284572	1	5.18104e-29	54:T>A	54	1	0.968085	0.212766	0.787234	0.031915	0.180851	0.061793	0.334993	0.198393	16.087	8.68	1	0	2	0	2	0	0	0	0	2	0	0	0	0	0	2	0	0	0	0	0	2	0	0	0	2
7122477|F|0-35:C>G-35:C>G	TGCAGACTTGATGAAGACTTGCAATCATTTGACACCACTCTCCAAGTTCGTACCAATCATGTTTTACAG	TGCAGACTTGATGAAGACTTGCAATCATTTGACACCACTCTCCAAGTTCGTACCAATCATGTTTTACAG	scaffold08799	59029	1	1.0251e-25	Chromosome17	24009902	1	1.1215e-25	35:C>G	35	1	0.819149	0.776596	0.223404	0.180851	0.595745	0.296288	0.34699	0.321639	38.0206	36.1087	1	1	1	0	0	1	2	2	2	2	2	2	2	2	2	2	2	0	2	2	0	2	0	1	2	0
7142387|F|0-54:A>T-54:A>T	TGCAGACTTGCCCAGACTATACCCAGTTCCACAGAATATGATGCTCCAGACCTTAGTTCATTCAAATAT	TGCAGACTTGCCCAGACTATACCCAGTTCCACAGAATATGATGCTCCAGACCTTAGTTCATTCAAATAT	scaffold05230	16637	1	4.73568e-29	Chromosome02	14388092	1	5.18104e-29	54:A>T	54	1	1	0.085106	0.914894	0	0.085106	0	0.155727	0.077863	37.5932	20.3	1	0	0	0	0	0	0	0	0	2	0	0	0	0	0	0	0	0	0	0	0	0	0	0	2	0
20492833|F|0-47:T>C-47:T>C	TGCAGACTTGCGTTTTTGGTCATCCAGATCAAGAACTGCACTTTTTTTGTCCTCTTTTCATCCTTGATT	TGCAGACTTGCGTTTTTGGTCATCCAGATCAAGAACTGCACTTTTTTTGTCCTCTTTTCATCCTTGATT	scaffold08122	27698	1	4.73568e-29	Chromosome11	13801678	1	5.18104e-29	47:T>C	47	1	1	0.159574	0.840426	0	0.159574	0	0.268221	0.13411	24.2712	14.7895	1	0	0	0	0	2	0	2	0	0	0	0	2	0	0	0	0	0	0	0	0	2	0	0	0	0
13855508|F|0-40:T>C-40:T>C	TGCAGACTTGGAAAATATACAAGAAGATTGAAAATACCATTAGAACCAGATGAAGGATCAACGTTATCT	TGCAGACTTGGAAAATATACAAGAAGATTGAAAATACCATTAGAACCAGATGAAGGATCAACGTTATCT	scaffold02906	283814	1	4.73568e-29	Chromosome01	29480030	1	5.18104e-29	40:T>C	40	1	1	0.106383	0.893617	0	0.106383	0	0.190131	0.095066	12.1525	6	1	0	0	0	0	2	0	0	0	0	0	0	0	0	0	0	0	2	2	0	0	0	0	0	0	0
7107197|F|0-60:C>A-60:C>A	TGCAGACTTGTAGCTAGTTATAGGCTTATACCATTCAGCACTCTCACTCTGAAGAGGAATCCTTTTGTT	TGCAGACTTGTAGCTAGTTATAGGCTTATACCATTCAGCACTCTCACTCTGAAGAGGAATCCTTTTGTT	scaffold03252	97714	1	2.2033e-27	Chromosome04	21597957	1	2.4105e-27	60:C>A	60	1	0.989362	0.393617	0.606383	0.010638	0.382979	0.02105	0.477365	0.249208	12.094	7.32609	1	0	2	2	0	2	0	2	0	2	0	2	2	0	0	2	0	2	0	0	0	0	0	0	0	0
7112002|F|0-35:C>T-35:C>T	TGCAGACTTTATCACAAAGTTTGATATGAAAATCTCATTGTTTAGGAAGTCAATTTTATATTTTACAGA	TGCAGACTTTATCACAAAGTTTGATATGAAAATCTCATTGTTTAGGAAGTCAATTTTATATTTTACAGA	scaffold07595	206469	1	7.92447e-27	Chromosome18	9921342	1	8.66972e-27	35:C>T	35	0.989362	1	0.11828	0.88172	0	0.11828	0	0.208579	0.10429	27.4188	15.0769	1	0	0	0	0	2	0	0	0	2	0	0	0	0	0	0	0	0	0	0	0	0	0	0	0	0
20485189|F|0-45:C>T-45:C>T	TGCAGACTTTCAAGAATGTCATAACTCACCAGAAACCATATAAATCGGGTTCAAAAGATAGGCTTACTG	TGCAGACTTTCAAGAATGTCATAACTCACCAGAAACCATATAAATCGGGTTCAAAAGATAGGCTTACTG	scaffold08127	241681	1	2.2033e-27	Chromosome16	5918964	1	2.4105e-27	45:C>T	45	0.989362	0.064516	0.967742	0.032258	0.935484	0.032258	0.120708	0.062435	0.091571	9	10.8407	1	1	1	1	1	1	1	1	1	2	1	1	1	1	1	0	1	1	1	1	1	2	1	1	1	1
20503987|F|0-9:T>C-9:T>C	TGCAGACTTTGCATCATTGGCAAATGAGCTTGACAAGGATACGGAGAATAAAAAATGTGGGCAAGTTTG	TGCAGACTTTGCATCATTGGCAAATGAGCTTGACAAGGATACGGAGAATAAAAAATGTGGGCAAGTTTG	scaffold08000	20776	1	4.73568e-29	Chromosome09	22923716	1	5.18104e-29	9:T>C	9	1	1	0.095745	0.904255	0	0.095745	0	0.173155	0.086578	10.1017	5.2	1	0	0	0	0	0	0	0	0	0	0	0	0	0	0	0	0	0	0	0	0	0	0	0	2	0
13858709|F|0-9:T>C-9:T>C	TGCAGACTTTGTCAGCTGGGTATAGTGGAACTCAATTTGAAGCCTGTGATGAATAGGTGTTGATGGTAT	TGCAGACTTTGTCAGCTGGGTATAGTGGAACTCAATTTGAAGCCTGTGATGAATAGGTGTTGATGGTAT	scaffold12865	544619	1	4.73568e-29	Chromosome10	7520296	1	5.18104e-29	9:T>C	9	1	1	0.159574	0.840426	0	0.159574	0	0.268221	0.13411	23	11.45	1	0	0	0	0	2	0	0	0	0	0	2	0	0	0	0	0	0	2	0	2	0	0	2	0	0
13855510|F|0-18:T>C-18:T>C	TGCAGACTTTTCATCATATCAGTAAACAGAATGTCCAAAGCTATGAGAGGGAGGCACAAAATAAGATGA	TGCAGACTTTTCATCATATCAGTAAACAGAATGTCCAAAGCTATGAGAGGGAGGCACAAAATAAGATGA	scaffold03581	888785	1	4.73568e-29	Chromosome05	1928635	1	5.18104e-29	18:T>C	18	1	1	0.404255	0.595745	0	0.404255	0	0.481666	0.240833	20.1017	13.9348	1	2	0	0	0	0	2	0	2	0	2	0	2	2	0	0	2	0	0	0	2	0	0	0	0	0
7107201|F|0-65:A>G-65:A>G	TGCAGAGAAAAAAGAAGGGAAATACAAGGGAAAGAGGGCTTTTTATACTCTCTTTTTGTAATAAAAAAT	TGCAGAGAAAAAAGAAGGGAAATACAAGGGAAAGAGGGCTTTTTATACTCTCTTTTTGTAATAAAAAAT	scaffold03802	909013	1	2.85015e-26	Chromosome08	29291034	1	3.11819e-26	65:A>G	65	0.861702	0.962963	0.049383	0.950617	0.037037	0.012346	0.071331	0.093888	0.082609	9.08163	7.4	1	0	-	0	0	0	0	0	0	0	0	-	0	0	0	0	0	0	0	0	0	2	0	0	-	0
7147448|F|0-32:T>A-32:T>A	TGCAGAGAAAAATAGAAGGCCAAAGTAAATATTGAAATGGATATACTTTTGCCCATTTGATCTTTTATT	TGCAGAGAAAAATAGAAGGCCAAAGTAAATATTGAAATGGATATACTTTTGCCCATTTGATCTTTTATT	scaffold12794	324475	1	4.73568e-29	Chromosome06	22050804	1	5.18104e-29	32:T>A	32	1	1	0.042553	0.957447	0	0.042553	0	0.081485	0.040742	6.02564	3.25	1	0	0	0	0	0	0	0	0	0	0	0	0	0	0	0	0	0	0	0	0	0	2	0	0	0
20471766|F|0-39:C>A-39:C>A	TGCAGAGAAAACTACCTTATTTTATATACAAGTACCTGACTTGCCTTTGAGCATCCAAAGGAAGGCAAT	TGCAGAGAAAACTACCTTATTTTATATACAAGTACCTGACTTGCCTTTGAGCATCCAAAGGAAGGCAAT	scaffold06814	881501	1	4.73568e-29	Chromosome02	14965096	1	5.18104e-29	39:C>A	39	1	1	0.06383	0.93617	0	0.06383	0	0.119511	0.059756	16.2542	6.71429	1	0	0	0	0	0	0	0	0	0	0	0	0	0	0	0	0	0	0	0	0	0	2	0	0	0
7143235|F|0-29:A>G-29:A>G	TGCAGAGAAAATGGGTACCTCTGCTTTTTATCTTCCCCTCTTTCATTGATTCAATGTGTATGACTGGGG	TGCAGAGAAAATGGGTACCTCTGCTTTTTATCTTCCCCTCTTTCATTGATTCAATGTGTATGACTGGGG	scaffold06039	127566	1	4.73568e-29	Chromosome17	19586211	1	5.18104e-29	29:A>G	29	1	0.989362	0.148936	0.851064	0.010638	0.138298	0.02105	0.253508	0.137279	11.3504	6.57895	1	0	0	0	2	0	0	0	0	0	0	0	0	0	0	0	0	0	2	2	0	0	2	0	2	2
7112010|F|0-33:T>C-33:T>C	TGCAGAGAAACAAAACTACTATAGAAAAGTAAATAATATTCCACTGGAGACAAAGAAGAAAACTGCCGA	TGCAGAGAAACAAAACTACTATAGAAAAGTAAATAATATTCCACTGGAGACAAAGAAGAAAACTGCCGA	scaffold07873	228362	1	2.2033e-27	Chromosome01	4885878	1	2.4105e-27	33:T>C	33	1	0.946809	0.265957	0.734043	0.053191	0.212766	0.100724	0.390448	0.245586	16.8839	14.5517	1	2	0	0	0	0	0	2	0	0	0	0	0	0	0	1	0	0	0	0	0	0	2	0	0	0
20110253|F|0-10:C>G-10:C>G	TGCAGAGAAACAATGGCGGAAAGGAGGAGAGAAAATGCTTCTCGAAGAGAGGGAGAAGTGAATTGGCTT	TGCAGAGAAACAATGGCGGAAAGGAGGAGAGAAAATGCTTCTCGAAGAGAGGGAGAAGTGAATTGGCTT	scaffold05948	29738	1	4.73568e-29	Chromosome05	8713136	1	5.18104e-29	10:C>G	10	1	0.989362	0.180851	0.819149	0.010638	0.170213	0.02105	0.296288	0.158669	15.7009	8.22727	1	2	0	2	0	0	0	2	0	0	0	0	0	0	2	0	0	0	0	0	0	2	0	0	0	0
7112011|F|0-53:G>T-53:G>T	TGCAGAGAAACCAAGCTGCGAAACGAATTCTAAAAAATCTCACATTATATGTGGTGAAATACCACAAAA	TGCAGAGAAACCAAGCTGCGAAACGAATTCTAAAAAATCTCACATTATATGTGGTGAAATACCACAAAA	scaffold03614	1273158	1	4.73568e-29	Chromosome09	25329499	1	5.18104e-29	53:G>T	53	0.989362	1	0.075269	0.924731	0	0.075269	0	0.139207	0.069603	23.0855	12.875	1	0	0	0	0	0	0	0	0	0	0	0	0	0	0	0	0	0	0	0	0	0	2	0	0	0
7142241|F|0-10:C>T-10:C>T	TGCAGAGAAACCGAGTTATTGGAGATACAAACAGACTAGATAGTTCAAGAATTGGTCTAGCAACATATA	TGCAGAGAAACCGAGTTATTGGAGATACAAACAGACTAGATAGTTCAAGAATTGGTCTAGCAACATATA	scaffold09876	95467	1	4.73568e-29	Chromosome14	4200163	1	5.18104e-29	10:C>T	10	1	1	0.031915	0.968085	0	0.031915	0	0.061793	0.030896	19.7797	13.6667	1	0	0	0	0	0	0	0	0	0	0	0	0	0	0	0	0	0	0	0	0	0	0	0	0	0
7147456|F|0-58:A>C-58:A>C	TGCAGAGAAACCTAGTGATCGATATTATAAGGCTGCAAAAGTAGCCTCAGCTTTTGAAAGAGATATACA	TGCAGAGAAACCTAGTGATCGATATTATAAGGCTGCAAAAGTAGCCTCAGCTTTTGAAAGAGATATACA	scaffold00080	367844	1	4.73568e-29	Chromosome05	590971	1	5.18104e-29	58:A>C	58	1	1	0.404255	0.595745	0	0.404255	0	0.481666	0.240833	9.58475	6.63043	1	2	0	0	0	0	2	0	2	0	2	0	0	2	0	0	2	0	0	0	2	2	0	0	0	0
7147459|F|0-10:C>T-10:C>T	TGCAGAGAAACTCCCAAGCCTGTCTATACATTCATGGACAACTTCTTGGAATCTGTCATGTCTGAATCC	TGCAGAGAAACTCCCAAGCCTGTCTATACATTCATGGACAACTTCTTGGAATCTGTCATGTCTGAATCC	scaffold10980	251950	1	4.73568e-29	Chromosome04	6314772	1	5.18104e-29	10:C>T	10	0.989362	1	0.182796	0.817204	0	0.182796	0	0.298763	0.149381	9.06838	4.77273	1	0	0	0	0	0	0	2	0	2	0	0	0	0	2	0	0	0	0	0	0	2	0	0	2	0
7110694|F|0-59:C>T-59:C>T	TGCAGAGAAAGAGACCCTGGAAACTAAGGGACAAGCATTAGGACATTGACATGAAATGTCTTTGCCTTT	TGCAGAGAAAGAGACCCTGGAAACTAAGGGACAAGCATTAGGACATTGACATGAAATGTCTTTGCCTTT	scaffold03079	39899	1	2.2033e-27	Chromosome01	5330200	1	2.4105e-27	59:C>T	59	1	1	0.180851	0.819149	0	0.180851	0	0.296288	0.148144	24.7712	12.65	1	2	2	0	0	0	0	0	0	0	0	0	0	0	0	2	0	0	0	0	0	0	0	0	0	0
7112017|F|0-27:G>C-27:G>C	TGCAGAGAAAGCACGAGGAATTTATTCGCATTGAAGAAGTGTGGAATATGCTTTACAATGATTGCATTT	TGCAGAGAAAGCACGAGGAATTTATTCGCATTGAAGAAGTGTGGAATATGCTTTACAATGATTGCATTT	scaffold02871	65179	1	4.73568e-29	Chromosome03	5403542	1	5.18104e-29	27:G>C	27	1	0.968085	0.234043	0.765957	0.031915	0.202128	0.061793	0.358533	0.210163	8.62609	4.44444	1	0	2	2	0	0	0	0	0	0	0	0	0	0	0	2	0	0	0	0	0	2	2	0	0	2
7112019|F|0-20:T>A-20:T>A	TGCAGAGAAAGGGCTTGGCTTTGGATTTAGTCACCCTTATAAGCATTCTCCCTATATATTGCGACTCTG	TGCAGAGAAAGGGCTTGGCTTTGGATTTAGTCACCCTTATAAGCATTCTCCCTATATATTGCGACTCTG	scaffold03060	156150	1	2.2033e-27	Chromosome13	25210064	1	2.4105e-27	20:T>A	20	1	0.425532	0.829787	0.170213	0.574468	0.255319	0.488909	0.282481	0.385695	7.29412	9.06186	1	2	0	2	1	1	1	2	1	0	1	1	2	1	0	0	1	1	1	1	1	2	2	1	2	1
7112020|F|0-20:A>C-20:A>C	TGCAGAGAAAGTGTTCATACAGTGAGAGAGTTCAGGAAATTGTATGGACTTCTGAGAATGGGAAGTAGA	TGCAGAGAAAGTGTTCATACAGTGAGAGAGTTCAGGAAATTGTATGGACTTCTGAGAATGGGAAGTAGA	scaffold07330	109228	1	4.73568e-29	Chromosome01	6332953	1	5.18104e-29	20:A>C	20	1	1	0.244681	0.755319	0	0.244681	0	0.369624	0.184812	10.4153	5.96429	1	2	2	0	0	0	0	0	0	0	0	0	0	0	2	2	0	0	0	0	0	2	0	0	0	2
20493362|F|0-44:G>A-44:G>A	TGCAGAGAAAGTTATTGTTATTGACTATAAGCCCACAACTGTTCGCCTCTAAATTGTGAGGGTAATAGA	TGCAGAGAAAGTTATTGTTATTGACTATAAGCCCACAACTGTTCGCCTCTAAATTGTGAGGGTAATAGA	scaffold04151	512871	1	4.73568e-29	Chromosome04	24933538	1	5.18104e-29	44:G>A	44	1	1	0.085106	0.914894	0	0.085106	0	0.155727	0.077863	7.54237	4.6	1	2	0	2	0	0	0	0	0	0	0	0	0	0	0	0	0	0	0	0	0	0	0	0	0	0
7107204|F|0-56:G>A-56:G>A	TGCAGAGAAATAAGAACAAAATACAACTTGAAGAAAGTCAAAAGAAGAGTTCTGTCGAAAGAGAGAACA	TGCAGAGAAATAAGAACAAAATACAACTTGAAGAAAGTCAAAAGAAGAGTTCTGTCGAAAGAGAGAACA	scaffold03079	84109	1	4.73568e-29	Chromosome01	5285282	1	5.18104e-29	56:G>A	56	1	0.893617	0.691489	0.308511	0.106383	0.585106	0.190131	0.426664	0.308397	7.29245	6.28916	1	2	2	2	2	0	2	0	2	1	2	0	0	2	0	0	2	2	2	2	2	2	2	2	1	0
13858715|F|0-65:A>T-65:A>T	TGCAGAGAAATTTTCCCAATCACACAATCTTTCCACACAACAACTGCTTGATGCCTAACATGCTCAATC	TGCAGAGAAATTTTCCCAATCACACAATCTTTCCACACAACAACTGCTTGATGCCTAACATGCTCAATC	scaffold09086	59705	1	4.73568e-29	Chromosome08	23694477	1	5.18104e-29	65:A>T	65	1	1	0.053191	0.946809	0	0.053191	0	0.100724	0.050362	24.2966	11.8333	1	0	0	0	0	0	0	0	0	0	0	0	0	0	0	0	0	0	0	0	0	2	0	0	0	0
7122684|F|0-60:A>T-60:A>T	TGCAGAGAACAAAAGAGTCGAGGACAGCTTCAAAGCCAAAAGAGGAACACCTGCACCACTAGTTGCTGC	TGCAGAGAACAAAAGAGTCGAGGACAGCTTCAAAGCCAAAAGAGGAACACCTGCACCACTAGTTGCTGC	scaffold06598	225349	1	2.2033e-27	Chromosome16	586618	1	2.4105e-27	60:A>T	60	1	0.553191	0.904255	0.095745	0.446809	0.457447	0.494341	0.173155	0.333748	11.9682	16.1204	1	1	2	2	2	2	1	2	1	1	1	2	1	1	2	1	1	1	1	2	1	2	0	1	2	2
13855250|F|0-66:A>C-66:A>C	TGCAGAGAACAAAGAGGGATTATGTATAAAATGGCATGATGATGTAAAAGCAGAGAGAGAGAGAAGAGG	TGCAGAGAACAAAGAGGGATTATGTATAAAATGGCATGATGATGTAAAAGCAGAGAGAGAGAGAAGAGG	scaffold08359	1097886	1	4.73568e-29	Chromosome14	7265057	1	5.18104e-29	66:A>C	66	1	0.978723	0.12766	0.87234	0.021277	0.106383	0.041648	0.222725	0.132187	17.4087	10.4375	1	0	0	0	0	0	0	0	0	0	0	0	2	0	0	1	0	0	0	0	0	2	2	0	0	0
7107207|F|0-51:T>C-51:T>C	TGCAGAGAACACACTCTATAAACGAGGTCTGTAATGAAGTGACTAAATTGATTTATTGTATATGCACTT	TGCAGAGAACACACTCTATAAACGAGGTCTGTAATGAAGTGACTAAATTGATTTATTGTATATGCACTT	scaffold01158	72909	1	2.2033e-27	Chromosome07	10768446	1	2.4105e-27	51:T>C	51	0.93617	0.5	0.875	0.125	0.5	0.375	0.5	0.21875	0.359375	10.386	11.2268	1	1	1	1	1	1	2	1	2	2	2	2	1	2	1	2	2	0	1	2	0	1	0	0	1	1
7112025|F|0-36:A>T-36:A>T	TGCAGAGAACACAGAGAAGGGTCTTTACTTCCTTTCAAATCTTGATCAGAACATTGCAGTGATAGTTCG	TGCAGAGAACACAGAGAAGGGTCTTTACTTCCTTTCAAATCTTGATCAGAACATTGCAGTGATAGTTCG	scaffold01701	276033	1	4.73568e-29	Chromosome06	23083375	1	5.18104e-29	36:A>T	36	1	0.946809	0.680851	0.319149	0.053191	0.62766	0.100724	0.434586	0.267655	19.2232	15.4691	1	0	0	0	2	2	2	2	2	2	2	2	0	0	2	2	2	0	1	2	2	0	2	2	2	0
7143237|F|0-55:A>T-55:A>T	TGCAGAGAACACTAACACAAAAGTATGTATCATGCATGCACACATAATTTCTTGGAATTTGTATTAGCT	TGCAGAGAACACTAACACAAAAGTATGTATCATGCATGCACACATAATTTCTTGGAATTTGTATTAGCT	scaffold06631	652259	1	4.73568e-29	Chromosome06	934407	1	5.18104e-29	55:A>T	55	1	1	0.159574	0.840426	0	0.159574	0	0.268221	0.13411	17.6695	10.4737	1	0	2	2	0	0	0	2	0	0	0	0	0	0	0	0	0	0	0	0	0	2	0	0	0	0
7143238|F|0-33:T>C-33:T>C	TGCAGAGAACCCCACAAATGAAACAAACCTTGATAGTTGTATAGCCAATGACTCTCAGTCTGAAGATAG	TGCAGAGAACCCCACAAATGAAACAAACCTTGATAGTTGTATAGCCAATGACTCTCAGTCTGAAGATAG	scaffold07238	545373	1	4.73568e-29	Chromosome02	12738812	1	5.18104e-29	33:T>C	33	1	0.712766	0.56383	0.43617	0.287234	0.276596	0.409461	0.491852	0.450656	16.6626	10.8551	1	2	1	1	2	1	0	1	0	2	0	0	2	0	1	1	0	2	2	2	0	1	1	0	2	2
7119963|F|0-53:C>T-53:C>T	TGCAGAGAACTACGTTCTAAAGTTGTGTTACAATTTTATGCAGGGACGAGAAGCTTTGTCTGCTTTACA	TGCAGAGAACTACGTTCTAAAGTTGTGTTACAATTTTATGCAGGGACGAGAAGCTTTGTCTGCTTTACA	scaffold06631	739589	1	6.12599e-28	Chromosome06	845736	1	6.7021e-28	53:C>T	53	1	0.87234	0.351064	0.648936	0.12766	0.223404	0.222725	0.455636	0.339181	18.0971	12.1905	1	0	2	0	1	0	0	0	0	2	0	0	0	0	2	0	0	0	2	2	2	0	1	0	1	2
7112031|F|0-40:A>G-40:A>G	TGCAGAGAACTATTTCTGAACATTTACATATATTGTGGACATGTGGCCCACCCATCTGCCCAAACGCCC	TGCAGAGAACTATTTCTGAACATTTACATATATTGTGGACATGTGGCCCACCCATCTGCCCAAACGCCC	scaffold12525	286933	1	4.73568e-29	Chromosome11	1997725	1	5.18104e-29	40:A>G	40	1	1	0.031915	0.968085	0	0.031915	0	0.061793	0.030896	8.40678	5.66667	1	0	0	0	0	0	0	0	0	0	0	0	0	0	0	0	0	0	0	0	0	0	0	0	0	2
20110254|F|0-40:T>C-40:T>C	TGCAGAGAACTGCTCCGAAGCAATATACCGGTATATGTGGTCTCCTAAACAAGCTCTCCCATTCTGAAA	TGCAGAGAACTGCTCCGAAGCAATATACCGGTATATGTGGTCTCCTAAACAAGCTCTCCCATTCTGAAA	scaffold08265	2369980	1	4.73568e-29	Chromosome07	24926435	1	5.18104e-29	40:T>C	40	0.978723	1	0.076087	0.923913	0	0.076087	0	0.140595	0.070298	11.1897	5.11111	1	0	0	2	0	0	0	0	0	0	0	0	0	0	0	0	0	2	0	0	0	0	0	0	0	2
7144710|F|0-40:A>G-40:A>G	TGCAGAGAACTGTACTGCATGGCATTGACTTGAGCTCTAAAGGAGATGCTGAGGATAAATATTTACAGA	TGCAGAGAACTGTACTGCATGGCATTGACTTGAGCTCTAAAGGAGATGCTGAGGATAAATATTTACAGA	scaffold06656	530057	1	3.6869e-25	Chromosome06	19225849	1	4.03363e-25	40:A>G	40	0.861702	0.876543	0.234568	0.765432	0.123457	0.111111	0.21643	0.359092	0.287761	24.1556	23.3043	1	0	0	0	2	1	0	0	0	0	0	0	0	0	0	0	0	0	2	-	1	0	0	-	0	0
7112032|F|0-43:A>G-43:A>G	TGCAGAGAACTGTGAAGGAGATTTTCAGATCTAAATCATGAAGAAAAAAATTTTCAAAAAAACTTGTAA	TGCAGAGAACTGTGAAGGAGATTTTCAGATCTAAATCATGAAGAAAAAAATTTTCAAAAAAACTTGTAA	scaffold01508	380042	1	4.73568e-29	Chromosome10	26097513	1	5.18104e-29	43:A>G	43	0.989362	0.967742	0.107527	0.892473	0.032258	0.075269	0.062435	0.19193	0.127182	7.30088	4.58333	1	0	0	1	0	0	0	2	0	0	0	0	0	0	0	0	0	0	0	0	0	0	0	0	0	0
7143242|F|0-23:G>T-23:G>T	TGCAGAGAAGAGCATCTTCCGGGGTCTACTAGCAAAATTTTGGGGTGAGGTTTTGCAACATGTTGGATC	TGCAGAGAAGAGCATCTTCCGGGGTCTACTAGCAAAATTTTGGGGTGAGGTTTTGCAACATGTTGGATC	scaffold06582	516879	1	4.73568e-29	Chromosome15	8611624	1	5.18104e-29	23:G>T	23	1	0.914894	0.648936	0.351064	0.085106	0.56383	0.155727	0.455636	0.305681	7.79817	5.97436	1	0	0	2	0	2	2	0	2	0	2	1	0	2	2	2	2	2	2	2	2	2	2	2	0	0
7147482|F|0-54:G>A-54:G>A	TGCAGAGAAGAGTTTTGACATGGAGGAGGGAACTCTTGAGATTGGAATGGGTGAGTTCTTGCTTCTTCT	TGCAGAGAAGAGTTTTGACATGGAGGAGGGAACTCTTGAGATTGGAATGGGTGAGTTCTTGCTTCTTCT	scaffold02943	475767	2	4.73568e-29	Chromosome18	822645	2	5.18104e-29	54:G>A	54	0.989362	1	0.064516	0.935484	0	0.064516	0	0.120708	0.060354	7.98291	4.71429	1	0	0	0	0	0	0	0	0	0	0	0	0	0	0	2	0	0	0	0	0	0	0	0	0	0
7119964|F|0-7:A>G-7:A>G	TGCAGAGAAGCTCAAGTAAAATGACTCCATAGCTGTATACATCAACTTTCTCCGTCAATCGGGTGGCAT	TGCAGAGAAGCTCAAGTAAAATGACTCCATAGCTGTATACATCAACTTTCTCCGTCAATCGGGTGGCAT	scaffold00069	56060	1	4.73568e-29	Chromosome01	6813659	1	5.18104e-29	7:A>G	7	1	1	0.06383	0.93617	0	0.06383	0	0.119511	0.059756	10.4746	3.57143	1	0	2	0	0	0	0	0	0	0	0	0	0	0	0	0	0	0	0	0	0	0	0	0	0	0
7145752|F|0-49:T>C-49:T>C	TGCAGAGAAGCTGAAAGACTTCAATCATTCCCAGTTTTCTCATTCGCTGTTGCTTTGGTTCCACCTCTT	TGCAGAGAAGCTGAAAGACTTCAATCATTCCCAGTTTTCTCATTCGCTGTTGCTTTGGTTCCACCTCTT	scaffold04056	220517	1	2.2033e-27	Chromosome03	4868394	1	2.4105e-27	49:T>C	49	1	0.87234	0.755319	0.244681	0.12766	0.62766	0.222725	0.369624	0.296175	8.98058	8.32222	1	2	2	0	2	0	2	2	2	1	2	2	0	2	0	1	2	2	2	1	0	2	2	2	2	2
13855517|F|0-62:T>A-62:T>A	TGCAGAGAAGCTTGCCTCCTCTCCCATCAACTCAGCCAATTTACTCCAATCTTCTCATCATCTTCTTCA	TGCAGAGAAGCTTGCCTCCTCTCCCATCAACTCAGCCAATTTACTCCAATCTTCTCATCATCTTCTTCA	scaffold08359	1535109	1	4.73568e-29	Chromosome14	6823265	1	5.18104e-29	62:T>A	62	0.989362	0.935484	0.290323	0.709677	0.064516	0.225806	0.120708	0.412071	0.266389	14.5636	8.62162	1	0	0	2	0	0	0	2	0	0	0	0	2	2	0	2	0	2	1	0	2	2	0	2	0	0
7112046|F|0-44:T>A-44:T>A	TGCAGAGAAGGAAAAGAATTGATTTGGCTCATCAAATTACCATTTTCAGAAGGTAAAGCTTCCGACTTG	TGCAGAGAAGGAAAAGAATTGATTTGGCTCATCAAATTACCATTTTCAGAAGGTAAAGCTTCCGACTTG	scaffold10563	163975	1	4.73568e-29	Chromosome03	26416990	1	5.18104e-29	44:T>A	44	1	1	0.085106	0.914894	0	0.085106	0	0.155727	0.077863	34.4153	19.25	1	0	0	0	0	0	0	0	0	0	0	0	0	0	0	0	0	0	0	0	0	0	0	0	0	0
7110773|F|0-24:A>G-24:A>G	TGCAGAGAAGGAGAGAAGAAAAGGAGGAGAGGAGAGAGATAAGGGACATGCCTGTTATGAGAGCAACAG	TGCAGAGAAGGAGAGAAGAAAAGGAGGAGAGGAGAGAGATAAGGGACATGCCTGTTATGAGAGCAACAG	scaffold03025	165698	1	4.73568e-29	Chromosome11	7760922	1	5.18104e-29	24:A>G	24	1	0.659574	0.702128	0.297872	0.340426	0.361702	0.449072	0.418289	0.43368	19.0759	18.6914	1	0	2	0	0	2	1	0	1	0	1	1	0	1	2	2	1	2	0	2	1	0	2	2	0	2
20493384|F|0-27:A>G-27:A>G	TGCAGAGAAGGAGGTCTCATTTATCAAAGGAGGATCCATAATCCTGTCAGGGATTGTGGTTCATTAGAG	TGCAGAGAAGGAGGTCTCATTTATCAAAGGAGGATCCATAATCCTGTCAGGGATTGTGGTTCATTAGAG	scaffold12564	59604	1	4.73568e-29	Chromosome14	5877159	1	5.18104e-29	27:A>G	27	1	1	0.042553	0.957447	0	0.042553	0	0.081485	0.040742	13.2627	7.71429	1	0	0	0	0	0	0	0	0	2	0	0	0	0	0	2	0	0	0	0	0	2	0	0	0	0
20110255|F|0-7:A>C-7:A>C	TGCAGAGAAGGTCGGTGAAGCAATCGGAGCACGGCAGTGACATGATCGCCGTCGATGGTTTCTCATTCT	TGCAGAGAAGGTCGGTGAAGCAATCGGAGCACGGCAGTGACATGATCGCCGTCGATGGTTTCTCATTCT	scaffold11495	972037	2	4.73568e-29	Chromosome01	29126666	2	5.18104e-29	7:A>C	7	1	1	0.06383	0.93617	0	0.06383	0	0.119511	0.059756	11.1441	5.375	1	2	0	0	0	0	0	0	0	0	0	0	0	0	0	0	0	0	0	2	0	0	0	0	0	0
7107214|F|0-51:T>G-51:T>G	TGCAGAGAAGTCACCCTGGAGAGGAATCTCTCCCTGGAAAATTGTGATCAATAAATATTTATTCAGATT	TGCAGAGAAGTCACCCTGGAGAGGAATCTCTCCCTGGAAAATTGTGATCAATAAATATTTATTCAGATT	scaffold08582	91604	1	2.2033e-27	Chromosome12	2662782	1	2.4105e-27	51:T>G	51	1	0.893617	0.521277	0.478723	0.106383	0.414894	0.190131	0.499095	0.344613	9.21698	7.5	1	1	0	2	0	2	0	2	0	0	0	2	2	2	0	0	0	0	1	2	0	0	0	2	2	1
7125776|F|0-21:A>G-21:A>G	TGCAGAGAAGTTTCAGCATCAAAAACTTTCTTCAGTCTTATTTTCCTACCAACCAAATAGCTTCCCTCA	TGCAGAGAAGTTTCAGCATCAAAAACTTTCTTCAGTCTTATTTTCCTACCAACCAAATAGCTTCCCTCA	scaffold08265	3008979	1	4.73568e-29	Chromosome05	5070775	1	5.18104e-29	21:A>G	21	0.925532	0.896552	0.206897	0.793103	0.103448	0.103448	0.185493	0.328181	0.256837	12.3636	9.18182	1	0	0	0	0	0	0	0	0	0	0	2	0	-	2	1	0	1	0	0	0	0	0	0	0	0
7112048|F|0-62:G>A-62:G>A	TGCAGAGAATAAGCACGATGTGGGTAATTTAGAAATGAAAAAATCTTTTCAGCTTTTTGATAGAATCGA	TGCAGAGAATAAGCACGATGTGGGTAATTTAGAAATGAAAAAATCTTTTCAGCTTTTTGATAGAATCGA	scaffold03213	67111	1	4.73568e-29	Chromosome09	3770741	1	5.18104e-29	62:G>A	62	0.989362	0.365591	0.860215	0.139785	0.634409	0.225806	0.463869	0.24049	0.352179	6.39535	8.55446	1	0	1	2	2	1	1	1	1	0	1	2	1	1	1	2	1	1	2	0	1	1	1	1	2	2
7112050|F|0-26:C>T-26:C>T	TGCAGAGAATAGTTCCATAGGTATTTCGCAAAAGGCCAGTGCATGCCCCTGATTTCATGAGGGACCACC	TGCAGAGAATAGTTCCATAGGTATTTCGCAAAAGGCCAGTGCATGCCCCTGATTTCATGAGGGACCACC	scaffold05745	87277	1	4.73568e-29	Chromosome17	2499450	1	5.18104e-29	26:C>T	26	1	0.93617	0.329787	0.670213	0.06383	0.265957	0.119511	0.442055	0.280783	15.4954	10.5476	1	0	2	2	2	0	0	2	0	2	0	0	2	0	2	1	0	0	2	0	0	1	0	0	1	1
7107216|F|0-46:A>T-46:A>T	TGCAGAGAATATGAAAATTCAAGTCCAGAATAACAAAGAGAGTATAAGCAAATTCTACCTCAAGGATTG	TGCAGAGAATATGAAAATTCAAGTCCAGAATAACAAAGAGAGTATAAGCAAATTCTACCTCAAGGATTG	scaffold05206	50148	1	4.73568e-29	Chromosome03	21866318	1	5.18104e-29	46:A>T	46	1	1	0.12766	0.87234	0	0.12766	0	0.222725	0.111363	17.7288	8.5625	1	0	0	0	0	0	0	0	0	2	0	0	0	0	2	0	0	0	0	0	2	0	0	2	0	2
7109874|F|0-32:T>G-32:T>G	TGCAGAGAATCCCTTATCAACCATTTCATCAATAAGTTGTGATGCTTTTGGTACATCCTCATGCCTGAG	TGCAGAGAATCCCTTATCAACCATTTCATCAATAAGTTGTGATGCTTTTGGTACATCCTCATGCCTGAG	scaffold03219	73556	9	4.73568e-29	Chromosome13	592519	9	5.18104e-29	32:T>G	32	1	1	0.659574	0.340426	0	0.659574	0	0.449072	0.224536	17.7034	6.10526	1	0	2	2	2	2	2	0	2	2	2	0	0	2	0	2	2	2	0	0	0	2	0	0	2	2
7107217|F|0-48:T>G-48:T>G	TGCAGAGAATCCCTTATCAACCATTTCATCAATAAGTTGCAAAGCTTTTGGTACATCCTCATGATTACA	TGCAGAGAATCCCTTATCAACCATTTCATCAATAAGTTGCAAAGCTTTTGGTACATCCTCATGATTACA	scaffold03219	189530	8	6.12599e-28	Chromosome13	714396	8	6.7021e-28	48:T>G	48	0.914894	0.569767	0.662791	0.337209	0.430233	0.232558	0.490265	0.446998	0.468632	10.4921	7.92857	1	0	2	2	2	1	1	0	1	0	1	-	0	1	0	2	1	1	0	-	-	2	0	0	2	2
7122690|F|0-58:T>C-58:T>C	TGCAGAGAATCGATCCATTCATTGAAGAGATTCTGATCACGGCTGCCCATGTCACTTTTTACGAATTTA	TGCAGAGAATCGATCCATTCATTGAAGAGATTCTGATCACGGCTGCCCATGTCACTTTTTACGAATTTA	scaffold02892	241735	1	2.2033e-27	Chromosome09	6886120	1	2.4105e-27	58:T>C	58	1	0.702128	0.925532	0.074468	0.297872	0.62766	0.418289	0.137845	0.278067	14.0952	16.4673	1	2	2	1	2	1	2	2	2	0	2	0	0	2	2	2	2	1	2	1	1	2	1	2	0	1
7112056|F|0-40:C>A-40:C>A	TGCAGAGAATCTATCTTTGAACATTGTTAGTCTGGCTTGGCAAACAATCAAATGGGTTTTCAGAAGGAA	TGCAGAGAATCTATCTTTGAACATTGTTAGTCTGGCTTGGCAAACAATCAAATGGGTTTTCAGAAGGAA	scaffold01755	25516	1	4.73568e-29	Chromosome07	20485760	1	5.18104e-29	40:C>A	40	1	1	0.202128	0.797872	0	0.202128	0	0.322544	0.161272	26.8136	15.5926	1	0	2	2	0	0	0	2	0	0	0	0	0	0	2	0	0	2	2	0	0	2	0	2	0	0
7112057|F|0-43:T>G-43:T>G	TGCAGAGAATCTCAAGCTGTCTACAGAAGAGCTATCTTACCAGTATAGCAATACTCGCCGAGAAGAGCC	TGCAGAGAATCTCAAGCTGTCTACAGAAGAGCTATCTTACCAGTATAGCAATACTCGCCGAGAAGAGCC	scaffold06914	396743	1	4.73568e-29	Chromosome07	1292246	1	5.18104e-29	43:T>G	43	1	0.968085	0.648936	0.351064	0.031915	0.617021	0.061793	0.455636	0.258714	13.1913	11.8553	1	0	0	0	2	0	2	0	2	2	2	2	0	2	0	0	2	2	2	2	2	0	2	2	2	0
7112060|F|0-27:G>A-27:G>A	TGCAGAGAATGAGCGTGGGAAGAATATGGAAGCTGCAAAGTTGTTATCTCTCCATGAGAAAATTATTCA	TGCAGAGAATGAGCGTGGGAAGAATATGGAAGCTGCAAAGTTGTTATCTCTCCATGAGAAAATTATTCA	scaffold02895	77988	1	2.2033e-27	Chromosome05	26557204	1	2.4105e-27	27:G>A	27	1	0.957447	0.276596	0.723404	0.042553	0.234043	0.081485	0.400181	0.240833	10.469	6.5	1	0	2	0	0	0	0	2	0	0	0	0	0	0	0	0	0	0	0	0	0	0	0	0	0	0
7112061|F|0-39:T>G-39:T>G	TGCAGAGAATGGAGTCCAAACAGAAGATTCCCAAATGTTTGTGGGTGAGGAATATAACAAAGATTGATT	TGCAGAGAATGGAGTCCAAACAGAAGATTCCCAAATGTTTGTGGGTGAGGAATATAACAAAGATTGATT	scaffold06914	1187024	1	4.73568e-29	Chromosome07	2082043	1	5.18104e-29	39:T>G	39	1	0.93617	0.691489	0.308511	0.06383	0.62766	0.119511	0.426664	0.273087	5.89091	4.5	1	2	1	2	0	0	2	2	2	0	2	1	2	2	2	2	2	0	0	2	2	2	2	0	0	2
7106775|F|0-43:C>G-43:C>G	TGCAGAGAATTATGTAGAGGAGCATATGATTTCCAAACAGCTGCAATGCATCCGATATTCTCTCATGTC	TGCAGAGAATTATGTAGAGGAGCATATGATTTCCAAACAGCTGCAATGCATCCGATATTCTCTCATGTC	scaffold10173	240582	1	2.2033e-27	Chromosome15	10954653	1	2.4105e-27	43:C>G	43	1	0.255319	0.882979	0.117021	0.744681	0.138298	0.380263	0.206655	0.293459	10.6	11.6019	1	1	1	1	1	1	1	2	1	0	1	1	1	1	1	0	1	1	0	1	1	0	2	1	1	1
7117748|F|0-10:A>T-10:A>T	TGCAGAGAATACAGGAGAAGCAAGGAACACCAGCAAAACCATCAGTTCCTGTTGATGTCTACGTTTTCG	TGCAGAGAATACAGGAGAAGCAAGGAACACCAGCAAAACCATCAGTTCCTGTTGATGTCTACGTTTTCG	scaffold05859	596534	1	2.2033e-27	Chromosome11	27035037	1	2.4105e-27	10:A>T	10	1	0.87234	0.797872	0.202128	0.12766	0.670213	0.222725	0.322544	0.272635	26.4667	23.163	1	0	1	2	2	2	2	2	2	2	2	0	2	0	0	0	2	2	0	0	2	2	2	2	2	2
20498674|F|0-55:C>T-55:C>T	TGCAGAGAATTTCGAGTGCTTCTACCATGATCAACACCCTATCTATTTCACATGACAAATTCTTTGCTA	TGCAGAGAATTTCGAGTGCTTCTACCATGATCAACACCCTATCTATTTCACATGACAAATTCTTTGCTA	scaffold12262	176838	1	4.73568e-29	Chromosome04	23380739	1	5.18104e-29	55:C>T	55	1	0.925532	0.468085	0.531915	0.074468	0.393617	0.137845	0.497963	0.317904	26.8349	10.8983	1	2	2	1	2	2	0	2	0	0	0	2	2	0	2	2	0	0	2	0	2	1	2	0	2	0
7112065|F|0-43:G>C-43:G>C	TGCAGAGAATTTTCCCTTGCATTTGATTCTGCCAACAAAGGTGGCCAACGTTCTTCTCCAAGGACAACG	TGCAGAGAATTTTCCCTTGCATTTGATTCTGCCAACAAAGGTGGCCAACGTTCTTCTCCAAGGACAACG	scaffold12794	776728	1	4.73568e-29	Chromosome06	21602559	1	5.18104e-29	43:G>C	43	1	0.734043	0.606383	0.393617	0.265957	0.340426	0.390448	0.477365	0.433907	11.2442	10.5972	1	1	2	2	2	0	1	0	1	2	1	1	0	2	0	0	1	1	0	2	2	0	0	2	0	0
7139179|F|0-44:T>G-44:T>G	TGCAGAGACAAAAGAAAAGAAATGGAATCCAACGTCCACGCGCTTCCCACGCTCCAGTTGACACTGAAA	TGCAGAGACAAAAGAAAAGAAATGGAATCCAACGTCCACGCGCTTCCCACGCTCCAGTTGACACTGAAA	scaffold07760	11274	1	2.2033e-27	Chromosome12	28285368	1	2.4105e-27	44:T>G	44	1	1	0.074468	0.925532	0	0.074468	0	0.137845	0.068923	22.0763	9.7	1	0	0	0	0	0	0	0	0	0	0	0	0	0	0	0	0	2	2	0	2	0	0	0	0	0
7110884|F|0-49:G>T-49:G>T	TGCAGAGACAAAAGAAGATGAGGAAAAGGGAGAAGGAACTACAACTTCTGATCATATCTTTTGCTTCTC	TGCAGAGACAAAAGAAGATGAGGAAAAGGGAGAAGGAACTACAACTTCTGATCATATCTTTTGCTTCTC	scaffold07665	27868	2	2.2033e-27	Chromosome08	24043302	2	2.4105e-27	49:G>T	49	1	0.340426	0.957447	0.042553	0.659574	0.297872	0.449072	0.081485	0.265278	16.8781	21.4821	1	1	0	0	1	1	1	2	1	1	1	1	2	1	2	1	1	2	1	1	1	2	2	2	1	2
7112069|F|0-15:C>A-15:C>A	TGCAGAGACAAGGTGCTGATTTCCATTCTCAATTGATATATTGTGTCCAATTCAATTGTAATGAGGAGG	TGCAGAGACAAGGTGCTGATTTCCATTCTCAATTGATATATTGTGTCCAATTCAATTGTAATGAGGAGG	scaffold02996	53538	1	4.73568e-29	Chromosome18	122348	1	2.4105e-27	15:C>A	15	0.989362	0.946237	0.548387	0.451613	0.053763	0.494624	0.101746	0.495317	0.298532	10.0991	7.67742	1	0	0	0	2	1	2	0	2	0	2	0	0	2	0	0	2	0	2	2	0	0	0	2	2	2
7112071|F|0-19:G>A-19:G>A	TGCAGAGACACATAAATGTGTACAGTACACAGTGACAAGTTTCCTTAGTTTAGTTCCCTTTTGTCTTGA	TGCAGAGACACATAAATGTGTACAGTACACAGTGACAAGTTTCCTTAGTTTAGTTCCCTTTTGTCTTGA	scaffold03352	69656	1	4.73568e-29	Chromosome05	6851951	1	5.18104e-29	19:G>A	19	1	0.957447	0.446809	0.553191	0.042553	0.404255	0.081485	0.494341	0.287913	21.823	13.7547	1	2	1	0	2	2	0	2	0	2	0	0	0	0	2	0	0	2	0	2	2	0	0	0	2	0
20493397|F|0-13:C>T-13:C>T	TGCAGAGACACTACTGAACGTTCCTCAATCACTGTCCGGCGACTGTGCATCATCAGCCAAGGATTGCAG	TGCAGAGACACTACTGAACGTTCCTCAATCACTGTCCGGCGACTGTGCATCATCAGCCAAGGATTGCAG	scaffold01633	29799	1	4.73568e-29	Chromosome06	27670100	1	5.18104e-29	13:C>T	13	0.957447	0.988889	0.055556	0.944444	0.011111	0.044444	0.021975	0.104938	0.063457	4.55357	2.83333	1	0	0	0	0	0	0	0	0	0	0	0	0	0	0	0	0	0	0	0	0	0	2	0	0	0
7112074|F|0-49:A>G-49:A>G	TGCAGAGACAGTAGTTTTCACTGAAATGCTATTTTATCTCTAGCAAGTCATACACTTTCAGGTTGATTC	TGCAGAGACAGTAGTTTTCACTGAAATGCTATTTTATCTCTAGCAAGTCATACACTTTCAGGTTGATTC	scaffold06908	137957	1	2.2033e-27	Chromosome10	1702328	1	2.4105e-27	49:A>G	49	0.989362	1	0.193548	0.806452	0	0.193548	0	0.312175	0.156087	10.6581	5.79167	1	2	0	2	0	0	0	2	0	0	0	0	2	0	2	0	0	0	0	0	0	0	0	0	2	0
7109878|F|0-17:A>C-17:A>C	TGCAGAGACAGTTTCATATCAGAAAGCCAGCAATCACCATTGGAGGGTGCTTTCTGTTGCTATAGGTGT	TGCAGAGACAGTTTCATATCAGAAAGCCAGCAATCACCATTGGAGGGTGCTTTCTGTTGCTATAGGTGT	scaffold05780	246926	1	2.2033e-27	Chromosome16	5567141	1	2.4105e-27	17:A>C	17	1	0.957447	0.446809	0.553191	0.042553	0.404255	0.081485	0.494341	0.287913	11.3393	8.39623	1	1	0	2	2	0	0	2	0	0	0	0	1	2	2	0	0	0	2	0	2	2	2	0	0	2
7107222|F|0-42:A>C-42:A>C	TGCAGAGACATCCAAGGATAATTCAAAAGTAACAGAGGTTCAAAAACCAGATTACATTCATGTCCGAGC	TGCAGAGACATCCAAGGATAATTCAAAAGTAACAGAGGTTCAAAAACCAGATTACATTCATGTCCGAGC	scaffold09231	191648	1	2.2033e-27	Chromosome04	22622847	1	5.18104e-29	42:A>C	42	0.978723	1	0.293478	0.706522	0	0.293478	0	0.414698	0.207349	8.05172	3.57576	1	0	2	2	0	0	0	2	0	0	0	0	2	0	0	2	0	2	0	0	0	0	0	0	0	0
7112076|F|0-31:G>A-31:G>A	TGCAGAGACATCTACTCCTGATGCTCCTCCTGCAAATTTTGCAGGTAATCGTCCTCCCAGTTCTTTATT	TGCAGAGACATCTACTCCTGATGCTCCTCCTGCAAATTTTGCAGGTAATCGTCCTCCCAGTTCTTTATT	scaffold01193	260476	1	2.2033e-27	Chromosome16	11805660	1	2.4105e-27	31:G>A	31	1	0.957447	0.095745	0.904255	0.042553	0.053191	0.081485	0.173155	0.12732	20.1593	11.1	1	0	0	0	0	1	0	0	0	0	0	0	0	0	0	0	0	0	0	0	0	0	0	0	0	2
20485254|F|0-40:T>C-40:T>C	TGCAGAGACATGACTATGAATACCACAATGCAAAATTATCTAACTACATGCTGTACTAAGGACAATCAA	TGCAGAGACATGACTATGAATACCACAATGCAAAATTATCTAACTACATGCTGTACTAAGGACAATCAA	scaffold05911	38045	1	4.73568e-29	Chromosome03	8284019	1	5.18104e-29	40:T>C	40	1	0.978723	0.159574	0.840426	0.021277	0.138298	0.041648	0.268221	0.154934	30.9483	15.2941	1	0	0	0	0	0	0	0	0	2	0	0	0	0	2	0	0	0	0	0	0	0	0	0	0	0
7119979|F|0-16:T>C-16:T>C	TGCAGAGACCACAAGATAATGTGATATGCCACCCTCTTGTGAAAACAGCAAGAACCAAAAGTATTTTGT	TGCAGAGACCACAAGATAATGTGATATGCCACCCTCTTGTGAAAACAGCAAGAACCAAAAGTATTTTGT	scaffold06044	24486	1	2.2033e-27	Chromosome14	4875265	1	2.4105e-27	16:T>C	16	0.978723	0.967391	0.51087	0.48913	0.032609	0.478261	0.063091	0.499764	0.281427	10.7345	6.33333	1	0	2	2	0	2	0	2	0	0	0	0	0	0	2	0	0	0	0	2	0	0	2	0	0	2
7112078|F|0-10:G>A-10:G>A	TGCAGAGACCGGAAACAGATGATGAAAGCGGCGGCTCTCCGGTATGTTCTAAAATCAGTGCTAGAGTTT	TGCAGAGACCGGAAACAGATGATGAAAGCGGCGGCTCTCCGGTATGTTCTAAAATCAGTGCTAGAGTTT	scaffold06011	299159	1	4.73568e-29	Chromosome05	7494523	1	5.18104e-29	10:G>A	10	0.989362	0.978495	0.27957	0.72043	0.021505	0.258065	0.042086	0.402821	0.222453	19.4348	11.7742	1	0	0	0	0	0	0	0	0	0	0	0	0	0	2	0	0	2	2	0	0	0	2	2	0	2
7112080|F|0-34:T>A-34:T>A	TGCAGAGACGAGGTTCACGCATAAGAGCTGCTTGTGTCAGAAAGACAAAACCGGCTACAAGAATCTCTC	TGCAGAGACGAGGTTCACGCATAAGAGCTGCTTGTGTCAGAAAGACAAAACCGGCTACAAGAATCTCTC	scaffold04182	340909	1	2.2033e-27	Chromosome11	26144948	1	2.4105e-27	34:T>A	34	1	0.893617	0.734043	0.265957	0.106383	0.62766	0.190131	0.390448	0.29029	24.2924	22.1163	1	0	1	2	2	0	2	2	2	0	2	2	0	0	2	2	2	1	2	0	2	2	0	2	2	2
7112082|F|0-9:T>C-9:T>C	TGCAGAGACTAAGTAGTTGAGGTGAGCATGCTCTGCAAGAACCAAGGTAAAACAAAACACTAGGTTTCA	TGCAGAGACTAAGTAGTTGAGGTGAGCATGCTCTGCAAGAACCAAGGTAAAACAAAACACTAGGTTTCA	scaffold06512	1593039	1	4.73568e-29	Chromosome02	8546510	1	5.18104e-29	9:T>C	9	1	0.989362	0.170213	0.829787	0.010638	0.159574	0.02105	0.282481	0.151766	8.38462	4.3	1	2	0	0	0	0	0	0	0	0	0	0	0	2	0	0	0	0	0	0	2	0	0	2	0	0
7147520|F|0-37:G>T-37:G>T	TGCAGAGACTATACAATGCGGGAGGGCGTAGATTTGCGATTGTGGGTCTGCCACCCATTGGCTGCCTAC	TGCAGAGACTATACAATGCGGGAGGGCGTAGATTTGCGATTGTGGGTCTGCCACCCATTGGCTGCCTAC	scaffold00435	41674	1	4.73568e-29	Chromosome07	25711686	1	5.18104e-29	37:G>T	37	1	1	0.042553	0.957447	0	0.042553	0	0.081485	0.040742	8.50847	6.5	1	0	0	0	0	0	0	0	0	0	0	0	0	0	0	0	0	0	0	0	0	0	0	0	0	0
7107223|F|0-9:T>C-9:T>C	TGCAGAGACTCTGGGAGCCTTGATGAATCCCCAATCACAGAGATTCGAACACCTTCCCTGTCAATAAGA	TGCAGAGACTCTGGGAGCCTTGATGAATCCCCAATCACAGAGATTCGAACACCTTCCCTGTCAATAAGA	scaffold03150	206252	1	4.73568e-29	Chromosome01	26848099	1	5.18104e-29	9:T>C	9	0.978723	1	0.23913	0.76087	0	0.23913	0	0.363894	0.181947	8.30172	3.93333	1	0	2	2	0	0	0	2	0	0	0	0	2	0	2	2	0	0	2	0	0	2	2	0	0	0
7119983|F|0-15:C>T-15:C>T	TGCAGAGACTGATTTCCTTGTCTTACTTCAGTTGCCTGATAATTCCTTTTGGTTCCATACATCTAATGG	TGCAGAGACTGATTTCCTTGTCTTACTTCAGTTGCCTGATAATTCCTTTTGGTTCCATACATCTAATGG	scaffold02193	42457	1	4.73568e-29	Chromosome02	28538660	1	5.18104e-29	15:C>T	15	1	0.989362	0.191489	0.808511	0.010638	0.180851	0.02105	0.309642	0.165346	22.2759	16.0417	1	0	2	2	0	2	0	0	0	0	0	0	0	2	0	0	0	0	1	0	0	0	0	2	0	2
7109880|F|0-26:C>T-26:C>T	TGCAGAGACTGCTCTTCCGAAGAGTCCTTTGATATCGTTCCCCAGTGAATTGATTTCTGAATTACAGAT	TGCAGAGACTGCTCTTCCGAAGAGTCCTTTGATATCGTTCCCCAGTGAATTGATTTCTGAATTAC	scaffold04450	338860	1	2.65588e-26	Chromosome01	34494750	1	2.83471e-26	26:C>T	26	1	1	0.297872	0.702128	0	0.297872	0	0.418289	0.209144	16.0509	12.973	1	0	2	0	2	2	0	2	0	0	0	0	0	0	2	0	0	0	2	0	0	2	2	0	2	0
7143248|F|0-22:T>A-22:T>A	TGCAGAGACTGGCGGAGAGCGCTAATAGTGGAGTTAGAATAATGATAAACTCCAGCAGTAAATAAAAAA	TGCAGAGACTGGCGGAGAGCGCTAATAGTGGAGTTAGAATAATGATAAACTCCAGCAGTAAATAAAAAA	scaffold04305	38047	1	4.73568e-29	Chromosome09	22834784	1	5.18104e-29	22:T>A	22	0.989362	0.989247	0.086022	0.913978	0.010753	0.075269	0.021274	0.157244	0.089259	11.7043	5.90909	1	0	0	0	0	2	0	0	0	2	0	0	0	0	0	0	0	0	0	0	0	0	0	0	1	0
7112084|F|0-36:G>A-36:G>A	TGCAGAGACTGGTAACCTGTTGGCAACCACCAATAAGCGTTGTTTGTGCAGCCGTTCAGATCCATCAAC	TGCAGAGACTGGTAACCTGTTGGCAACCACCAATAAGCGTTGTTTGTGCAGCCGTTCAGATCCATCAAC	scaffold06582	347009	1	4.73568e-29	Chromosome15	8777313	1	5.18104e-29	36:G>A	36	1	1	0.117021	0.882979	0	0.117021	0	0.206655	0.103327	16.3898	7	1	2	0	0	2	2	0	0	0	0	0	0	0	0	0	0	0	0	0	0	0	0	0	0	0	0
7107226|F|0-11:C>T-11:C>T	TGCAGAGACTTCATTGTCGGCTTATAATAGAATAGAGAAACATATGAGAATATAGCTCTGGTAAGTTGA	TGCAGAGACTTCATTGTCGGCTTATAATAGAATAGAGAAACATATGAGAATATAGCTCTGGTAAGTTGA	scaffold05213	63922	1	4.73568e-29	Chromosome13	16167239	1	5.18104e-29	11:C>T	11	1	0.989362	0.148936	0.851064	0.010638	0.138298	0.02105	0.253508	0.137279	16.2845	8.23529	1	0	0	0	0	0	0	0	0	0	0	2	2	0	0	0	0	0	0	0	0	0	1	0	0	2
7146334|F|0-15:A>T-15:A>T	TGCAGAGACTTTGGGACGAGGTTTTGGTGTTTTGGTGTCACACTATCACTAGAGAAAAGAGAGAGCTTA	TGCAGAGACTTTGGGACGAGGTTTTGGTGTTTTGGTGTCACACTATCACTAGAGAAAAGAGAGAGCTTA	scaffold07318	208966	1	4.73568e-29	Chromosome03	2948656	1	5.18104e-29	15:A>T	15	0.904255	0.952941	0.082353	0.917647	0.047059	0.035294	0.089689	0.151142	0.120415	11.604	6.9	1	2	0	1	0	0	0	-	0	0	0	0	0	0	0	0	0	0	0	-	0	2	0	1	0	0
7112089|F|0-46:G>C-46:G>C	TGCAGAGAGAAAGCTAAAGAAATTTGGGAATGGACGTGATAAAGACGCAGCAAATACAGTCAAGGCCAA	TGCAGAGAGAAAGCTAAAGAAATTTGGGAATGGACGTGATAAAGACGCAGCAAATACAGTCAAGGCCAA	scaffold03651	39517	1	4.73568e-29	Chromosome09	22340578	1	5.18104e-29	46:G>C	46	1	0.968085	0.138298	0.861702	0.031915	0.106383	0.061793	0.238343	0.150068	9.01739	4.875	1	0	0	2	0	0	0	0	0	0	0	0	0	0	2	0	0	0	0	0	0	2	0	0	0	2
7106776|F|0-19:C>A-19:C>A	TGCAGAGAGAAGAGAAAAACATCCATCAATTGTAGTAATATGATGGAAAAGTCAGGCATGTGAATGGAA	TGCAGAGAGAAGAGAAAAACATCCATCAATTGTAGTAATATGATGGAAAAGTCAGGCATGTGAATGGAA	scaffold07035	56432	1	1.0251e-25	Chromosome02	1920190	1	5.18104e-29	19:C>A	19	0.978723	1	0.130435	0.869565	0	0.130435	0	0.226843	0.113422	9.71552	4.86667	1	2	0	0	0	0	0	2	0	0	0	0	0	0	0	0	0	0	2	0	0	0	0	0	0	0
7112091|F|0-44:T>A-44:T>A	TGCAGAGAGACGACTTGGATTGTTTCTGATTGGACTAGAGTTTGTTTTTTCATTATATAGAAAAAAGTG	TGCAGAGAGACGACTTGGATTGTTTCTGATTGGACTAGAGTTTGTTTTTTCATTATATAGAAAAAAGTG	scaffold09000	60621	1	4.73568e-29	Chromosome16	2509945	1	5.18104e-29	44:T>A	44	0.819149	0.519481	0.597403	0.402597	0.480519	0.116883	0.499241	0.481025	0.490133	3.42593	5	1	1	0	0	0	1	1	0	1	0	1	-	0	2	0	2	1	0	-	-	0	0	0	-	2	0
7139187|F|0-50:A>G-50:A>G	TGCAGAGAGAGACAACAAACAACTTATTTCTAGGTTGAAGAAGCAACACAATGAATAAGATACTGACAC	TGCAGAGAGAGACAACAAACAACTTATTTCTAGGTTGAAGAAGCAACACAATGAATAAGATACTGACAC	scaffold05335	831752	1	1.0251e-25	Chromosome17	25776935	1	1.1215e-25	50:A>G	50	0.968085	0.483516	0.802198	0.197802	0.516484	0.285714	0.499457	0.317353	0.408405	12.1897	12.1778	1	1	2	2	0	2	1	2	1	2	1	2	2	1	1	0	1	-	2	1	0	0	0	1	0	0
20471849|F|0-65:A>C-65:A>C	TGCAGAGAGAGAGAGAAACAAAAGGCAACATCAGACCAATAGTTAGGGAAAAGGATGAAGCAACAAAAC	TGCAGAGAGAGAGAGAAACAAAAGGCAACATCAGACCAATAGTTAGGGAAAAGGATGAAGCAACAAAAC	scaffold00363	46269	1	4.73568e-29	Chromosome11	9538395	1	5.18104e-29	65:A>C	65	0.93617	0.897727	0.272727	0.727273	0.102273	0.170455	0.183626	0.396694	0.29016	3.96939	2.6875	1	2	2	2	0	2	0	0	0	0	0	0	0	1	0	-	0	1	2	0	0	0	2	-	0	0
7112097|F|0-30:A>T-30:A>T	TGCAGAGAGAGTAAAAATAACTGAAATAAAACTTTAGGTTTCTATCCACGGCAGAACTAATCATAAATC	TGCAGAGAGAGTAAAAATAACTGAAATAAAACTTTAGGTTTCTATCCACGGCAGAACTAATCATAAATC	scaffold00847	498848	1	4.73568e-29	Chromosome16	26517936	1	5.18104e-29	30:A>T	30	1	0.978723	0.212766	0.787234	0.021277	0.191489	0.041648	0.334993	0.188321	9.85217	5.08333	1	0	2	0	2	0	0	2	0	0	0	0	0	0	0	0	0	0	0	0	0	0	0	0	1	0
[truncated: 19,462 more rows]
[truncated: 69 more columns]
